# Supplementary material for: Data‐Driven Discovery of Molecular Targets for Antibody‐Drug Conjugates in Cancer Treatment
Source: Hindawi journal article supplement (doi:10.1155/2021/2670573), 2021-01-01
Supplement: f1 [file 2670573.f1.pdf]

## Web Extra Materials

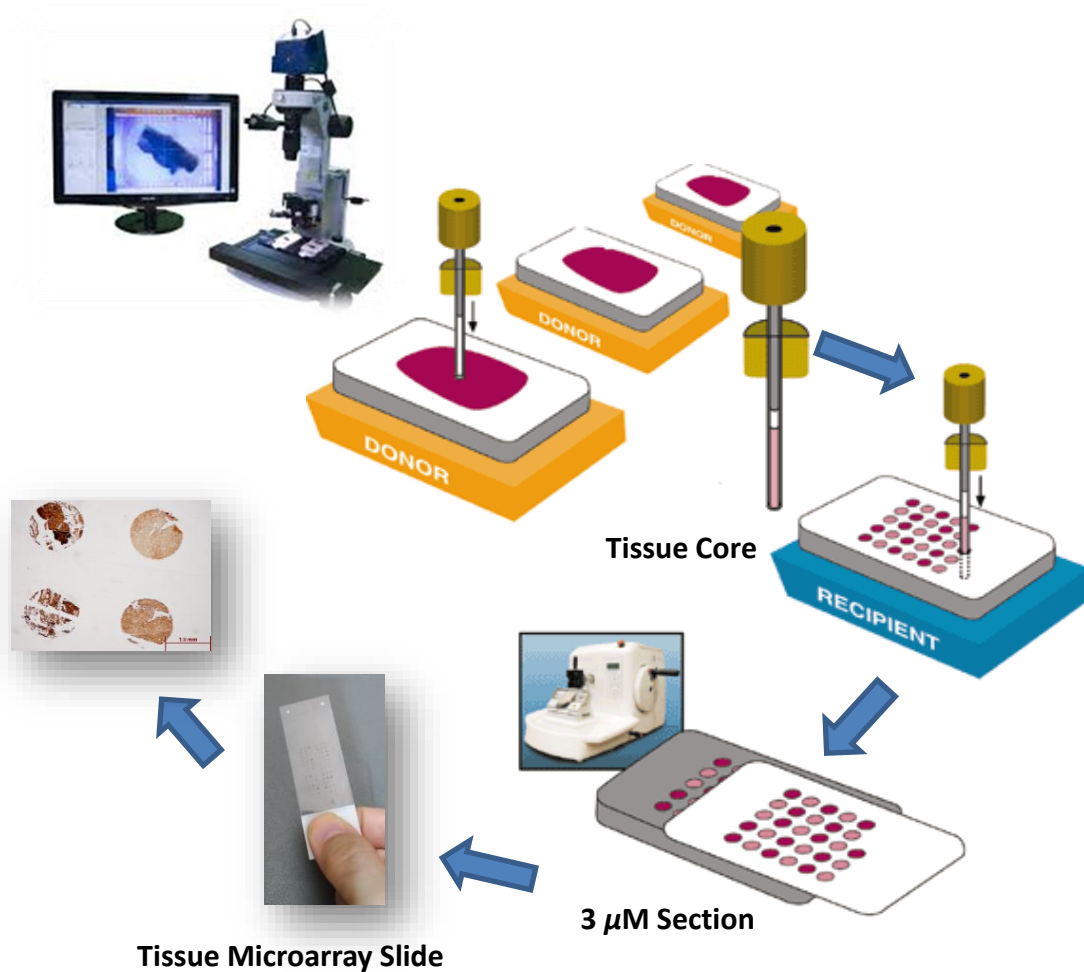

**Supplementary Figure S1.** Process of tissue microarray construction.

Representative areas of the tumor were identified by a pathologist on H&E stained sections. Reference histological slides with the specific area marked by the pathologist were aligned with the respective donor block. The corresponding areas were marked on paraffin blocks and three parallel tissue cores were obtained per tumor to account for intratumoral heterogeneity. Tissue arrays were constructed by placing 1 mm diameter cores in recipient paraffin blocks using a tissue arrayer (Galileo TMA CK3500 Tissue Micro arrayer; ISETMA Software, Integrated System Engineering, Milan, Italy), and limited to 72 cores per recipient block. Then, consecutive sections (with a thickness of 3  $\mu$ m) were cut from each TMA block, and mounted on microscope slides. Finally, the unstained slides were deparaffinized and rehydrated using standard methods, and immunohistochemically assayed.

|          | Breast cancer | Cervical cancer | Colorectal cancer | Endometrial cancer | Glioma | Head and neck cancer | Liver cancer | Lung cancer | Melanoma | Ovarian cancer | Pancreatic cancer | Prostate cancer | Renal cancer | Stomach cancer | Testis cancer | Thyroid cancer | Urothelial cancer |
|----------|---------------|-----------------|-------------------|--------------------|--------|----------------------|--------------|-------------|----------|----------------|-------------------|-----------------|--------------|----------------|---------------|----------------|-------------------|
| ABCB1    | 0.6           | 0.3             | 4.6               | 0.6                | 2.7    | 0.2                  | 7.8          | 0.3         | 0.2      | 0.2            | 2.3               | 1.5             | 7.1          | 0.9            | 0.5           | 0.8            | 0.3               |
| ANO7     | 0.3           | 0.3             | 0.8               | 0.6                | 0.3    | 0.2                  | 0.4          | 0.4         | 0.4      | 0.1            | 0.6               | 27              | 0.5          | 0.8            | 0.5           | 0.4            | 0.3               |
| AQP5     | 0.4           | 1.9             | 0.1               | 53.8               | 2.4    | 0.2                  | 0            | 1.7         | 0.3      | 21.3           | 20.8              | 0.2             | 0            | 3.9            | 1.8           | 4.5            | 0.1               |
| ATP2B2   | 0             | 0               | 0                 | 0.4                | 3.2    | 0                    | 6.7          | 0           | 0        | 0.9            | 0                 | 0               | 0.8          | 0              | 0             | 0              | 0                 |
| CD19     | 0.2           | 0.3             | 0.3               | 0.4                | 0.1    | 0.2                  | 0.1          | 0.9         | 0.1      | 0.3            | 0.3               | 0.1             | 0.1          | 0.7            | 1.9           | 0.1            | 0.2               |
| CD276    | 23            | 14.8            | 16.5              | 26.7               | 25.2   | 25                   | 8.9          | 20.9        | 30.1     | 17.9           | 22.8              | 21.6            | 13.6         | 15.7           | 20.3          | 13.2           | 20                |
| CD79B    | 1.4           | 0.9             | 0.9               | 1                  | 0.3    | 0.9                  | 1            | 2.3         | 1.1      | 0.6            | 1.7               | 1               | 2            | 1.2            | 2.9           | 1.3            | 0.8               |
| CDCP1    | 8.5           | 19              | 16.3              | 12.3               | 1.4    | 22                   | 0.1          | 12.3        | 1.4      | 8.9            | 16.3              | 5               | 4.3          | 16.2           | 2.6           | 9.8            | 12.1              |
| CNR1     | 0.1           | 0               | 0                 | 0                  | 8.7    | 0                    | 0            | 0.4         | 0        | 0.1            | 0.4               | 0.1             | 0.2          | 0.2            | 0.4           | 0.1            | 0.1               |
| ERBB2    | 34.9          | 22.2            | 23.7              | 23.1               | 5.9    | 14.3                 | 7.2          | 19.1        | 7.5      | 18.9           | 23.1              | 26.2            | 15.4         | 22             | 7.3           | 30.4           | 35.2              |
| GPBAR1   | 0.2           | 0.1             | 0.6               | 0.3                | 0.2    | 0.2                  | 0.3          | 0.2         | 0.2      | 0.4            | 2.9               | 0.2             | 0.4          | 1.3            | 0.5           | 0.2            | 0.3               |
| HTR2B    | 0.5           | 0.2             | 0.1               | 0.7                | 0.1    | 0.1                  | 0.3          | 0.4         | 0.2      | 0.4            | 1.3               | 0.1             | 0.4          | 0.4            | 0.2           | 0.4            | 0.2               |
| ITGA3    | 8.7           | 25              | 13.3              | 11.1               | 7.1    | 49                   | 0.8          | 29.9        | 31.6     | 22.2           | 42.4              | 6.3             | 36.1         | 21.5           | 2.2           | 82.2           | 38.4              |
| MS4A1    | 0.3           | 0.2             | 0.2               | 0.1                | 0      | 0.2                  | 0.1          | 0.9         | 0        | 0              | 0.4               | 0.1             | 0.1          | 0.8            | 1             | 0.1            | 0.1               |
| MSLN     | 0.2           | 23.9            | 13.6              | 17.5               | 0.5    | 1.5                  | 0            | 7.5         | 0.1      | 290.9          | 89.7              | 0.4             | 0.5          | 19.7           | 0.2           | 0.2            | 0.4               |
| MUC16    | 0.1           | 1               | 0                 | 2.7                | 0      | 0.1                  | 0            | 0.2         | 0        | 14.2           | 0.7               | 0               | 0            | 0              | 0.1           | 0              | 0                 |
| NECTIN4  | 21            | 46.2            | 5.2               | 12                 | 0.1    | 33.1                 | 0.1          | 21.9        | 0.7      | 6.6            | 15.5              | 10.2            | 0.1          | 4.3            | 2.3           | 8.7            | 53.3              |
| PCDH7    | 1.5           | 2.9             | 0.6               | 4.4                | 1.2    | 4                    | 0            | 1.6         | 5.9      | 3.2            | 3.4               | 1.3             | 0.2          | 3.2            | 0.6           | 2.1            | 1.1               |
| SIT1     | 1.1           | 1.4             | 1.5               | 1                  | 0.3    | 1.2                  | 0.5          | 2           | 0.7      | 1              | 1.2               | 0.6             | 1.4          | 2              | 3.9           | 0.6            | 0.7               |
| SLC2A14  | 0             | 0               | 0                 | 0                  | 0.1    | 0                    | 0            | 0.1         | 0        | 0.1            | 0.1               | 0               | 0.1          | 0              | 3.9           | 0              | 0                 |
| SLC39A10 | 6             | 3.1             | 5.6               | 5.5                | 8.4    | 2.8                  | 1.1          | 5.4         | 3.5      | 8.6            | 4.7               | 7.9             | 5.5          | 4.2            | 10.4          | 19.1           | 3.5               |
| SLC6A6   | 6.9           | 4.5             | 13.4              | 10                 | 2.7    | 6.5                  | 0.6          | 11.5        | 4.6      | 4.7            | 15.3              | 1.6             | 6.9          | 8.9            | 11.2          | 8.3            | 6.9               |
| UPK1B    | 0             | 0.1             | 0                 | 5.2                | 0      | 0.5                  | 0            | 0.3         | 0        | 4.2            | 1.8               | 0               | 0.4          | 0.2            | 0.1           | 0              | 62.3              |

**Supplementary Figure S2.** A heat map depicting the FPKM values for candidate ADC targets across 17 tumor types

## **Supplementary Methods S1.** HPA-based criteria for validation steps

The immunostaining result of each antibody is compared with available gene/RNA/protein characterization data, resulting in different validations: Literature conformity and RNA consistency.

### **Literature conformity:**

Literature conformity refers to the conformance of the expression pattern to available gene/protein characterization data in scientific literature and data from bioinformatic predictions. UniProt is used as the main source of gene/protein characterization data and when relevant, available publications and other sources of information are probed in depth. Extensive or sufficient gene/protein data requires that there is evidence of existence on a protein level and that a substantial quantity of published experimental data is available from literature and public databases. Limited protein/gene data does not require evidence of existence on a protein level and refers to genes for which only bioinformatic predictions and scarce published experimental data is available.

The different options of literature conformity are:

- ☐ Consistent with extensive gene/protein characterization data
- ☐ Consistent with gene/protein characterization data
- ☐ Partly consistent with extensive gene/protein characterization data
- ☐ Partly consistent with gene/protein characterization data
- ☐ No available gene/protein characterization data
- ☐ Not consistent with gene/protein characterization data

### **RNA consistency:**

RNA consistency is based on a comparison of antibody staining in 44 normal tissues with RNA-seq data combined from HPA, GTEX and FANTOM.

RNA consistency is scored as follows:

- ☐ Consistent with RNA expression data
- ☐ Mainly consistent with RNA expression data
- ☐ Mainly not consistent with RNA expression data
- ☐ Not consistent with RNA expression data
- ☐ No internal RNA expression data available for correlation

**Verification of membrane localization:**

In addition to RNA consistency and literature conformity, verification of membrane localization were considered for expression validation of potential targets. As stated in the methods section, the IHC images and description of the staining pattern (available at the HPA database) for each antibody in cancer tissues were considered for verification of membrane localization. A predominant membranous staining in IHC samples was required for each potential target to pass the validation process. Only potential targets that passed three HPA-based validation steps were considered as candidate targets.

**Supplementary Table S1.** List of predicted surfaceome proteins

| UniProt name | UniProt description                                                                           | UniProt gene | Main-class    |
|--------------|-----------------------------------------------------------------------------------------------|--------------|---------------|
| S12A8_HUMAN  | Solute carrier family 12 member 8                                                             | SLC12A8      | Transporters  |
| ESYT3_HUMAN  | Extended synaptotagmin-3                                                                      | ESYT3        | Unclassified  |
| SC5AA_HUMAN  | Sodium/glucose cotransporter 5                                                                | SLC5A10      | Transporters  |
| CLRN2_HUMAN  | Clarin-2                                                                                      | CLRN2        | Unclassified  |
| CC50C_HUMAN  | Cell cycle control protein 50C                                                                | TMEM30C      | Miscellaneous |
| ANO9_HUMAN   | Anoctamin-9                                                                                   | ANO9         | Miscellaneous |
| S22AN_HUMAN  | Solute carrier family 22 member 23                                                            | SLC22A23     | Transporters  |
| TSN11_HUMAN  | Tetraspanin-11                                                                                | TSPAN11      | Miscellaneous |
| TM213_HUMAN  | Transmembrane protein 213                                                                     | TMEM213      | Unclassified  |
| T131L_HUMAN  | Transmembrane protein 131-like                                                                | KIAA0922     |               |
| OR2M5_HUMAN  | Olfactory receptor 2M5                                                                        | OR2M5        | Receptors     |
| O2A25_HUMAN  | Olfactory receptor 2A25                                                                       | OR2A25       | Receptors     |
| S35F4_HUMAN  | Solute carrier family 35 member F4                                                            | SLC35F4      | Transporters  |
| 5HT3E_HUMAN  | 5-hydroxytryptamine receptor 3E                                                               | HTR3E        | Transporters  |
| MEG11_HUMAN  | Multiple epidermal growth factor-like domains protein 11                                      | MEGF11       | Receptors     |
| CDHR4_HUMAN  | Cadherin-related family member 4                                                              | CDHR4        | Miscellaneous |
| T150B_HUMAN  | Transmembrane protein 150B                                                                    | TMEM150B     | Unclassified  |
| O6C74_HUMAN  | Olfactory receptor 6C74                                                                       | OR6C74       | Receptors     |
| JUNO_HUMAN   | Sperm-egg fusion protein Juno                                                                 | IZUMO1R      | Unclassified  |
| O14I1_HUMAN  | Olfactory receptor 14I1                                                                       | OR14I1       | Receptors     |
| LRIT2_HUMAN  | Leucine-rich repeat, immunoglobulin-like domain and transmembrane domain-containing protein 2 | LRIT2        | Miscellaneous |
| O5H15_HUMAN  | Olfactory receptor 5H15                                                                       | OR5H15       | Receptors     |
| O6C68_HUMAN  | Olfactory receptor 6C68                                                                       | OR6C68       | Receptors     |
| MADL2_HUMAN  | Myeloid-associated differentiation marker-like protein 2                                      | MYADML2      | Unclassified  |
| TMM8B_HUMAN  | Transmembrane protein 8B                                                                      | TMEM8B       | Unclassified  |
| OR5K3_HUMAN  | Olfactory receptor 5K3                                                                        | OR5K3        | Receptors     |
| ANTRL_HUMAN  | Anthrax toxin receptor-like                                                                   | ANTXRL       | Unclassified  |
| OR6C6_HUMAN  | Olfactory receptor 6C6                                                                        | OR6C6        | Receptors     |
| TIK12_HUMAN  | Metalloprotease TIK12                                                                         | TRABD2B      | Unclassified  |
| TM235_HUMAN  | Transmembrane protein 235                                                                     | TMEM235      | Transporters  |
| MFS2B_HUMAN  | Major facilitator superfamily domain-containing protein 2B                                    | MFS2B        | Unclassified  |
| GGT3_HUMAN   | Putative gamma-glutamyltranspeptidase 3                                                       | GGT3P        | Unclassified  |
| O51F1_HUMAN  | Olfactory receptor 51F1                                                                       | OR51F1       | Receptors     |
| OR2T8_HUMAN  | Olfactory receptor 2T8                                                                        | OR2T8        | Receptors     |
| SERC4_HUMAN  | Serine incorporator 4                                                                         | SERINC4      | Transporters  |
| O4C46_HUMAN  | Olfactory receptor 4C46                                                                       | OR4C46       | Receptors     |

|                    |                                                                    |           |               |
|--------------------|--------------------------------------------------------------------|-----------|---------------|
| <b>O5H14_HUMAN</b> | Olfactory receptor 5H14                                            | OR5H14    | Receptors     |
| <b>MANS4_HUMAN</b> | MANSC domain-containing protein 4                                  | MANSC4    | Unclassified  |
| <b>LIRA5_HUMAN</b> | Leukocyte immunoglobulin-like receptor subfamily A member 5        | LILRA5    | Receptors     |
| <b>O6C70_HUMAN</b> | Olfactory receptor 6C70                                            | OR6C70    | Receptors     |
| <b>S15A5_HUMAN</b> | Solute carrier family 15 member 5                                  | SLC15A5   | Unclassified  |
| <b>CD8BL_HUMAN</b> | Putative T-cell surface glycoprotein CD8 beta-2 chain              | CD8BP     | Unclassified  |
| <b>O6C65_HUMAN</b> | Olfactory receptor 6C65                                            | OR6C65    | Receptors     |
| <b>S22AK_HUMAN</b> | Solute carrier family 22 member 20                                 | SLC22A20  | Transporters  |
| <b>PCX2_HUMAN</b>  | Pecanex-like protein 2                                             | PCNXL2    | Unclassified  |
| <b>FCGRC_HUMAN</b> | Putative high affinity immunoglobulin gamma Fc receptor IC         | FCGR1C    | Receptors     |
| <b>OR5H1_HUMAN</b> | Olfactory receptor 5H1                                             | OR5H1     | Receptors     |
| <b>O6C75_HUMAN</b> | Olfactory receptor 6C75                                            | OR6C75    | Receptors     |
| <b>OR5BL_HUMAN</b> | Olfactory receptor 5B21                                            | OR5B21    | Receptors     |
| <b>SHSA7_HUMAN</b> | Protein shisa-7                                                    | SHISA7    |               |
| <b>O2AG2_HUMAN</b> | Olfactory receptor 2AG2                                            | OR2AG2    | Receptors     |
| <b>L37A2_HUMAN</b> | Leucine-rich repeat-containing protein 37A2                        | LRRC37A2  | Miscellaneous |
| <b>CLD24_HUMAN</b> | Putative claudin-24                                                | CLDN24    | Miscellaneous |
| <b>O6C76_HUMAN</b> | Olfactory receptor 6C76                                            | OR6C76    | Receptors     |
| <b>SIG16_HUMAN</b> | Sialic acid-binding Ig-like lectin 16                              | SIGLEC16  | Miscellaneous |
| <b>OR5K4_HUMAN</b> | Olfactory receptor 5K4                                             | OR5K4     | Receptors     |
| <b>L37A1_HUMAN</b> | Leucine-rich repeat-containing protein 37A                         | LRRC37A   | Miscellaneous |
| <b>O52A4_HUMAN</b> | Putative olfactory receptor 52A4                                   | OR52A4    | Receptors     |
| <b>O4C45_HUMAN</b> | Olfactory receptor 4C45                                            | OR4C45    | Receptors     |
| <b>O2AT4_HUMAN</b> | Olfactory receptor 2AT4                                            | OR2AT4    | Receptors     |
| <b>S38A8_HUMAN</b> | Putative sodium-coupled neutral amino acid transporter 8           | SLC38A8   | Transporters  |
| <b>DISP2_HUMAN</b> | Protein dispatched homolog 2                                       | DISP2     | Unclassified  |
| <b>GBRR3_HUMAN</b> | Gamma-aminobutyric acid receptor subunit rho-3                     | GABRR3    | Transporters  |
| <b>GSG1M_HUMAN</b> | Putative germ cell-specific gene 1-like protein 2                  |           | Unclassified  |
| <b>HIDE1_HUMAN</b> | Protein HIDE1                                                      | HIDE1     | Unclassified  |
| <b>F1712_HUMAN</b> | Protein FAM171A2                                                   | FAM171A2  | Unclassified  |
| <b>HECA2_HUMAN</b> | HEPACAM family member 2                                            | HEPACAM2  | Unclassified  |
| <b>BTNLA_HUMAN</b> | Butyrophilin-like protein 10                                       | BTNL10    |               |
| <b>K132L_HUMAN</b> | UPF0577 protein KIAA1324-like                                      | KIAA1324L | Unclassified  |
| <b>VSTM5_HUMAN</b> | V-set and transmembrane domain-containing protein 5                | VSTM5     | Unclassified  |
| <b>UPK3L_HUMAN</b> | Uroplakin-3b-like protein                                          | UPK3BL    | Miscellaneous |
| <b>O11HC_HUMAN</b> | Olfactory receptor 11H12                                           | OR11H12   | Receptors     |
| <b>TM114_HUMAN</b> | Transmembrane protein 114                                          | TMEM114   | Unclassified  |
| <b>SHSA9_HUMAN</b> | Protein shisa-9                                                    | SHISA9    | Unclassified  |
| <b>TARM1_HUMAN</b> | T-cell-interacting, activating receptor on myeloid cells protein 1 | TARM1     | Unclassified  |
| <b>ERVV1_HUMAN</b> | Endogenous retrovirus group V member 1 Env polyprotein             | ERVV-1    | Miscellaneous |

|             |                                                                       |           |               |
|-------------|-----------------------------------------------------------------------|-----------|---------------|
| ERVV2_HUMAN | Endogenous retrovirus group V member 2 Env polyprotein                | ERVV-2    | Miscellaneous |
| SHSA8_HUMAN | Putative protein shisa-8                                              | SHISA8    | Unclassified  |
| KLRF2_HUMAN | Killer cell lectin-like receptor subfamily F member 2                 | KLRF2     |               |
| MUC22_HUMAN | Mucin-22                                                              | MUC22     |               |
| CA233_HUMAN | Fibronectin type-III domain-containing transmembrane protein C1orf233 | C1orf233  |               |
| CC080_HUMAN | Uncharacterized membrane protein C3orf80                              | C3orf80   |               |
| SO1B7_HUMAN | Putative solute carrier organic anion transporter family member 1B7   | SLCO1B7   | Transporters  |
| T178B_HUMAN | Transmembrane protein 178B                                            | TMEM178B  |               |
| GFY_HUMAN   | Golgi-associated olfactory signaling regulator                        | GFY       |               |
| FZD9_HUMAN  | Frizzled-9                                                            | FZD9      | Receptors     |
| GPR25_HUMAN | Probable G-protein coupled receptor 25                                | GPR25     | Receptors     |
| TLR4_HUMAN  | Toll-like receptor 4                                                  | TLR4      | Receptors     |
| TR10A_HUMAN | Tumor necrosis factor receptor superfamily member 10A                 | TNFRSF10A | Receptors     |
| GRM8_HUMAN  | Metabotropic glutamate receptor 8                                     | GRM8      | Receptors     |
| SIRB1_HUMAN | Signal-regulatory protein beta-1                                      | SIRPB1    | Miscellaneous |
| PAR3_HUMAN  | Proteinase-activated receptor 3                                       | F2RL2     | Receptors     |
| GPR31_HUMAN | 12-(S)-hydroxy-5,8,10,14-eicosatetraenoic acid receptor               | GPR31     | Receptors     |
| UPK1A_HUMAN | Uroplakin-1a                                                          | UPK1A     | Miscellaneous |
| S28A1_HUMAN | Sodium/nucleoside cotransporter 1                                     | SLC28A1   | Transporters  |
| EAA5_HUMAN  | Excitatory amino acid transporter 5                                   | SLC1A7    | Transporters  |
| QSOX1_HUMAN | Sulfhydryl oxidase 1                                                  | QSOX1     | Enzymes       |
| P2Y10_HUMAN | Putative P2Y purinoceptor 10                                          | P2RY10    | Receptors     |
| ACATN_HUMAN | Acetyl-coenzyme A transporter 1                                       | SLC33A1   | Transporters  |
| CCRL2_HUMAN | C-C chemokine receptor-like 2                                         | CCRL2     | Receptors     |
| GFRA2_HUMAN | GDNF family receptor alpha-2                                          | GFRA2     |               |
| BT3A3_HUMAN | Butyrophilin subfamily 3 member A3                                    | BTN3A3    | Miscellaneous |
| BT3A1_HUMAN | Butyrophilin subfamily 3 member A1                                    | BTN3A1    | Miscellaneous |
| UPK2_HUMAN  | Uroplakin-2                                                           | UPK2      | Unclassified  |
| NCHL1_HUMAN | Neural cell adhesion molecule L1-like protein                         | CHL1      | Miscellaneous |
| DLL1_HUMAN  | Delta-like protein 1                                                  | DLL1      | Miscellaneous |
| CXCR6_HUMAN | C-X-C chemokine receptor type 6                                       | CXCR6     | Receptors     |
| ACKR2_HUMAN | Atypical chemokine receptor 2                                         | ACKR2     | Receptors     |
| GBRP_HUMAN  | Gamma-aminobutyric acid receptor subunit pi                           | GABRP     | Transporters  |
| PODXL_HUMAN | Podocalyxin                                                           | PODXL     | Unclassified  |
| CLD4_HUMAN  | Claudin-4                                                             | CLDN4     | Miscellaneous |
| LPPI_HUMAN  | Lipid phosphate phosphohydrolase 1                                    | PPAP2A    | Enzymes       |
| LPP3_HUMAN  | Lipid phosphate phosphohydrolase 3                                    | PPAP2B    | Enzymes       |
| NRG2_HUMAN  | Pro-neuregulin-2, membrane-bound isoform                              | NRG2      | Unclassified  |
| BAI1_HUMAN  | Brain-specific angiogenesis inhibitor 1                               | BAI1      | Receptors     |
| PTPRT_HUMAN | Receptor-type tyrosine-protein phosphatase T                          | PTPRT     | Receptors     |

|                    |                                                                      |           |               |
|--------------------|----------------------------------------------------------------------|-----------|---------------|
| <b>T194A_HUMAN</b> | Transmembrane protein 194A                                           | TMEM194A  | Unclassified  |
| <b>ASTN1_HUMAN</b> | Astrotactin-1                                                        | ASTN1     | Unclassified  |
| <b>OR7AH_HUMAN</b> | Olfactory receptor 7A17                                              | OR7A17    | Receptors     |
| <b>GPI71_HUMAN</b> | Probable G-protein coupled receptor 171                              | GPR171    | Receptors     |
| <b>ADA10_HUMAN</b> | Disintegrin and metalloproteinase domain-containing protein 10       | ADAM10    | Enzymes       |
| <b>OPSX_HUMAN</b>  | Visual pigment-like receptor peropsin                                | RRH       | Receptors     |
| <b>GBRD_HUMAN</b>  | Gamma-aminobutyric acid receptor subunit delta                       | GABRD     | Transporters  |
| <b>NRP1_HUMAN</b>  | Neuropilin-1                                                         | NRP1      | Receptors     |
| <b>TNF11_HUMAN</b> | Tumor necrosis factor ligand superfamily member 11                   | TNFSF11   | Unclassified  |
| <b>TR10C_HUMAN</b> | Tumor necrosis factor receptor superfamily member 10C                | TNFRSF10C | Receptors     |
| <b>TAAR5_HUMAN</b> | Trace amine-associated receptor 5                                    | TAAR5     | Receptors     |
| <b>TSN4_HUMAN</b>  | Tetraspanin-4                                                        | TSPAN4    | Miscellaneous |
| <b>TR13B_HUMAN</b> | Tumor necrosis factor receptor superfamily member 13B                | TNFRSF13B | Receptors     |
| <b>FFAR1_HUMAN</b> | Free fatty acid receptor 1                                           | FFAR1     | Receptors     |
| <b>FFAR3_HUMAN</b> | Free fatty acid receptor 3                                           | FFAR3     | Receptors     |
| <b>T4S5_HUMAN</b>  | Transmembrane 4 L6 family member 5                                   | TM4SF5    | Miscellaneous |
| <b>PCD17_HUMAN</b> | Protocadherin-17                                                     | PCDH17    | Miscellaneous |
| <b>NCTR3_HUMAN</b> | Natural cytotoxicity triggering receptor 3                           | NCR3      | Receptors     |
| <b>EREG_HUMAN</b>  | Proepiregulin                                                        | EREG      | Unclassified  |
| <b>PLXB2_HUMAN</b> | Plexin-B2                                                            | PLXNB2    | Receptors     |
| <b>NPC1_HUMAN</b>  | Niemann-Pick C1 protein                                              | NPC1      | Unclassified  |
| <b>MUSK_HUMAN</b>  | Muscle, skeletal receptor tyrosine-protein kinase                    | MUSK      | Receptors     |
| <b>LRAD4_HUMAN</b> | Low-density lipoprotein receptor class A domain-containing protein 4 | LDLRAD4   | Unclassified  |
| <b>EPHB6_HUMAN</b> | Ephrin type-B receptor 6                                             | EPHB6     | Receptors     |
| <b>GPI82_HUMAN</b> | G-protein coupled receptor 182                                       | GPR182    | Receptors     |
| <b>S22A2_HUMAN</b> | Solute carrier family 22 member 2                                    | SLC22A2   | Transporters  |
| <b>S22A1_HUMAN</b> | Solute carrier family 22 member 1                                    | SLC22A1   | Transporters  |
| <b>GRM6_HUMAN</b>  | Metabotropic glutamate receptor 6                                    | GRM6      | Receptors     |
| <b>TM9S1_HUMAN</b> | Transmembrane 9 superfamily member 1                                 | TM9SF1    | Miscellaneous |
| <b>GPR37_HUMAN</b> | Prosaposin receptor GPR37                                            | GPR37     | Receptors     |
| <b>MOT5_HUMAN</b>  | Monocarboxylate transporter 5                                        | SLC16A4   | Transporters  |
| <b>MOT6_HUMAN</b>  | Monocarboxylate transporter 6                                        | SLC16A5   | Transporters  |
| <b>SIGL5_HUMAN</b> | Sialic acid-binding Ig-like lectin 5                                 | SIGLEC5   | Miscellaneous |
| <b>NCAM2_HUMAN</b> | Neural cell adhesion molecule 2                                      | NCAM2     | Miscellaneous |
| <b>NMDE4_HUMAN</b> | Glutamate receptor ionotropic, NMDA 2D                               | GRIN2D    | Transporters  |
| <b>MOT7_HUMAN</b>  | Monocarboxylate transporter 7                                        | SLC16A6   | Transporters  |
| <b>COPT1_HUMAN</b> | High affinity copper uptake protein 1                                | SLC31A1   | Transporters  |
| <b>MRP3_HUMAN</b>  | Canalicular multispecific organic anion transporter 2                | ABCC3     | Transporters  |
| <b>MRP4_HUMAN</b>  | Multidrug resistance-associated protein 4                            | ABCC4     | Transporters  |
| <b>MRP5_HUMAN</b>  | Multidrug resistance-associated protein 5                            | ABCC5     | Transporters  |



|                    |                                                                |         |               |
|--------------------|----------------------------------------------------------------|---------|---------------|
| <b>TLR3_HUMAN</b>  | Toll-like receptor 3                                           | TLR3    | Receptors     |
| <b>GPR42_HUMAN</b> | G-protein coupled receptor 42                                  | GPR42   | Receptors     |
| <b>P2RX6_HUMAN</b> | P2X purinoceptor 6                                             | P2RX6   | Transporters  |
| <b>CLD3_HUMAN</b>  | Claudin-3                                                      | CLDN3   | Miscellaneous |
| <b>FFAR2_HUMAN</b> | Free fatty acid receptor 2                                     | FFAR2   | Receptors     |
| <b>ENK18_HUMAN</b> | Endogenous retrovirus group K member 18 Env polypeptide        | ERVK-18 | Miscellaneous |
| <b>FLRT2_HUMAN</b> | Leucine-rich repeat transmembrane protein FLRT2                | FLRT2   | Miscellaneous |
| <b>PLXB1_HUMAN</b> | Plexin-B1                                                      | PLXNB1  | Receptors     |
| <b>ADA12_HUMAN</b> | Disintegrin and metalloproteinase domain-containing protein 12 | ADAM12  | Enzymes       |
| <b>MTLR_HUMAN</b>  | Motilin receptor                                               | MLNR    | Receptors     |
| <b>GPR39_HUMAN</b> | G-protein coupled receptor 39                                  | GPR39   | Receptors     |
| <b>CTR4_HUMAN</b>  | Cationic amino acid transporter 4                              | SLC7A4  | Transporters  |
| <b>TREA_HUMAN</b>  | Trehalase                                                      | TREH    |               |
| <b>SPIT2_HUMAN</b> | Kunitz-type protease inhibitor 2                               | SPINT2  | Unclassified  |
| <b>LRRT2_HUMAN</b> | Leucine-rich repeat transmembrane neuronal protein 2           | LRRTM2  | Miscellaneous |
| <b>ADCY6_HUMAN</b> | Adenylate cyclase type 6                                       | ADCY6   | Enzymes       |
| <b>AQP9_HUMAN</b>  | Aquaporin-9                                                    | AQP9    | Transporters  |
| <b>GRID2_HUMAN</b> | Glutamate receptor ionotropic, delta-2                         | GRID2   | Transporters  |
| <b>PROM1_HUMAN</b> | Prominin-1                                                     | PROM1   | Unclassified  |
| <b>TGON2_HUMAN</b> | Trans-Golgi network integral membrane protein 2                | TGOLN2  | Unclassified  |
| <b>CAC1G_HUMAN</b> | Voltage-dependent T-type calcium channel subunit alpha-1G      | CACNA1G | Transporters  |
| <b>ADA20_HUMAN</b> | Disintegrin and metalloproteinase domain-containing protein 20 | ADAM20  | Enzymes       |
| <b>S26A4_HUMAN</b> | Pendrin                                                        | SLC26A4 | Transporters  |
| <b>SGCE_HUMAN</b>  | Epsilon-sarcoglycan                                            | SGCE    | Miscellaneous |
| <b>RNF13_HUMAN</b> | E3 ubiquitin-protein ligase RNF13                              | RNF13   | Unclassified  |
| <b>CAH12_HUMAN</b> | Carbonic anhydrase 12                                          | CA12    | Enzymes       |
| <b>GALR2_HUMAN</b> | Galanin receptor type 2                                        | GALR2   | Receptors     |
| <b>OX1R_HUMAN</b>  | Orexin receptor type 1                                         | HCRTR1  | Receptors     |
| <b>OX2R_HUMAN</b>  | Orexin receptor type 2                                         | HCRTR2  | Receptors     |
| <b>PSCA_HUMAN</b>  | Prostate stem cell antigen                                     | PSCA    | Unclassified  |
| <b>TSN6_HUMAN</b>  | Tetraspanin-6                                                  | TSPAN6  | Miscellaneous |
| <b>LPP2_HUMAN</b>  | Lipid phosphate phosphohydrolase 2                             | PPAP2C  | Enzymes       |
| <b>SIGL6_HUMAN</b> | Sialic acid-binding Ig-like lectin 6                           | SIGLEC6 | Miscellaneous |
| <b>OR1F1_HUMAN</b> | Olfactory receptor 1F1                                         | OR1F1   | Receptors     |
| <b>G6PT1_HUMAN</b> | Glucose-6-phosphate translocase                                | SLC37A4 | Transporters  |
| <b>S28A2_HUMAN</b> | Sodium/nucleoside cotransporter 2                              | SLC28A2 | Transporters  |
| <b>OR2T1_HUMAN</b> | Olfactory receptor 2T1                                         | OR2T1   | Receptors     |
| <b>XPP2_HUMAN</b>  | Xaa-Pro aminopeptidase 2                                       | XPPEP2  |               |
| <b>EFNA2_HUMAN</b> | Ephrin-A2                                                      | EFNA2   | Unclassified  |
| <b>MFS11_HUMAN</b> | UNC93-like protein MFSD11                                      | MFSD11  | Unclassified  |

|                    |                                                            |           |               |
|--------------------|------------------------------------------------------------|-----------|---------------|
| <b>TM11D_HUMAN</b> | Transmembrane protease serine 11D                          | TMPRSS11D | Enzymes       |
| <b>BAI2_HUMAN</b>  | Brain-specific angiogenesis inhibitor 2                    | BAI2      | Receptors     |
| <b>BAI3_HUMAN</b>  | Brain-specific angiogenesis inhibitor 3                    | BAI3      | Receptors     |
| <b>PCDH7_HUMAN</b> | Protocadherin-7                                            | PCDH7     | Miscellaneous |
| <b>ADCY3_HUMAN</b> | Adenylate cyclase type 3                                   | ADCY3     | Enzymes       |
| <b>SUSD5_HUMAN</b> | Sushi domain-containing protein 5                          | SUSD5     | Unclassified  |
| <b>L37A3_HUMAN</b> | Leucine-rich repeat-containing protein 37A3                | LRRC37A3  | Miscellaneous |
| <b>PCDGC_HUMAN</b> | Protocadherin gamma-A12                                    | PCDHGA12  | Miscellaneous |
| <b>FZD6_HUMAN</b>  | Frizzled-6                                                 | FZD6      | Receptors     |
| <b>CCG3_HUMAN</b>  | Voltage-dependent calcium channel gamma-3 subunit          | CACNG3    | Transporters  |
| <b>NMD3B_HUMAN</b> | Glutamate receptor ionotropic, NMDA 3B                     | GRIN3B    | Transporters  |
| <b>O10H2_HUMAN</b> | Olfactory receptor 10H2                                    | OR10H2    | Receptors     |
| <b>O10H3_HUMAN</b> | Olfactory receptor 10H3                                    | OR10H3    | Receptors     |
| <b>OR7C2_HUMAN</b> | Olfactory receptor 7C2                                     | OR7C2     | Receptors     |
| <b>OR11I_HUMAN</b> | Olfactory receptor 11I                                     | OR11I     | Receptors     |
| <b>LY75_HUMAN</b>  | Lymphocyte antigen 75                                      | LY75      | Receptors     |
| <b>NRP2_HUMAN</b>  | Neuropilin-2                                               | NRP2      | Receptors     |
| <b>DSCAM_HUMAN</b> | Down syndrome cell adhesion molecule                       | DSCAM     | Miscellaneous |
| <b>G137B_HUMAN</b> | Integral membrane protein GPR137B                          | GPR137B   | Unclassified  |
| <b>PLXC1_HUMAN</b> | Plexin-C1                                                  | PLXNC1    | Receptors     |
| <b>MPZL2_HUMAN</b> | Myelin protein zero-like protein 2                         | MPZL2     | Miscellaneous |
| <b>NPHN_HUMAN</b>  | Nephrin                                                    | NPHS1     | Unclassified  |
| <b>ADCY9_HUMAN</b> | Adenylate cyclase type 9                                   | ADCY9     | Enzymes       |
| <b>TLR5_HUMAN</b>  | Toll-like receptor 5                                       | TLR5      | Receptors     |
| <b>TLR2_HUMAN</b>  | Toll-like receptor 2                                       | TLR2      | Receptors     |
| <b>GFRA3_HUMAN</b> | GNDF family receptor alpha-3                               | GFRA3     | Unclassified  |
| <b>TSN1_HUMAN</b>  | Tetraspanin-1                                              | TSPAN1    | Miscellaneous |
| <b>TSN2_HUMAN</b>  | Tetraspanin-2                                              | TSPAN2    | Miscellaneous |
| <b>TSN3_HUMAN</b>  | Tetraspanin-3                                              | TSPAN3    | Miscellaneous |
| <b>MOT2_HUMAN</b>  | Monocarboxylate transporter 2                              | SLC16A7   | Transporters  |
| <b>ABCC9_HUMAN</b> | ATP-binding cassette sub-family C member 9                 | ABCC9     | Transporters  |
| <b>GALR3_HUMAN</b> | Galanin receptor type 3                                    | GALR3     | Receptors     |
| <b>S19A2_HUMAN</b> | Thiamine transporter 1                                     | SLC19A2   | Transporters  |
| <b>ETBR2_HUMAN</b> | Prosaposin receptor GPR37L1                                | GPR37L1   | Receptors     |
| <b>RAMP2_HUMAN</b> | Receptor activity-modifying protein 2                      | RAMP2     | Receptors     |
| <b>RAMP3_HUMAN</b> | Receptor activity-modifying protein 3                      | RAMP3     | Receptors     |
| <b>CTNS_HUMAN</b>  | Cystinosis                                                 | CTNS      | Unclassified  |
| <b>SCN2B_HUMAN</b> | Sodium channel subunit beta-2                              | SCN2B     | Transporters  |
| <b>ENK19_HUMAN</b> | Endogenous retrovirus group K member 19 Env polypeptide    | ERVK-19   | Miscellaneous |
| <b>FCG3B_HUMAN</b> | Low affinity immunoglobulin gamma Fc region receptor III-B | FCGR3B    | Receptors     |

|                    |                                                                |          |               |
|--------------------|----------------------------------------------------------------|----------|---------------|
| <b>LIRA1_HUMAN</b> | Leukocyte immunoglobulin-like receptor subfamily A member 1    | LILRA1   | Receptors     |
| <b>LIRB3_HUMAN</b> | Leukocyte immunoglobulin-like receptor subfamily B member 3    | LILRB3   | Receptors     |
| <b>LIRB5_HUMAN</b> | Leukocyte immunoglobulin-like receptor subfamily B member 5    | LILRB5   | Receptors     |
| <b>PLXA2_HUMAN</b> | Plexin-A2                                                      | PLXNA2   | Receptors     |
| <b>IGSF3_HUMAN</b> | Immunoglobulin superfamily member 3                            | IGSF3    | Receptors     |
| <b>LRP3_HUMAN</b>  | Low-density lipoprotein receptor-related protein 3             | LRP3     | Receptors     |
| <b>ADA23_HUMAN</b> | Disintegrin and metalloproteinase domain-containing protein 23 | ADAM23   | Enzymes       |
| <b>ADA11_HUMAN</b> | Disintegrin and metalloproteinase domain-containing protein 11 | ADAM11   | Enzymes       |
| <b>FZD7_HUMAN</b>  | Frizzled-7                                                     | FZD7     | Receptors     |
| <b>LRP4_HUMAN</b>  | Low-density lipoprotein receptor-related protein 4             | LRP4     | Receptors     |
| <b>MFA3L_HUMAN</b> | Microfibrillar-associated protein 3-like                       | MFAP3L   | Unclassified  |
| <b>ASTN2_HUMAN</b> | Astrotactin-2                                                  | ASTN2    | Unclassified  |
| <b>ICOSL_HUMAN</b> | ICOS ligand                                                    | ICOSLG   | Miscellaneous |
| <b>LRP5_HUMAN</b>  | Low-density lipoprotein receptor-related protein 5             | LRP5     | Receptors     |
| <b>CAD16_HUMAN</b> | Cadherin-16                                                    | CDH16    | Miscellaneous |
| <b>GLRA3_HUMAN</b> | Glycine receptor subunit alpha-3                               | GLRA3    | Transporters  |
| <b>LRRN2_HUMAN</b> | Leucine-rich repeat neuronal protein 2                         | LRRN2    | Miscellaneous |
| <b>SEM7A_HUMAN</b> | Semaphorin-7A                                                  | SEMA7A   |               |
| <b>ENTP3_HUMAN</b> | Ectonucleoside triphosphate diphosphohydrolase 3               | ENTPD3   | Enzymes       |
| <b>LAT3_HUMAN</b>  | Large neutral amino acids transporter small subunit 3          | SLC43A1  | Transporters  |
| <b>GPR32_HUMAN</b> | Probable G-protein coupled receptor 32                         | GPR32    | Receptors     |
| <b>TECTA_HUMAN</b> | Alpha-tectorin                                                 | TECTA    | Unclassified  |
| <b>USH2A_HUMAN</b> | Usherin                                                        | USH2A    | Unclassified  |
| <b>LGR5_HUMAN</b>  | Leucine-rich repeat-containing G-protein coupled receptor 5    | LGR5     | Receptors     |
| <b>GPC4_HUMAN</b>  | Glypican-4                                                     | GPC4     | Unclassified  |
| <b>CLD11_HUMAN</b> | Claudin-11                                                     | CLDN11   | Miscellaneous |
| <b>TNR21_HUMAN</b> | Tumor necrosis factor receptor superfamily member 21           | TNFRSF21 | Receptors     |
| <b>ITA10_HUMAN</b> | Integrin alpha-10                                              | ITGA10   | Receptors     |
| <b>LRP6_HUMAN</b>  | Low-density lipoprotein receptor-related protein 6             | LRP6     | Receptors     |
| <b>UPK3A_HUMAN</b> | Uroplakin-3a                                                   | UPK3A    | Miscellaneous |
| <b>CXB3_HUMAN</b>  | Gap junction beta-3 protein                                    | GJB3     | Miscellaneous |
| <b>S22A3_HUMAN</b> | Solute carrier family 22 member 3                              | SLC22A3  | Transporters  |
| <b>UPK1B_HUMAN</b> | Uroplakin-1b                                                   | UPK1B    | Miscellaneous |
| <b>CEAM4_HUMAN</b> | Carcinoembryonic antigen-related cell adhesion molecule 4      | CEACAM4  | Miscellaneous |
| <b>ATRN_HUMAN</b>  | Attractin                                                      | ATRN     | Unclassified  |
| <b>GABR2_HUMAN</b> | Gamma-aminobutyric acid type B receptor subunit 2              | GABBR2   | Receptors     |
| <b>TSN9_HUMAN</b>  | Tetraspanin-9                                                  | TSPAN9   | Miscellaneous |
| <b>CBPD_HUMAN</b>  | Carboxypeptidase D                                             | CPD      | Enzymes       |
| <b>OR2B3_HUMAN</b> | Putative olfactory receptor 2B3                                | OR2B3    | Receptors     |
| <b>OR2J3_HUMAN</b> | Olfactory receptor 2J3                                         | OR2J3    | Receptors     |

|              |                                                                |         |               |
|--------------|----------------------------------------------------------------|---------|---------------|
| OR2J2_HUMAN  | Olfactory receptor 2J2                                         | OR2J2   | Receptors     |
| NCTR1_HUMAN  | Natural cytotoxicity triggering receptor 1                     | NCR1    | Receptors     |
| S22A5_HUMAN  | Solute carrier family 22 member 5                              | SLC22A5 | Transporters  |
| OR7C1_HUMAN  | Olfactory receptor 7C1                                         | OR7C1   | Receptors     |
| OR7AA_HUMAN  | Olfactory receptor 7A10                                        | OR7A10  | Receptors     |
| LY6H_HUMAN   | Lymphocyte antigen 6H                                          | LY6H    |               |
| AQP8_HUMAN   | Aquaporin-8                                                    | AQP8    | Transporters  |
| CNTN5_HUMAN  | Contactin-5                                                    | CNTN5   | Unclassified  |
| NFASC_HUMAN  | Neurofascin                                                    | NFASC   | Miscellaneous |
| CSCL1_HUMAN  | CSC1-like protein 1                                            | TMEM63A | Miscellaneous |
| LRIG2_HUMAN  | Leucine-rich repeats and immunoglobulin-like domains protein 2 | LRIG2   | Miscellaneous |
| LPHN1_HUMAN  | Latrophilin-1                                                  | LPHN1   | Receptors     |
| ABCA8_HUMAN  | ATP-binding cassette sub-family A member 8                     | ABCA8   | Transporters  |
| SLIK3_HUMAN  | SLIT and NTRK-like protein 3                                   | SLITRK3 | Miscellaneous |
| SO2B1_HUMAN  | Solute carrier organic anion transporter family member 2B1     | SLCO2B1 | Transporters  |
| CSTN1_HUMAN  | Calsyntenin-1                                                  | CLSTN1  | Miscellaneous |
| SLIK5_HUMAN  | SLIT and NTRK-like protein 5                                   | SLITRK5 | Miscellaneous |
| OR2F2_HUMAN  | Olfactory receptor 2F2                                         | OR2F2   | Receptors     |
| OR6B1_HUMAN  | Olfactory receptor 6B1                                         | OR6B1   | Receptors     |
| O4F21_HUMAN  | Olfactory receptor 4F21                                        | OR4F21  | Receptors     |
| OR2A4_HUMAN  | Olfactory receptor 2A4                                         | OR2A4   | Receptors     |
| S1PR2_HUMAN  | Sphingosine 1-phosphate receptor 2                             | S1PR2   | Receptors     |
| TNF15_HUMAN  | Tumor necrosis factor ligand superfamily member 15             | TNFSF15 | Unclassified  |
| UNC5C_HUMAN  | Netrin receptor UNC5C                                          | UNC5C   | Receptors     |
| CSPG5_HUMAN  | Chondroitin sulfate proteoglycan 5                             | CSPG5   | Unclassified  |
| PCDH8_HUMAN  | Protocadherin-8                                                | PCDH8   | Miscellaneous |
| OR5F1_HUMAN  | Olfactory receptor 5F1                                         | OR5F1   | Receptors     |
| OR6A2_HUMAN  | Olfactory receptor 6A2                                         | OR6A2   | Receptors     |
| IL18RA_HUMAN | Interleukin-18 receptor accessory protein                      | IL18RAP | Receptors     |
| 5HT3B_HUMAN  | 5-hydroxytryptamine receptor 3B                                | HTR3B   | Transporters  |
| LYPD3_HUMAN  | Ly6/PLAUR domain-containing protein 3                          | LYPD3   | Unclassified  |
| KCNK5_HUMAN  | Potassium channel subfamily K member 5                         | KCNK5   | Transporters  |
| MPZL1_HUMAN  | Myelin protein zero-like protein 1                             | MPZL1   | Miscellaneous |
| ABCB11_HUMAN | Bile salt export pump                                          | ABCB11  | Transporters  |
| OR2C1_HUMAN  | Olfactory receptor 2C1                                         | OR2C1   | Receptors     |
| CXB5_HUMAN   | Gap junction beta-5 protein                                    | GJB5    | Miscellaneous |
| NPT2B_HUMAN  | Sodium-dependent phosphate transport protein 2B                | SLC34A2 | Transporters  |
| CXB6_HUMAN   | Gap junction beta-6 protein                                    | GJB6    | Miscellaneous |
| CLDN7_HUMAN  | Claudin-7                                                      | CLDN7   | Miscellaneous |
| ABCA1_HUMAN  | ATP-binding cassette sub-family A member 1                     | ABCA1   | Transporters  |

|                    |                                                                    |          |               |
|--------------------|--------------------------------------------------------------------|----------|---------------|
| <b>CLD9_HUMAN</b>  | Claudin-9                                                          | CLDN9    | Miscellaneous |
| <b>LPHN2_HUMAN</b> | Latrophilin-2                                                      | LPHN2    | Receptors     |
| <b>VNN1_HUMAN</b>  | Pantetheinase                                                      | VNN1     | Unclassified  |
| <b>VNN2_HUMAN</b>  | Vascular non-inflammatory molecule 2                               | VNN2     | Unclassified  |
| <b>GTR10_HUMAN</b> | Solute carrier family 2, facilitated glucose transporter member 10 | SLC2A10  | Transporters  |
| <b>ADCY5_HUMAN</b> | Adenylate cyclase type 5                                           | ADCY5    | Enzymes       |
| <b>NTR2_HUMAN</b>  | Neurotensin receptor type 2                                        | NTSR2    | Receptors     |
| <b>CRTAM_HUMAN</b> | Cytotoxic and regulatory T-cell molecule                           | CRTAM    | Miscellaneous |
| <b>SEM4F_HUMAN</b> | Semaphorin-4F                                                      | SEMA4F   | Miscellaneous |
| <b>GPR75_HUMAN</b> | Probable G-protein coupled receptor 75                             | GPR75    | Receptors     |
| <b>CLD1_HUMAN</b>  | Claudin-1                                                          | CLDN1    | Miscellaneous |
| <b>GLP2R_HUMAN</b> | Glucagon-like peptide 2 receptor                                   | GLP2R    | Receptors     |
| <b>TSN13_HUMAN</b> | Tetraspanin-13                                                     | TSPAN13  | Miscellaneous |
| <b>TSN15_HUMAN</b> | Tetraspanin-15                                                     | TSPAN15  | Miscellaneous |
| <b>G6B_HUMAN</b>   | Protein G6b                                                        | G6B      | Unclassified  |
| <b>LY66C_HUMAN</b> | Lymphocyte antigen 6 complex locus protein G6c                     | LY6G6C   | Unclassified  |
| <b>LY66D_HUMAN</b> | Lymphocyte antigen 6 complex locus protein G6d                     | LY6G6D   | Unclassified  |
| <b>MOT3_HUMAN</b>  | Monocarboxylate transporter 3                                      | SLC16A8  | Transporters  |
| <b>OR2H2_HUMAN</b> | Olfactory receptor 2H2                                             | OR2H2    | Receptors     |
| <b>NCTR2_HUMAN</b> | Natural cytotoxicity triggering receptor 2                         | NCR2     | Receptors     |
| <b>BY55_HUMAN</b>  | CD160 antigen                                                      | CD160    |               |
| <b>IGSF6_HUMAN</b> | Immunoglobulin superfamily member 6                                | IGSF6    | Receptors     |
| <b>S1PR4_HUMAN</b> | Sphingosine 1-phosphate receptor 4                                 | S1PR4    | Receptors     |
| <b>RECK_HUMAN</b>  | Reversion-inducing cysteine-rich protein with Kazal motifs         | RECK     |               |
| <b>EGFR_HUMAN</b>  | Epidermal growth factor receptor                                   | EGFR     | Receptors     |
| <b>LDLR_HUMAN</b>  | Low-density lipoprotein receptor                                   | LDLR     | Receptors     |
| <b>EGF_HUMAN</b>   | Pro-epidermal growth factor                                        | EGF      | Receptors     |
| <b>TGFA_HUMAN</b>  | Protransforming growth factor alpha                                | TGFA     | Unclassified  |
| <b>IL2RA_HUMAN</b> | Interleukin-2 receptor subunit alpha                               | IL2RA    | Receptors     |
| <b>CD4_HUMAN</b>   | T-cell surface glycoprotein CD4                                    | CD4      | Unclassified  |
| <b>CD8A_HUMAN</b>  | T-cell surface glycoprotein CD8 alpha chain                        | CD8A     | Unclassified  |
| <b>PIGR_HUMAN</b>  | Polymeric immunoglobulin receptor                                  | PIGR     | Receptors     |
| <b>1B07_HUMAN</b>  | HLA class I histocompatibility antigen, B-7 alpha chain            | HLA-B    | Miscellaneous |
| <b>1A68_HUMAN</b>  | HLA class I histocompatibility antigen, A-68 alpha chain           | HLA-A    | Miscellaneous |
| <b>1A02_HUMAN</b>  | HLA class I histocompatibility antigen, A-2 alpha chain            | HLA-A    | Miscellaneous |
| <b>HLAH_HUMAN</b>  | Putative HLA class I histocompatibility antigen, alpha chain H     | HLA-H    | Miscellaneous |
| <b>DRA_HUMAN</b>   | HLA class II histocompatibility antigen, DR alpha chain            | HLA-DRA  | Miscellaneous |
| <b>DQA2_HUMAN</b>  | HLA class II histocompatibility antigen, DQ alpha 2 chain          | HLA-DQA2 | Miscellaneous |
| <b>DQA1_HUMAN</b>  | HLA class II histocompatibility antigen, DQ alpha 1 chain          | HLA-DQA1 | Miscellaneous |
| <b>2B1F_HUMAN</b>  | HLA class II histocompatibility antigen, DRB1-15 beta chain        | HLA-DRB1 | Miscellaneous |

|                    |                                                                          |          |               |
|--------------------|--------------------------------------------------------------------------|----------|---------------|
| <b>2B13_HUMAN</b>  | HLA class II histocompatibility antigen, DRB1-3 chain                    | HLA-DRB1 | Miscellaneous |
| <b>DQB1_HUMAN</b>  | HLA class II histocompatibility antigen, DQ beta 1 chain                 | HLA-DQB1 | Miscellaneous |
| <b>ACHA_HUMAN</b>  | Acetylcholine receptor subunit alpha                                     | CHRNA1   | Transporters  |
| <b>GLPA_HUMAN</b>  | Glycophorin-A                                                            | GYPA     | Unclassified  |
| <b>B3AT_HUMAN</b>  | Band 3 anion transport protein                                           | SLC4A1   | Transporters  |
| <b>TRGC2_HUMAN</b> | T-cell receptor gamma-2 chain C region                                   | TRGC2    | Receptors     |
| <b>1B27_HUMAN</b>  | HLA class I histocompatibility antigen, B-27 alpha chain                 | HLA-B    | Miscellaneous |
| <b>OPSB_HUMAN</b>  | Short-wave-sensitive opsin 1                                             | OPN1SW   | Receptors     |
| <b>OPSR_HUMAN</b>  | Long-wave-sensitive opsin 1                                              | OPN1LW   | Receptors     |
| <b>OPSG_HUMAN</b>  | Medium-wave-sensitive opsin 1                                            | OPN1MW   | Receptors     |
| <b>PRIO_HUMAN</b>  | Major prion protein                                                      | PRNP     | Unclassified  |
| <b>MAS_HUMAN</b>   | Proto-oncogene Mas                                                       | MAS1     | Receptors     |
| <b>THY1_HUMAN</b>  | Thy-1 membrane glycoprotein                                              | THY1     |               |
| <b>1C03_HUMAN</b>  | HLA class I histocompatibility antigen, Cw-3 alpha chain                 | HLA-C    | Miscellaneous |
| <b>2B11_HUMAN</b>  | HLA class II histocompatibility antigen, DRB1-1 beta chain               | HLA-DRB1 | Miscellaneous |
| <b>HG2A_HUMAN</b>  | HLA class II histocompatibility antigen gamma chain                      | CD74     | Unclassified  |
| <b>CD3D_HUMAN</b>  | T-cell surface glycoprotein CD3 delta chain                              | CD3D     |               |
| <b>1A03_HUMAN</b>  | HLA class I histocompatibility antigen, A-3 alpha chain                  | HLA-A    | Miscellaneous |
| <b>DPB1_HUMAN</b>  | HLA class II histocompatibility antigen, DP beta 1 chain                 | HLA-DPB1 | Miscellaneous |
| <b>ERBB2_HUMAN</b> | Receptor tyrosine-protein kinase erbB-2                                  | ERBB2    | Receptors     |
| <b>NTRK1_HUMAN</b> | High affinity nerve growth factor receptor                               | NTRK1    | Receptors     |
| <b>CY24B_HUMAN</b> | Cytochrome b-245 heavy chain                                             | CYBB     | Enzymes       |
| <b>RPN1_HUMAN</b>  | Dolichyl-diphosphooligosaccharide--protein glycosyltransferase subunit 1 | RPN1     | Enzymes       |
| <b>GLPC_HUMAN</b>  | Glycophorin-C                                                            | GYPC     | Unclassified  |
| <b>AT1A1_HUMAN</b> | Sodium/potassium-transporting ATPase subunit alpha-1                     | ATP1A1   | Transporters  |
| <b>AT1B1_HUMAN</b> | Sodium/potassium-transporting ATPase subunit beta-1                      | ATP1B1   | Transporters  |
| <b>A4_HUMAN</b>    | Amyloid beta A4 protein                                                  | APP      | Unclassified  |
| <b>ITB3_HUMAN</b>  | Integrin beta-3                                                          | ITGB3    | Receptors     |
| <b>ITB2_HUMAN</b>  | Integrin beta-2                                                          | ITGB2    | Receptors     |
| <b>PPBT_HUMAN</b>  | Alkaline phosphatase, tissue-nonspecific isozyme                         | ALPL     |               |
| <b>PPBI_HUMAN</b>  | Alkaline phosphatase, placental type                                     | ALPP     |               |
| <b>ICAM1_HUMAN</b> | Intercellular adhesion molecule 1                                        | ICAM1    | Unclassified  |
| <b>1A24_HUMAN</b>  | HLA class I histocompatibility antigen, A-24 alpha chain                 | HLA-A    | Miscellaneous |
| <b>DQB2_HUMAN</b>  | HLA class II histocompatibility antigen, DQ beta 2 chain                 | HLA-DQB2 | Unclassified  |
| <b>ITB1_HUMAN</b>  | Integrin beta-1                                                          | ITGB1    | Receptors     |
| <b>CD1A_HUMAN</b>  | T-cell surface glycoprotein CD1a                                         | CD1A     | Receptors     |
| <b>CD5_HUMAN</b>   | T-cell surface glycoprotein CD5                                          | CD5      | Unclassified  |
| <b>INSR_HUMAN</b>  | Insulin receptor                                                         | INSR     | Receptors     |
| <b>DOA_HUMAN</b>   | HLA class II histocompatibility antigen, DO alpha chain                  | HLA-DOA  | Miscellaneous |
| <b>CD2_HUMAN</b>   | T-cell surface antigen CD2                                               | CD2      | Unclassified  |

|                    |                                                            |         |               |
|--------------------|------------------------------------------------------------|---------|---------------|
| <b>CEAM5_HUMAN</b> | Carcinoembryonic antigen-related cell adhesion molecule 5  | CEACAM5 | Miscellaneous |
| <b>ITAV_HUMAN</b>  | Integrin alpha-V                                           | ITGAV   | Receptors     |
| <b>LIPL_HUMAN</b>  | Lipoprotein lipase                                         | LPL     |               |
| <b>PERT_HUMAN</b>  | Thyroid peroxidase                                         | TPO     | Enzymes       |
| <b>TRBM_HUMAN</b>  | Thrombomodulin                                             | THBD    | Unclassified  |
| <b>ASGR1_HUMAN</b> | Asialoglycoprotein receptor 1                              | ASGR1   | Receptors     |
| <b>ASGR2_HUMAN</b> | Asialoglycoprotein receptor 2                              | ASGR2   | Receptors     |
| <b>CSF1R_HUMAN</b> | Macrophage colony-stimulating factor 1 receptor            | CSF1R   | Receptors     |
| <b>GP1BA_HUMAN</b> | Platelet glycoprotein Ib alpha chain                       | GP1BA   | Miscellaneous |
| <b>ACHG_HUMAN</b>  | Acetylcholine receptor subunit gamma                       | CHRNA3  | Transporters  |
| <b>ADRB2_HUMAN</b> | Beta-2 adrenergic receptor                                 | ADRB2   | Receptors     |
| <b>UROM_HUMAN</b>  | Uromodulin                                                 | UMOD    | Unclassified  |
| <b>RET_HUMAN</b>   | Proto-oncogene tyrosine-protein kinase receptor Ret        | RET     | Receptors     |
| <b>CXB1_HUMAN</b>  | Gap junction beta-1 protein                                | GJB1    | Miscellaneous |
| <b>IGF1R_HUMAN</b> | Insulin-like growth factor 1 receptor                      | IGF1R   | Receptors     |
| <b>OPSD_HUMAN</b>  | Rhodopsin                                                  | RHO     | Receptors     |
| <b>TNR16_HUMAN</b> | Tumor necrosis factor receptor superfamily member 16       | NGFR    | Receptors     |
| <b>ACM2_HUMAN</b>  | Muscarinic acetylcholine receptor M2                       | CHRM2   | Receptors     |
| <b>ACM4_HUMAN</b>  | Muscarinic acetylcholine receptor M4                       | CHRM4   | Receptors     |
| <b>DAF_HUMAN</b>   | Complement decay-accelerating factor                       | CD55    |               |
| <b>MDR1_HUMAN</b>  | Multidrug resistance protein 1                             | ABCB1   | Transporters  |
| <b>4F2_HUMAN</b>   | 4F2 cell-surface antigen heavy chain                       | SLC3A2  | Transporters  |
| <b>SYPH_HUMAN</b>  | Synaptophysin                                              | SYP     | Miscellaneous |
| <b>NEP_HUMAN</b>   | Neprilysin                                                 | MME     | Enzymes       |
| <b>ITA2B_HUMAN</b> | Integrin alpha-IIb                                         | ITGA2B  | Receptors     |
| <b>CD14_HUMAN</b>  | Monocyte differentiation antigen CD14                      | CD14    |               |
| <b>PTPRC_HUMAN</b> | Receptor-type tyrosine-protein phosphatase C               | PTPRC   | Receptors     |
| <b>MET_HUMAN</b>   | Hepatocyte growth factor receptor                          | MET     | Receptors     |
| <b>TRFM_HUMAN</b>  | Melanotransferrin                                          | MFI2    |               |
| <b>ADRB1_HUMAN</b> | Beta-1 adrenergic receptor                                 | ADRB1   | Receptors     |
| <b>FCG3A_HUMAN</b> | Low affinity immunoglobulin gamma Fc region receptor III-A | FCGR3A  | Receptors     |
| <b>ITA5_HUMAN</b>  | Integrin alpha-5                                           | ITGA5   | Receptors     |
| <b>STS_HUMAN</b>   | Steryl-sulfatase                                           | STS     | Enzymes       |
| <b>IL6RA_HUMAN</b> | Interleukin-6 receptor subunit alpha                       | IL6R    | Receptors     |
| <b>5HT1A_HUMAN</b> | 5-hydroxytryptamine receptor 1A                            | HTR1A   | Receptors     |
| <b>ACM5_HUMAN</b>  | Muscarinic acetylcholine receptor M5                       | CHRM5   | Receptors     |
| <b>ADA2A_HUMAN</b> | Alpha-2A adrenergic receptor                               | ADRA2A  | Receptors     |
| <b>ROS1_HUMAN</b>  | Proto-oncogene tyrosine-protein kinase ROS                 | ROS1    | Receptors     |
| <b>CD63_HUMAN</b>  | CD63 antigen                                               | CD63    | Miscellaneous |
| <b>PKHD1_HUMAN</b> | Fibrocystin                                                | PKHD1   | Unclassified  |

|                    |                                                                                                   |          |               |
|--------------------|---------------------------------------------------------------------------------------------------|----------|---------------|
| <b>P3_HUMAN</b>    | P3 protein                                                                                        | SLC10A3  | Transporters  |
| <b>CD48_HUMAN</b>  | CD48 antigen                                                                                      | CD48     | Unclassified  |
| <b>CD7_HUMAN</b>   | T-cell antigen CD7                                                                                | CD7      | Unclassified  |
| <b>CSF1_HUMAN</b>  | Macrophage colony-stimulating factor 1                                                            | CSF1     | Unclassified  |
| <b>PGFRB_HUMAN</b> | Platelet-derived growth factor receptor beta                                                      | PDGFRB   | Receptors     |
| <b>CD3G_HUMAN</b>  | T-cell surface glycoprotein CD3 gamma chain                                                       | CD3G     | Unclassified  |
| <b>TACD2_HUMAN</b> | Tumor-associated calcium signal transducer 2                                                      | TACSTD2  | Unclassified  |
| <b>LPH_HUMAN</b>   | Lactase-phlorizin hydrolase                                                                       | LCT      | Enzymes       |
| <b>PPBI_HUMAN</b>  | Intestinal-type alkaline phosphatase                                                              | ALPI     |               |
| <b>FURIN_HUMAN</b> | Furin                                                                                             | FURIN    | Enzymes       |
| <b>OR4A8_HUMAN</b> | Putative olfactory receptor 4A8                                                                   | OR4A8P   | Receptors     |
| <b>O5AL1_HUMAN</b> | Olfactory receptor 5AL1                                                                           | OR5AL1   | Receptors     |
| <b>OR4Q2_HUMAN</b> | Olfactory receptor 4Q2                                                                            | OR4Q2    | Receptors     |
| <b>OR5G3_HUMAN</b> | Olfactory receptor 5G3                                                                            | OR5G3    | Receptors     |
| <b>O5AC1_HUMAN</b> | Olfactory receptor 5AC1                                                                           | OR5AC1   | Receptors     |
| <b>O10J4_HUMAN</b> | Olfactory receptor 10J4                                                                           | OR10J4   | Receptors     |
| <b>OR4E1_HUMAN</b> | Olfactory receptor 4E1                                                                            | OR4E1    | Receptors     |
| <b>O52Z1_HUMAN</b> | Olfactory receptor 52Z1                                                                           | OR52Z1   | Receptors     |
| <b>LIGO3_HUMAN</b> | Leucine-rich repeat and immunoglobulin-like domain-containing nogo receptor-interacting protein 3 | LINGO3   | Miscellaneous |
| <b>OR8U8_HUMAN</b> | Olfactory receptor 8U8                                                                            | OR8U8    | Receptors     |
| <b>OR8U9_HUMAN</b> | Olfactory receptor 8U9                                                                            | OR8U9    | Receptors     |
| <b>OR9G9_HUMAN</b> | Olfactory receptor 9G9                                                                            | OR9G9    | Receptors     |
| <b>OR2T7_HUMAN</b> | Olfactory receptor 2T7                                                                            | OR2T7    | Receptors     |
| <b>O56A5_HUMAN</b> | Olfactory receptor 56A5                                                                           | OR56A5   | Receptors     |
| <b>ELFN1_HUMAN</b> | Protein ELFN1                                                                                     | ELFN1    | Miscellaneous |
| <b>ZH11B_HUMAN</b> | Probable palmitoyltransferase ZDHHC11B                                                            | ZDHHC11B | Enzymes       |
| <b>CFC1_HUMAN</b>  | Cryptic protein                                                                                   | CFC1     | Unclassified  |
| <b>TPBGL_HUMAN</b> | Trophoblast glycoprotein-like                                                                     | TPBGL    | Miscellaneous |
| <b>1A32_HUMAN</b>  | HLA class I histocompatibility antigen, A-32 alpha chain                                          | HLA-A    | Miscellaneous |
| <b>1A69_HUMAN</b>  | HLA class I histocompatibility antigen, A-69 alpha chain                                          | HLA-A    | Miscellaneous |
| <b>1B58_HUMAN</b>  | HLA class I histocompatibility antigen, B-58 alpha chain                                          | HLA-B    | Miscellaneous |
| <b>1C07_HUMAN</b>  | HLA class I histocompatibility antigen, Cw-7 alpha chain                                          | HLA-C    | Miscellaneous |
| <b>PTPRF_HUMAN</b> | Receptor-type tyrosine-protein phosphatase F                                                      | PTPRF    | Receptors     |
| <b>TFPI1_HUMAN</b> | Tissue factor pathway inhibitor                                                                   | TFPI     |               |
| <b>PPBN_HUMAN</b>  | Alkaline phosphatase, placental-like                                                              | ALPPL2   |               |
| <b>KIT_HUMAN</b>   | Mast/stem cell growth factor receptor Kit                                                         | KIT      | Receptors     |
| <b>CD28_HUMAN</b>  | T-cell-specific surface glycoprotein CD28                                                         | CD28     | Unclassified  |
| <b>GHR_HUMAN</b>   | Growth hormone receptor                                                                           | GHR      | Receptors     |
| <b>CD8B_HUMAN</b>  | T-cell surface glycoprotein CD8 beta chain                                                        | CD8B     | Unclassified  |
| <b>CD37_HUMAN</b>  | Leukocyte antigen CD37                                                                            | CD37     | Miscellaneous |



|                    |                                                                   |          |               |
|--------------------|-------------------------------------------------------------------|----------|---------------|
| <b>PPAL_HUMAN</b>  | Lysosomal acid phosphatase                                        | ACP2     | Enzymes       |
| <b>GTR1_HUMAN</b>  | Solute carrier family 2, facilitated glucose transporter member 1 | SLC2A1   | Transporters  |
| <b>GTR2_HUMAN</b>  | Solute carrier family 2, facilitated glucose transporter member 2 | SLC2A2   | Transporters  |
| <b>GTR3_HUMAN</b>  | Solute carrier family 2, facilitated glucose transporter member 3 | SLC2A3   | Transporters  |
| <b>ITAM_HUMAN</b>  | Integrin alpha-M                                                  | ITGAM    | Receptors     |
| <b>ACM1_HUMAN</b>  | Muscarinic acetylcholine receptor M1                              | CHRM1    | Receptors     |
| <b>ACHB_HUMAN</b>  | Acetylcholine receptor subunit beta                               | CHRNA1   | Transporters  |
| <b>LAMP1_HUMAN</b> | Lysosome-associated membrane glycoprotein 1                       | LAMP1    | Receptors     |
| <b>FGFR1_HUMAN</b> | Fibroblast growth factor receptor 1                               | FGFR1    | Receptors     |
| <b>MPRI_HUMAN</b>  | Cation-independent mannose-6-phosphate receptor                   | IGF2R    | Unclassified  |
| <b>CD20_HUMAN</b>  | B-lymphocyte antigen CD20                                         | MS4A1    | Miscellaneous |
| <b>CD79A_HUMAN</b> | B-cell antigen receptor complex-associated protein alpha chain    | CD79A    | Unclassified  |
| <b>FCGR1_HUMAN</b> | High affinity immunoglobulin gamma Fc receptor I                  | FCGR1A   | Receptors     |
| <b>FCG2A_HUMAN</b> | Low affinity immunoglobulin gamma Fc region receptor II-a         | FCGR2A   | Receptors     |
| <b>FCER1_HUMAN</b> | High affinity immunoglobulin epsilon receptor subunit alpha       | FCER1A   | Receptors     |
| <b>ACE_HUMAN</b>   | Angiotensin-converting enzyme                                     | ACE      | Enzymes       |
| <b>CADH1_HUMAN</b> | Cadherin-1                                                        | CDH1     | Miscellaneous |
| <b>GP1BB_HUMAN</b> | Platelet glycoprotein Ib beta chain                               | GP1BB    | Miscellaneous |
| <b>TDGF1_HUMAN</b> | Teratocarcinoma-derived growth factor 1                           | TDGF1    | Unclassified  |
| <b>LAMP2_HUMAN</b> | Lysosome-associated membrane glycoprotein 2                       | LAMP2    | Receptors     |
| <b>NCAM1_HUMAN</b> | Neural cell adhesion molecule 1                                   | NCAM1    | Miscellaneous |
| <b>ICAM2_HUMAN</b> | Intercellular adhesion molecule 2                                 | ICAM2    | Unclassified  |
| <b>ITA4_HUMAN</b>  | Integrin alpha-4                                                  | ITGA4    | Receptors     |
| <b>AT1A3_HUMAN</b> | Sodium/potassium-transporting ATPase subunit alpha-3              | ATP1A3   | Transporters  |
| <b>CEAM1_HUMAN</b> | Carcinoembryonic antigen-related cell adhesion molecule 1         | CEACAM1  | Miscellaneous |
| <b>TF_HUMAN</b>    | Tissue factor                                                     | F3       | Unclassified  |
| <b>1A11_HUMAN</b>  | HLA class I histocompatibility antigen, A-11 alpha chain          | HLA-A    | Miscellaneous |
| <b>HLAE_HUMAN</b>  | HLA class I histocompatibility antigen, alpha chain E             | HLA-E    | Miscellaneous |
| <b>2B14_HUMAN</b>  | HLA class II histocompatibility antigen, DRB1-4 beta chain        | HLA-DRB1 | Miscellaneous |
| <b>2B17_HUMAN</b>  | HLA class II histocompatibility antigen, DRB1-7 beta chain        | HLA-DRB1 | Miscellaneous |
| <b>DRB4_HUMAN</b>  | HLA class II histocompatibility antigen, DR beta 4 chain          | HLA-DRB4 | Miscellaneous |
| <b>DOB_HUMAN</b>   | HLA class II histocompatibility antigen, DO beta chain            | HLA-DOB  | Miscellaneous |
| <b>SC5A1_HUMAN</b> | Sodium/glucose cotransporter 1                                    | SLC5A1   | Transporters  |
| <b>ADRB3_HUMAN</b> | Beta-3 adrenergic receptor                                        | ADRB3    | Receptors     |
| <b>CD59_HUMAN</b>  | CD59 glycoprotein                                                 | CD59     |               |
| <b>LYAM1_HUMAN</b> | L-selectin                                                        | SELL     | Receptors     |
| <b>FOLR2_HUMAN</b> | Folate receptor beta                                              | FOLR2    | Unclassified  |
| <b>CBPM_HUMAN</b>  | Carboxypeptidase M                                                | CPM      | Enzymes       |
| <b>AT1B2_HUMAN</b> | Sodium/potassium-transporting ATPase subunit beta-2               | ATP1B2   | Transporters  |
| <b>DRD2_HUMAN</b>  | D(2) dopamine receptor                                            | DRD2     | Receptors     |

|                    |                                                                         |        |               |
|--------------------|-------------------------------------------------------------------------|--------|---------------|
| <b>INSRR_HUMAN</b> | Insulin receptor-related protein                                        | INSRR  | Receptors     |
| <b>GTR4_HUMAN</b>  | Solute carrier family 2, facilitated glucose transporter member 4       | SLC2A4 | Transporters  |
| <b>TYRO_HUMAN</b>  | Tyrosinase                                                              | TYR    | Enzymes       |
| <b>IL1R1_HUMAN</b> | Interleukin-1 receptor type 1                                           | IL1R1  | Receptors     |
| <b>IL2RB_HUMAN</b> | Interleukin-2 receptor subunit beta                                     | IL2RB  | Receptors     |
| <b>GBRA1_HUMAN</b> | Gamma-aminobutyric acid receptor subunit alpha-1                        | GABRA1 | Transporters  |
| <b>AMPN_HUMAN</b>  | Aminopeptidase N                                                        | ANPEP  | Enzymes       |
| <b>PVR_HUMAN</b>   | Poliovirus receptor                                                     | PVR    | Receptors     |
| <b>INGR1_HUMAN</b> | Interferon gamma receptor 1                                             | IFNGR1 | Receptors     |
| <b>FOLR1_HUMAN</b> | Folate receptor alpha                                                   | FOLR1  | Unclassified  |
| <b>CD19_HUMAN</b>  | B-lymphocyte antigen CD19                                               | CD19   | Unclassified  |
| <b>CSF2R_HUMAN</b> | Granulocyte-macrophage colony-stimulating factor receptor subunit alpha | CSF2RA | Receptors     |
| <b>AREG_HUMAN</b>  | Amphiregulin                                                            | AREG   | Unclassified  |
| <b>MCP_HUMAN</b>   | Membrane cofactor protein                                               | CD46   | Unclassified  |
| <b>CD1E_HUMAN</b>  | T-cell surface glycoprotein CD1e, membrane-associated                   | CD1E   | Receptors     |
| <b>CD1D_HUMAN</b>  | Antigen-presenting glycoprotein CD1d                                    | CD1D   | Receptors     |
| <b>MUC1_HUMAN</b>  | Mucin-1                                                                 | MUC1   | Unclassified  |
| <b>ANPRA_HUMAN</b> | Atrial natriuretic peptide receptor 1                                   | NPR1   | Receptors     |
| <b>CD44_HUMAN</b>  | CD44 antigen                                                            | CD44   | Unclassified  |
| <b>LYAM3_HUMAN</b> | P-selectin                                                              | SELP   | Receptors     |
| <b>ITB4_HUMAN</b>  | Integrin beta-4                                                         | ITGB4  | Receptors     |
| <b>LEUK_HUMAN</b>  | Leukosialin                                                             | SPN    | Unclassified  |
| <b>1A30_HUMAN</b>  | HLA class I histocompatibility antigen, A-30 alpha chain                | HLA-A  | Miscellaneous |
| <b>1A31_HUMAN</b>  | HLA class I histocompatibility antigen, A-31 alpha chain                | HLA-A  | Miscellaneous |
| <b>1A33_HUMAN</b>  | HLA class I histocompatibility antigen, A-33 alpha chain                | HLA-A  | Miscellaneous |
| <b>PGFRA_HUMAN</b> | Platelet-derived growth factor receptor alpha                           | PDGFRA | Receptors     |
| <b>PECA1_HUMAN</b> | Platelet endothelial cell adhesion molecule                             | PECAM1 | Unclassified  |
| <b>CTLA4_HUMAN</b> | Cytotoxic T-lymphocyte protein 4                                        | CTLA4  | Unclassified  |
| <b>EPCAM_HUMAN</b> | Epithelial cell adhesion molecule                                       | EPCAM  | Unclassified  |
| <b>DPEP1_HUMAN</b> | Dipeptidase 1                                                           | DPEP1  | Enzymes       |
| <b>PRLR_HUMAN</b>  | Prolactin receptor                                                      | PRLR   | Receptors     |
| <b>TSHR_HUMAN</b>  | Thyrotropin receptor                                                    | TSHR   | Receptors     |
| <b>LYAM2_HUMAN</b> | E-selectin                                                              | SELE   | Receptors     |
| <b>CD36_HUMAN</b>  | Platelet glycoprotein 4                                                 | CD36   | Receptors     |
| <b>IL7RA_HUMAN</b> | Interleukin-7 receptor subunit alpha                                    | IL7R   | Receptors     |
| <b>INAR1_HUMAN</b> | Interferon alpha/beta receptor 1                                        | IFNAR1 | Receptors     |
| <b>ITA2_HUMAN</b>  | Integrin alpha-2                                                        | ITGA2  | Receptors     |
| <b>CXA1_HUMAN</b>  | Gap junction alpha-1 protein                                            | GJA1   | Miscellaneous |
| <b>ANPRC_HUMAN</b> | Atrial natriuretic peptide receptor 3                                   | NPR3   | Receptors     |
| <b>TYRP1_HUMAN</b> | 5,6-dihydroxyindole-2-carboxylic acid oxidase                           | TYRP1  | Unclassified  |

|                       |                                                             |          |               |
|-----------------------|-------------------------------------------------------------|----------|---------------|
| <b>HLA_G_HUMAN</b>    | HLA class I histocompatibility antigen, alpha chain G       | HLA-G    | Miscellaneous |
| <b>ACHB2_HUMAN</b>    | Neuronal acetylcholine receptor subunit beta-2              | CHRNA2   | Transporters  |
| <b>EGLN_HUMAN</b>     | Endoglin                                                    | ENG      | Unclassified  |
| <b>CR1_HUMAN</b>      | Complement receptor type 1                                  | CR1      | Unclassified  |
| <b>VGFR1_HUMAN</b>    | Vascular endothelial growth factor receptor 1               | FLT1     | Receptors     |
| <b>ITB5_HUMAN</b>     | Integrin beta-5                                             | ITGB5    | Receptors     |
| <b>ADA2B_HUMAN</b>    | Alpha-2B adrenergic receptor                                | ADRA2B   | Receptors     |
| <b>PTPRA_HUMAN</b>    | Receptor-type tyrosine-protein phosphatase alpha            | PTPRA    | Receptors     |
| <b>1A25_HUMAN</b>     | HLA class I histocompatibility antigen, A-25 alpha chain    | HLA-A    | Miscellaneous |
| <b>1B37_HUMAN</b>     | HLA class I histocompatibility antigen, B-37 alpha chain    | HLA-B    | Miscellaneous |
| <b>1B51_HUMAN</b>     | HLA class I histocompatibility antigen, B-51 alpha chain    | HLA-B    | Miscellaneous |
| <b>1B57_HUMAN</b>     | HLA class I histocompatibility antigen, B-57 alpha chain    | HLA-B    | Miscellaneous |
| <b>GABRB1_HUMAN</b>   | Gamma-aminobutyric acid receptor subunit beta-1             | GABRB1   | Transporters  |
| <b>GABRG2_HUMAN</b>   | Gamma-aminobutyric acid receptor subunit gamma-2            | GABRG2   | Transporters  |
| <b>ITB6_HUMAN</b>     | Integrin beta-6                                             | ITGB6    | Receptors     |
| <b>LAG3_HUMAN</b>     | Lymphocyte activation gene 3 protein                        | LAG3     | Unclassified  |
| <b>ADA2C_HUMAN</b>    | Alpha-2C adrenergic receptor                                | ADRA2C   | Receptors     |
| <b>SDC1_HUMAN</b>     | Syndecan-1                                                  | SDC1     | Receptors     |
| <b>AMD_HUMAN</b>      | Peptidyl-glycine alpha-amidating monooxygenase              | PAM      | Enzymes       |
| <b>CADH2_HUMAN</b>    | Cadherin-2                                                  | CDH2     | Miscellaneous |
| <b>TSN8_HUMAN</b>     | Tetraspanin-8                                               | TSPAN8   | Miscellaneous |
| <b>EPOR_HUMAN</b>     | Erythropoietin receptor                                     | EPOR     | Receptors     |
| <b>LFA3_HUMAN</b>     | Lymphocyte function-associated antigen 3                    | CD58     | Unclassified  |
| <b>VCAM1_HUMAN</b>    | Vascular cell adhesion protein 1                            | VCAM1    | Unclassified  |
| <b>CD53_HUMAN</b>     | Leukocyte surface antigen CD53                              | CD53     | Miscellaneous |
| <b>TNFRSF1A_HUMAN</b> | Tumor necrosis factor receptor superfamily member 1A        | TNFRSF1A | Receptors     |
| <b>GGT1_HUMAN</b>     | Gamma-glutamyltranspeptidase 1                              | GGT1     | Unclassified  |
| <b>SLC9A1_HUMAN</b>   | Sodium/hydrogen exchanger 1                                 | SLC9A1   | Transporters  |
| <b>CR2_HUMAN</b>      | Complement receptor type 2                                  | CR2      | Unclassified  |
| <b>DPA1_HUMAN</b>     | HLA class II histocompatibility antigen, DP alpha 1 chain   | HLA-DPA1 | Miscellaneous |
| <b>2B1B_HUMAN</b>     | HLA class II histocompatibility antigen, DRB1-11 beta chain | HLA-DRB1 | Miscellaneous |
| <b>CD33_HUMAN</b>     | Myeloid cell surface antigen CD33                           | CD33     | Miscellaneous |
| <b>CD22_HUMAN</b>     | B-cell receptor CD22                                        | CD22     | Miscellaneous |
| <b>ACM3_HUMAN</b>     | Muscarinic acetylcholine receptor M3                        | CHRM3    | Receptors     |
| <b>TNFRSF1B_HUMAN</b> | Tumor necrosis factor receptor superfamily member 1B        | TNFRSF1B | Receptors     |
| <b>ANPRB_HUMAN</b>    | Atrial natriuretic peptide receptor 2                       | NPR2     | Receptors     |
| <b>MPRD_HUMAN</b>     | Cation-dependent mannose-6-phosphate receptor               | M6PR     | Unclassified  |
| <b>ITGA_L_HUMAN</b>   | Integrin alpha-L                                            | ITGAL    | Receptors     |
| <b>ITGA_X_HUMAN</b>   | Integrin alpha-X                                            | ITGAX    | Receptors     |
| <b>EFNA1_HUMAN</b>    | Ephrin-A1                                                   | EFNA1    | Unclassified  |

|                    |                                                                   |        |               |
|--------------------|-------------------------------------------------------------------|--------|---------------|
| <b>MAG_HUMAN</b>   | Myelin-associated glycoprotein                                    | MAG    | Miscellaneous |
| <b>MDR3_HUMAN</b>  | Multidrug resistance protein 3                                    | ABCB4  | Transporters  |
| <b>NK2R_HUMAN</b>  | Substance-K receptor                                              | TACR2  | Receptors     |
| <b>S1PR1_HUMAN</b> | Sphingosine 1-phosphate receptor 1                                | S1PR1  | Receptors     |
| <b>FPR1_HUMAN</b>  | fMet-Leu-Phe receptor                                             | FPR1   | Receptors     |
| <b>CNR1_HUMAN</b>  | Cannabinoid receptor 1                                            | CNR1   | Receptors     |
| <b>SCF_HUMAN</b>   | Kit ligand                                                        | KITLG  | Unclassified  |
| <b>5NTD_HUMAN</b>  | 5'-nucleotidase                                                   | NT5E   | Enzymes       |
| <b>EPHA1_HUMAN</b> | Ephrin type-A receptor 1                                          | EPHA1  | Receptors     |
| <b>DRD1_HUMAN</b>  | D(1A) dopamine receptor                                           | DRD1   | Receptors     |
| <b>C5AR1_HUMAN</b> | C5a anaphylatoxin chemotactic receptor 1                          | C5AR1  | Receptors     |
| <b>TA2R_HUMAN</b>  | Thromboxane A2 receptor                                           | TBXA2R | Receptors     |
| <b>ZP3_HUMAN</b>   | Zona pellucida sperm-binding protein 3                            | ZP3    | Unclassified  |
| <b>MSRE_HUMAN</b>  | Macrophage scavenger receptor types I and II                      | MSR1   | Receptors     |
| <b>FGFR2_HUMAN</b> | Fibroblast growth factor receptor 2                               | FGFR2  | Receptors     |
| <b>ERBB3_HUMAN</b> | Receptor tyrosine-protein kinase erbB-3                           | ERBB3  | Receptors     |
| <b>DRD4_HUMAN</b>  | D(4) dopamine receptor                                            | DRD4   | Receptors     |
| <b>DRD5_HUMAN</b>  | D(1B) dopamine receptor                                           | DRD5   | Receptors     |
| <b>CD9_HUMAN</b>   | CD9 antigen                                                       | CD9    | Miscellaneous |
| <b>KCNA3_HUMAN</b> | Potassium voltage-gated channel subfamily A member 3              | KCNA3  | Transporters  |
| <b>CADH3_HUMAN</b> | Cadherin-3                                                        | CDH3   | Miscellaneous |
| <b>ACES_HUMAN</b>  | Acetylcholinesterase                                              | ACHE   | Unclassified  |
| <b>ENPP1_HUMAN</b> | Ectonucleotide pyrophosphatase/phosphodiesterase family member 1  | ENPP1  | Enzymes       |
| <b>FGFR4_HUMAN</b> | Fibroblast growth factor receptor 4                               | FGFR4  | Receptors     |
| <b>FGFR3_HUMAN</b> | Fibroblast growth factor receptor 3                               | FGFR3  | Receptors     |
| <b>GTR5_HUMAN</b>  | Solute carrier family 2, facilitated glucose transporter member 5 | SLC2A5 | Transporters  |
| <b>CAH4_HUMAN</b>  | Carbonic anhydrase 4                                              | CA4    | Enzymes       |
| <b>EVI2A_HUMAN</b> | Protein EVI2A                                                     | EVI2A  | Unclassified  |
| <b>LSHR_HUMAN</b>  | Lutropin-choriogonadotropic hormone receptor                      | LHCGR  | Receptors     |
| <b>MRC1_HUMAN</b>  | Macrophage mannose receptor 1                                     | MRC1   | Receptors     |
| <b>ITA6_HUMAN</b>  | Integrin alpha-6                                                  | ITGA6  | Receptors     |
| <b>KELL_HUMAN</b>  | Kell blood group glycoprotein                                     | KEL    | Enzymes       |
| <b>GLRA1_HUMAN</b> | Glycine receptor subunit alpha-1                                  | GLRA1  | Transporters  |
| <b>GLRA2_HUMAN</b> | Glycine receptor subunit alpha-2                                  | GLRA2  | Transporters  |
| <b>PTPRB_HUMAN</b> | Receptor-type tyrosine-protein phosphatase beta                   | PTPRB  | Receptors     |
| <b>PTPRD_HUMAN</b> | Receptor-type tyrosine-protein phosphatase delta                  | PTPRD  | Receptors     |
| <b>PTPRG_HUMAN</b> | Receptor-type tyrosine-protein phosphatase gamma                  | PTPRG  | Receptors     |
| <b>PTPRZ_HUMAN</b> | Receptor-type tyrosine-protein phosphatase zeta                   | PTPRZ1 | Receptors     |
| <b>TNFL4_HUMAN</b> | Tumor necrosis factor ligand superfamily member 4                 | TNFSF4 | Unclassified  |
| <b>OMGP_HUMAN</b>  | Oligodendrocyte-myelin glycoprotein                               | OMG    |               |

|                    |                                                         |         |               |
|--------------------|---------------------------------------------------------|---------|---------------|
| <b>AT2B4_HUMAN</b> | Plasma membrane calcium-transporting ATPase 4           | ATP2B4  | Transporters  |
| <b>PRPH2_HUMAN</b> | Peripherin-2                                            | PRPH2   | Miscellaneous |
| <b>FSHR_HUMAN</b>  | Follicle-stimulating hormone receptor                   | FSHR    | Receptors     |
| <b>SC6A2_HUMAN</b> | Sodium-dependent noradrenaline transporter              | SLC6A2  | Transporters  |
| <b>GBRR1_HUMAN</b> | Gamma-aminobutyric acid receptor subunit rho-1          | GABRR1  | Transporters  |
| <b>FCAR_HUMAN</b>  | Immunoglobulin alpha Fc receptor                        | FCAR    | Unclassified  |
| <b>IL4RA_HUMAN</b> | Interleukin-4 receptor subunit alpha                    | IL4R    | Receptors     |
| <b>EDNRB_HUMAN</b> | Endothelin B receptor                                   | EDNRB   | Receptors     |
| <b>HRH2_HUMAN</b>  | Histamine H2 receptor                                   | HRH2    | Receptors     |
| <b>CXCR1_HUMAN</b> | C-X-C chemokine receptor type 1                         | CXCR1   | Receptors     |
| <b>CXCR2_HUMAN</b> | C-X-C chemokine receptor type 2                         | CXCR2   | Receptors     |
| <b>CD24_HUMAN</b>  | Signal transducer CD24                                  | CD24    |               |
| <b>FPR3_HUMAN</b>  | N-formyl peptide receptor 3                             | FPR3    | Receptors     |
| <b>FPR2_HUMAN</b>  | N-formyl peptide receptor 2                             | FPR2    | Receptors     |
| <b>GUC2C_HUMAN</b> | Heat-stable enterotoxin receptor                        | GUCY2C  | Receptors     |
| <b>ADA1D_HUMAN</b> | Alpha-1D adrenergic receptor                            | ADRA1D  | Receptors     |
| <b>EDNRA_HUMAN</b> | Endothelin-1 receptor                                   | EDNRA   | Receptors     |
| <b>NK1R_HUMAN</b>  | Substance-P receptor                                    | TACR1   | Receptors     |
| <b>PTAFR_HUMAN</b> | Platelet-activating factor receptor                     | PTAFR   | Receptors     |
| <b>ACKR3_HUMAN</b> | Atypical chemokine receptor 3                           | ACKR3   | Receptors     |
| <b>PAR1_HUMAN</b>  | Proteinase-activated receptor 1                         | F2R     | Receptors     |
| <b>MYP0_HUMAN</b>  | Myelin protein P0                                       | MPZ     | Miscellaneous |
| <b>TNR6_HUMAN</b>  | Tumor necrosis factor receptor superfamily member 6     | FAS     | Receptors     |
| <b>NPY1R_HUMAN</b> | Neuropeptide Y receptor type 1                          | NPY1R   | Receptors     |
| <b>TNR5_HUMAN</b>  | Tumor necrosis factor receptor superfamily member 5     | CD40    | Receptors     |
| <b>ITA3_HUMAN</b>  | Integrin alpha-3                                        | ITGA3   | Receptors     |
| <b>ITB7_HUMAN</b>  | Integrin beta-7                                         | ITGB7   | Receptors     |
| <b>ITB8_HUMAN</b>  | Integrin beta-8                                         | ITGB8   | Receptors     |
| <b>NKG2A_HUMAN</b> | NKG2-A/NKG2-B type II integral membrane protein         | KLRC1   | Receptors     |
| <b>NKG2C_HUMAN</b> | NKG2-C type II integral membrane protein                | KLRC2   | Receptors     |
| <b>NKG2D_HUMAN</b> | NKG2-D type II integral membrane protein                | KLRK1   | Receptors     |
| <b>CD27_HUMAN</b>  | CD27 antigen                                            | CD27    | Receptors     |
| <b>IL3RA_HUMAN</b> | Interleukin-3 receptor subunit alpha                    | IL3RA   | Receptors     |
| <b>CNTFR_HUMAN</b> | Ciliary neurotrophic factor receptor subunit alpha      | CNTFR   | Receptors     |
| <b>AVR2A_HUMAN</b> | Activin receptor type-2A                                | ACVR2A  | Receptors     |
| <b>DPP4_HUMAN</b>  | Dipeptidyl peptidase 4                                  | DPP4    |               |
| <b>CD82_HUMAN</b>  | CD82 antigen                                            | CD82    | Miscellaneous |
| <b>IL1R2_HUMAN</b> | Interleukin-1 receptor type 2                           | IL1R2   | Receptors     |
| <b>DMA_HUMAN</b>   | HLA class II histocompatibility antigen, DM alpha chain | HLA-DMA | Miscellaneous |
| <b>DMB_HUMAN</b>   | HLA class II histocompatibility antigen, DM beta chain  | HLA-DMB | Miscellaneous |

|                     |                                                          |         |               |
|---------------------|----------------------------------------------------------|---------|---------------|
| <b>5HT1D_HUMAN</b>  | 5-hydroxytryptamine receptor 1D                          | HTR1D   | Receptors     |
| <b>5HT1B_HUMAN</b>  | 5-hydroxytryptamine receptor 1B                          | HTR1B   | Receptors     |
| <b>5HT2A_HUMAN</b>  | 5-hydroxytryptamine receptor 2A                          | HTR2A   | Receptors     |
| <b>5HT2C_HUMAN</b>  | 5-hydroxytryptamine receptor 2C                          | HTR2C   | Receptors     |
| <b>NMBR_HUMAN</b>   | Neuromedin-B receptor                                    | NMBR    | Receptors     |
| <b>GABRB3_HUMAN</b> | Gamma-aminobutyric acid receptor subunit beta-3          | GABRB3  | Transporters  |
| <b>GABRR2_HUMAN</b> | Gamma-aminobutyric acid receptor subunit rho-2           | GABRR2  | Transporters  |
| <b>5HT1E_HUMAN</b>  | 5-hydroxytryptamine receptor 1E                          | HTR1E   | Receptors     |
| <b>PTPRM_HUMAN</b>  | Receptor-type tyrosine-protein phosphatase mu            | PTPRM   | Receptors     |
| <b>CD34_HUMAN</b>   | Hematopoietic progenitor cell antigen CD34               | CD34    | Unclassified  |
| <b>CD38_HUMAN</b>   | ADP-ribosyl cyclase/cyclic ADP-ribose hydrolase 1        | CD38    | Enzymes       |
| <b>TNFR8_HUMAN</b>  | Tumor necrosis factor receptor superfamily member 8      | TNFRSF8 | Receptors     |
| <b>CD1B_HUMAN</b>   | T-cell surface glycoprotein CD1b                         | CD1B    | Receptors     |
| <b>CD1C_HUMAN</b>   | T-cell surface glycoprotein CD1c                         | CD1C    | Receptors     |
| <b>CXB2_HUMAN</b>   | Gap junction beta-2 protein                              | GJB2    | Miscellaneous |
| <b>AA2AR_HUMAN</b>  | Adenosine receptor A2a                                   | ADORA2A | Receptors     |
| <b>AA2BR_HUMAN</b>  | Adenosine receptor A2b                                   | ADORA2B | Receptors     |
| <b>EPHA2_HUMAN</b>  | Ephrin type-A receptor 2                                 | EPHA2   | Receptors     |
| <b>EPHA3_HUMAN</b>  | Ephrin type-A receptor 3                                 | EPHA3   | Receptors     |
| <b>EPHA8_HUMAN</b>  | Ephrin type-A receptor 8                                 | EPHA8   | Receptors     |
| <b>EPHB2_HUMAN</b>  | Ephrin type-B receptor 2                                 | EPHB2   | Receptors     |
| <b>NK3R_HUMAN</b>   | Neuromedin-K receptor                                    | TACR3   | Receptors     |
| <b>LTK_HUMAN</b>    | Leukocyte tyrosine kinase receptor                       | LTK     | Receptors     |
| <b>CD40L_HUMAN</b>  | CD40 ligand                                              | CD40LG  | Unclassified  |
| <b>AQP1_HUMAN</b>   | Aquaporin-1                                              | AQP1    | Transporters  |
| <b>CD6_HUMAN</b>    | T-cell differentiation antigen CD6                       | CD6     | Unclassified  |
| <b>MIP_HUMAN</b>    | Lens fiber major intrinsic protein                       | MIP     | Transporters  |
| <b>T4S1_HUMAN</b>   | Transmembrane 4 L6 family member 1                       | TM4SF1  | Miscellaneous |
| <b>BKRB2_HUMAN</b>  | B2 bradykinin receptor                                   | BDKRB2  | Receptors     |
| <b>1A01_HUMAN</b>   | HLA class I histocompatibility antigen, A-1 alpha chain  | HLA-A   | Miscellaneous |
| <b>1A23_HUMAN</b>   | HLA class I histocompatibility antigen, A-23 alpha chain | HLA-A   | Miscellaneous |
| <b>1A26_HUMAN</b>   | HLA class I histocompatibility antigen, A-26 alpha chain | HLA-A   | Miscellaneous |
| <b>1A34_HUMAN</b>   | HLA class I histocompatibility antigen, A-34 alpha chain | HLA-A   | Miscellaneous |
| <b>1A36_HUMAN</b>   | HLA class I histocompatibility antigen, A-36 alpha chain | HLA-A   | Miscellaneous |
| <b>1A43_HUMAN</b>   | HLA class I histocompatibility antigen, A-43 alpha chain | HLA-A   | Miscellaneous |
| <b>1A66_HUMAN</b>   | HLA class I histocompatibility antigen, A-66 alpha chain | HLA-A   | Miscellaneous |
| <b>1A74_HUMAN</b>   | HLA class I histocompatibility antigen, A-74 alpha chain | HLA-A   | Miscellaneous |
| <b>1B08_HUMAN</b>   | HLA class I histocompatibility antigen, B-8 alpha chain  | HLA-B   | Miscellaneous |
| <b>1B13_HUMAN</b>   | HLA class I histocompatibility antigen, B-13 alpha chain | HLA-B   | Miscellaneous |
| <b>1B14_HUMAN</b>   | HLA class I histocompatibility antigen, B-14 alpha chain | HLA-B   | Miscellaneous |

|                    |                                                           |        |               |
|--------------------|-----------------------------------------------------------|--------|---------------|
| <b>1B15_HUMAN</b>  | HLA class I histocompatibility antigen, B-15 alpha chain  | HLA-B  | Miscellaneous |
| <b>1B18_HUMAN</b>  | HLA class I histocompatibility antigen, B-18 alpha chain  | HLA-B  | Miscellaneous |
| <b>1B39_HUMAN</b>  | HLA class I histocompatibility antigen, B-39 alpha chain  | HLA-B  | Miscellaneous |
| <b>1B41_HUMAN</b>  | HLA class I histocompatibility antigen, B-41 alpha chain  | HLA-B  | Miscellaneous |
| <b>1B42_HUMAN</b>  | HLA class I histocompatibility antigen, B-42 alpha chain  | HLA-B  | Miscellaneous |
| <b>1B44_HUMAN</b>  | HLA class I histocompatibility antigen, B-44 alpha chain  | HLA-B  | Miscellaneous |
| <b>1B45_HUMAN</b>  | HLA class I histocompatibility antigen, B-45 alpha chain  | HLA-B  | Miscellaneous |
| <b>1B46_HUMAN</b>  | HLA class I histocompatibility antigen, B-46 alpha chain  | HLA-B  | Miscellaneous |
| <b>1B47_HUMAN</b>  | HLA class I histocompatibility antigen, B-47 alpha chain  | HLA-B  | Miscellaneous |
| <b>1B48_HUMAN</b>  | HLA class I histocompatibility antigen, B-48 alpha chain  | HLA-B  | Miscellaneous |
| <b>1B49_HUMAN</b>  | HLA class I histocompatibility antigen, B-49 alpha chain  | HLA-B  | Miscellaneous |
| <b>1B50_HUMAN</b>  | HLA class I histocompatibility antigen, B-50 alpha chain  | HLA-B  | Miscellaneous |
| <b>1B52_HUMAN</b>  | HLA class I histocompatibility antigen, B-52 alpha chain  | HLA-B  | Miscellaneous |
| <b>1B53_HUMAN</b>  | HLA class I histocompatibility antigen, B-53 alpha chain  | HLA-B  | Miscellaneous |
| <b>1B54_HUMAN</b>  | HLA class I histocompatibility antigen, B-54 alpha chain  | HLA-B  | Miscellaneous |
| <b>1B55_HUMAN</b>  | HLA class I histocompatibility antigen, B-55 alpha chain  | HLA-B  | Miscellaneous |
| <b>1B56_HUMAN</b>  | HLA class I histocompatibility antigen, B-56 alpha chain  | HLA-B  | Miscellaneous |
| <b>1B78_HUMAN</b>  | HLA class I histocompatibility antigen, B-78 alpha chain  | HLA-B  | Miscellaneous |
| <b>1C01_HUMAN</b>  | HLA class I histocompatibility antigen, Cw-1 alpha chain  | HLA-C  | Miscellaneous |
| <b>1C02_HUMAN</b>  | HLA class I histocompatibility antigen, Cw-2 alpha chain  | HLA-C  | Miscellaneous |
| <b>1C04_HUMAN</b>  | HLA class I histocompatibility antigen, Cw-4 alpha chain  | HLA-C  | Miscellaneous |
| <b>1C08_HUMAN</b>  | HLA class I histocompatibility antigen, Cw-8 alpha chain  | HLA-C  | Miscellaneous |
| <b>1C12_HUMAN</b>  | HLA class I histocompatibility antigen, Cw-12 alpha chain | HLA-C  | Miscellaneous |
| <b>1C14_HUMAN</b>  | HLA class I histocompatibility antigen, Cw-14 alpha chain | HLA-C  | Miscellaneous |
| <b>HLAF_HUMAN</b>  | HLA class I histocompatibility antigen, alpha chain F     | HLA-F  | Miscellaneous |
| <b>1A29_HUMAN</b>  | HLA class I histocompatibility antigen, A-29 alpha chain  | HLA-A  | Miscellaneous |
| <b>V2R_HUMAN</b>   | Vasopressin V2 receptor                                   | AVPR2  | Receptors     |
| <b>UFO_HUMAN</b>   | Tyrosine-protein kinase receptor UFO                      | AXL    | Receptors     |
| <b>SC6A1_HUMAN</b> | Sodium- and chloride-dependent GABA transporter 1         | SLC6A1 | Transporters  |
| <b>ACHA5_HUMAN</b> | Neuronal acetylcholine receptor subunit alpha-5           | CHRNA5 | Transporters  |
| <b>AA1R_HUMAN</b>  | Adenosine receptor A1                                     | ADORA1 | Receptors     |
| <b>GRPR_HUMAN</b>  | Gastrin-releasing peptide receptor                        | GRPR   | Receptors     |
| <b>AGTR1_HUMAN</b> | Type-1 angiotensin II receptor                            | AGTR1  | Receptors     |
| <b>OXYR_HUMAN</b>  | Oxytocin receptor                                         | OXTR   | Receptors     |
| <b>1B35_HUMAN</b>  | HLA class I histocompatibility antigen, B-35 alpha chain  | HLA-B  | Miscellaneous |
| <b>CTR1_HUMAN</b>  | High affinity cationic amino acid transporter 1           | SLC7A1 | Transporters  |
| <b>SSR1_HUMAN</b>  | Somatostatin receptor type 1                              | SSTR1  | Receptors     |
| <b>SSR2_HUMAN</b>  | Somatostatin receptor type 2                              | SSTR2  | Receptors     |
| <b>ACHB4_HUMAN</b> | Neuronal acetylcholine receptor subunit beta-4            | CHRNB4 | Transporters  |
| <b>5HT1F_HUMAN</b> | 5-hydroxytryptamine receptor 1F                           | HTR1F  | Receptors     |

|                    |                                                           |         |               |
|--------------------|-----------------------------------------------------------|---------|---------------|
| <b>OR1E1_HUMAN</b> | Olfactory receptor 1E1                                    | OR1E1   | Receptors     |
| <b>O10J1_HUMAN</b> | Olfactory receptor 10J1                                   | OR10J1  | Receptors     |
| <b>GNRHR_HUMAN</b> | Gonadotropin-releasing hormone receptor                   | GNRHR   | Receptors     |
| <b>CALCR_HUMAN</b> | Calcitonin receptor                                       | CALCR   | Receptors     |
| <b>NTR1_HUMAN</b>  | Neurotensin receptor type 1                               | NTSR1   | Receptors     |
| <b>CD52_HUMAN</b>  | CAMPATH-1 antigen                                         | CD52    | Unclassified  |
| <b>SSR4_HUMAN</b>  | Somatostatin receptor type 4                              | SSTR4   | Receptors     |
| <b>SC5A2_HUMAN</b> | Sodium/glucose cotransporter 2                            | SLC5A2  | Transporters  |
| <b>SC6A6_HUMAN</b> | Sodium- and chloride-dependent taurine transporter        | SLC6A6  | Transporters  |
| <b>GBRA5_HUMAN</b> | Gamma-aminobutyric acid receptor subunit alpha-5          | GABRA5  | Transporters  |
| <b>SC6A4_HUMAN</b> | Sodium-dependent serotonin transporter                    | SLC6A4  | Transporters  |
| <b>IL2RG_HUMAN</b> | Cytokine receptor common subunit gamma                    | IL2RG   | Receptors     |
| <b>FCG2B_HUMAN</b> | Low affinity immunoglobulin gamma Fc region receptor II-b | FCGR2B  | Receptors     |
| <b>FCG2C_HUMAN</b> | Low affinity immunoglobulin gamma Fc region receptor II-c | FCGR2C  | Receptors     |
| <b>CEAM8_HUMAN</b> | Carcinoembryonic antigen-related cell adhesion molecule 8 | CEACAM8 | Miscellaneous |
| <b>L1CAM_HUMAN</b> | Neural cell adhesion molecule L1                          | L1CAM   | Miscellaneous |
| <b>CCKAR_HUMAN</b> | Cholecystokinin receptor type A                           | CCKAR   | Receptors     |
| <b>GASR_HUMAN</b>  | Gastrin/cholecystokinin type B receptor                   | CCKBR   | Receptors     |
| <b>VIPR1_HUMAN</b> | Vasoactive intestinal polypeptide receptor 1              | VIPR1   | Receptors     |
| <b>MC4R_HUMAN</b>  | Melanocortin receptor 4                                   | MC4R    | Receptors     |
| <b>CCR1_HUMAN</b>  | C-C chemokine receptor type 1                             | CCR1    | Receptors     |
| <b>BRS3_HUMAN</b>  | Bombesin receptor subtype-3                               | BRS3    | Receptors     |
| <b>CCR7_HUMAN</b>  | C-C chemokine receptor type 7                             | CCR7    | Receptors     |
| <b>GP183_HUMAN</b> | G-protein coupled receptor 183                            | GPR183  | Receptors     |
| <b>ACHA3_HUMAN</b> | Neuronal acetylcholine receptor subunit alpha-3           | CHRNA3  | Transporters  |
| <b>CXCR5_HUMAN</b> | C-X-C chemokine receptor type 5                           | CXCR5   | Receptors     |
| <b>NAC1_HUMAN</b>  | Sodium/calcium exchanger 1                                | SLC8A1  | Transporters  |
| <b>SSR3_HUMAN</b>  | Somatostatin receptor type 3                              | SSTR3   | Receptors     |
| <b>DSG3_HUMAN</b>  | Desmoglein-3                                              | DSG3    | Miscellaneous |
| <b>IL3RB_HUMAN</b> | Cytokine receptor common subunit beta                     | CSF2RB  | Receptors     |
| <b>ICAM3_HUMAN</b> | Intercellular adhesion molecule 3                         | ICAM3   | Receptors     |
| <b>CD70_HUMAN</b>  | CD70 antigen                                              | CD70    | Unclassified  |
| <b>TNFL8_HUMAN</b> | Tumor necrosis factor ligand superfamily member 8         | TNFSF8  | Unclassified  |
| <b>MC5R_HUMAN</b>  | Melanocortin receptor 5                                   | MC5R    | Receptors     |
| <b>CADH5_HUMAN</b> | Cadherin-5                                                | CDH5    | Miscellaneous |
| <b>MRP1_HUMAN</b>  | Multidrug resistance-associated protein 1                 | ABCC1   | Transporters  |
| <b>CD80_HUMAN</b>  | T-lymphocyte activation antigen CD80                      | CD80    | Unclassified  |
| <b>AA3R_HUMAN</b>  | Adenosine receptor A3                                     | ADORA3  |               |
| <b>SDC2_HUMAN</b>  | Syndecan-2                                                | SDC2    | Receptors     |
| <b>CD68_HUMAN</b>  | Macrosialin                                               | CD68    | Receptors     |



|                    |                                                     |        |               |
|--------------------|-----------------------------------------------------|--------|---------------|
| <b>GBRA3_HUMAN</b> | Gamma-aminobutyric acid receptor subunit alpha-3    | GABRA3 | Transporters  |
| <b>EVI2B_HUMAN</b> | Protein EVI2B                                       | EVI2B  | Unclassified  |
| <b>RYK_HUMAN</b>   | Tyrosine-protein kinase RYK                         | RYK    | Receptors     |
| <b>5HT7R_HUMAN</b> | 5-hydroxytryptamine receptor 7                      | HTR7   | Receptors     |
| <b>CNR2_HUMAN</b>  | Cannabinoid receptor 2                              | CNR2   | Receptors     |
| <b>TRFR_HUMAN</b>  | Thyrotropin-releasing hormone receptor              | TRHR   | Receptors     |
| <b>OR1D2_HUMAN</b> | Olfactory receptor 1D2                              | OR1D2  | Receptors     |
| <b>PE2R1_HUMAN</b> | Prostaglandin E2 receptor EP1 subtype               | PTGER1 | Receptors     |
| <b>CRFR1_HUMAN</b> | Corticotropin-releasing factor receptor 1           | CRHR1  | Receptors     |
| <b>GPC1_HUMAN</b>  | Glypican-1                                          | GPC1   |               |
| <b>BTC_HUMAN</b>   | Probetacellulin                                     | BTC    | Unclassified  |
| <b>CXA4_HUMAN</b>  | Gap junction alpha-4 protein                        | GJA4   | Miscellaneous |
| <b>SSR5_HUMAN</b>  | Somatostatin receptor type 5                        | SSTR5  | Receptors     |
| <b>ADA1A_HUMAN</b> | Alpha-1A adrenergic receptor                        | ADRA1A | Receptors     |
| <b>HRH1_HUMAN</b>  | Histamine H1 receptor                               | HRH1   | Receptors     |
| <b>ADA1B_HUMAN</b> | Alpha-1B adrenergic receptor                        | ADRA1B | Receptors     |
| <b>OPRM_HUMAN</b>  | Mu-type opioid receptor                             | OPRM1  | Receptors     |
| <b>PE2R4_HUMAN</b> | Prostaglandin E2 receptor EP4 subtype               | PTGER4 | Receptors     |
| <b>MAS1L_HUMAN</b> | Mas-related G-protein coupled receptor MRG          | MAS1L  | Receptors     |
| <b>APJ_HUMAN</b>   | Apelin receptor                                     | APLNR  | Receptors     |
| <b>DRD3_HUMAN</b>  | D(3) dopamine receptor                              | DRD3   | Receptors     |
| <b>SCN1A_HUMAN</b> | Sodium channel protein type 1 subunit alpha         | SCN1A  | Transporters  |
| <b>SCN4A_HUMAN</b> | Sodium channel protein type 4 subunit alpha         | SCN4A  | Transporters  |
| <b>TIE1_HUMAN</b>  | Tyrosine-protein kinase receptor Tie-1              | TIE1   | Receptors     |
| <b>BASI_HUMAN</b>  | Basigin                                             | BSG    | Unclassified  |
| <b>VGFR3_HUMAN</b> | Vascular endothelial growth factor receptor 3       | FLT4   | Receptors     |
| <b>VGFR2_HUMAN</b> | Vascular endothelial growth factor receptor 2       | KDR    | Receptors     |
| <b>ACHA7_HUMAN</b> | Neuronal acetylcholine receptor subunit alpha-7     | CHRNA7 | Transporters  |
| <b>FLT3_HUMAN</b>  | Receptor-type tyrosine-protein kinase FLT3          | FLT3   | Receptors     |
| <b>BMP1A_HUMAN</b> | Bone morphogenetic protein receptor type-1A         | BMPR1A | Receptors     |
| <b>ACV1B_HUMAN</b> | Activin receptor type-1B                            | ACVR1B | Receptors     |
| <b>TGFR1_HUMAN</b> | TGF-beta receptor type-1                            | TGFBR1 | Receptors     |
| <b>TNR3_HUMAN</b>  | Tumor necrosis factor receptor superfamily member 3 | LTBR   | Receptors     |
| <b>ACV1L_HUMAN</b> | Serine/threonine-protein kinase receptor R3         | ACVRL1 | Receptors     |
| <b>SCNNA_HUMAN</b> | Amiloride-sensitive sodium channel subunit alpha    | SCNN1A | Unclassified  |
| <b>TGFR2_HUMAN</b> | TGF-beta receptor type-2                            | TGFBR2 | Receptors     |
| <b>V1AR_HUMAN</b>  | Vasopressin V1a receptor                            | AVPR1A | Receptors     |
| <b>INGR2_HUMAN</b> | Interferon gamma receptor 2                         | IFNGR2 | Receptors     |
| <b>HYALP_HUMAN</b> | Hyaluronidase PH-20                                 | SPAM1  | Enzymes       |
| <b>ITAE_HUMAN</b>  | Integrin alpha-E                                    | ITGAE  | Receptors     |

|                      |                                                                    |           |               |
|----------------------|--------------------------------------------------------------------|-----------|---------------|
| <b>GRIK1_HUMAN</b>   | Glutamate receptor ionotropic, kainate 1                           | GRIK1     | Transporters  |
| <b>TYRP2_HUMAN</b>   | L-dopachrome tautomerase                                           | DCT       | Enzymes       |
| <b>IL6RB_HUMAN</b>   | Interleukin-6 receptor subunit beta                                | IL6ST     | Receptors     |
| <b>GPV_HUMAN</b>     | Platelet glycoprotein V                                            | GP5       | Miscellaneous |
| <b>CEAM3_HUMAN</b>   | Carcinoembryonic antigen-related cell adhesion molecule 3          | CEACAM3   | Miscellaneous |
| <b>CEAM6_HUMAN</b>   | Carcinoembryonic antigen-related cell adhesion molecule 6          | CEACAM6   | Miscellaneous |
| <b>TACT_HUMAN</b>    | T-cell surface protein tactile                                     | CD96      | Unclassified  |
| <b>TPOR_HUMAN</b>    | Thrombopoietin receptor                                            | MPL       | Receptors     |
| <b>CD79B_HUMAN</b>   | B-cell antigen receptor complex-associated protein beta chain      | CD79B     | Unclassified  |
| <b>S26A3_HUMAN</b>   | Chloride anion exchanger                                           | SLC26A3   | Transporters  |
| <b>PMEL_HUMAN</b>    | Melanocyte protein PMEL                                            | PMEL      | Unclassified  |
| <b>OPRD_HUMAN</b>    | Delta-type opioid receptor                                         | OPRD1     | Receptors     |
| <b>OPRK_HUMAN</b>    | Kappa-type opioid receptor                                         | OPRK1     | Receptors     |
| <b>OPRX_HUMAN</b>    | Nociceptin receptor                                                | OPRL1     | Receptors     |
| <b>CASR_HUMAN</b>    | Extracellular calcium-sensing receptor                             | CASR      | Receptors     |
| <b>AQP2_HUMAN</b>    | Aquaporin-2                                                        | AQP2      | Transporters  |
| <b>OX2G_HUMAN</b>    | OX-2 membrane glycoprotein                                         | CD200     | Miscellaneous |
| <b>P2RY2_HUMAN</b>   | P2Y purinoceptor 2                                                 | P2RY2     | Receptors     |
| <b>S19A1_HUMAN</b>   | Folate transporter 1                                               | SLC19A1   | Transporters  |
| <b>PACR_HUMAN</b>    | Pituitary adenylate cyclase-activating polypeptide type I receptor | ADCYAP1R1 | Receptors     |
| <b>VIPR2_HUMAN</b>   | Vasoactive intestinal polypeptide receptor 2                       | VIPR2     | Receptors     |
| <b>GRM5_HUMAN</b>    | Metabotropic glutamate receptor 5                                  | GRM5      | Receptors     |
| <b>5HT2B_HUMAN</b>   | 5-hydroxytryptamine receptor 2B                                    | HTR2B     | Receptors     |
| <b>CCR2_HUMAN</b>    | C-C chemokine receptor type 2                                      | CCR2      | Unclassified  |
| <b>TSN7_HUMAN</b>    | Tetraspanin-7                                                      | TSPAN7    | Miscellaneous |
| <b>MC3R_HUMAN</b>    | Melanocortin receptor 3                                            | MC3R      | Receptors     |
| <b>CD86_HUMAN</b>    | T-lymphocyte activation antigen CD86                               | CD86      | Miscellaneous |
| <b>GRIA1_HUMAN</b>   | Glutamate receptor 1                                               | GRIA1     | Transporters  |
| <b>GRIA2_HUMAN</b>   | Glutamate receptor 2                                               | GRIA2     | Transporters  |
| <b>GRIA3_HUMAN</b>   | Glutamate receptor 3                                               | GRIA3     | Transporters  |
| <b>DPP6_HUMAN</b>    | Dipeptidyl aminopeptidase-like protein 6                           | DPP6      | Unclassified  |
| <b>IL12RB1_HUMAN</b> | Interleukin-12 receptor subunit beta-1                             | IL12RB1   | Receptors     |
| <b>LIFR_HUMAN</b>    | Leukemia inhibitory factor receptor                                | LIFR      | Receptors     |
| <b>ECE1_HUMAN</b>    | Endothelin-converting enzyme 1                                     | ECE1      | Enzymes       |
| <b>EAA1_HUMAN</b>    | Excitatory amino acid transporter 1                                | SLC1A3    | Transporters  |
| <b>EAA2_HUMAN</b>    | Excitatory amino acid transporter 2                                | SLC1A2    | Transporters  |
| <b>EAA3_HUMAN</b>    | Excitatory amino acid transporter 3                                | SLC1A1    | Transporters  |
| <b>SATT_HUMAN</b>    | Neutral amino acid transporter A                                   | SLC1A4    | Transporters  |
| <b>PTGFR_HUMAN</b>   | Prostaglandin F2-alpha receptor                                    | PTGFR     | Receptors     |
| <b>PTGER3_HUMAN</b>  | Prostaglandin E2 receptor EP3 subtype                              | PTGER3    | Receptors     |

|                    |                                                            |         |              |
|--------------------|------------------------------------------------------------|---------|--------------|
| <b>PE2R2_HUMAN</b> | Prostaglandin E2 receptor EP2 subtype                      | PTGER2  | Receptors    |
| <b>PI2R_HUMAN</b>  | Prostacyclin receptor                                      | PTGIR   | Receptors    |
| <b>MUC18_HUMAN</b> | Cell surface glycoprotein MUC18                            | MCAM    | Unclassified |
| <b>DCC_HUMAN</b>   | Netrin receptor DCC                                        | DCC     | Receptors    |
| <b>GLP1R_HUMAN</b> | Glucagon-like peptide 1 receptor                           | GLP1R   | Receptors    |
| <b>SSRA_HUMAN</b>  | Translocon-associated protein subunit alpha                | SSR1    | Unclassified |
| <b>TNR4_HUMAN</b>  | Tumor necrosis factor receptor superfamily member 4        | TNFRSF4 | Receptors    |
| <b>KI2L1_HUMAN</b> | Killer cell immunoglobulin-like receptor 2DL1              | KIR2DL1 | Receptors    |
| <b>KI2L2_HUMAN</b> | Killer cell immunoglobulin-like receptor 2DL2              | KIR2DL2 | Receptors    |
| <b>KI2L3_HUMAN</b> | Killer cell immunoglobulin-like receptor 2DL3              | KIR2DL3 | Receptors    |
| <b>KI3L1_HUMAN</b> | Killer cell immunoglobulin-like receptor 3DL1              | KIR3DL1 | Receptors    |
| <b>KI3L2_HUMAN</b> | Killer cell immunoglobulin-like receptor 3DL2              | KIR3DL2 | Receptors    |
| <b>KI2S2_HUMAN</b> | Killer cell immunoglobulin-like receptor 2DS2              | KIR2DS2 | Receptors    |
| <b>KI2S4_HUMAN</b> | Killer cell immunoglobulin-like receptor 2DS4              | KIR2DS4 | Receptors    |
| <b>LPAR6_HUMAN</b> | Lysophosphatidic acid receptor 6                           | LPAR6   | Receptors    |
| <b>ACHA4_HUMAN</b> | Neuronal acetylcholine receptor subunit alpha-4            | CHRNA4  | Transporters |
| <b>S15A1_HUMAN</b> | Solute carrier family 15 member 1                          | SLC15A1 | Transporters |
| <b>GPR3_HUMAN</b>  | G-protein coupled receptor 3                               | GPR3    | Receptors    |
| <b>GPR1_HUMAN</b>  | G-protein coupled receptor 1                               | GPR1    | Receptors    |
| <b>CCR10_HUMAN</b> | C-C chemokine receptor type 10                             | CCR10   | Receptors    |
| <b>GPR4_HUMAN</b>  | G-protein coupled receptor 4                               | GPR4    | Receptors    |
| <b>XCR1_HUMAN</b>  | Chemokine XC receptor 1                                    | XCR1    | Receptors    |
| <b>GPR6_HUMAN</b>  | G-protein coupled receptor 6                               | GPR6    | Receptors    |
| <b>5HT3A_HUMAN</b> | 5-hydroxytryptamine receptor 3A                            | HTR3A   | Transporters |
| <b>NOTC1_HUMAN</b> | Neurogenic locus notch homolog protein 1                   | NOTCH1  | Receptors    |
| <b>BKRB1_HUMAN</b> | B1 bradykinin receptor                                     | BDKRB1  | Receptors    |
| <b>SO1A2_HUMAN</b> | Solute carrier organic anion transporter family member 1A2 | SLCO1A2 | Transporters |
| <b>GALR1_HUMAN</b> | Galanin receptor type 1                                    | GALR1   | Receptors    |
| <b>GPR12_HUMAN</b> | G-protein coupled receptor 12                              | GPR12   | Receptors    |
| <b>RGR_HUMAN</b>   | RPE-retinal G protein-coupled receptor                     | RGR     | Receptors    |
| <b>GBRA2_HUMAN</b> | Gamma-aminobutyric acid receptor subunit alpha-2           | GABRA2  | Transporters |
| <b>GBRB2_HUMAN</b> | Gamma-aminobutyric acid receptor subunit beta-2            | GABRB2  | Transporters |
| <b>GLR_HUMAN</b>   | Glucagon receptor                                          | GCGR    | Unclassified |
| <b>SCTR_HUMAN</b>  | Secretin receptor                                          | SCTR    | Receptors    |
| <b>OR3A1_HUMAN</b> | Olfactory receptor 3A1                                     | OR3A1   | Receptors    |
| <b>OR3A4_HUMAN</b> | Putative olfactory receptor 3A4                            | OR3A4P  | Receptors    |
| <b>OR1D4_HUMAN</b> | Olfactory receptor 1D4                                     | OR1D4   | Receptors    |
| <b>OR1E2_HUMAN</b> | Olfactory receptor 1E2                                     | OR1E2   | Receptors    |
| <b>OR3A3_HUMAN</b> | Olfactory receptor 3A3                                     | OR3A3   | Receptors    |
| <b>OR1G1_HUMAN</b> | Olfactory receptor 1G1                                     | OR1G1   | Receptors    |

|                      |                                                          |         |               |
|----------------------|----------------------------------------------------------|---------|---------------|
| <b>OR3A2_HUMAN</b>   | Olfactory receptor 3A2                                   | OR3A2   | Receptors     |
| <b>5HT5A_HUMAN</b>   | 5-hydroxytryptamine receptor 5A                          | HTR5A   | Receptors     |
| <b>P2RY1_HUMAN</b>   | P2Y purinoceptor 1                                       | P2RY1   | Receptors     |
| <b>V1BR_HUMAN</b>    | Vasopressin V1b receptor                                 | AVPR1B  | Receptors     |
| <b>TNFR1_HUMAN</b>   | Tumor necrosis factor ligand superfamily member 1        | TNFR1   | Receptors     |
| <b>SC6A8_HUMAN</b>   | Sodium- and chloride-dependent creatine transporter 1    | SLC6A8  | Transporters  |
| <b>MTR1A_HUMAN</b>   | Melatonin receptor type 1A                               | MTNR1A  | Receptors     |
| <b>KCNJ4_HUMAN</b>   | Inward rectifier potassium channel 4                     | KCNJ4   | Transporters  |
| <b>GRIA4_HUMAN</b>   | Glutamate receptor 4                                     | GRIA4   | Transporters  |
| <b>GLIP1_HUMAN</b>   | Glioma pathogenesis-related protein 1                    | GLIPR1  | Unclassified  |
| <b>S6A12_HUMAN</b>   | Sodium- and chloride-dependent betaine transporter       | SLC6A12 | Transporters  |
| <b>S6A11_HUMAN</b>   | Sodium- and chloride-dependent GABA transporter 3        | SLC6A11 | Transporters  |
| <b>SC6A9_HUMAN</b>   | Sodium- and chloride-dependent glycine transporter 1     | SLC6A9  | Transporters  |
| <b>NPBW1_HUMAN</b>   | Neuropeptides B/W receptor type 1                        | NPBWR1  | Receptors     |
| <b>NPBW2_HUMAN</b>   | Neuropeptides B/W receptor type 2                        | NPBWR2  | Receptors     |
| <b>GLRB_HUMAN</b>    | Glycine receptor subunit beta                            | GLRB    | Transporters  |
| <b>GBRA4_HUMAN</b>   | Gamma-aminobutyric acid receptor subunit alpha-4         | GABRA4  | Transporters  |
| <b>TM4SF4_HUMAN</b>  | Transmembrane 4 L6 family member 4                       | TM4SF4  | Miscellaneous |
| <b>LEPR_HUMAN</b>    | Leptin receptor                                          | LEPR    | Receptors     |
| <b>CD151_HUMAN</b>   | CD151 antigen                                            | CD151   | Miscellaneous |
| <b>GIPR_HUMAN</b>    | Gastric inhibitory polypeptide receptor                  | GIPR    | Receptors     |
| <b>KCNJ3_HUMAN</b>   | G protein-activated inward rectifier potassium channel 1 | KCNJ3   | Transporters  |
| <b>IFNAR2_HUMAN</b>  | Interferon alpha/beta receptor 2                         | IFNAR2  | Receptors     |
| <b>SLC1A6_HUMAN</b>  | Excitatory amino acid transporter 4                      | SLC1A6  | Transporters  |
| <b>SLC9A3_HUMAN</b>  | Sodium/hydrogen exchanger 3                              | SLC9A3  | Transporters  |
| <b>CD97_HUMAN</b>    | CD97 antigen                                             | CD97    | Receptors     |
| <b>HCAR3_HUMAN</b>   | Hydroxycarboxylic acid receptor 3                        | HCAR3   | Receptors     |
| <b>NPY2R_HUMAN</b>   | Neuropeptide Y receptor type 2                           | NPY2R   | Receptors     |
| <b>PTH2R_HUMAN</b>   | Parathyroid hormone 2 receptor                           | PTH2R   | Receptors     |
| <b>CX3CR1_HUMAN</b>  | CX3C chemokine receptor 1                                | CX3CR1  | Receptors     |
| <b>SLC11A1_HUMAN</b> | Natural resistance-associated macrophage protein 1       | SLC11A1 | Transporters  |
| <b>SLC11A2_HUMAN</b> | Natural resistance-associated macrophage protein 2       | SLC11A2 | Transporters  |
| <b>MTNR1B_HUMAN</b>  | Melatonin receptor type 1B                               | MTNR1B  | Receptors     |
| <b>CXCR3_HUMAN</b>   | C-X-C chemokine receptor type 3                          | CXCR3   | Receptors     |
| <b>PRLHR_HUMAN</b>   | Prolactin-releasing peptide receptor                     | PRLHR   | Receptors     |
| <b>GPR15_HUMAN</b>   | G-protein coupled receptor 15                            | GPR15   | Receptors     |
| <b>PSEN1_HUMAN</b>   | Presenilin-1                                             | PSEN1   | Unclassified  |
| <b>FLT3LG_HUMAN</b>  | Fms-related tyrosine kinase 3 ligand                     | FLT3LG  | Unclassified  |
| <b>PSEN2_HUMAN</b>   | Presenilin-2                                             | PSEN2   | Unclassified  |
| <b>ENTPD1_HUMAN</b>  | Ectonucleoside triphosphate diphosphohydrolase 1         | ENTPD1  | Enzymes       |

|                    |                                                                 |         |               |
|--------------------|-----------------------------------------------------------------|---------|---------------|
| <b>AGTR2_HUMAN</b> | Type-2 angiotensin II receptor                                  | AGTR2   | Receptors     |
| <b>MMP14_HUMAN</b> | Matrix metalloproteinase-14                                     | MMP14   | Enzymes       |
| <b>NPY4R_HUMAN</b> | Neuropeptide Y receptor type 4                                  | NPY4R   | Receptors     |
| <b>5HT6R_HUMAN</b> | 5-hydroxytryptamine receptor 6                                  | HTR6    | Receptors     |
| <b>S26A2_HUMAN</b> | Sulfate transporter                                             | SLC26A2 | Transporters  |
| <b>BCAM_HUMAN</b>  | Basal cell adhesion molecule                                    | BCAM    | Miscellaneous |
| <b>AT1A2_HUMAN</b> | Sodium/potassium-transporting ATPase subunit alpha-2            | ATP1A2  | Transporters  |
| <b>ATP4B_HUMAN</b> | Potassium-transporting ATPase subunit beta                      | ATP4B   | Transporters  |
| <b>SCNNB_HUMAN</b> | Amiloride-sensitive sodium channel subunit beta                 | SCNN1B  | Unclassified  |
| <b>SCNNG_HUMAN</b> | Amiloride-sensitive sodium channel subunit gamma                | SCNN1G  | Unclassified  |
| <b>SCNND_HUMAN</b> | Amiloride-sensitive sodium channel subunit delta                | SCNN1D  | Unclassified  |
| <b>MMP16_HUMAN</b> | Matrix metalloproteinase-16                                     | MMP16   | Enzymes       |
| <b>P2RX1_HUMAN</b> | P2X purinoceptor 1                                              | P2RX1   | Transporters  |
| <b>P2RY4_HUMAN</b> | P2Y purinoceptor 4                                              | P2RY4   | Receptors     |
| <b>GPC3_HUMAN</b>  | Glypican-3                                                      | GPC3    |               |
| <b>GPM6A_HUMAN</b> | Neuronal membrane glycoprotein M6-a                             | GPM6A   | Unclassified  |
| <b>CCR3_HUMAN</b>  | C-C chemokine receptor type 3                                   | CCR3    | Receptors     |
| <b>CCR4_HUMAN</b>  | C-C chemokine receptor type 4                                   | CCR4    | Receptors     |
| <b>CCR5_HUMAN</b>  | C-C chemokine receptor type 5                                   | CCR5    | Unclassified  |
| <b>CCR6_HUMAN</b>  | C-C chemokine receptor type 6                                   | CCR6    | Receptors     |
| <b>CCR8_HUMAN</b>  | C-C chemokine receptor type 8                                   | CCR8    | Receptors     |
| <b>CCR9_HUMAN</b>  | C-C chemokine receptor type 9                                   | CCR9    | Receptors     |
| <b>APLP1_HUMAN</b> | Amyloid-like protein 1                                          | APLP1   | Unclassified  |
| <b>CLCKB_HUMAN</b> | Chloride channel protein CIC-Kb                                 | CLCNKB  | Transporters  |
| <b>PLXA3_HUMAN</b> | Plexin-A3                                                       | PLXNA3  | Receptors     |
| <b>GP143_HUMAN</b> | G-protein coupled receptor 143                                  | GPR143  | Receptors     |
| <b>ADCY7_HUMAN</b> | Adenylate cyclase type 7                                        | ADCY7   | Enzymes       |
| <b>CTR2_HUMAN</b>  | Cationic amino acid transporter 2                               | SLC7A2  | Transporters  |
| <b>EFNA3_HUMAN</b> | Ephrin-A3                                                       | EFNA3   | Unclassified  |
| <b>EFNA4_HUMAN</b> | Ephrin-A4                                                       | EFNA4   | Unclassified  |
| <b>EFNB2_HUMAN</b> | Ephrin-B2                                                       | EFNB2   | Miscellaneous |
| <b>EFNA5_HUMAN</b> | Ephrin-A5                                                       | EFNA5   | Unclassified  |
| <b>NAR1_HUMAN</b>  | GPI-linked NAD(P)(+)-arginine ADP-ribosyltransferase 1          | ART1    | Enzymes       |
| <b>ITA8_HUMAN</b>  | Integrin alpha-8                                                | ITGA8   | Receptors     |
| <b>SC5A3_HUMAN</b> | Sodium/myo-inositol cotransporter                               | SLC5A3  | Transporters  |
| <b>PTTG_HUMAN</b>  | Pituitary tumor-transforming gene 1 protein-interacting protein | PTTG1IP | Unclassified  |
| <b>MOT1_HUMAN</b>  | Monocarboxylate transporter 1                                   | SLC16A1 | Transporters  |
| <b>VMAT1_HUMAN</b> | Chromaffin granule amine transporter                            | SLC18A1 | Transporters  |
| <b>AT1B3_HUMAN</b> | Sodium/potassium-transporting ATPase subunit beta-3             | ATP1B3  | Transporters  |
| <b>EPHB3_HUMAN</b> | Ephrin type-B receptor 3                                        | EPHB3   | Receptors     |

|                    |                                                              |         |               |
|--------------------|--------------------------------------------------------------|---------|---------------|
| <b>EPHA5_HUMAN</b> | Ephrin type-A receptor 5                                     | EPHA5   | Receptors     |
| <b>EPHB4_HUMAN</b> | Ephrin type-B receptor 4                                     | EPHB4   | Receptors     |
| <b>EPHB1_HUMAN</b> | Ephrin type-B receptor 1                                     | EPHB1   | Receptors     |
| <b>EPHA4_HUMAN</b> | Ephrin type-A receptor 4                                     | EPHA4   | Receptors     |
| <b>GAS1_HUMAN</b>  | Growth arrest-specific protein 1                             | GAS1    |               |
| <b>EMP1_HUMAN</b>  | Epithelial membrane protein 1                                | EMP1    | Miscellaneous |
| <b>EMP2_HUMAN</b>  | Epithelial membrane protein 2                                | EMP2    | Miscellaneous |
| <b>EMP3_HUMAN</b>  | Epithelial membrane protein 3                                | EMP3    | Miscellaneous |
| <b>S12A2_HUMAN</b> | Solute carrier family 12 member 2                            | SLC12A2 | Transporters  |
| <b>S12A3_HUMAN</b> | Solute carrier family 12 member 3                            | SLC12A3 | Transporters  |
| <b>AQP5_HUMAN</b>  | Aquaporin-5                                                  | AQP5    | Transporters  |
| <b>MFAP3_HUMAN</b> | Microfibril-associated glycoprotein 3                        | MFAP3   | Unclassified  |
| <b>PAR2_HUMAN</b>  | Proteinase-activated receptor 2                              | F2RL1   | Receptors     |
| <b>AQP4_HUMAN</b>  | Aquaporin-4                                                  | AQP4    | Transporters  |
| <b>GP2_HUMAN</b>   | Pancreatic secretory granule membrane major glycoprotein GP2 | GP2     | Unclassified  |
| <b>CADH4_HUMAN</b> | Cadherin-4                                                   | CDH4    | Miscellaneous |
| <b>CADH6_HUMAN</b> | Cadherin-6                                                   | CDH6    | Miscellaneous |
| <b>CADH8_HUMAN</b> | Cadherin-8                                                   | CDH8    | Miscellaneous |
| <b>CAD11_HUMAN</b> | Cadherin-11                                                  | CDH11   | Miscellaneous |
| <b>CAD12_HUMAN</b> | Cadherin-12                                                  | CDH12   | Miscellaneous |
| <b>CAD13_HUMAN</b> | Cadherin-13                                                  | CDH13   | Miscellaneous |
| <b>CAD15_HUMAN</b> | Cadherin-15                                                  | CDH15   | Miscellaneous |
| <b>LMIP_HUMAN</b>  | Lens fiber membrane intrinsic protein                        | LIM2    | Miscellaneous |
| <b>FCGRN_HUMAN</b> | IgG receptor FcRn large subunit p51                          | FCGRT   | Receptors     |
| <b>GFRA1_HUMAN</b> | GDNF family receptor alpha-1                                 | GFRA1   |               |
| <b>ITA1_HUMAN</b>  | Integrin alpha-1                                             | ITGA1   | Receptors     |
| <b>P2RX3_HUMAN</b> | P2X purinoceptor 3                                           | P2RX3   | Transporters  |
| <b>CLD15_HUMAN</b> | Claudin-15                                                   | CLDN15  | Miscellaneous |
| <b>CLD6_HUMAN</b>  | Claudin-6                                                    | CLDN6   | Miscellaneous |
| <b>CLD8_HUMAN</b>  | Claudin-8                                                    | CLDN8   | Miscellaneous |
| <b>CLD12_HUMAN</b> | Claudin-12                                                   | CLDN12  | Miscellaneous |
| <b>BACE1_HUMAN</b> | Beta-secretase 1                                             | BACE1   | Enzymes       |
| <b>CLD18_HUMAN</b> | Claudin-18                                                   | CLDN18  | Miscellaneous |
| <b>CLD20_HUMAN</b> | Claudin-20                                                   | CLDN20  | Miscellaneous |
| <b>GLPT_HUMAN</b>  | Glycerol-3-phosphate transporter                             | SLC37A1 | Transporters  |
| <b>JAM2_HUMAN</b>  | Junctional adhesion molecule B                               | JAM2    | Miscellaneous |
| <b>NAC3_HUMAN</b>  | Sodium/calcium exchanger 3                                   | SLC8A3  | Transporters  |
| <b>CLD2_HUMAN</b>  | Claudin-2                                                    | CLDN2   | Miscellaneous |
| <b>OR1D5_HUMAN</b> | Olfactory receptor 1D5                                       | OR1D5   | Receptors     |
| <b>OR2B6_HUMAN</b> | Olfactory receptor 2B6                                       | OR2B6   | Receptors     |

|                    |                                                               |             |               |
|--------------------|---------------------------------------------------------------|-------------|---------------|
| <b>OR4D2_HUMAN</b> | Olfactory receptor 4D2                                        | OR4D2       | Receptors     |
| <b>O10A3_HUMAN</b> | Olfactory receptor 10A3                                       | OR10A3      | Receptors     |
| <b>O12D2_HUMAN</b> | Olfactory receptor 12D2                                       | OR12D2      | Receptors     |
| <b>ANTR2_HUMAN</b> | Anthrax toxin receptor 2                                      | ANTXR2      | Unclassified  |
| <b>NRX1B_HUMAN</b> | Neurexin-1-beta                                               | NRXN1       | Receptors     |
| <b>NRX2B_HUMAN</b> | Neurexin-2-beta                                               | NRXN2       | Receptors     |
| <b>CLRN1_HUMAN</b> | Clarin-1                                                      | CLRN1       | Unclassified  |
| <b>EVA1C_HUMAN</b> | Protein eva-1 homolog C                                       | EVA1C       | Unclassified  |
| <b>S26A5_HUMAN</b> | Prestin                                                       | SLC26A5     | Transporters  |
| <b>T2R38_HUMAN</b> | Taste receptor type 2 member 38                               | TAS2R38     | Receptors     |
| <b>T2R39_HUMAN</b> | Taste receptor type 2 member 39                               | TAS2R39     | Receptors     |
| <b>T2R46_HUMAN</b> | Taste receptor type 2 member 46                               | TAS2R46     | Receptors     |
| <b>T2R30_HUMAN</b> | Taste receptor type 2 member 30                               | TAS2R30     | Receptors     |
| <b>T2R19_HUMAN</b> | Taste receptor type 2 member 19                               | TAS2R19     | Receptors     |
| <b>T2R20_HUMAN</b> | Taste receptor type 2 member 20                               | TAS2R20     | Receptors     |
| <b>LIRA4_HUMAN</b> | Leukocyte immunoglobulin-like receptor subfamily A member 4   | LILRA4      | Receptors     |
| <b>OR2B8_HUMAN</b> | Putative olfactory receptor 2B8                               | OR2B8P      | Receptors     |
| <b>MYPR_HUMAN</b>  | Myelin proteolipid protein                                    | PLP1        | Unclassified  |
| <b>EFC1_HUMAN</b>  | Endogenous retrovirus group FC1 Env polyprotein               | ERVFC1      | Miscellaneous |
| <b>SYCY2_HUMAN</b> | Syncytin-2                                                    | ERVFRD-1    | Miscellaneous |
| <b>ERB1_HUMAN</b>  | Endogenous retrovirus group PABLB member 1 Env polyprotein    | ERV PABLB-1 | Miscellaneous |
| <b>ZP1_HUMAN</b>   | Zona pellucida sperm-binding protein 1                        | ZP1         | Unclassified  |
| <b>GPR85_HUMAN</b> | Probable G-protein coupled receptor 85                        | GPR85       | Receptors     |
| <b>CXCR4_HUMAN</b> | C-X-C chemokine receptor type 4                               | CXCR4       | Receptors     |
| <b>ENV71_HUMAN</b> | Endogenous retrovirus group S71 member 1 Env polyprotein      | ERV S71-1   | Miscellaneous |
| <b>ENK21_HUMAN</b> | Endogenous retrovirus group K member 21 Env polyprotein       | ERV K-21    | Miscellaneous |
| <b>ENK24_HUMAN</b> | Endogenous retrovirus group K member 24 Env polyprotein       | ERV K-24    | Miscellaneous |
| <b>ENK7_HUMAN</b>  | Endogenous retrovirus group K member 7 Env polyprotein        | ERV K-7     | Enzymes       |
| <b>ENK25_HUMAN</b> | Endogenous retrovirus group K member 25 Env polyprotein       | ERV K-25    | Miscellaneous |
| <b>TSN5_HUMAN</b>  | Tetraspanin-5                                                 | TSPAN5      | Miscellaneous |
| <b>CCG7_HUMAN</b>  | Voltage-dependent calcium channel gamma-7 subunit             | CACNG7      | Transporters  |
| <b>CXAR_HUMAN</b>  | Coxsackievirus and adenovirus receptor                        | CXADR       | Receptors     |
| <b>SHPS1_HUMAN</b> | Tyrosine-protein phosphatase non-receptor type substrate 1    | SIRPA       | Miscellaneous |
| <b>ADAM8_HUMAN</b> | Disintegrin and metalloproteinase domain-containing protein 8 | ADAM8       | Enzymes       |
| <b>GPC5_HUMAN</b>  | Glypican-5                                                    | GPC5        |               |
| <b>GBRE_HUMAN</b>  | Gamma-aminobutyric acid receptor subunit epsilon              | GABRE       | Transporters  |
| <b>ASIC1_HUMAN</b> | Acid-sensing ion channel 1                                    | ASIC1       | Unclassified  |
| <b>CNTP1_HUMAN</b> | Contactin-associated protein 1                                | CNTNAP1     | Receptors     |
| <b>ABCA4_HUMAN</b> | Retinal-specific ATP-binding cassette transporter             | ABCA4       | Transporters  |
| <b>CLD10_HUMAN</b> | Claudin-10                                                    | CLDN10      | Miscellaneous |

|                    |                                                                |          |               |
|--------------------|----------------------------------------------------------------|----------|---------------|
| <b>OLR1_HUMAN</b>  | Oxidized low-density lipoprotein receptor 1                    | OLR1     | Receptors     |
| <b>BT3A2_HUMAN</b> | Butyrophilin subfamily 3 member A2                             | BTN3A2   | Miscellaneous |
| <b>X3CL1_HUMAN</b> | Fractalkine                                                    | CX3CL1   | Unclassified  |
| <b>JAG1_HUMAN</b>  | Protein jagged-1                                               | JAG1     | Miscellaneous |
| <b>ADA17_HUMAN</b> | Disintegrin and metalloproteinase domain-containing protein 17 | ADAM17   | Enzymes       |
| <b>IL3R1_HUMAN</b> | Interleukin-13 receptor subunit alpha-1                        | IL13RA1  | Receptors     |
| <b>PHEX_HUMAN</b>  | Phosphate-regulating neutral endopeptidase                     | PHEX     | Enzymes       |
| <b>DRB3_HUMAN</b>  | HLA class II histocompatibility antigen, DR beta 3 chain       | HLA-DRB3 | Miscellaneous |
| <b>DLK1_HUMAN</b>  | Protein delta homolog 1                                        | DLK1     | Miscellaneous |
| <b>F189B_HUMAN</b> | Protein FAM189B                                                | FAM189B  | Unclassified  |
| <b>BAT1_HUMAN</b>  | b(0,+)-type amino acid transporter 1                           | SLC7A9   | Transporters  |
| <b>CRUM1_HUMAN</b> | Protein crumbs homolog 1                                       | CRB1     | Miscellaneous |
| <b>ENTK_HUMAN</b>  | Enteropeptidase                                                | TMPRSS15 | Enzymes       |
| <b>IDD_HUMAN</b>   | Integral membrane protein DGCR2/IDD                            | DGCR2    | Receptors     |
| <b>VLDLR_HUMAN</b> | Very low-density lipoprotein receptor                          | VLDLR    | Receptors     |
| <b>PKD1_HUMAN</b>  | Polycystin-1                                                   | PKD1     | Transporters  |
| <b>LRP2_HUMAN</b>  | Low-density lipoprotein receptor-related protein 2             | LRP2     | Receptors     |
| <b>EFNB1_HUMAN</b> | Ephrin-B1                                                      | EFNB1    | Miscellaneous |
| <b>IL9R_HUMAN</b>  | Interleukin-9 receptor                                         | IL9R     | Receptors     |
| <b>SCN7A_HUMAN</b> | Sodium channel protein type 7 subunit alpha                    | SCN7A    | Transporters  |
| <b>CD83_HUMAN</b>  | CD83 antigen                                                   | CD83     | Unclassified  |
| <b>IL5RA_HUMAN</b> | Interleukin-5 receptor subunit alpha                           | IL5RA    | Receptors     |
| <b>ILRL1_HUMAN</b> | Interleukin-1 receptor-like 1                                  | IL1RL1   | Receptors     |
| <b>LAT1_HUMAN</b>  | Large neutral amino acids transporter small subunit 1          | SLC7A5   | Transporters  |
| <b>ACTHR_HUMAN</b> | Adrenocorticotrophic hormone receptor                          | MC2R     | Receptors     |
| <b>MSHR_HUMAN</b>  | Melanocyte-stimulating hormone receptor                        | MC1R     | Receptors     |
| <b>AT2B2_HUMAN</b> | Plasma membrane calcium-transporting ATPase 2                  | ATP2B2   | Transporters  |
| <b>SC6A3_HUMAN</b> | Sodium-dependent dopamine transporter                          | SLC6A3   | Transporters  |
| <b>ROR1_HUMAN</b>  | Tyrosine-protein kinase transmembrane receptor ROR1            | ROR1     | Receptors     |
| <b>ROR2_HUMAN</b>  | Tyrosine-protein kinase transmembrane receptor ROR2            | ROR2     | Receptors     |
| <b>RHAG_HUMAN</b>  | Ammonium transporter Rh type A                                 | RHAG     | Transporters  |
| <b>TNR17_HUMAN</b> | Tumor necrosis factor receptor superfamily member 17           | TNFRSF17 | Receptors     |
| <b>CNTN2_HUMAN</b> | Contactin-2                                                    | CNTN2    | Unclassified  |
| <b>NRG1_HUMAN</b>  | Pro-neuregulin-1, membrane-bound isoform                       | NRG1     | Unclassified  |
| <b>DSG1_HUMAN</b>  | Desmoglein-1                                                   | DSG1     | Miscellaneous |
| <b>DSC2_HUMAN</b>  | Desmocollin-2                                                  | DSC2     | Miscellaneous |
| <b>MUC3A_HUMAN</b> | Mucin-3A                                                       | MUC3A    | Unclassified  |
| <b>GHRHR_HUMAN</b> | Growth hormone-releasing hormone receptor                      | GHRHR    | Receptors     |
| <b>TIE2_HUMAN</b>  | Angiopoietin-1 receptor                                        | TEK      | Receptors     |
| <b>TGFR3_HUMAN</b> | Transforming growth factor beta receptor type 3                | TGFR3    | Unclassified  |



|              |                                                                  |          |               |
|--------------|------------------------------------------------------------------|----------|---------------|
| UPAR_HUMAN   | Urokinase plasminogen activator surface receptor                 | PLAUR    |               |
| PTH1R_HUMAN  | Parathyroid hormone/parathyroid hormone-related peptide receptor | PTH1R    | Receptors     |
| FOLH1_HUMAN  | Glutamate carboxypeptidase 2                                     | FOLH1    | Enzymes       |
| NOTCH2_HUMAN | Neurogenic locus notch homolog protein 2                         | NOTCH2   | Receptors     |
| ACVR1_HUMAN  | Activin receptor type-1                                          | ACVR1    | Receptors     |
| 1B40_HUMAN   | HLA class I histocompatibility antigen, B-40 alpha chain         | HLA-B    | Miscellaneous |
| ACHE_HUMAN   | Acetylcholine receptor subunit epsilon                           | CHRNE    | Transporters  |
| MUC24_HUMAN  | Sialomucin core protein 24                                       | CD164    | Unclassified  |
| RON_HUMAN    | Macrophage-stimulating protein receptor                          | MST1R    | Receptors     |
| NMDZ1_HUMAN  | Glutamate receptor ionotropic, NMDA 1                            | GRIN1    | Transporters  |
| ACHB3_HUMAN  | Neuronal acetylcholine receptor subunit beta-3                   | CHRNA3   | Transporters  |
| VMAT2_HUMAN  | Synaptic vesicular amine transporter                             | SLC18A2  | Transporters  |
| ZP2_HUMAN    | Zona pellucida sperm-binding protein 2                           | ZP2      | Unclassified  |
| TYRO3_HUMAN  | Tyrosine-protein kinase receptor TYRO3                           | TYRO3    | Receptors     |
| CCG1_HUMAN   | Voltage-dependent calcium channel gamma-1 subunit                | CACNG1   | Transporters  |
| APLP2_HUMAN  | Amyloid-like protein 2                                           | APLP2    | Unclassified  |
| NPT2A_HUMAN  | Sodium-dependent phosphate transport protein 2A                  | SLC34A1  | Transporters  |
| 1C15_HUMAN   | HLA class I histocompatibility antigen, Cw-15 alpha chain        | HLA-C    | Miscellaneous |
| ACHD_HUMAN   | Acetylcholine receptor subunit delta                             | CHRND    | Transporters  |
| TNR9_HUMAN   | Tumor necrosis factor receptor superfamily member 9              | TNFRSF9  | Receptors     |
| AMPE_HUMAN   | Glutamyl aminopeptidase                                          | ENPEP    | Enzymes       |
| CD69_HUMAN   | Early activation antigen CD69                                    | CD69     | Receptors     |
| NKG2E_HUMAN  | NKG2-E type II integral membrane protein                         | KLRC3    | Receptors     |
| SCN1B_HUMAN  | Sodium channel subunit beta-1                                    | SCN1B    | Transporters  |
| SLC31_HUMAN  | Neutral and basic amino acid transport protein rBAT              | SLC3A1   | Transporters  |
| LRP1_HUMAN   | Prolow-density lipoprotein receptor-related protein 1            | LRP1     | Receptors     |
| PCDH1_HUMAN  | Protocadherin-1                                                  | PCDH1    | Miscellaneous |
| IL10R2_HUMAN | Interleukin-10 receptor subunit beta                             | IL10RB   | Receptors     |
| DDR1_HUMAN   | Epithelial discoidin domain-containing receptor 1                | DDR1     | Receptors     |
| S20A2_HUMAN  | Sodium-dependent phosphate transporter 2                         | SLC20A2  | Transporters  |
| ADCY2_HUMAN  | Adenylate cyclase type 2                                         | ADCY2    | Enzymes       |
| DSC1_HUMAN   | Desmocollin-1                                                    | DSC1     | Miscellaneous |
| CLM6_HUMAN   | CMRF35-like molecule 6                                           | CD300C   | Receptors     |
| CD47_HUMAN   | Leukocyte surface antigen CD47                                   | CD47     | Unclassified  |
| S38AB_HUMAN  | Putative sodium-coupled neutral amino acid transporter 11        | SLC38A11 | Transporters  |
| SIG14_HUMAN  | Sialic acid-binding Ig-like lectin 14                            | SIGLEC14 | Miscellaneous |
| 1A80_HUMAN   | HLA class I histocompatibility antigen, A-80 alpha chain         | HLA-A    | Miscellaneous |
| NIPA4_HUMAN  | Magnesium transporter NIPA4                                      | NIPAL4   | Transporters  |
| TMM62_HUMAN  | Transmembrane protein 62                                         | TMEM62   | Unclassified  |
| BST1_HUMAN   | ADP-ribosyl cyclase/cyclic ADP-ribose hydrolase 2                | BST1     |               |

|                     |                                                                       |         |               |
|---------------------|-----------------------------------------------------------------------|---------|---------------|
| <b>BST2_HUMAN</b>   | Bone marrow stromal antigen 2                                         | BST2    | Unclassified  |
| <b>SCAP_HUMAN</b>   | Sterol regulatory element-binding protein cleavage-activating protein | SCAP    | Unclassified  |
| <b>ZP4_HUMAN</b>    | Zona pellucida sperm-binding protein 4                                | ZP4     | Unclassified  |
| <b>CNTN1_HUMAN</b>  | Contactin-1                                                           | CNTN1   | Unclassified  |
| <b>CAD17_HUMAN</b>  | Cadherin-17                                                           | CDH17   | Miscellaneous |
| <b>MERTK_HUMAN</b>  | Tyrosine-protein kinase Mer                                           | MERTK   | Receptors     |
| <b>NMDE1_HUMAN</b>  | Glutamate receptor ionotropic, NMDA 2A                                | GRIN2A  | Transporters  |
| <b>SEPR_HUMAN</b>   | Prolyl endopeptidase FAP                                              | FAP     |               |
| <b>HYAL2_HUMAN</b>  | Hyaluronidase-2                                                       | HYAL2   |               |
| <b>LMAN2_HUMAN</b>  | Vesicular integral-membrane protein VIP36                             | LMAN2   | Unclassified  |
| <b>NTCP2_HUMAN</b>  | Ileal sodium/bile acid cotransporter                                  | SLC10A2 | Transporters  |
| <b>PTPRJ_HUMAN</b>  | Receptor-type tyrosine-protein phosphatase eta                        | PTPRJ   | Receptors     |
| <b>KLRB1_HUMAN</b>  | Killer cell lectin-like receptor subfamily B member 1                 | KLRB1   | Receptors     |
| <b>TSN31_HUMAN</b>  | Tetraspanin-31                                                        | TSPAN31 | Miscellaneous |
| <b>GRIK2_HUMAN</b>  | Glutamate receptor ionotropic, kainate 2                              | GRIK2   | Transporters  |
| <b>GRIK3_HUMAN</b>  | Glutamate receptor ionotropic, kainate 3                              | GRIK3   | Transporters  |
| <b>PLA2R_HUMAN</b>  | Secretory phospholipase A2 receptor                                   | PLA2R1  | Receptors     |
| <b>BAMBI_HUMAN</b>  | BMP and activin membrane-bound inhibitor homolog                      | BAMBI   | Unclassified  |
| <b>S13A2_HUMAN</b>  | Solute carrier family 13 member 2                                     | SLC13A2 | Transporters  |
| <b>NMDE2_HUMAN</b>  | Glutamate receptor ionotropic, NMDA 2B                                | GRIN2B  | Transporters  |
| <b>GRM1_HUMAN</b>   | Metabotropic glutamate receptor 1                                     | GRM1    | Receptors     |
| <b>PD2R_HUMAN</b>   | Prostaglandin D2 receptor                                             | PTGDR   | Receptors     |
| <b>IL15RA_HUMAN</b> | Interleukin-15 receptor subunit alpha                                 | IL15RA  | Receptors     |
| <b>CLN3_HUMAN</b>   | Battenin                                                              | CLN3    | Unclassified  |
| <b>SLAF1_HUMAN</b>  | Signaling lymphocytic activation molecule                             | SLAMF1  | Unclassified  |
| <b>GPR17_HUMAN</b>  | Uracil nucleotide/cysteinyl leukotriene receptor                      | GPR17   | Receptors     |
| <b>PTK7_HUMAN</b>   | Inactive tyrosine-protein kinase 7                                    | PTK7    | Receptors     |
| <b>CRFR2_HUMAN</b>  | Corticotropin-releasing factor receptor 2                             | CRHR2   | Receptors     |
| <b>PTPRS_HUMAN</b>  | Receptor-type tyrosine-protein phosphatase S                          | PTPRS   | Receptors     |
| <b>UT1_HUMAN</b>    | Urea transporter 1                                                    | SLC14A1 | Transporters  |
| <b>ITAD_HUMAN</b>   | Integrin alpha-D                                                      | ITGAD   | Receptors     |
| <b>BT1A1_HUMAN</b>  | Butyrophilin subfamily 1 member A1                                    | BTN1A1  | Miscellaneous |
| <b>MSLN_HUMAN</b>   | Mesothelin                                                            | MSLN    |               |
| <b>S39A6_HUMAN</b>  | Zinc transporter ZIP6                                                 | SLC39A6 | Transporters  |
| <b>ADAM9_HUMAN</b>  | Disintegrin and metalloproteinase domain-containing protein 9         | ADAM9   | Enzymes       |
| <b>ADA15_HUMAN</b>  | Disintegrin and metalloproteinase domain-containing protein 15        | ADAM15  | Enzymes       |
| <b>LSAMP_HUMAN</b>  | Limbic system-associated membrane protein                             | LSAMP   | Unclassified  |
| <b>FZD5_HUMAN</b>   | Frizzled-5                                                            | FZD5    | Receptors     |
| <b>IL18R_HUMAN</b>  | Interleukin-18 receptor 1                                             | IL18R1  | Receptors     |
| <b>VPP3_HUMAN</b>   | V-type proton ATPase 116 kDa subunit a isoform 3                      | TCIRG1  | Unclassified  |

|                      |                                                               |         |               |
|----------------------|---------------------------------------------------------------|---------|---------------|
| <b>GPM6B_HUMAN</b>   | Neuronal membrane glycoprotein M6-b                           | GPM6B   | Unclassified  |
| <b>NAR3_HUMAN</b>    | Ecto-ADP-ribosyltransferase 3                                 | ART3    | Enzymes       |
| <b>SERC3_HUMAN</b>   | Serine incorporator 3                                         | SERINC3 | Transporters  |
| <b>PKD2_HUMAN</b>    | Polycystin-2                                                  | PKD2    | Transporters  |
| <b>MTR1L_HUMAN</b>   | Melatonin-related receptor                                    | GPR50   | Receptors     |
| <b>STIM1_HUMAN</b>   | Stromal interaction molecule 1                                | STIM1   | Unclassified  |
| <b>SEM5A_HUMAN</b>   | Semaphorin-5A                                                 | SEMA5A  | Miscellaneous |
| <b>OR51I_HUMAN</b>   | Olfactory receptor 51I                                        | OR51I   | Receptors     |
| <b>OR2F1_HUMAN</b>   | Olfactory receptor 2F1                                        | OR2F1   | Receptors     |
| <b>SLC12A1_HUMAN</b> | Solute carrier family 12 member 1                             | SLC12A1 | Transporters  |
| <b>CAD18_HUMAN</b>   | Cadherin-18                                                   | CDH18   | Miscellaneous |
| <b>PTCH1_HUMAN</b>   | Protein patched homolog 1                                     | PTCH1   | Receptors     |
| <b>5HT4R_HUMAN</b>   | 5-hydroxytryptamine receptor 4                                | HTR4    | Receptors     |
| <b>TPBG_HUMAN</b>    | Trophoblast glycoprotein                                      | TPBG    | Miscellaneous |
| <b>IL10R1_HUMAN</b>  | Interleukin-10 receptor subunit alpha                         | IL10RA  | Receptors     |
| <b>ITGA7_HUMAN</b>   | Integrin alpha-7                                              | ITGA7   | Receptors     |
| <b>ACVR2B_HUMAN</b>  | Activin receptor type-2B                                      | ACVR2B  | Receptors     |
| <b>ATP1A4_HUMAN</b>  | Sodium/potassium-transporting ATPase subunit alpha-4          | ATP1A4  | Transporters  |
| <b>CD166_HUMAN</b>   | CD166 antigen                                                 | ALCAM   | Unclassified  |
| <b>ITGA9_HUMAN</b>   | Integrin alpha-9                                              | ITGA9   | Receptors     |
| <b>BMPR2_HUMAN</b>   | Bone morphogenetic protein receptor type-2                    | BMPR2   | Receptors     |
| <b>CACNA1C_HUMAN</b> | Voltage-dependent L-type calcium channel subunit alpha-1C     | CACNA1C | Transporters  |
| <b>CEACAM7_HUMAN</b> | Carcinoembryonic antigen-related cell adhesion molecule 7     | CEACAM7 | Miscellaneous |
| <b>SCARB2_HUMAN</b>  | Lysosome membrane protein 2                                   | SCARB2  | Receptors     |
| <b>LRP8_HUMAN</b>    | Low-density lipoprotein receptor-related protein 8            | LRP8    | Receptors     |
| <b>DAG1_HUMAN</b>    | Dystroglycan                                                  | DAG1    | Unclassified  |
| <b>DSG2_HUMAN</b>    | Desmoglein-2                                                  | DSG2    | Miscellaneous |
| <b>SRECF1_HUMAN</b>  | Scavenger receptor class F member 1                           | SCARF1  | Receptors     |
| <b>LY6D_HUMAN</b>    | Lymphocyte antigen 6D                                         | LY6D    | Unclassified  |
| <b>SELPLG_HUMAN</b>  | P-selectin glycoprotein ligand 1                              | SELPLG  | Unclassified  |
| <b>EMR1_HUMAN</b>    | EGF-like module-containing mucin-like hormone receptor-like 1 | EMR1    | Receptors     |
| <b>GPR18_HUMAN</b>   | N-arachidonyl glycine receptor                                | GPR18   | Receptors     |
| <b>FZD2_HUMAN</b>    | Frizzled-2                                                    | FZD2    | Receptors     |
| <b>LRRC32_HUMAN</b>  | Leucine-rich repeat-containing protein 32                     | LRRC32  | Miscellaneous |
| <b>GRM2_HUMAN</b>    | Metabotropic glutamate receptor 2                             | GRM2    | Receptors     |
| <b>GPR176_HUMAN</b>  | Probable G-protein coupled receptor 176                       | GPR176  | Receptors     |
| <b>KCNJ12_HUMAN</b>  | ATP-sensitive inward rectifier potassium channel 12           | KCNJ12  | Transporters  |
| <b>FAT1_HUMAN</b>    | Protocadherin Fat 1                                           | FAT1    | Miscellaneous |
| <b>SCN5A_HUMAN</b>   | Sodium channel protein type 5 subunit alpha                   | SCN5A   | Transporters  |
| <b>SLC29A2_HUMAN</b> | Equilibrative nucleoside transporter 2                        | SLC29A2 | Transporters  |

|                     |                                                      |          |               |
|---------------------|------------------------------------------------------|----------|---------------|
| <b>DSC3_HUMAN</b>   | Desmocollin-3                                        | DSC3     | Miscellaneous |
| <b>IL1RA_HUMAN</b>  | Interleukin-11 receptor subunit alpha                | IL11RA   | Receptors     |
| <b>IL13R2_HUMAN</b> | Interleukin-13 receptor subunit alpha-2              | IL13RA2  | Receptors     |
| <b>SSPN_HUMAN</b>   | Sarcospan                                            | SSPN     | Unclassified  |
| <b>ICAM4_HUMAN</b>  | Intercellular adhesion molecule 4                    | ICAM4    | Unclassified  |
| <b>GRM7_HUMAN</b>   | Metabotropic glutamate receptor 7                    | GRM7     | Receptors     |
| <b>GRM3_HUMAN</b>   | Metabotropic glutamate receptor 3                    | GRM3     | Receptors     |
| <b>GRM4_HUMAN</b>   | Metabotropic glutamate receptor 4                    | GRM4     | Receptors     |
| <b>NPT1_HUMAN</b>   | Sodium-dependent phosphate transport protein 1       | SLC17A1  | Transporters  |
| <b>KI3S1_HUMAN</b>  | Killer cell immunoglobulin-like receptor 3DS1        | KIR3DS1  | Receptors     |
| <b>KI2S3_HUMAN</b>  | Killer cell immunoglobulin-like receptor 2DS3        | KIR2DS3  | Receptors     |
| <b>KI2S5_HUMAN</b>  | Killer cell immunoglobulin-like receptor 2DS5        | KIR2DS5  | Receptors     |
| <b>KI2S1_HUMAN</b>  | Killer cell immunoglobulin-like receptor 2DS1        | KIR2DS1  | Receptors     |
| <b>GPNMB_HUMAN</b>  | Transmembrane glycoprotein NMB                       | GPNMB    | Unclassified  |
| <b>NMDE3_HUMAN</b>  | Glutamate receptor ionotropic, NMDA 2C               | GRIN2C   | Transporters  |
| <b>NTCP_HUMAN</b>   | Sodium/bile acid cotransporter                       | SLC10A1  | Transporters  |
| <b>OPCM_HUMAN</b>   | Opioid-binding protein/cell adhesion molecule        | OPCML    | Unclassified  |
| <b>T132D_HUMAN</b>  | Transmembrane protein 132D                           | TMEM132D | Miscellaneous |
| <b>CLCA4_HUMAN</b>  | Calcium-activated chloride channel regulator 4       | CLCA4    | Unclassified  |
| <b>HECAM_HUMAN</b>  | Hepatocyte cell adhesion molecule                    | HEPACAM  | Unclassified  |
| <b>T132B_HUMAN</b>  | Transmembrane protein 132B                           | TMEM132B | Miscellaneous |
| <b>S39AE_HUMAN</b>  | Zinc transporter ZIP14                               | SLC39A14 |               |
| <b>P2RY6_HUMAN</b>  | P2Y purinoceptor 6                                   | P2RY6    | Receptors     |
| <b>RAGE_HUMAN</b>   | Advanced glycosylation end product-specific receptor | AGER     | Receptors     |
| <b>PDCD1_HUMAN</b>  | Programmed cell death protein 1                      | PDCD1    | Unclassified  |
| <b>EBP_HUMAN</b>    | 3-beta-hydroxysteroid-Delta(8),Delta(7)-isomerase    | EBP      | Enzymes       |
| <b>PVRL1_HUMAN</b>  | Nectin-1                                             | PVRL1    | Receptors     |
| <b>PTPRR_HUMAN</b>  | Receptor-type tyrosine-protein phosphatase R         | PTPRR    | Receptors     |
| <b>PTPRK_HUMAN</b>  | Receptor-type tyrosine-protein phosphatase kappa     | PTPRK    | Receptors     |
| <b>ERBB4_HUMAN</b>  | Receptor tyrosine-protein kinase erbB-4              | ERBB4    | Receptors     |
| <b>EPHA7_HUMAN</b>  | Ephrin type-A receptor 7                             | EPHA7    | Receptors     |
| <b>P2Y14_HUMAN</b>  | P2Y purinoceptor 14                                  | P2RY14   | Receptors     |
| <b>TLR1_HUMAN</b>   | Toll-like receptor 1                                 | TLR1     | Receptors     |
| <b>OR1Q1_HUMAN</b>  | Olfactory receptor 1Q1                               | OR1Q1    | Receptors     |
| <b>OR8G2_HUMAN</b>  | Olfactory receptor 8G2                               | OR8G2    | Receptors     |
| <b>OR4D1_HUMAN</b>  | Olfactory receptor 4D1                               | OR4D1    | Receptors     |
| <b>OR8G1_HUMAN</b>  | Olfactory receptor 8G1                               | OR8G1    | Receptors     |
| <b>OR1C1_HUMAN</b>  | Olfactory receptor 1C1                               | OR1C1    | Receptors     |
| <b>OR8B8_HUMAN</b>  | Olfactory receptor 8B8                               | OR8B8    | Receptors     |
| <b>OR7A5_HUMAN</b>  | Olfactory receptor 7A5                               | OR7A5    | Receptors     |

|                    |                                                       |         |               |
|--------------------|-------------------------------------------------------|---------|---------------|
| <b>LT4R1_HUMAN</b> | Leukotriene B4 receptor 1                             | LTB4R   | Receptors     |
| <b>OGR1_HUMAN</b>  | Ovarian cancer G-protein coupled receptor 1           | GPR68   | Receptors     |
| <b>AAAT_HUMAN</b>  | Neutral amino acid transporter B(0)                   | SLC1A5  | Transporters  |
| <b>GPR19_HUMAN</b> | Probable G-protein coupled receptor 19                | GPR19   | Receptors     |
| <b>NPY5R_HUMAN</b> | Neuropeptide Y receptor type 5                        | NPY5R   | Receptors     |
| <b>CD226_HUMAN</b> | CD226 antigen                                         | CD226   | Receptors     |
| <b>EFNB3_HUMAN</b> | Ephrin-B3                                             | EFNB3   | Miscellaneous |
| <b>ACHA2_HUMAN</b> | Neuronal acetylcholine receptor subunit alpha-2       | CHRNA2  | Transporters  |
| <b>ACHA6_HUMAN</b> | Neuronal acetylcholine receptor subunit alpha-6       | CHRNA6  | Transporters  |
| <b>UT2_HUMAN</b>   | Urea transporter 2                                    | SLC14A2 | Transporters  |
| <b>SCN9A_HUMAN</b> | Sodium channel protein type 9 subunit alpha           | SCN9A   | Transporters  |
| <b>GRIK4_HUMAN</b> | Glutamate receptor ionotropic, kainate 4              | GRIK4   | Transporters  |
| <b>NTRK3_HUMAN</b> | NT-3 growth factor receptor                           | NTRK3   | Receptors     |
| <b>S15A2_HUMAN</b> | Solute carrier family 15 member 2                     | SLC15A2 | Transporters  |
| <b>GBRA6_HUMAN</b> | Gamma-aminobutyric acid receptor subunit alpha-6      | GABRA6  | Transporters  |
| <b>GRIK5_HUMAN</b> | Glutamate receptor ionotropic, kainate 5              | GRIK5   | Transporters  |
| <b>GP162_HUMAN</b> | Probable G-protein coupled receptor 162               | GPR162  | Receptors     |
| <b>LY6E_HUMAN</b>  | Lymphocyte antigen 6E                                 | LY6E    | Unclassified  |
| <b>KCMB1_HUMAN</b> | Calcium-activated potassium channel subunit beta-1    | KCNMB1  | Transporters  |
| <b>SYPL1_HUMAN</b> | Synaptophysin-like protein 1                          | SYPL1   | Miscellaneous |
| <b>ACKR1_HUMAN</b> | Atypical chemokine receptor 1                         | ACKR1   | Receptors     |
| <b>VACHT_HUMAN</b> | Vesicular acetylcholine transporter                   | SLC18A3 | Transporters  |
| <b>C3AR_HUMAN</b>  | C3a anaphylatoxin chemotactic receptor                | C3AR1   | Receptors     |
| <b>SGCB_HUMAN</b>  | Beta-sarcoglycan                                      | SGCB    | Miscellaneous |
| <b>SGCA_HUMAN</b>  | Alpha-sarcoglycan                                     | SGCA    | Miscellaneous |
| <b>CALRL_HUMAN</b> | Calcitonin gene-related peptide type 1 receptor       | CALCRL  | Receptors     |
| <b>NTRK2_HUMAN</b> | BDNF/NT-3 growth factors receptor                     | NTRK2   | Receptors     |
| <b>PRSS8_HUMAN</b> | Prostasin                                             | PRSS8   | Unclassified  |
| <b>MOG_HUMAN</b>   | Myelin-oligodendrocyte glycoprotein                   | MOG     | Unclassified  |
| <b>AMHR2_HUMAN</b> | Anti-Muellerian hormone type-2 receptor               | AMHR2   | Receptors     |
| <b>AT2B3_HUMAN</b> | Plasma membrane calcium-transporting ATPase 3         | ATP2B3  | Transporters  |
| <b>MEP1A_HUMAN</b> | Meprin A subunit alpha                                | MEP1A   | Enzymes       |
| <b>MEP1B_HUMAN</b> | Meprin A subunit beta                                 | MEP1B   | Enzymes       |
| <b>PTPRO_HUMAN</b> | Receptor-type tyrosine-protein phosphatase O          | PTPRO   | Receptors     |
| <b>DDR2_HUMAN</b>  | Discoidin domain-containing receptor 2                | DDR2    | Receptors     |
| <b>PTPRN_HUMAN</b> | Receptor-type tyrosine-protein phosphatase-like N     | PTPRN   | Receptors     |
| <b>AOC3_HUMAN</b>  | Membrane primary amine oxidase                        | AOC3    |               |
| <b>CGT_HUMAN</b>   | 2-hydroxyacylsphingosine 1-beta-galactosyltransferase | UGT8    | Enzymes       |
| <b>F187B_HUMAN</b> | Protein FAM187B                                       | FAM187B | Unclassified  |
| <b>LY6K_HUMAN</b>  | Lymphocyte antigen 6K                                 | LY6K    | Unclassified  |

|                    |                                                                                               |          |               |
|--------------------|-----------------------------------------------------------------------------------------------|----------|---------------|
| <b>ECSCR_HUMAN</b> | Endothelial cell-specific chemotaxis regulator                                                | ECSCR    |               |
| <b>SC5AC_HUMAN</b> | Sodium-coupled monocarboxylate transporter 2                                                  | SLC5A12  | Transporters  |
| <b>DOXA1_HUMAN</b> | Dual oxidase maturation factor 1                                                              | DUOXA1   | Unclassified  |
| <b>T132A_HUMAN</b> | Transmembrane protein 132A                                                                    | TMEM132A | Miscellaneous |
| <b>1B82_HUMAN</b>  | HLA class I histocompatibility antigen, B-82 alpha chain                                      | HLA-B    | Miscellaneous |
| <b>1B67_HUMAN</b>  | HLA class I histocompatibility antigen, B-67 alpha chain                                      | HLA-B    | Miscellaneous |
| <b>1C18_HUMAN</b>  | HLA class I histocompatibility antigen, Cw-18 alpha chain                                     | HLA-C    | Miscellaneous |
| <b>1B59_HUMAN</b>  | HLA class I histocompatibility antigen, B-59 alpha chain                                      | HLA-B    | Miscellaneous |
| <b>1C16_HUMAN</b>  | HLA class I histocompatibility antigen, Cw-16 alpha chain                                     | HLA-C    | Miscellaneous |
| <b>1C06_HUMAN</b>  | HLA class I histocompatibility antigen, Cw-6 alpha chain                                      | HLA-C    | Miscellaneous |
| <b>2B1G_HUMAN</b>  | HLA class II histocompatibility antigen, DRB1-16 beta chain                                   | HLA-DRB1 | Miscellaneous |
| <b>MICB_HUMAN</b>  | MHC class I polypeptide-related sequence B                                                    | MICB     | Miscellaneous |
| <b>MICA_HUMAN</b>  | MHC class I polypeptide-related sequence A                                                    | MICA     | Miscellaneous |
| <b>CL12B_HUMAN</b> | C-type lectin domain family 12 member B                                                       | CLEC12B  | Receptors     |
| <b>GSG1_HUMAN</b>  | Germ cell-specific gene 1 protein                                                             | GSG1     | Unclassified  |
| <b>MPEG1_HUMAN</b> | Macrophage-expressed gene 1 protein                                                           | MPEG1    | Unclassified  |
| <b>ABCB5_HUMAN</b> | ATP-binding cassette sub-family B member 5                                                    | ABCB5    | Transporters  |
| <b>SC5A9_HUMAN</b> | Sodium/glucose cotransporter 4                                                                | SLC5A9   | Transporters  |
| <b>PRTG_HUMAN</b>  | Protogenin                                                                                    | PRTG     | Receptors     |
| <b>S4A8_HUMAN</b>  | Electroneutral sodium bicarbonate exchanger 1                                                 | SLC4A8   | Transporters  |
| <b>2B18_HUMAN</b>  | HLA class II histocompatibility antigen, DRB1-8 beta chain                                    | HLA-DRB1 | Miscellaneous |
| <b>DRB5_HUMAN</b>  | HLA class II histocompatibility antigen, DR beta 5 chain                                      | HLA-DRB5 | Miscellaneous |
| <b>2B1A_HUMAN</b>  | HLA class II histocompatibility antigen, DRB1-10 beta chain                                   | HLA-DRB1 | Miscellaneous |
| <b>HFE_HUMAN</b>   | Hereditary hemochromatosis protein                                                            | HFE      | Unclassified  |
| <b>1B81_HUMAN</b>  | HLA class I histocompatibility antigen, B-81 alpha chain                                      | HLA-B    | Miscellaneous |
| <b>1B73_HUMAN</b>  | HLA class I histocompatibility antigen, B-73 alpha chain                                      | HLA-B    | Miscellaneous |
| <b>LPPR5_HUMAN</b> | Lipid phosphate phosphatase-related protein type 5                                            | LPPR5    | Enzymes       |
| <b>PTHD3_HUMAN</b> | Patched domain-containing protein 3                                                           | PTCHD3   | Unclassified  |
| <b>TMM95_HUMAN</b> | Transmembrane protein 95                                                                      | TMEM95   | Unclassified  |
| <b>SOAT_HUMAN</b>  | Solute carrier family 10 member 6                                                             | SLC10A6  | Transporters  |
| <b>CEA21_HUMAN</b> | Carcinoembryonic antigen-related cell adhesion molecule 21                                    | CEACAM21 | Miscellaneous |
| <b>GRM1B_HUMAN</b> | GRAM domain-containing protein 1B                                                             | GRAMD1B  | Unclassified  |
| <b>DPCR1_HUMAN</b> | Diffuse panbronchiolitis critical region protein 1                                            | DPCR1    | Unclassified  |
| <b>K1644_HUMAN</b> | Uncharacterized protein KIAA1644                                                              | KIAA1644 | Unclassified  |
| <b>LRIT3_HUMAN</b> | Leucine-rich repeat, immunoglobulin-like domain and transmembrane domain-containing protein 3 | LRIT3    | Miscellaneous |
| <b>F174B_HUMAN</b> | Membrane protein FAM174B                                                                      | FAM174B  | Unclassified  |
| <b>ZACN_HUMAN</b>  | Zinc-activated ligand-gated ion channel                                                       | ZACN     | Transporters  |
| <b>TIGIT_HUMAN</b> | T-cell immunoreceptor with Ig and ITIM domains                                                | TIGIT    | Miscellaneous |
| <b>S36A2_HUMAN</b> | Proton-coupled amino acid transporter 2                                                       | SLC36A2  | Transporters  |
| <b>S36A3_HUMAN</b> | Proton-coupled amino acid transporter 3                                                       | SLC36A3  | Transporters  |

|                     |                                                                           |          |               |
|---------------------|---------------------------------------------------------------------------|----------|---------------|
| <b>MMEL1_HUMAN</b>  | Membrane metallo-endoropeptidase-like 1                                   | MMEL1    | Enzymes       |
| <b>CLM2_HUMAN</b>   | CMRF35-like molecule 2                                                    | CD300E   | Receptors     |
| <b>NRN1L_HUMAN</b>  | Neuritin-like protein                                                     | NRN1L    |               |
| <b>SV2C_HUMAN</b>   | Synaptic vesicle glycoprotein 2C                                          | SV2C     | Transporters  |
| <b>GPR33_HUMAN</b>  | Probable G-protein coupled receptor 33                                    | GPR33    | Receptors     |
| <b>SRCRM_HUMAN</b>  | Scavenger receptor cysteine-rich domain-containing protein SCART1         |          | Unclassified  |
| <b>CDON_HUMAN</b>   | Cell adhesion molecule-related/down-regulated by oncogenes                | CDON     | Receptors     |
| <b>ANO6_HUMAN</b>   | Anoctamin-6                                                               | ANO6     | Miscellaneous |
| <b>NKAI1_HUMAN</b>  | Sodium/potassium-transporting ATPase subunit beta-1-interacting protein 1 | NKAIN1   | Transporters  |
| <b>S22A6_HUMAN</b>  | Solute carrier family 22 member 6                                         | SLC22A6  | Transporters  |
| <b>AT135_HUMAN</b>  | Probable cation-transporting ATPase 13A5                                  | ATP13A5  | Transporters  |
| <b>S39AC_HUMAN</b>  | Zinc transporter ZIP12                                                    | SLC39A12 | Transporters  |
| <b>LRC24_HUMAN</b>  | Leucine-rich repeat-containing protein 24                                 | LRRC24   | Miscellaneous |
| <b>SEZ6_HUMAN</b>   | Seizure protein 6 homolog                                                 | SEZ6     | Unclassified  |
| <b>CTL4_HUMAN</b>   | Choline transporter-like protein 4                                        | SLC44A4  | Transporters  |
| <b>T4SF20_HUMAN</b> | Transmembrane 4 L6 family member 20                                       | TM4SF20  | Miscellaneous |
| <b>SDK2_HUMAN</b>   | Protein sidekick-2                                                        | SDK2     | Miscellaneous |
| <b>SPRN_HUMAN</b>   | Shadow of prion protein                                                   | SPRN     |               |
| <b>S45A4_HUMAN</b>  | Solute carrier family 45 member 4                                         | SLC45A4  | Transporters  |
| <b>UROL1_HUMAN</b>  | Uromodulin-like 1                                                         | UMODL1   | Unclassified  |
| <b>IGS11_HUMAN</b>  | Immunoglobulin superfamily member 11                                      | IGSF11   | Receptors     |
| <b>PRRT3_HUMAN</b>  | Proline-rich transmembrane protein 3                                      | PRRT3    | Unclassified  |
| <b>XKR3_HUMAN</b>   | XK-related protein 3                                                      | XKR3     | Transporters  |
| <b>MKS3_HUMAN</b>   | Meckelin                                                                  | TMEM67   | Unclassified  |
| <b>CRUM2_HUMAN</b>  | Protein crumbs homolog 2                                                  | CRB2     | Miscellaneous |
| <b>OR2BB_HUMAN</b>  | Olfactory receptor 2B11                                                   | OR2B11   | Receptors     |
| <b>O10J3_HUMAN</b>  | Olfactory receptor 10J3                                                   | OR10J3   | Receptors     |
| <b>T255A_HUMAN</b>  | Transmembrane protein 255A                                                | TMEM255A | Unclassified  |
| <b>SIRB2_HUMAN</b>  | Signal-regulatory protein beta-2                                          | SIRPB2   | Miscellaneous |
| <b>GLRA4_HUMAN</b>  | Glycine receptor subunit alpha-4                                          | GLRA4    | Transporters  |
| <b>EPHAA_HUMAN</b>  | Ephrin type-A receptor 10                                                 | EPHA10   | Receptors     |
| <b>RNFT1_HUMAN</b>  | RING finger and transmembrane domain-containing protein 1                 | RNFT1    | Miscellaneous |
| <b>FFAR4_HUMAN</b>  | Free fatty acid receptor 4                                                | FFAR4    | Receptors     |
| <b>NTCP5_HUMAN</b>  | Sodium/bile acid cotransporter 5                                          | SLC10A5  | Transporters  |
| <b>CL12A_HUMAN</b>  | C-type lectin domain family 12 member A                                   | CLEC12A  | Receptors     |
| <b>PPR29_HUMAN</b>  | Protein phosphatase 1 regulatory subunit 29                               | ELFN2    | Miscellaneous |
| <b>LY66F_HUMAN</b>  | Lymphocyte antigen 6 complex locus protein G6f                            | LY6G6F   | Unclassified  |
| <b>MUC21_HUMAN</b>  | Mucin-21                                                                  | MUC21    | Unclassified  |
| <b>CA101_HUMAN</b>  | Uncharacterized protein C1orf101                                          | C1orf101 | Unclassified  |
| <b>FREM2_HUMAN</b>  | FRAS1-related extracellular matrix protein 2                              | FREM2    | Unclassified  |

|                     |                                                                           |          |               |
|---------------------|---------------------------------------------------------------------------|----------|---------------|
| <b>NCMAP_HUMAN</b>  | Noncompact myelin-associated protein                                      | NCMAP    | Unclassified  |
| <b>TRML2_HUMAN</b>  | Trem-like transcript 2 protein                                            | TREML2   | Receptors     |
| <b>CSC12_HUMAN</b>  | CSC1-like protein 2                                                       | TMEM63B  | Miscellaneous |
| <b>MRP7_HUMAN</b>   | Multidrug resistance-associated protein 7                                 | ABCC10   | Transporters  |
| <b>CXG2_HUMAN</b>   | Gap junction gamma-2 protein                                              | GJC2     | Miscellaneous |
| <b>ZFY27_HUMAN</b>  | Protrudin                                                                 | ZFYVE27  | Unclassified  |
| <b>GP110_HUMAN</b>  | Probable G-protein coupled receptor 110                                   | GPR110   | Receptors     |
| <b>GPC6A_HUMAN</b>  | G-protein coupled receptor family C group 6 member A                      | GPRC6A   | Receptors     |
| <b>GP158_HUMAN</b>  | Probable G-protein coupled receptor 158                                   | GPR158   | Receptors     |
| <b>NAGT1_HUMAN</b>  | Sodium-dependent glucose transporter 1                                    | NAGLT1   | Unclassified  |
| <b>SIRBL_HUMAN</b>  | Signal-regulatory protein beta-1 isoform 3                                | SIRPB1   | Miscellaneous |
| <b>OR2G6_HUMAN</b>  | Olfactory receptor 2G6                                                    | OR2G6    | Receptors     |
| <b>GP157_HUMAN</b>  | Probable G-protein coupled receptor 157                                   | GPR157   | Receptors     |
| <b>LRC38_HUMAN</b>  | Leucine-rich repeat-containing protein 38                                 | LRRC38   | Miscellaneous |
| <b>VSIG8_HUMAN</b>  | V-set and immunoglobulin domain-containing protein 8                      | VSIG8    | Miscellaneous |
| <b>P210L_HUMAN</b>  | Nuclear pore membrane glycoprotein 210-like                               | NUP210L  | Unclassified  |
| <b>CAHD1_HUMAN</b>  | VWFA and cache domain-containing protein 1                                | CACHD1   | Transporters  |
| <b>F1711_HUMAN</b>  | Protein FAM171A1                                                          | FAM171A1 | Unclassified  |
| <b>K0319_HUMAN</b>  | Dyslexia-associated protein KIAA0319                                      | KIAA0319 | Unclassified  |
| <b>ATRNL1_HUMAN</b> | Attractin-like protein 1                                                  | ATRNL1   | Unclassified  |
| <b>GP107_HUMAN</b>  | Protein GPR107                                                            | GPR107   | Receptors     |
| <b>IL23R_HUMAN</b>  | Interleukin-23 receptor                                                   | IL23R    | Receptors     |
| <b>SUSD4_HUMAN</b>  | Sushi domain-containing protein 4                                         | SUSD4    | Unclassified  |
| <b>NKAI2_HUMAN</b>  | Sodium/potassium-transporting ATPase subunit beta-1-interacting protein 2 | NKAIN2   | Transporters  |
| <b>PEAR1_HUMAN</b>  | Platelet endothelial aggregation receptor 1                               | PEAR1    | Receptors     |
| <b>RET1L_HUMAN</b>  | Retinoic acid early transcript 1L protein                                 | RAET1L   | Miscellaneous |
| <b>MALR1_HUMAN</b>  | MAM and LDL-receptor class A domain-containing protein 1                  | MALRD1   | Receptors     |
| <b>IZUM3_HUMAN</b>  | Izumo sperm-egg fusion protein 3                                          | IZUMO3   | Unclassified  |
| <b>ANO1_HUMAN</b>   | Anoctamin-1                                                               | ANO1     | Miscellaneous |
| <b>2B1D_HUMAN</b>   | HLA class II histocompatibility antigen, DRB1-13 beta chain               | HLA-DRB1 | Miscellaneous |
| <b>CD276_HUMAN</b>  | CD276 antigen                                                             | CD276    | Miscellaneous |
| <b>MUC17_HUMAN</b>  | Mucin-17                                                                  | MUC17    | Unclassified  |
| <b>STEAP4_HUMAN</b> | Metalloreductase STEAP4                                                   | STEAP4   | Transporters  |
| <b>NR3L1_HUMAN</b>  | Natural cytotoxicity triggering receptor 3 ligand 1                       | NCR3LG1  | Unclassified  |
| <b>LMBD2_HUMAN</b>  | LMBR1 domain-containing protein 2                                         | LMBRD2   | Unclassified  |
| <b>RNF43_HUMAN</b>  | E3 ubiquitin-protein ligase RNF43                                         | RNF43    | Unclassified  |
| <b>ENK6_HUMAN</b>   | Endogenous retrovirus group K member 6 Env polypeptide                    | ERVK-6   | Miscellaneous |
| <b>S6A19_HUMAN</b>  | Sodium-dependent neutral amino acid transporter B(0)AT1                   | SLC6A19  | Transporters  |
| <b>FCRL6_HUMAN</b>  | Fc receptor-like protein 6                                                | FCRL6    | Receptors     |
| <b>GP139_HUMAN</b>  | Probable G-protein coupled receptor 139                                   | GPR139   | Receptors     |



|                    |                                                             |          |               |
|--------------------|-------------------------------------------------------------|----------|---------------|
| <b>VASN_HUMAN</b>  | Vasorin                                                     | VASN     | Miscellaneous |
| <b>LAIR1_HUMAN</b> | Leukocyte-associated immunoglobulin-like receptor 1         | LAIR1    | Unclassified  |
| <b>TM225_HUMAN</b> | Transmembrane protein 225                                   | TMEM225  | Unclassified  |
| <b>RET1G_HUMAN</b> | Retinoic acid early transcript 1G protein                   | RAET1G   | Miscellaneous |
| <b>SIGIR_HUMAN</b> | Single Ig IL-1-related receptor                             | SIGIRR   | Receptors     |
| <b>TM211_HUMAN</b> | Transmembrane protein 211                                   | TMEM211  | Miscellaneous |
| <b>T132E_HUMAN</b> | Transmembrane protein 132E                                  | TMEM132E | Miscellaneous |
| <b>OR5MA_HUMAN</b> | Olfactory receptor 5M10                                     | OR5M10   | Receptors     |
| <b>OR4CB_HUMAN</b> | Olfactory receptor 4C11                                     | OR4C11   | Receptors     |
| <b>OR4F3_HUMAN</b> | Olfactory receptor 4F3/4F16/4F29                            | OR4F3    | Receptors     |
| <b>OR2T5_HUMAN</b> | Olfactory receptor 2T5                                      | OR2T5    | Receptors     |
| <b>OR2T2_HUMAN</b> | Olfactory receptor 2T2                                      | OR2T2    | Receptors     |
| <b>OR2A2_HUMAN</b> | Olfactory receptor 2A2                                      | OR2A2    | Receptors     |
| <b>O52W1_HUMAN</b> | Olfactory receptor 52W1                                     | OR52W1   | Receptors     |
| <b>O4A47_HUMAN</b> | Olfactory receptor 4A47                                     | OR4A47   | Receptors     |
| <b>O10K2_HUMAN</b> | Olfactory receptor 10K2                                     | OR10K2   | Receptors     |
| <b>O52E8_HUMAN</b> | Olfactory receptor 52E8                                     | OR52E8   | Receptors     |
| <b>OR6B2_HUMAN</b> | Olfactory receptor 6B2                                      | OR6B2    | Receptors     |
| <b>O7E24_HUMAN</b> | Olfactory receptor 7E24                                     | OR7E24   | Receptors     |
| <b>PTCRA_HUMAN</b> | Pre T-cell antigen receptor alpha                           | PTCRA    |               |
| <b>ANO7_HUMAN</b>  | Anoctamin-7                                                 | ANO7     | Miscellaneous |
| <b>NCKX6_HUMAN</b> | Sodium/potassium/calcium exchanger 6, mitochondrial         | SLC8B1   | Transporters  |
| <b>HPHL1_HUMAN</b> | Hephaestin-like protein 1                                   | HEPHL1   | Unclassified  |
| <b>TEN4_HUMAN</b>  | Teneurin-4                                                  | TENM4    | Miscellaneous |
| <b>MFSD5_HUMAN</b> | Molybdate-anion transporter                                 | MFSD5    | Unclassified  |
| <b>CK087_HUMAN</b> | Uncharacterized protein C11orf87                            | C11orf87 | Unclassified  |
| <b>TECT3_HUMAN</b> | Tectonic-3                                                  | TCTN3    | Unclassified  |
| <b>MFS12_HUMAN</b> | Major facilitator superfamily domain-containing protein 12  | MFSD12   | Unclassified  |
| <b>GP153_HUMAN</b> | Probable G-protein coupled receptor 153                     | GPR153   | Receptors     |
| <b>NIPA3_HUMAN</b> | Magnesium transporter NIPA3                                 | NIPAL1   | Transporters  |
| <b>RGMB_HUMAN</b>  | RGM domain family member B                                  | RGMB     |               |
| <b>PLB1_HUMAN</b>  | Phospholipase B1, membrane-associated                       | PLB1     | Unclassified  |
| <b>NPAL3_HUMAN</b> | NIPA-like protein 3                                         | NIPAL3   | Transporters  |
| <b>CNNM4_HUMAN</b> | Metal transporter CNNM4                                     | CNNM4    | Unclassified  |
| <b>S39A4_HUMAN</b> | Zinc transporter ZIP4                                       | SLC39A4  | Transporters  |
| <b>F171B_HUMAN</b> | Protein FAM171B                                             | FAM171B  | Unclassified  |
| <b>TM154_HUMAN</b> | Transmembrane protein 154                                   | TMEM154  | Unclassified  |
| <b>EMB_HUMAN</b>   | Embigin                                                     | EMB      | Unclassified  |
| <b>CXB7_HUMAN</b>  | Gap junction beta-7 protein                                 | GJB7     | Miscellaneous |
| <b>LIRA6_HUMAN</b> | Leukocyte immunoglobulin-like receptor subfamily A member 6 | LILRA6   | Receptors     |

|                |                                                                          |          |               |
|----------------|--------------------------------------------------------------------------|----------|---------------|
| TRAT1_HUMAN    | T-cell receptor-associated transmembrane adapter 1                       | TRAT1    | Unclassified  |
| RHDF2_HUMAN    | Inactive rhomboid protein 2                                              | RHBDF2   | Unclassified  |
| LRFN4_HUMAN    | Leucine-rich repeat and fibronectin type-III domain-containing protein 4 | LRFN4    | Miscellaneous |
| GP179_HUMAN    | Probable G-protein coupled receptor 179                                  | GPR179   | Receptors     |
| GTR7_HUMAN     | Solute carrier family 2, facilitated glucose transporter member 7        | SLC2A7   | Transporters  |
| MO2R2_HUMAN    | Cell surface glycoprotein CD200 receptor 2                               | CD200R1L | Receptors     |
| GP133_HUMAN    | Probable G-protein coupled receptor 133                                  | GPR133   | Receptors     |
| S22AP_HUMAN    | Solute carrier family 22 member 25                                       | SLC22A25 | Transporters  |
| OPN5_HUMAN     | Opsin-5                                                                  | OPN5     | Receptors     |
| S4A10_HUMAN    | Sodium-driven chloride bicarbonate exchanger                             | SLC4A10  | Transporters  |
| PLET1_HUMAN    | Placenta-expressed transcript 1 protein                                  | PLET1    |               |
| CSPG4_HUMAN    | Chondroitin sulfate proteoglycan 4                                       | CSPG4    | Unclassified  |
| ARAIID_HUMAN   | All-trans retinoic acid-induced differentiation factor                   | ATRAID   | Unclassified  |
| EPGN_HUMAN     | Epigen                                                                   | EPGN     | Unclassified  |
| IL27RA_HUMAN   | Interleukin-27 receptor subunit alpha                                    | IL27RA   | Unclassified  |
| PARM1_HUMAN    | Prostate androgen-regulated mucin-like protein 1                         | PARM1    | Unclassified  |
| TMCO3_HUMAN    | Transmembrane and coiled-coil domain-containing protein 3                | TMCO3    | Unclassified  |
| CD16L2_HUMAN   | CD164 sialomucin-like 2 protein                                          | CD164L2  | Unclassified  |
| SUSD1_HUMAN    | Sushi domain-containing protein 1                                        | SUSD1    | Unclassified  |
| KIRREL2_HUMAN  | Kin of IRRE-like protein 2                                               | KIRREL2  | Miscellaneous |
| LYPD4_HUMAN    | Ly6/PLAUR domain-containing protein 4                                    | LYPD4    |               |
| LYPD5_HUMAN    | Ly6/PLAUR domain-containing protein 5                                    | LYPD5    | Unclassified  |
| ENPP6_HUMAN    | Ectonucleotide pyrophosphatase/phosphodiesterase family member 6         | ENPP6    |               |
| MPZL3_HUMAN    | Myelin protein zero-like protein 3                                       | MPZL3    | Miscellaneous |
| LMBRL_HUMAN    | Protein LMBR1L                                                           | LMBR1L   | Unclassified  |
| LAYN_HUMAN     | Layilin                                                                  | LAYN     | Receptors     |
| VSTM1_HUMAN    | V-set and transmembrane domain-containing protein 1                      | VSTM1    | Miscellaneous |
| PLXDC2_HUMAN   | Plexin domain-containing protein 2                                       | PLXDC2   | Unclassified  |
| LYPD8_HUMAN    | Ly6/PLAUR domain-containing protein 8                                    | LYPD8    | Unclassified  |
| LYPD2_HUMAN    | Ly6/PLAUR domain-containing protein 2                                    | LYPD2    |               |
| CLEC4G_HUMAN   | C-type lectin domain family 4 member G                                   | CLEC4G   | Receptors     |
| PI16_HUMAN     | Peptidase inhibitor 16                                                   | PI16     | Unclassified  |
| AEGP_HUMAN     | Apical endosomal glycoprotein                                            | MAMDC4   | Unclassified  |
| SEZ6L2_HUMAN   | Seizure 6-like protein 2                                                 | SEZ6L2   | Unclassified  |
| MFSD7_HUMAN    | Major facilitator superfamily domain-containing protein 7                | MFSD7    | Unclassified  |
| BTNL3_HUMAN    | Butyrophilin-like protein 3                                              | BTNL3    | Miscellaneous |
| TMEM108_HUMAN  | Transmembrane protein 108                                                | TMEM108  | Unclassified  |
| KIAA1324_HUMAN | UPF0577 protein KIAA1324                                                 | KIAA1324 | Unclassified  |
| CD300LG_HUMAN  | CMRF35-like molecule 9                                                   | CD300LG  | Receptors     |
| BTNL9_HUMAN    | Butyrophilin-like protein 9                                              | BTNL9    | Miscellaneous |

|                     |                                                                                                   |           |               |
|---------------------|---------------------------------------------------------------------------------------------------|-----------|---------------|
| <b>ISLR2_HUMAN</b>  | Immunoglobulin superfamily containing leucine-rich repeat protein 2                               | ISLR2     | Miscellaneous |
| <b>LRRN1_HUMAN</b>  | Leucine-rich repeat neuronal protein 1                                                            | LRRN1     | Miscellaneous |
| <b>IL20RB_HUMAN</b> | Interleukin-20 receptor subunit beta                                                              | IL20RB    | Receptors     |
| <b>LRIG3_HUMAN</b>  | Leucine-rich repeats and immunoglobulin-like domains protein 3                                    | LRIG3     | Miscellaneous |
| <b>CLC9A_HUMAN</b>  | C-type lectin domain family 9 member A                                                            | CLEC9A    | Receptors     |
| <b>GSG1L_HUMAN</b>  | Germ cell-specific gene 1-like protein                                                            | GSG1L     | Unclassified  |
| <b>GFRAL_HUMAN</b>  | GDNF family receptor alpha-like                                                                   | GFRAL     | Unclassified  |
| <b>TMIG1_HUMAN</b>  | Transmembrane and immunoglobulin domain-containing protein 1                                      | TMIGD1    | Unclassified  |
| <b>CLM4_HUMAN</b>   | CMRF35-like molecule 4                                                                            | CD300LD   | Receptors     |
| <b>UNC5D_HUMAN</b>  | Netrin receptor UNC5D                                                                             | UNC5D     | Receptors     |
| <b>CEA20_HUMAN</b>  | Carcinoembryonic antigen-related cell adhesion molecule 20                                        | CEACAM20  | Miscellaneous |
| <b>DLK2_HUMAN</b>   | Protein delta homolog 2                                                                           | DLK2      | Miscellaneous |
| <b>LIGO4_HUMAN</b>  | Leucine-rich repeat and immunoglobulin-like domain-containing nogo receptor-interacting protein 4 | LINGO4    | Miscellaneous |
| <b>FAT4_HUMAN</b>   | Protocadherin Fat 4                                                                               | FAT4      | Miscellaneous |
| <b>PCD23_HUMAN</b>  | Protocadherin-23                                                                                  | DCHS2     | Miscellaneous |
| <b>NPSR1_HUMAN</b>  | Neuropeptide S receptor                                                                           | NPSR1     | Receptors     |
| <b>S36A4_HUMAN</b>  | Proton-coupled amino acid transporter 4                                                           | SLC36A4   | Transporters  |
| <b>CD109_HUMAN</b>  | CD109 antigen                                                                                     | CD109     |               |
| <b>T184A_HUMAN</b>  | Transmembrane protein 184A                                                                        | TMEM184A  | Unclassified  |
| <b>SIG15_HUMAN</b>  | Sialic acid-binding Ig-like lectin 15                                                             | SIGLEC15  | Miscellaneous |
| <b>SPNS3_HUMAN</b>  | Protein spinster homolog 3                                                                        | SPNS3     | Transporters  |
| <b>S39A5_HUMAN</b>  | Zinc transporter ZIP5                                                                             | SLC39A5   | Transporters  |
| <b>GLDN_HUMAN</b>   | Gliomedin                                                                                         | GLDN      |               |
| <b>SCAR5_HUMAN</b>  | Scavenger receptor class A member 5                                                               | SCARA5    | Unclassified  |
| <b>UNC5A_HUMAN</b>  | Netrin receptor UNC5A                                                                             | UNC5A     | Receptors     |
| <b>FRRS1_HUMAN</b>  | Ferric-chelate reductase 1                                                                        | FRRS1     | Unclassified  |
| <b>LAAT1_HUMAN</b>  | Lysosomal amino acid transporter 1 homolog                                                        | PQLC2     | Unclassified  |
| <b>TM182_HUMAN</b>  | Transmembrane protein 182                                                                         | TMEM182   | Unclassified  |
| <b>SO4C1_HUMAN</b>  | Solute carrier organic anion transporter family member 4C1                                        | SLCO4C1   | Transporters  |
| <b>CTSRG_HUMAN</b>  | Cation channel sperm-associated protein subunit gamma                                             | CATSPERG  | Unclassified  |
| <b>QSOX2_HUMAN</b>  | Sulfhydryl oxidase 2                                                                              | QSOX2     | Enzymes       |
| <b>CL17A_HUMAN</b>  | C-type lectin domain family 17, member A                                                          | CLEC17A   | Receptors     |
| <b>SHSA6_HUMAN</b>  | Protein shisa-6 homolog                                                                           | SHISA6    |               |
| <b>MOT12_HUMAN</b>  | Monocarboxylate transporter 12                                                                    | SLC16A12  | Transporters  |
| <b>MFSD6_HUMAN</b>  | Major facilitator superfamily domain-containing protein 6                                         | MFSD6     | Unclassified  |
| <b>CDHR3_HUMAN</b>  | Cadherin-related family member 3                                                                  | CDHR3     | Unclassified  |
| <b>TMM26_HUMAN</b>  | Transmembrane protein 26                                                                          | TMEM26    | Unclassified  |
| <b>K154L_HUMAN</b>  | UPF0606 protein KIAA1549L                                                                         | KIAA1549L | Unclassified  |
| <b>RGMC_HUMAN</b>   | Hemojuvelin                                                                                       | HFE2      | Unclassified  |
| <b>PTHD4_HUMAN</b>  | Patched domain-containing protein 4                                                               | PTCHD4    | Unclassified  |

|                     |                                                                                                   |          |               |
|---------------------|---------------------------------------------------------------------------------------------------|----------|---------------|
| <b>5HT3D_HUMAN</b>  | 5-hydroxytryptamine receptor 3D                                                                   | HTR3D    | Transporters  |
| <b>NCKX5_HUMAN</b>  | Sodium/potassium/calcium exchanger 5                                                              | SLC24A5  | Transporters  |
| <b>PGAP1_HUMAN</b>  | GPI inositol-deacylase                                                                            | PGAP1    | Unclassified  |
| <b>ANO5_HUMAN</b>   | Anoctamin-5                                                                                       | ANO5     | Miscellaneous |
| <b>BT2A1_HUMAN</b>  | Butyrophilin subfamily 2 member A1                                                                | BTN2A1   | Miscellaneous |
| <b>SV2A_HUMAN</b>   | Synaptic vesicle glycoprotein 2A                                                                  | SV2A     | Transporters  |
| <b>TRIL_HUMAN</b>   | TLR4 interactor with leucine rich repeats                                                         | TRIL     | Miscellaneous |
| <b>SV2B_HUMAN</b>   | Synaptic vesicle glycoprotein 2B                                                                  | SV2B     | Transporters  |
| <b>LIGO2_HUMAN</b>  | Leucine-rich repeat and immunoglobulin-like domain-containing nogo receptor-interacting protein 2 | LINGO2   | Miscellaneous |
| <b>S26A9_HUMAN</b>  | Solute carrier family 26 member 9                                                                 | SLC26A9  | Transporters  |
| <b>OTOP1_HUMAN</b>  | Otopetrin-1                                                                                       | OTOP1    | Unclassified  |
| <b>OTOP2_HUMAN</b>  | Otopetrin-2                                                                                       | OTOP2    | Unclassified  |
| <b>S29A4_HUMAN</b>  | Equilibrative nucleoside transporter 4                                                            | SLC29A4  | Transporters  |
| <b>OTOAN_HUMAN</b>  | Otoancorin                                                                                        | OTOA     |               |
| <b>TS1R3_HUMAN</b>  | Taste receptor type 1 member 3                                                                    | TAS1R3   | Receptors     |
| <b>TS1R1_HUMAN</b>  | Taste receptor type 1 member 1                                                                    | TAS1R1   | Receptors     |
| <b>PRSS41_HUMAN</b> | Putative serine protease 41                                                                       | PRSS41   |               |
| <b>LPFR4_HUMAN</b>  | Lipid phosphate phosphatase-related protein type 4                                                | LPFR4    | Enzymes       |
| <b>S36A1_HUMAN</b>  | Proton-coupled amino acid transporter 1                                                           | SLC36A1  | Transporters  |
| <b>ERMP1_HUMAN</b>  | Endoplasmic reticulum metalloproteinase 1                                                         | ERMP1    | Unclassified  |
| <b>NEGR1_HUMAN</b>  | Neuronal growth regulator 1                                                                       | NEGR1    | Unclassified  |
| <b>ATG9A_HUMAN</b>  | Autophagy-related protein 9A                                                                      | ATG9A    | Unclassified  |
| <b>LYSM3_HUMAN</b>  | LysM and putative peptidoglycan-binding domain-containing protein 3                               | LYSMD3   | Unclassified  |
| <b>GP155_HUMAN</b>  | Integral membrane protein GPR155                                                                  | GPR155   | Unclassified  |
| <b>S46A3_HUMAN</b>  | Solute carrier family 46 member 3                                                                 | SLC46A3  | Transporters  |
| <b>OR2W3_HUMAN</b>  | Olfactory receptor 2W3                                                                            | OR2W3    | Receptors     |
| <b>TMC7_HUMAN</b>   | Transmembrane channel-like protein 7                                                              | TMC7     | Unclassified  |
| <b>CSMD2_HUMAN</b>  | CUB and sushi domain-containing protein 2                                                         | CSMD2    | Miscellaneous |
| <b>KCNK1_HUMAN</b>  | Potassium channel subfamily K member 18                                                           | KCNK18   | Transporters  |
| <b>PK1L2_HUMAN</b>  | Polycystic kidney disease protein 1-like 2                                                        | PKD1L2   | Transporters  |
| <b>PK1L3_HUMAN</b>  | Polycystic kidney disease protein 1-like 3                                                        | PKD1L3   | Transporters  |
| <b>LRP10_HUMAN</b>  | Low-density lipoprotein receptor-related protein 10                                               | LRP10    | Receptors     |
| <b>MDGA2_HUMAN</b>  | MAM domain-containing glycosylphosphatidylinositol anchor protein 2                               | MDGA2    | Unclassified  |
| <b>VN1R4_HUMAN</b>  | Vomeroneasal type-1 receptor 4                                                                    | VN1R4    | Receptors     |
| <b>SDK1_HUMAN</b>   | Protein sidekick-1                                                                                | SDK1     | Miscellaneous |
| <b>GP142_HUMAN</b>  | Probable G-protein coupled receptor 142                                                           | GPR142   | Receptors     |
| <b>GP141_HUMAN</b>  | Probable G-protein coupled receptor 141                                                           | GPR141   | Receptors     |
| <b>CEA19_HUMAN</b>  | Carcinoembryonic antigen-related cell adhesion molecule 19                                        | CEACAM19 | Miscellaneous |
| <b>BTLA_HUMAN</b>   | B- and T-lymphocyte attenuator                                                                    | BTLA     | Unclassified  |

|                     |                                                                        |           |               |
|---------------------|------------------------------------------------------------------------|-----------|---------------|
| <b>MILR1_HUMAN</b>  | Allergen-1                                                             | MILR1     | Miscellaneous |
| <b>VTCN1_HUMAN</b>  | V-set domain-containing T-cell activation inhibitor 1                  | VTCN1     | Miscellaneous |
| <b>LHPL4_HUMAN</b>  | Lipoma HMGIC fusion partner-like 4 protein                             | LHFPL4    | Miscellaneous |
| <b>MEGF8_HUMAN</b>  | Multiple epidermal growth factor-like domains protein 8                | MEGF8     | Unclassified  |
| <b>GP144_HUMAN</b>  | Probable G-protein coupled receptor 144                                | GPR144    | Receptors     |
| <b>T179B_HUMAN</b>  | Transmembrane protein 179B                                             | TMEM179B  | Unclassified  |
| <b>AMGO2_HUMAN</b>  | Amphoterin-induced protein 2                                           | AMIGO2    | Miscellaneous |
| <b>DSG4_HUMAN</b>   | Desmoglein-4                                                           | DSG4      | Miscellaneous |
| <b>MRGRG_HUMAN</b>  | Mas-related G-protein coupled receptor member G                        | MRGPRG    | Receptors     |
| <b>MARGRE_HUMAN</b> | Mas-related G-protein coupled receptor member E                        | MARGPRE   | Receptors     |
| <b>GP149_HUMAN</b>  | Probable G-protein coupled receptor 149                                | GPR149    | Unclassified  |
| <b>EMR4_HUMAN</b>   | Putative EGF-like module-containing mucin-like hormone receptor-like 4 | EMR4P     | Receptors     |
| <b>GP126_HUMAN</b>  | G-protein coupled receptor 126                                         | GPR126    | Receptors     |
| <b>GP123_HUMAN</b>  | Probable G-protein coupled receptor 123                                | GPR123    | Receptors     |
| <b>ILDR1_HUMAN</b>  | Immunoglobulin-like domain-containing receptor 1                       | ILDR1     | Unclassified  |
| <b>CLC14_HUMAN</b>  | C-type lectin domain family 14 member A                                | CLEC14A   | Unclassified  |
| <b>TM11B_HUMAN</b>  | Transmembrane protease serine 11B                                      | TMPRSS11B | Enzymes       |
| <b>T150A_HUMAN</b>  | Transmembrane protein 150A                                             | TMEM150A  | Unclassified  |
| <b>TM110_HUMAN</b>  | Transmembrane protein 110                                              | TMEM110   | Unclassified  |
| <b>CN037_HUMAN</b>  | Uncharacterized protein C14orf37                                       | C14orf37  | Unclassified  |
| <b>TSN33_HUMAN</b>  | Tetraspanin-33                                                         | TSPAN33   | Miscellaneous |
| <b>SO6A1_HUMAN</b>  | Solute carrier organic anion transporter family member 6A1             | SLCO6A1   | Transporters  |
| <b>ABCAC_HUMAN</b>  | ATP-binding cassette sub-family A member 12                            | ABCA12    | Transporters  |
| <b>LBN_HUMAN</b>    | Limbin                                                                 | EVC2      | Unclassified  |
| <b>R4RL1_HUMAN</b>  | Reticulon-4 receptor-like 1                                            | RTN4RL1   |               |
| <b>R4RL2_HUMAN</b>  | Reticulon-4 receptor-like 2                                            | RTN4RL2   |               |
| <b>CAD24_HUMAN</b>  | Cadherin-24                                                            | CDH24     | Miscellaneous |
| <b>CUZD1_HUMAN</b>  | CUB and zona pellucida-like domain-containing protein 1                | CUZD1     | Unclassified  |
| <b>ABCAD_HUMAN</b>  | ATP-binding cassette sub-family A member 13                            | ABCA13    | Transporters  |
| <b>OSTA_HUMAN</b>   | Organic solute transporter subunit alpha                               | SLC51A    | Unclassified  |
| <b>OSTB_HUMAN</b>   | Organic solute transporter subunit beta                                | SLC51B    | Unclassified  |
| <b>ADR2_HUMAN</b>   | Adiponectin receptor protein 2                                         | ADIPOR2   | Receptors     |
| <b>TIKI1_HUMAN</b>  | Metalloprotease TIKI1                                                  | TRABD2A   | Unclassified  |
| <b>GP180_HUMAN</b>  | Integral membrane protein GPR180                                       | GPR180    | Unclassified  |
| <b>C163A_HUMAN</b>  | Scavenger receptor cysteine-rich type 1 protein M130                   | CD163     | Unclassified  |
| <b>SERC5_HUMAN</b>  | Serine incorporator 5                                                  | SERINC5   | Transporters  |
| <b>LRRT4_HUMAN</b>  | Leucine-rich repeat transmembrane neuronal protein 4                   | LRRTM4    | Miscellaneous |
| <b>LRRT3_HUMAN</b>  | Leucine-rich repeat transmembrane neuronal protein 3                   | LRRTM3    | Miscellaneous |
| <b>VS10L_HUMAN</b>  | V-set and immunoglobulin domain-containing protein 10-like             | VSIG10L   | Miscellaneous |
| <b>S22AG_HUMAN</b>  | Solute carrier family 22 member 16                                     | SLC22A16  | Transporters  |

|                    |                                                                                  |          |               |
|--------------------|----------------------------------------------------------------------------------|----------|---------------|
| <b>P2RY8_HUMAN</b> | P2Y purinoceptor 8                                                               | P2RY8    | Receptors     |
| <b>LRP11_HUMAN</b> | Low-density lipoprotein receptor-related protein 11                              | LRP11    | Receptors     |
| <b>TPRA1_HUMAN</b> | Transmembrane protein adipocyte-associated 1                                     | TPRA1    | Unclassified  |
| <b>KCMB4_HUMAN</b> | Calcium-activated potassium channel subunit beta-4                               | KCNMB4   | Transporters  |
| <b>UN93A_HUMAN</b> | Protein unc-93 homolog A                                                         | UNC93A   | Unclassified  |
| <b>OSTM1_HUMAN</b> | Osteopetrosis-associated transmembrane protein 1                                 | OSTM1    | Unclassified  |
| <b>LHPL1_HUMAN</b> | Lipoma HMGIC fusion partner-like 1 protein                                       | LHFPL1   | Miscellaneous |
| <b>PKHL1_HUMAN</b> | Fibrocystin-L                                                                    | PKHD1L1  | Unclassified  |
| <b>AMGO1_HUMAN</b> | Amphoterin-induced protein 1                                                     | AMIGO1   | Miscellaneous |
| <b>AMGO3_HUMAN</b> | Amphoterin-induced protein 3                                                     | AMIGO3   | Miscellaneous |
| <b>VSIG1_HUMAN</b> | V-set and immunoglobulin domain-containing protein 1                             | VSIG1    | Miscellaneous |
| <b>CTSRD_HUMAN</b> | Cation channel sperm-associated protein subunit delta                            | CATSPERD | Unclassified  |
| <b>PRIMA_HUMAN</b> | Proline-rich membrane anchor 1                                                   | PRIMA1   | Unclassified  |
| <b>GOLI_HUMAN</b>  | E3 ubiquitin-protein ligase RNF130                                               | RNF130   | Unclassified  |
| <b>TM219_HUMAN</b> | Insulin-like growth factor-binding protein 3 receptor                            | TMEM219  | Unclassified  |
| <b>FRAS1_HUMAN</b> | Extracellular matrix protein FRAS1                                               | FRAS1    | Unclassified  |
| <b>GPR97_HUMAN</b> | Probable G-protein coupled receptor 97                                           | GPR97    | Receptors     |
| <b>NRROS_HUMAN</b> | Negative regulator of reactive oxygen species                                    | NRROS    | Miscellaneous |
| <b>TMM25_HUMAN</b> | Transmembrane protein 25                                                         | TMEM25   | Unclassified  |
| <b>LRAD3_HUMAN</b> | Low-density lipoprotein receptor class A domain-containing protein 3             | LDLRAD3  | Unclassified  |
| <b>JAML1_HUMAN</b> | Junctional adhesion molecule-like                                                | AMICA1   | Miscellaneous |
| <b>INLR1_HUMAN</b> | Interferon lambda receptor 1                                                     | IFNLR1   | Receptors     |
| <b>TMPS6_HUMAN</b> | Transmembrane protease serine 6                                                  | TMPS6    | Enzymes       |
| <b>ABCA9_HUMAN</b> | ATP-binding cassette sub-family A member 9                                       | ABCA9    | Transporters  |
| <b>SPP2C_HUMAN</b> | Signal peptide peptidase-like 2C                                                 | SPPL2C   | Unclassified  |
| <b>PLDX1_HUMAN</b> | Plexin domain-containing protein 1                                               | PLXDC1   | Unclassified  |
| <b>RELL1_HUMAN</b> | RELT-like protein 1                                                              | RELL1    | Unclassified  |
| <b>HDBP1_HUMAN</b> | Glycosylphosphatidylinositol-anchored high density lipoprotein-binding protein 1 | GPIHBP1  |               |
| <b>S41A1_HUMAN</b> | Solute carrier family 41 member 1                                                | SLC41A1  | Transporters  |
| <b>S22A9_HUMAN</b> | Solute carrier family 22 member 9                                                | SLC22A9  | Transporters  |
| <b>IGDC3_HUMAN</b> | Immunoglobulin superfamily DCC subclass member 3                                 | IGDCC3   | Receptors     |
| <b>SPNS2_HUMAN</b> | Protein spinster homolog 2                                                       | SPNS2    | Transporters  |
| <b>VSTM4_HUMAN</b> | V-set and transmembrane domain-containing protein 4                              | VSTM4    | Unclassified  |
| <b>SLIK4_HUMAN</b> | SLIT and NTRK-like protein 4                                                     | SLITRK4  | Miscellaneous |
| <b>CTL2_HUMAN</b>  | Choline transporter-like protein 2                                               | SLC44A2  | Transporters  |
| <b>MFS6L_HUMAN</b> | Major facilitator superfamily domain-containing protein 6-like                   | MFSD6L   | Unclassified  |
| <b>GP125_HUMAN</b> | Probable G-protein coupled receptor 125                                          | GPR125   | Receptors     |
| <b>SCN4B_HUMAN</b> | Sodium channel subunit beta-4                                                    | SCN4B    | Transporters  |
| <b>CNTN4_HUMAN</b> | Contactin-4                                                                      | CNTN4    | Unclassified  |
| <b>CD302_HUMAN</b> | CD302 antigen                                                                    | CD302    | Receptors     |

|                     |                                                             |          |               |
|---------------------|-------------------------------------------------------------|----------|---------------|
| <b>OR4N5_HUMAN</b>  | Olfactory receptor 4N5                                      | OR4N5    | Receptors     |
| <b>CAD26_HUMAN</b>  | Cadherin-like protein 26                                    | CDH26    | Miscellaneous |
| <b>S15A3_HUMAN</b>  | Solute carrier family 15 member 3                           | SLC15A3  | Transporters  |
| <b>PSYR_HUMAN</b>   | Psychosine receptor                                         | GPR65    | Receptors     |
| <b>TEFF1_HUMAN</b>  | Tomoregulin-1                                               | TMEFF1   | Unclassified  |
| <b>IZUM1_HUMAN</b>  | Izumo sperm-egg fusion protein 1                            | IZUMO1   | Unclassified  |
| <b>S22AF_HUMAN</b>  | Solute carrier family 22 member 15                          | SLC22A15 | Transporters  |
| <b>NALCN_HUMAN</b>  | Sodium leak channel non-selective protein                   | NALCN    | Unclassified  |
| <b>GP116_HUMAN</b>  | Probable G-protein coupled receptor 116                     | GPR116   | Receptors     |
| <b>GP115_HUMAN</b>  | Probable G-protein coupled receptor 115                     | GPR115   | Receptors     |
| <b>GP114_HUMAN</b>  | Probable G-protein coupled receptor 114                     | GPR114   | Receptors     |
| <b>GP113_HUMAN</b>  | Probable G-protein coupled receptor 113                     | GPR113   | Receptors     |
| <b>GP112_HUMAN</b>  | Probable G-protein coupled receptor 112                     | GPR112   | Receptors     |
| <b>GP111_HUMAN</b>  | Probable G-protein coupled receptor 111                     | GPR111   | Receptors     |
| <b>UNC5B_HUMAN</b>  | Netrin receptor UNC5B                                       | UNC5B    | Receptors     |
| <b>GPR64_HUMAN</b>  | G-protein coupled receptor 64                               | GPR64    | Receptors     |
| <b>KIRR3_HUMAN</b>  | Kin of IRRE-like protein 3                                  | KIRREL3  | Miscellaneous |
| <b>ABCA7_HUMAN</b>  | ATP-binding cassette sub-family A member 7                  | ABCA7    | Transporters  |
| <b>APCD1_HUMAN</b>  | Protein APCDD1                                              | APCDD1   | Unclassified  |
| <b>NLGNX_HUMAN</b>  | Neuroigin-4, X-linked                                       | NLGN4X   | Miscellaneous |
| <b>OR4N4_HUMAN</b>  | Olfactory receptor 4N4                                      | OR4N4    | Receptors     |
| <b>OR8I2_HUMAN</b>  | Olfactory receptor 8I2                                      | OR8I2    | Receptors     |
| <b>VSI10_HUMAN</b>  | V-set and immunoglobulin domain-containing protein 10       | VSIG10   | Unclassified  |
| <b>KI2LA_HUMAN</b>  | Killer cell immunoglobulin-like receptor 2DL5A              | KIR2DL5A | Receptors     |
| <b>CADM3_HUMAN</b>  | Cell adhesion molecule 3                                    | CADM3    | Miscellaneous |
| <b>O5AS1_HUMAN</b>  | Olfactory receptor 5AS1                                     | OR5AS1   | Receptors     |
| <b>NPT2C_HUMAN</b>  | Sodium-dependent phosphate transport protein 2C             | SLC34A3  | Transporters  |
| <b>PORIM_HUMAN</b>  | Porimin                                                     | TMEM123  | Unclassified  |
| <b>ABCA6_HUMAN</b>  | ATP-binding cassette sub-family A member 6                  | ABCA6    | Transporters  |
| <b>OR8H3_HUMAN</b>  | Olfactory receptor 8H3                                      | OR8H3    | Receptors     |
| <b>OR6V1_HUMAN</b>  | Olfactory receptor 6V1                                      | OR6V1    | Receptors     |
| <b>LIRA2_HUMAN</b>  | Leukocyte immunoglobulin-like receptor subfamily A member 2 | LILRA2   | Receptors     |
| <b>GPC2_HUMAN</b>   | Glypican-2                                                  | GPC2     |               |
| <b>OR8H2_HUMAN</b>  | Olfactory receptor 8H2                                      | OR8H2    | Receptors     |
| <b>GABRG1_HUMAN</b> | Gamma-aminobutyric acid receptor subunit gamma-1            | GABRG1   | Transporters  |
| <b>DYNAP_HUMAN</b>  | Dynactin-associated protein                                 | DYNAP    | Unclassified  |
| <b>PROM2_HUMAN</b>  | Prominin-2                                                  | PROM2    | Unclassified  |
| <b>LYPD1_HUMAN</b>  | Ly6/PLAUR domain-containing protein 1                       | LYPD1    | Unclassified  |
| <b>NLGN1_HUMAN</b>  | Neuroigin-1                                                 | NLGN1    | Miscellaneous |
| <b>OR2L13_HUMAN</b> | Olfactory receptor 2L13                                     | OR2L13   | Receptors     |

|                     |                                                                           |          |               |
|---------------------|---------------------------------------------------------------------------|----------|---------------|
| <b>LAT4_HUMAN</b>   | Large neutral amino acids transporter small subunit 4                     | SLC43A2  | Transporters  |
| <b>LRC25_HUMAN</b>  | Leucine-rich repeat-containing protein 25                                 | LRRC25   | Miscellaneous |
| <b>MUC15_HUMAN</b>  | Mucin-15                                                                  | MUC15    | Unclassified  |
| <b>G137C_HUMAN</b>  | Integral membrane protein GPR137C                                         | GPR137C  | Unclassified  |
| <b>CADM2_HUMAN</b>  | Cell adhesion molecule 2                                                  | CADM2    | Miscellaneous |
| <b>T132C_HUMAN</b>  | Transmembrane protein 132C                                                | TMEM132C | Miscellaneous |
| <b>LIRB2_HUMAN</b>  | Leukocyte immunoglobulin-like receptor subfamily B member 2               | LILRB2   | Receptors     |
| <b>SVOPL_HUMAN</b>  | Putative transporter SVOPL                                                | SVOPL    | Transporters  |
| <b>FGRL1_HUMAN</b>  | Fibroblast growth factor receptor-like 1                                  | FGFRL1   | Unclassified  |
| <b>MFSD4_HUMAN</b>  | Major facilitator superfamily domain-containing protein 4                 | MFSD4    | Unclassified  |
| <b>RPRML_HUMAN</b>  | Reprimo-like protein                                                      | RPRML    | Unclassified  |
| <b>CTL3_HUMAN</b>   | Choline transporter-like protein 3                                        | SLC44A3  | Transporters  |
| <b>FA26E_HUMAN</b>  | Protein FAM26E                                                            | FAM26E   | Enzymes       |
| <b>M4A15_HUMAN</b>  | Membrane-spanning 4-domains subfamily A member 15                         | MS4A15   | Miscellaneous |
| <b>DPP10_HUMAN</b>  | Inactive dipeptidyl peptidase 10                                          | DPP10    | Unclassified  |
| <b>OR2C3_HUMAN</b>  | Olfactory receptor 2C3                                                    | OR2C3    | Receptors     |
| <b>SC5A8_HUMAN</b>  | Sodium-coupled monocarboxylate transporter 1                              | SLC5A8   | Transporters  |
| <b>S15A4_HUMAN</b>  | Solute carrier family 15 member 4                                         | SLC15A4  | Transporters  |
| <b>IGSF1_HUMAN</b>  | Immunoglobulin superfamily member 1                                       | IGSF1    | Receptors     |
| <b>CLD19_HUMAN</b>  | Claudin-19                                                                | CLDN19   | Miscellaneous |
| <b>I22R1_HUMAN</b>  | Interleukin-22 receptor subunit alpha-1                                   | IL22RA1  | Receptors     |
| <b>CD177_HUMAN</b>  | CD177 antigen                                                             | CD177    |               |
| <b>GP161_HUMAN</b>  | G-protein coupled receptor 161                                            | GPR161   | Receptors     |
| <b>PCD20_HUMAN</b>  | Protocadherin-20                                                          | PCDH20   | Miscellaneous |
| <b>KI3L3_HUMAN</b>  | Killer cell immunoglobulin-like receptor 3DL3                             | KIR3DL3  | Receptors     |
| <b>LRC52_HUMAN</b>  | Leucine-rich repeat-containing protein 52                                 | LRRC52   | Miscellaneous |
| <b>TM217_HUMAN</b>  | Transmembrane protein 217                                                 | TMEM217  | Unclassified  |
| <b>PLD5_HUMAN</b>   | Inactive phospholipase D5                                                 | PLD5     | Unclassified  |
| <b>CLD22_HUMAN</b>  | Claudin-22                                                                | CLDN22   | Miscellaneous |
| <b>SIGL1_HUMAN</b>  | SIGLEC family-like protein 1                                              | SIGLECL1 | Unclassified  |
| <b>NKAI3_HUMAN</b>  | Sodium/potassium-transporting ATPase subunit beta-1-interacting protein 3 | NKAIN3   | Transporters  |
| <b>LSME1_HUMAN</b>  | Leucine-rich single-pass membrane protein 1                               | LSMEM1   | Unclassified  |
| <b>DCBD1_HUMAN</b>  | Discoidin, CUB and LCCL domain-containing protein 1                       | DCBLD1   | Unclassified  |
| <b>LRTM2_HUMAN</b>  | Leucine-rich repeat and transmembrane domain-containing protein 2         | LRTM2    | Miscellaneous |
| <b>NLS1_HUMAN</b>   | Sodium-dependent lysophosphatidylcholine symporter 1                      | MFSD2A   | Unclassified  |
| <b>IL17RC_HUMAN</b> | Interleukin-17 receptor C                                                 | IL17RC   | Receptors     |
| <b>FNDC5_HUMAN</b>  | Fibronectin type III domain-containing protein 5                          | FNDC5    | Unclassified  |
| <b>S43A3_HUMAN</b>  | Solute carrier family 43 member 3                                         | SLC43A3  | Transporters  |
| <b>SIDT2_HUMAN</b>  | SID1 transmembrane family member 2                                        | SIDT2    | Unclassified  |
| <b>T178A_HUMAN</b>  | Transmembrane protein 178A                                                | TMEM178A | Unclassified  |



|                     |                                                                     |          |               |
|---------------------|---------------------------------------------------------------------|----------|---------------|
| <b>UBAC2_HUMAN</b>  | Ubiquitin-associated domain-containing protein 2                    | UBAC2    | Unclassified  |
| <b>TM87A_HUMAN</b>  | Transmembrane protein 87A                                           | TMEM87A  | Unclassified  |
| <b>P51I3_HUMAN</b>  | Tumor protein p53-inducible protein 13                              | TP53I13  | Unclassified  |
| <b>TM145_HUMAN</b>  | Transmembrane protein 145                                           | TMEM145  | Unclassified  |
| <b>S38A9_HUMAN</b>  | Putative sodium-coupled neutral amino acid transporter 9            | SLC38A9  | Transporters  |
| <b>CLC1A_HUMAN</b>  | C-type lectin domain family 1 member A                              | CLEC1A   | Receptors     |
| <b>RN149_HUMAN</b>  | E3 ubiquitin-protein ligase RNF149                                  | RNF149   | Unclassified  |
| <b>KCT2_HUMAN</b>   | Keratinocyte-associated transmembrane protein 2                     | KCT2     | Unclassified  |
| <b>NETO2_HUMAN</b>  | Neuropilin and tolloid-like protein 2                               | NETO2    | Unclassified  |
| <b>SPX3_HUMAN</b>   | Sugar phosphate exchanger 3                                         | SLC37A3  | Transporters  |
| <b>DGLB_HUMAN</b>   | Sn1-specific diacylglycerol lipase beta                             | DAGLB    | Unclassified  |
| <b>TM116_HUMAN</b>  | Transmembrane protein 116                                           | TMEM116  | Unclassified  |
| <b>CTL5_HUMAN</b>   | Choline transporter-like protein 5                                  | SLC44A5  | Transporters  |
| <b>KREM2_HUMAN</b>  | Kremen protein 2                                                    | KREMEN2  | Unclassified  |
| <b>LRN4L_HUMAN</b>  | LRRN4 C-terminal-like protein                                       | LRRN4CL  | Unclassified  |
| <b>GPR26_HUMAN</b>  | G-protein coupled receptor 26                                       | GPR26    | Receptors     |
| <b>VGLU3_HUMAN</b>  | Vesicular glutamate transporter 3                                   | SLC17A8  | Transporters  |
| <b>TM104_HUMAN</b>  | Transmembrane protein 104                                           | TMEM104  | Transporters  |
| <b>CNNM3_HUMAN</b>  | Metal transporter CNNM3                                             | CNNM3    | Unclassified  |
| <b>POPD1_HUMAN</b>  | Blood vessel epicardial substance                                   | BVES     | Unclassified  |
| <b>CS018_HUMAN</b>  | Uncharacterized protein C19orf18                                    | C19orf18 | Unclassified  |
| <b>ACV1C_HUMAN</b>  | Activin receptor type-1C                                            | ACVR1C   | Receptors     |
| <b>NFAM1_HUMAN</b>  | NFAT activation molecule 1                                          | NFAM1    | Unclassified  |
| <b>NCKX4_HUMAN</b>  | Sodium/potassium/calcium exchanger 4                                | SLC24A4  | Transporters  |
| <b>RAI3_HUMAN</b>   | Retinoic acid-induced protein 3                                     | GPRC5A   | Receptors     |
| <b>PKR2_HUMAN</b>   | Prokineticin receptor 2                                             | PROKR2   | Receptors     |
| <b>CXG3_HUMAN</b>   | Gap junction gamma-3 protein                                        | GJC3     | Miscellaneous |
| <b>IL17RD_HUMAN</b> | Interleukin-17 receptor D                                           | IL17RD   | Receptors     |
| <b>GPI56_HUMAN</b>  | Probable G-protein coupled receptor 156                             | GPR156   | Receptors     |
| <b>MDGA1_HUMAN</b>  | MAM domain-containing glycosylphosphatidylinositol anchor protein 1 | MDGA1    | Unclassified  |
| <b>IL17RE_HUMAN</b> | Interleukin-17 receptor E                                           | IL17RE   | Receptors     |
| <b>DNER_HUMAN</b>   | Delta and Notch-like epidermal growth factor-related receptor       | DNER     | Unclassified  |
| <b>BEST4_HUMAN</b>  | Bestrophin-4                                                        | BEST4    | Transporters  |
| <b>BEST2_HUMAN</b>  | Bestrophin-2                                                        | BEST2    | Transporters  |
| <b>SEM6D_HUMAN</b>  | Semaphorin-6D                                                       | SEMA6D   | Miscellaneous |
| <b>NLGNY_HUMAN</b>  | Neurologin-4, Y-linked                                              | NLGN4Y   | Miscellaneous |
| <b>NLGN2_HUMAN</b>  | Neurologin-2                                                        | NLGN2    | Miscellaneous |
| <b>VN1R2_HUMAN</b>  | Vomerolnasal type-1 receptor 2                                      | VN1R2    | Receptors     |
| <b>CADM4_HUMAN</b>  | Cell adhesion molecule 4                                            | CADM4    | Unclassified  |
| <b>TSN14_HUMAN</b>  | Tetraspanin-14                                                      | TSPAN14  | Miscellaneous |

|                    |                                             |         |              |
|--------------------|---------------------------------------------|---------|--------------|
| <b>OR5T1_HUMAN</b> | Olfactory receptor 5T1                      | OR5T1   | Receptors    |
| <b>O2T33_HUMAN</b> | Olfactory receptor 2T33                     | OR2T33  | Receptors    |
| <b>O2T12_HUMAN</b> | Olfactory receptor 2T12                     | OR2T12  | Receptors    |
| <b>OR8G5_HUMAN</b> | Olfactory receptor 8G5                      | OR8G5   | Receptors    |
| <b>OR2L5_HUMAN</b> | Olfactory receptor 2L5                      | OR2L5   | Receptors    |
| <b>OR2M7_HUMAN</b> | Olfactory receptor 2M7                      | OR2M7   | Receptors    |
| <b>OR2M3_HUMAN</b> | Olfactory receptor 2M3                      | OR2M3   | Receptors    |
| <b>O2AK2_HUMAN</b> | Olfactory receptor 2AK2                     | OR2AK2  | Receptors    |
| <b>OR2L3_HUMAN</b> | Olfactory receptor 2L3                      | OR2L3   | Receptors    |
| <b>O13H1_HUMAN</b> | Olfactory receptor 13H1                     | OR13H1  | Receptors    |
| <b>O11H1_HUMAN</b> | Olfactory receptor 11H1                     | OR11H1  | Receptors    |
| <b>OR7G3_HUMAN</b> | Olfactory receptor 7G3                      | OR7G3   | Receptors    |
| <b>OR2Z1_HUMAN</b> | Olfactory receptor 2Z1                      | OR2Z1   | Receptors    |
| <b>OR7D4_HUMAN</b> | Olfactory receptor 7D4                      | OR7D4   | Receptors    |
| <b>OR7G2_HUMAN</b> | Olfactory receptor 7G2                      | OR7G2   | Receptors    |
| <b>OR7G1_HUMAN</b> | Olfactory receptor 7G1                      | OR7G1   | Receptors    |
| <b>OR1M1_HUMAN</b> | Olfactory receptor 1M1                      | OR1M1   | Receptors    |
| <b>OR7A2_HUMAN</b> | Putative olfactory receptor 7A2             | OR7A2P  | Receptors    |
| <b>G32P1_HUMAN</b> | Putative G-protein coupled receptor GPR32P1 | GPR32P1 | Unclassified |
| <b>O10H4_HUMAN</b> | Olfactory receptor 10H4                     | OR10H4  | Receptors    |
| <b>O10H5_HUMAN</b> | Olfactory receptor 10H5                     | OR10H5  | Receptors    |
| <b>O4F17_HUMAN</b> | Olfactory receptor 4F17                     | OR4F17  | Receptors    |
| <b>OR4C5_HUMAN</b> | Olfactory receptor 4C5                      | OR4C5   | Receptors    |
| <b>OR4S1_HUMAN</b> | Olfactory receptor 4S1                      | OR4S1   | Receptors    |
| <b>OR4M2_HUMAN</b> | Olfactory receptor 4M2                      | OR4M2   | Receptors    |
| <b>O4F15_HUMAN</b> | Olfactory receptor 4F15                     | OR4F15  | Receptors    |
| <b>OR4F6_HUMAN</b> | Olfactory receptor 4F6                      | OR4F6   | Receptors    |
| <b>O5AU1_HUMAN</b> | Olfactory receptor 5AU1                     | OR5AU1  | Receptors    |
| <b>O11G2_HUMAN</b> | Olfactory receptor 11G2                     | OR11G2  | Receptors    |
| <b>OR4E2_HUMAN</b> | Olfactory receptor 4E2                      | OR4E2   | Receptors    |
| <b>O10G2_HUMAN</b> | Olfactory receptor 10G2                     | OR10G2  | Receptors    |
| <b>O10G3_HUMAN</b> | Olfactory receptor 10G3                     | OR10G3  | Receptors    |
| <b>OR6J1_HUMAN</b> | Olfactory receptor 6J1                      | OR6J1   | Receptors    |
| <b>OR4KH_HUMAN</b> | Olfactory receptor 4K17                     | OR4K17  | Receptors    |
| <b>O11H6_HUMAN</b> | Olfactory receptor 11H6                     | OR11H6  | Receptors    |
| <b>O11H7_HUMAN</b> | Olfactory receptor 11H7                     | OR11H7  | Receptors    |
| <b>O11H4_HUMAN</b> | Olfactory receptor 11H4                     | OR11H4  | Receptors    |
| <b>OR4M1_HUMAN</b> | Olfactory receptor 4M1                      | OR4M1   | Receptors    |
| <b>OR4N2_HUMAN</b> | Olfactory receptor 4N2                      | OR4N2   | Receptors    |
| <b>OR4K2_HUMAN</b> | Olfactory receptor 4K2                      | OR4K2   | Receptors    |

|                     |                                  |         |           |
|---------------------|----------------------------------|---------|-----------|
| <b>OR4K5_HUMAN</b>  | Olfactory receptor 4K5           | OR4K5   | Receptors |
| <b>OR4K1_HUMAN</b>  | Olfactory receptor 4K1           | OR4K1   | Receptors |
| <b>OR4KE_HUMAN</b>  | Olfactory receptor 4K14          | OR4K14  | Receptors |
| <b>O10AD_HUMAN</b>  | Olfactory receptor 10AD1         | OR10AD1 | Receptors |
| <b>OR6C4_HUMAN</b>  | Olfactory receptor 6C4           | OR6C4   | Receptors |
| <b>O2AP1_HUMAN</b>  | Olfactory receptor 2AP1          | OR2AP1  | Receptors |
| <b>O10P1_HUMAN</b>  | Olfactory receptor 10P1          | OR10P1  | Receptors |
| <b>O10A7_HUMAN</b>  | Olfactory receptor 10A7          | OR10A7  | Receptors |
| <b>OR9K2_HUMAN</b>  | Olfactory receptor 9K2           | OR9K2   | Receptors |
| <b>OR4D9_HUMAN</b>  | Olfactory receptor 4D9           | OR4D9   | Receptors |
| <b>OR9Q2_HUMAN</b>  | Olfactory receptor 9Q2           | OR9Q2   | Receptors |
| <b>O52B6_HUMAN</b>  | Olfactory receptor 52B6          | OR52B6  | Receptors |
| <b>O52R1_HUMAN</b>  | Olfactory receptor 52R1          | OR52R1  | Receptors |
| <b>O51D1_HUMAN</b>  | Olfactory receptor 51D1          | OR51D1  | Receptors |
| <b>O5AP2_HUMAN</b>  | Olfactory receptor 5AP2          | OR5AP2  | Receptors |
| <b>O10W1_HUMAN</b>  | Olfactory receptor 10W1          | OR10W1  | Receptors |
| <b>OR5B17_HUMAN</b> | Olfactory receptor 5B17          | OR5B17  | Receptors |
| <b>OR4B1_HUMAN</b>  | Olfactory receptor 4B1           | OR4B1   | Receptors |
| <b>OR4X2_HUMAN</b>  | Olfactory receptor 4X2           | OR4X2   | Receptors |
| <b>OR8J3_HUMAN</b>  | Olfactory receptor 8J3           | OR8J3   | Receptors |
| <b>OR8J2_HUMAN</b>  | Olfactory receptor 8J2           | OR8J2   | Receptors |
| <b>OR5T2_HUMAN</b>  | Olfactory receptor 5T2           | OR5T2   | Receptors |
| <b>OR5T3_HUMAN</b>  | Olfactory receptor 5T3           | OR5T3   | Receptors |
| <b>OR8H1_HUMAN</b>  | Olfactory receptor 8H1           | OR8H1   | Receptors |
| <b>OR8K1_HUMAN</b>  | Olfactory receptor 8K1           | OR8K1   | Receptors |
| <b>OR8BC_HUMAN</b>  | Olfactory receptor 8B12          | OR8B12  | Receptors |
| <b>OR8A1_HUMAN</b>  | Olfactory receptor 8A1           | OR8A1   | Receptors |
| <b>OR8B3_HUMAN</b>  | Olfactory receptor 8B3           | OR8B3   | Receptors |
| <b>OR2D3_HUMAN</b>  | Olfactory receptor 2D3           | OR2D3   | Receptors |
| <b>O56A1_HUMAN</b>  | Olfactory receptor 56A1          | OR56A1  | Receptors |
| <b>O52L2_HUMAN</b>  | Putative olfactory receptor 52L2 | OR52L2P | Receptors |
| <b>O52L1_HUMAN</b>  | Olfactory receptor 52L1          | OR52L1  | Receptors |
| <b>O56A4_HUMAN</b>  | Olfactory receptor 56A4          | OR56A4  | Receptors |
| <b>O52E4_HUMAN</b>  | Olfactory receptor 52E4          | OR52E4  | Receptors |
| <b>O52N2_HUMAN</b>  | Olfactory receptor 52N2          | OR52N2  | Receptors |
| <b>O56B2_HUMAN</b>  | Putative olfactory receptor 56B2 | OR56B2P | Receptors |
| <b>O52N4_HUMAN</b>  | Olfactory receptor 52N4          | OR52N4  | Receptors |
| <b>O56B1_HUMAN</b>  | Olfactory receptor 56B1          | OR56B1  | Receptors |
| <b>OR4DB_HUMAN</b>  | Olfactory receptor 4D11          | OR4D11  | Receptors |
| <b>OR4DA_HUMAN</b>  | Olfactory receptor 4D10          | OR4D10  | Receptors |

|                    |                                  |         |           |
|--------------------|----------------------------------|---------|-----------|
| <b>O10V1_HUMAN</b> | Olfactory receptor 10V1          | OR10V1  | Receptors |
| <b>O5AN1_HUMAN</b> | Olfactory receptor 5AN1          | OR5AN1  | Receptors |
| <b>OR5A2_HUMAN</b> | Olfactory receptor 5A2           | OR5A2   | Receptors |
| <b>OR5A1_HUMAN</b> | Olfactory receptor 5A1           | OR5A1   | Receptors |
| <b>OR4D6_HUMAN</b> | Olfactory receptor 4D6           | OR4D6   | Receptors |
| <b>O52H1_HUMAN</b> | Olfactory receptor 52H1          | OR52H1  | Receptors |
| <b>O52E1_HUMAN</b> | Olfactory receptor 52E1          | OR52E1  | Receptors |
| <b>O52E2_HUMAN</b> | Olfactory receptor 52E2          | OR52E2  | Receptors |
| <b>O51L1_HUMAN</b> | Olfactory receptor 51L1          | OR51L1  | Receptors |
| <b>O51A4_HUMAN</b> | Olfactory receptor 51A4          | OR51A4  | Receptors |
| <b>O51A2_HUMAN</b> | Olfactory receptor 51A2          | OR51A2  | Receptors |
| <b>O51S1_HUMAN</b> | Olfactory receptor 51S1          | OR51S1  | Receptors |
| <b>O51T1_HUMAN</b> | Olfactory receptor 51T1          | OR51T1  | Receptors |
| <b>O51G2_HUMAN</b> | Olfactory receptor 51G2          | OR51G2  | Receptors |
| <b>O51G1_HUMAN</b> | Olfactory receptor 51G1          | OR51G1  | Receptors |
| <b>O52B4_HUMAN</b> | Olfactory receptor 52B4          | OR52B4  | Receptors |
| <b>O52K2_HUMAN</b> | Olfactory receptor 52K2          | OR52K2  | Receptors |
| <b>O52K1_HUMAN</b> | Olfactory receptor 52K1          | OR52K1  | Receptors |
| <b>O52M1_HUMAN</b> | Olfactory receptor 52M1          | OR52M1  | Receptors |
| <b>O52I1_HUMAN</b> | Olfactory receptor 52I1          | OR52I1  | Receptors |
| <b>OR5DG_HUMAN</b> | Olfactory receptor 5D16          | OR5D16  | Receptors |
| <b>OR5L2_HUMAN</b> | Olfactory receptor 5L2           | OR5L2   | Receptors |
| <b>OR5DI_HUMAN</b> | Olfactory receptor 5D18          | OR5D18  | Receptors |
| <b>OR5L1_HUMAN</b> | Olfactory receptor 5L1           | OR5L1   | Receptors |
| <b>OR5DE_HUMAN</b> | Olfactory receptor 5D14          | OR5D14  | Receptors |
| <b>OR5DD_HUMAN</b> | Olfactory receptor 5D13          | OR5D13  | Receptors |
| <b>O4A15_HUMAN</b> | Olfactory receptor 4A15          | OR4A15  | Receptors |
| <b>OR4P4_HUMAN</b> | Olfactory receptor 4P4           | OR4P4   | Receptors |
| <b>OR4CG_HUMAN</b> | Olfactory receptor 4C16          | OR4C16  | Receptors |
| <b>OR4CF_HUMAN</b> | Olfactory receptor 4C15          | OR4C15  | Receptors |
| <b>OR6M1_HUMAN</b> | Olfactory receptor 6M1           | OR6M1   | Receptors |
| <b>OR8D4_HUMAN</b> | Olfactory receptor 8D4           | OR8D4   | Receptors |
| <b>OR4D5_HUMAN</b> | Olfactory receptor 4D5           | OR4D5   | Receptors |
| <b>OR6T1_HUMAN</b> | Olfactory receptor 6T1           | OR6T1   | Receptors |
| <b>O10S1_HUMAN</b> | Olfactory receptor 10S1          | OR10S1  | Receptors |
| <b>O10G4_HUMAN</b> | Olfactory receptor 10G4          | OR10G4  | Receptors |
| <b>O10G9_HUMAN</b> | Olfactory receptor 10G9          | OR10G9  | Receptors |
| <b>O10G8_HUMAN</b> | Olfactory receptor 10G8          | OR10G8  | Receptors |
| <b>O10G7_HUMAN</b> | Olfactory receptor 10G7          | OR10G7  | Receptors |
| <b>O10D4_HUMAN</b> | Putative olfactory receptor 10D4 | OR10D4P | Receptors |

|                    |                                 |        |           |
|--------------------|---------------------------------|--------|-----------|
| <b>OR4A4_HUMAN</b> | Putative olfactory receptor 4A4 | OR4A4P | Receptors |
| <b>OR4CD_HUMAN</b> | Olfactory receptor 4C13         | OR4C13 | Receptors |
| <b>OR8J1_HUMAN</b> | Olfactory receptor 8J1          | OR8J1  | Receptors |
| <b>OR5M9_HUMAN</b> | Olfactory receptor 5M9          | OR5M9  | Receptors |
| <b>OR5M3_HUMAN</b> | Olfactory receptor 5M3          | OR5M3  | Receptors |
| <b>OR5M8_HUMAN</b> | Olfactory receptor 5M8          | OR5M8  | Receptors |
| <b>OR5M1_HUMAN</b> | Olfactory receptor 5M1          | OR5M1  | Receptors |
| <b>O5AR1_HUMAN</b> | Olfactory receptor 5AR1         | OR5AR1 | Receptors |
| <b>OR9G4_HUMAN</b> | Olfactory receptor 9G4          | OR9G4  | Receptors |
| <b>OR6Q1_HUMAN</b> | Olfactory receptor 6Q1          | OR6Q1  | Receptors |
| <b>OR1S2_HUMAN</b> | Olfactory receptor 1S2          | OR1S2  | Receptors |
| <b>O10Q1_HUMAN</b> | Olfactory receptor 10Q1         | OR10Q1 | Receptors |
| <b>OR9Q1_HUMAN</b> | Olfactory receptor 9Q1          | OR9Q1  | Receptors |
| <b>OR9I1_HUMAN</b> | Olfactory receptor 9I1          | OR9I1  | Receptors |
| <b>O13A1_HUMAN</b> | Olfactory receptor 13A1         | OR13A1 | Receptors |
| <b>OR1L6_HUMAN</b> | Olfactory receptor 1L6          | OR1L6  | Receptors |
| <b>OR1K1_HUMAN</b> | Olfactory receptor 1K1          | OR1K1  | Receptors |
| <b>OR5C1_HUMAN</b> | Olfactory receptor 5C1          | OR5C1  | Receptors |
| <b>OR1L4_HUMAN</b> | Olfactory receptor 1L4          | OR1L4  | Receptors |
| <b>OR1B1_HUMAN</b> | Olfactory receptor 1B1          | OR1B1  | Receptors |
| <b>OR1L8_HUMAN</b> | Olfactory receptor 1L8          | OR1L8  | Receptors |
| <b>OR1N2_HUMAN</b> | Olfactory receptor 1N2          | OR1N2  | Receptors |
| <b>OR1N1_HUMAN</b> | Olfactory receptor 1N1          | OR1N1  | Receptors |
| <b>OR1J4_HUMAN</b> | Olfactory receptor 1J4          | OR1J4  | Receptors |
| <b>OR1J2_HUMAN</b> | Olfactory receptor 1J2          | OR1J2  | Receptors |
| <b>OR1J1_HUMAN</b> | Olfactory receptor 1J1          | OR1J1  | Receptors |
| <b>O13F1_HUMAN</b> | Olfactory receptor 13F1         | OR13F1 | Receptors |
| <b>O13C4_HUMAN</b> | Olfactory receptor 13C4         | OR13C4 | Receptors |
| <b>O13C3_HUMAN</b> | Olfactory receptor 13C3         | OR13C3 | Receptors |
| <b>O13C8_HUMAN</b> | Olfactory receptor 13C8         | OR13C8 | Receptors |
| <b>O13C5_HUMAN</b> | Olfactory receptor 13C5         | OR13C5 | Receptors |
| <b>O13C2_HUMAN</b> | Olfactory receptor 13C2         | OR13C2 | Receptors |
| <b>O13C9_HUMAN</b> | Olfactory receptor 13C9         | OR13C9 | Receptors |
| <b>OR2K2_HUMAN</b> | Olfactory receptor 2K2          | OR2K2  | Receptors |
| <b>O13J1_HUMAN</b> | Olfactory receptor 13J1         | OR13J1 | Receptors |
| <b>OR9A2_HUMAN</b> | Olfactory receptor 9A2          | OR9A2  | Receptors |
| <b>O2A12_HUMAN</b> | Olfactory receptor 2A12         | OR2A12 | Receptors |
| <b>OR2A1_HUMAN</b> | Olfactory receptor 2A1/2A42     | OR2A1  | Receptors |
| <b>OR9A1_HUMAN</b> | Putative olfactory receptor 9A1 | OR9A1P | Receptors |
| <b>OR9A4_HUMAN</b> | Olfactory receptor 9A4          | OR9A4  | Receptors |

|                    |                                         |          |           |
|--------------------|-----------------------------------------|----------|-----------|
| <b>OR2I1_HUMAN</b> | Putative olfactory receptor 2I1         | OR2I1P   | Receptors |
| <b>GP150_HUMAN</b> | Probable G-protein coupled receptor 150 | GPR150   | Receptors |
| <b>OR2Y1_HUMAN</b> | Olfactory receptor 2Y1                  | OR2Y1    | Receptors |
| <b>O13D1_HUMAN</b> | Olfactory receptor 13D1                 | OR13D1   | Receptors |
| <b>OR5H6_HUMAN</b> | Olfactory receptor 5H6                  | OR5H6    | Receptors |
| <b>OR5H2_HUMAN</b> | Olfactory receptor 5H2                  | OR5H2    | Receptors |
| <b>OR6B3_HUMAN</b> | Olfactory receptor 6B3                  | OR6B3    | Receptors |
| <b>OR6K6_HUMAN</b> | Olfactory receptor 6K6                  | OR6K6    | Receptors |
| <b>O11L1_HUMAN</b> | Olfactory receptor 11L1                 | OR11L1   | Receptors |
| <b>O2T34_HUMAN</b> | Olfactory receptor 2T34                 | OR2T34   | Receptors |
| <b>O2T35_HUMAN</b> | Olfactory receptor 2T35                 | OR2T35   | Receptors |
| <b>O10T2_HUMAN</b> | Olfactory receptor 10T2                 | OR10T2   | Receptors |
| <b>O10K1_HUMAN</b> | Olfactory receptor 10K1                 | OR10K1   | Receptors |
| <b>O10R2_HUMAN</b> | Olfactory receptor 10R2                 | OR10R2   | Receptors |
| <b>OR6Y1_HUMAN</b> | Olfactory receptor 6Y1                  | OR6Y1    | Receptors |
| <b>OR6P1_HUMAN</b> | Olfactory receptor 6P1                  | OR6P1    | Receptors |
| <b>O10X1_HUMAN</b> | Olfactory receptor 10X1                 | OR10X1   | Receptors |
| <b>O10Z1_HUMAN</b> | Olfactory receptor 10Z1                 | OR10Z1   | Receptors |
| <b>OR6K2_HUMAN</b> | Olfactory receptor 6K2                  | OR6K2    | Receptors |
| <b>OR6K3_HUMAN</b> | Olfactory receptor 6K3                  | OR6K3    | Receptors |
| <b>OR6N1_HUMAN</b> | Olfactory receptor 6N1                  | OR6N1    | Receptors |
| <b>OR6N2_HUMAN</b> | Olfactory receptor 6N2                  | OR6N2    | Receptors |
| <b>O10J6_HUMAN</b> | Putative olfactory receptor 10J6        | OR10J6P  | Receptors |
| <b>OR2L8_HUMAN</b> | Olfactory receptor 2L8                  | OR2L8    | Receptors |
| <b>O2AJ1_HUMAN</b> | Olfactory receptor 2AJ1                 | OR2AJ1   | Receptors |
| <b>O14K1_HUMAN</b> | Olfactory receptor 14K1                 | OR14K1   | Receptors |
| <b>O13G1_HUMAN</b> | Olfactory receptor 13G1                 | OR13G1   | Receptors |
| <b>OR2G3_HUMAN</b> | Olfactory receptor 2G3                  | OR2G3    | Receptors |
| <b>OR2G2_HUMAN</b> | Olfactory receptor 2G2                  | OR2G2    | Receptors |
| <b>OR6F1_HUMAN</b> | Olfactory receptor 6F1                  | OR6F1    | Receptors |
| <b>O2T10_HUMAN</b> | Olfactory receptor 2T10                 | OR2T10   | Receptors |
| <b>OR2T4_HUMAN</b> | Olfactory receptor 2T4                  | OR2T4    | Receptors |
| <b>O2T11_HUMAN</b> | Olfactory receptor 2T11                 | OR2T11   | Receptors |
| <b>O2T29_HUMAN</b> | Olfactory receptor 2T29                 | OR2T29   | Receptors |
| <b>OR2T3_HUMAN</b> | Olfactory receptor 2T3                  | OR2T3    | Receptors |
| <b>O2T27_HUMAN</b> | Olfactory receptor 2T27                 | OR2T27   | Receptors |
| <b>OR4Q3_HUMAN</b> | Olfactory receptor 4Q3                  | OR4Q3    | Receptors |
| <b>OR1P1_HUMAN</b> | Olfactory receptor 1P1                  | OR1P1    | Receptors |
| <b>O11H2_HUMAN</b> | Olfactory receptor 11H2                 | OR11H2   | Receptors |
| <b>O10AC_HUMAN</b> | Putative olfactory receptor 10AC1       | OR10AC1P |           |

|                    |                                  |         |              |
|--------------------|----------------------------------|---------|--------------|
| <b>OR8S1_HUMAN</b> | Olfactory receptor 8S1           | OR8S1   | Receptors    |
| <b>OR8U1_HUMAN</b> | Olfactory receptor 8U1           | OR8U1   | Receptors    |
| <b>OR2L2_HUMAN</b> | Olfactory receptor 2L2           | OR2L2   | Receptors    |
| <b>OR5J2_HUMAN</b> | Olfactory receptor 5J2           | OR5J2   | Receptors    |
| <b>O10AG_HUMAN</b> | Olfactory receptor 10AG1         | OR10AG1 | Receptors    |
| <b>OR4F5_HUMAN</b> | Olfactory receptor 4F5           | OR4F5   | Receptors    |
| <b>OR4C3_HUMAN</b> | Olfactory receptor 4C3           | OR4C3   | Receptors    |
| <b>OR6S1_HUMAN</b> | Olfactory receptor 6S1           | OR6S1   | Receptors    |
| <b>OR4KF_HUMAN</b> | Olfactory receptor 4K15          | OR4K15  | Receptors    |
| <b>OR4KD_HUMAN</b> | Olfactory receptor 4K13          | OR4K13  | Receptors    |
| <b>OR4L1_HUMAN</b> | Olfactory receptor 4L1           | OR4L1   | Receptors    |
| <b>OR5B3_HUMAN</b> | Olfactory receptor 5B3           | OR5B3   | Receptors    |
| <b>OR4X1_HUMAN</b> | Olfactory receptor 4X1           | OR4X1   | Receptors    |
| <b>OR8K5_HUMAN</b> | Olfactory receptor 8K5           | OR8K5   | Receptors    |
| <b>OR8K3_HUMAN</b> | Olfactory receptor 8K3           | OR8K3   | Receptors    |
| <b>O52N1_HUMAN</b> | Olfactory receptor 52N1          | OR52N1  | Receptors    |
| <b>O56A3_HUMAN</b> | Olfactory receptor 56A3          | OR56A3  | Receptors    |
| <b>O52E5_HUMAN</b> | Olfactory receptor 52E5          | OR52E5  | Receptors    |
| <b>O52N5_HUMAN</b> | Olfactory receptor 52N5          | OR52N5  | Receptors    |
| <b>O52P1_HUMAN</b> | Putative olfactory receptor 52P1 | OR52P1P | Receptors    |
| <b>O51Q1_HUMAN</b> | Olfactory receptor 51Q1          | OR51Q1  | Receptors    |
| <b>O52J3_HUMAN</b> | Olfactory receptor 52J3          | OR52J3  | Receptors    |
| <b>O51F2_HUMAN</b> | Olfactory receptor 51F2          | OR51F2  | Receptors    |
| <b>O51H1_HUMAN</b> | Putative olfactory receptor 51H1 | OR51H1P | Receptors    |
| <b>O51A7_HUMAN</b> | Olfactory receptor 51A7          | OR51A7  | Receptors    |
| <b>O52I2_HUMAN</b> | Olfactory receptor 52I2          | OR52I2  | Receptors    |
| <b>OR5W2_HUMAN</b> | Olfactory receptor 5W2           | OR5W2   | Receptors    |
| <b>O4A16_HUMAN</b> | Olfactory receptor 4A16          | OR4A16  | Receptors    |
| <b>OR4C6_HUMAN</b> | Olfactory receptor 4C6           | OR4C6   | Receptors    |
| <b>OR4S2_HUMAN</b> | Olfactory receptor 4S2           | OR4S2   | Receptors    |
| <b>O10A6_HUMAN</b> | Olfactory receptor 10A6          | OR10A6  | Receptors    |
| <b>O56B4_HUMAN</b> | Olfactory receptor 56B4          | OR56B4  | Receptors    |
| <b>OR6X1_HUMAN</b> | Olfactory receptor 6X1           | OR6X1   | Receptors    |
| <b>O10D3_HUMAN</b> | Putative olfactory receptor 10D3 | OR10D3  | Receptors    |
| <b>O10G6_HUMAN</b> | Olfactory receptor 10G6          | OR10G6  | Receptors    |
| <b>OR4A5_HUMAN</b> | Olfactory receptor 4A5           | OR4A5   | Receptors    |
| <b>OR5R1_HUMAN</b> | Olfactory receptor 5R1           | OR5R1   | Receptors    |
| <b>OR9G1_HUMAN</b> | Olfactory receptor 9G1           | OR9G1   | Receptors    |
| <b>O5AK3_HUMAN</b> | Putative olfactory receptor 5AK3 | OR5AK3P | Unclassified |
| <b>O5AK2_HUMAN</b> | Olfactory receptor 5AK2          | OR5AK2  | Receptors    |

|                     |                                                                              |          |               |
|---------------------|------------------------------------------------------------------------------|----------|---------------|
| <b>OR1S1_HUMAN</b>  | Olfactory receptor 1S1                                                       | OR1S1    | Receptors     |
| <b>OR1L3_HUMAN</b>  | Olfactory receptor 1L3                                                       | OR1L3    | Receptors     |
| <b>OR1L1_HUMAN</b>  | Olfactory receptor 1L1                                                       | OR1L1    | Receptors     |
| <b>O13C6_HUMAN</b>  | Putative olfactory receptor 13C6                                             | OR13C6P  | Receptors     |
| <b>O2AE1_HUMAN</b>  | Olfactory receptor 2AE1                                                      | OR2AE1   | Receptors     |
| <b>OR2W6_HUMAN</b>  | Putative olfactory receptor 2W6                                              | OR2W6P   | Receptors     |
| <b>OR1F12_HUMAN</b> | Olfactory receptor 1F12                                                      | OR1F12   | Receptors     |
| <b>OR2V1_HUMAN</b>  | Olfactory receptor 2V1                                                       | OR2V1    | Receptors     |
| <b>OR5K1_HUMAN</b>  | Olfactory receptor 5K1                                                       | OR5K1    | Receptors     |
| <b>OR5K2_HUMAN</b>  | Olfactory receptor 5K2                                                       | OR5K2    | Receptors     |
| <b>O10J5_HUMAN</b>  | Olfactory receptor 10J5                                                      | OR10J5   | Receptors     |
| <b>O14AG_HUMAN</b>  | Olfactory receptor 14A16                                                     | OR14A16  | Receptors     |
| <b>O14L1_HUMAN</b>  | Putative olfactory receptor 14L1                                             | OR14L1P  | Receptors     |
| <b>O14CZ_HUMAN</b>  | Olfactory receptor 14C36                                                     | OR14C36  | Receptors     |
| <b>OR2T6_HUMAN</b>  | Olfactory receptor 2T6                                                       | OR2T6    | Receptors     |
| <b>KI2LB_HUMAN</b>  | Killer cell immunoglobulin-like receptor 2DL5B                               | KIR2DL5B | Receptors     |
| <b>LIRB1_HUMAN</b>  | Leukocyte immunoglobulin-like receptor subfamily B member 1                  | LILRB1   | Receptors     |
| <b>MFSD8_HUMAN</b>  | Major facilitator superfamily domain-containing protein 8                    | MFSD8    | Transporters  |
| <b>CP052_HUMAN</b>  | Uncharacterized protein C16orf52                                             | C16orf52 | Unclassified  |
| <b>IL31R_HUMAN</b>  | Interleukin-31 receptor subunit alpha                                        | IL31RA   | Receptors     |
| <b>LPD6B_HUMAN</b>  | Ly6/PLAUR domain-containing protein 6B                                       | LYPD6B   | Unclassified  |
| <b>PCD19_HUMAN</b>  | Protocadherin-19                                                             | PCDH19   | Miscellaneous |
| <b>TMHS_HUMAN</b>   | Tetraspan membrane protein of hair cell stereocilia                          | LHFPL5   | Miscellaneous |
| <b>TIP_HUMAN</b>    | T-cell immunomodulatory protein                                              | ITFG1    | Unclassified  |
| <b>S7A14_HUMAN</b>  | Probable cationic amino acid transporter                                     | SLC7A14  | Transporters  |
| <b>FNDC9_HUMAN</b>  | Fibronectin type III domain-containing protein 9                             | FNDC9    | Unclassified  |
| <b>SYNPR_HUMAN</b>  | Synaptoporin                                                                 | SYNPR    | Miscellaneous |
| <b>LPPIR1_HUMAN</b> | Lipid phosphate phosphatase-related protein type 1                           | LPPIR1   | Enzymes       |
| <b>F174A_HUMAN</b>  | Membrane protein FAM174A                                                     | FAM174A  | Unclassified  |
| <b>ADA32_HUMAN</b>  | Disintegrin and metalloproteinase domain-containing protein 32               | ADAM32   | Enzymes       |
| <b>O51E1_HUMAN</b>  | Olfactory receptor 51E1                                                      | OR51E1   | Receptors     |
| <b>S22A8_HUMAN</b>  | Solute carrier family 22 member 8                                            | SLC22A8  | Transporters  |
| <b>STT3B_HUMAN</b>  | Dolichyl-diphosphooligosaccharide--protein glycosyltransferase subunit STT3B | STT3B    | Enzymes       |
| <b>SPP2B_HUMAN</b>  | Signal peptide peptidase-like 2B                                             | SPPL2B   | Unclassified  |
| <b>SPP2A_HUMAN</b>  | Signal peptide peptidase-like 2A                                             | SPPL2A   | Unclassified  |
| <b>HM13_HUMAN</b>   | Minor histocompatibility antigen H13                                         | HM13     | Unclassified  |
| <b>NMD3A_HUMAN</b>  | Glutamate receptor ionotropic, NMDA 3A                                       | GRIN3A   | Transporters  |
| <b>ZPLD1_HUMAN</b>  | Zona pellucida-like domain-containing protein 1                              | ZPLD1    | Unclassified  |
| <b>PKR1_HUMAN</b>   | Prokineticin receptor 1                                                      | PROKR1   | Receptors     |
| <b>N2DL4_HUMAN</b>  | NKG2D ligand 4                                                               | RAET1E   | Miscellaneous |



|                    |                                                                     |          |               |
|--------------------|---------------------------------------------------------------------|----------|---------------|
| <b>GTR12_HUMAN</b> | Solute carrier family 2, facilitated glucose transporter member 12  | SLC2A12  | Transporters  |
| <b>MO2R1_HUMAN</b> | Cell surface glycoprotein CD200 receptor 1                          | CD200R1  | Receptors     |
| <b>DSCL1_HUMAN</b> | Down syndrome cell adhesion molecule-like protein 1                 | DSCAML1  | Miscellaneous |
| <b>GTR14_HUMAN</b> | Solute carrier family 2, facilitated glucose transporter member 14  | SLC2A14  | Transporters  |
| <b>NETO1_HUMAN</b> | Neuropilin and tolloid-like protein 1                               | NETO1    | Unclassified  |
| <b>SACA4_HUMAN</b> | Sperm acrosome membrane-associated protein 4                        | SPACA4   |               |
| <b>KCNG4_HUMAN</b> | Potassium voltage-gated channel subfamily G member 4                | KCNG4    | Transporters  |
| <b>KCNV2_HUMAN</b> | Potassium voltage-gated channel subfamily V member 2                | KCNV2    | Transporters  |
| <b>HAVR2_HUMAN</b> | Hepatitis A virus cellular receptor 2                               | HAVCR2   | Unclassified  |
| <b>CLM1_HUMAN</b>  | CMRF35-like molecule 1                                              | CD300LF  | Receptors     |
| <b>HCAR2_HUMAN</b> | Hydroxycarboxylic acid receptor 2                                   | HCAR2    | Receptors     |
| <b>OXER1_HUMAN</b> | Oxoecosanoid receptor 1                                             | OXER1    | Receptors     |
| <b>MRGRD_HUMAN</b> | Mas-related G-protein coupled receptor member D                     | MRGPRD   | Receptors     |
| <b>GP152_HUMAN</b> | Probable G-protein coupled receptor 152                             | GPR152   | Receptors     |
| <b>GPBAR_HUMAN</b> | G-protein coupled bile acid receptor 1                              | GPBAR1   | Receptors     |
| <b>RL3R2_HUMAN</b> | Relaxin-3 receptor 2                                                | RXFP4    | Receptors     |
| <b>GP151_HUMAN</b> | Probable G-protein coupled receptor 151                             | GPR151   | Receptors     |
| <b>GP148_HUMAN</b> | Probable G-protein coupled receptor 148                             | GPR148   | Receptors     |
| <b>GP119_HUMAN</b> | Glucose-dependent insulinotropic receptor                           | GPR119   | Receptors     |
| <b>FAT3_HUMAN</b>  | Protocadherin Fat 3                                                 | FAT3     | Miscellaneous |
| <b>PK1L1_HUMAN</b> | Polycystic kidney disease protein 1-like 1                          | PKD1L1   | Transporters  |
| <b>IGDC4_HUMAN</b> | Immunoglobulin superfamily DCC subclass member 4                    | IGDCC4   | Receptors     |
| <b>TS1R2_HUMAN</b> | Taste receptor type 1 member 2                                      | TAS1R2   | Receptors     |
| <b>RN128_HUMAN</b> | E3 ubiquitin-protein ligase RNF128                                  | RNF128   | Unclassified  |
| <b>SPX2_HUMAN</b>  | Sugar phosphate exchanger 2                                         | SLC37A2  | Transporters  |
| <b>PO210_HUMAN</b> | Nuclear pore membrane glycoprotein 210                              | NUP210   | Unclassified  |
| <b>PIGO_HUMAN</b>  | GPI ethanolamine phosphate transferase 3                            | PIGO     | Unclassified  |
| <b>LRC15_HUMAN</b> | Leucine-rich repeat-containing protein 15                           | LRRC15   | Miscellaneous |
| <b>GDPD5_HUMAN</b> | Glycerophosphodiester phosphodiesterase domain-containing protein 5 | GDPD5    | Unclassified  |
| <b>SCRB1_HUMAN</b> | Scavenger receptor class B member 1                                 | SCARB1   | Receptors     |
| <b>CHPT1_HUMAN</b> | Cholinephosphotransferase 1                                         | CHPT1    | Enzymes       |
| <b>S22AH_HUMAN</b> | Solute carrier family 22 member 17                                  | SLC22A17 | Transporters  |
| <b>LRRN4_HUMAN</b> | Leucine-rich repeat neuronal protein 4                              | LRRN4    | Miscellaneous |
| <b>S38A5_HUMAN</b> | Sodium-coupled neutral amino acid transporter 5                     | SLC38A5  | Transporters  |
| <b>T255B_HUMAN</b> | Transmembrane protein 255B                                          | TMEM255B | Unclassified  |
| <b>TM171_HUMAN</b> | Transmembrane protein 171                                           | TMEM171  | Unclassified  |
| <b>SCTM1_HUMAN</b> | Secreted and transmembrane protein 1                                | SECTM1   | Unclassified  |
| <b>LMBR1_HUMAN</b> | Limb region 1 protein homolog                                       | LMBR1    | Unclassified  |
| <b>BT2A2_HUMAN</b> | Butyrophilin subfamily 2 member A2                                  | BTN2A2   | Miscellaneous |
| <b>ITLN1_HUMAN</b> | Intelectin-1                                                        | ITLN1    |               |

|              |                                                                      |           |               |
|--------------|----------------------------------------------------------------------|-----------|---------------|
| NCUG1_HUMAN  | Lysosomal protein NCU-G1                                             | C1orf85   | Unclassified  |
| ZNRF4_HUMAN  | Zinc/RING finger protein 4                                           | ZNRF4     | Unclassified  |
| NRG4_HUMAN   | Pro-neuregulin-4, membrane-bound isoform                             | NRG4      | Unclassified  |
| CTL1_HUMAN   | Choline transporter-like protein 1                                   | SLC44A1   | Transporters  |
| STAB2_HUMAN  | Stabilin-2                                                           | STAB2     | Receptors     |
| S13A3_HUMAN  | Solute carrier family 13 member 3                                    | SLC13A3   | Transporters  |
| FCAMR_HUMAN  | High affinity immunoglobulin alpha and immunoglobulin mu Fc receptor | FCAMR     | Receptors     |
| SC5AB_HUMAN  | Sodium/myo-inositol cotransporter 2                                  | SLC5A11   | Transporters  |
| ABCA5_HUMAN  | ATP-binding cassette sub-family A member 5                           | ABCA5     | Transporters  |
| 5HT3C_HUMAN  | 5-hydroxytryptamine receptor 3C                                      | HTR3C     | Transporters  |
| RXFP2_HUMAN  | Relaxin receptor 2                                                   | RXFP2     | Receptors     |
| GPR98_HUMAN  | G-protein coupled receptor 98                                        | GPR98     | Receptors     |
| MUC16_HUMAN  | Mucin-16                                                             | MUC16     | Unclassified  |
| CCGL_HUMAN   | Voltage-dependent calcium channel gamma-like subunit                 | TMEM37    | Transporters  |
| CCG8_HUMAN   | Voltage-dependent calcium channel gamma-8 subunit                    | CACNG8    | Transporters  |
| CTR3_HUMAN   | Cationic amino acid transporter 3                                    | SLC7A3    | Transporters  |
| SORC1_HUMAN  | VPS10 domain-containing receptor SorCS1                              | SORCS1    | Receptors     |
| CNTP5_HUMAN  | Contactin-associated protein-like 5                                  | CNTNAP5   | Receptors     |
| TM158_HUMAN  | Transmembrane protein 158                                            | TMEM158   | Unclassified  |
| OR8D1_HUMAN  | Olfactory receptor 8D1                                               | OR8D1     | Receptors     |
| OR5P2_HUMAN  | Olfactory receptor 5P2                                               | OR5P2     | Receptors     |
| OR5P3_HUMAN  | Olfactory receptor 5P3                                               | OR5P3     | Receptors     |
| OR1E3_HUMAN  | Olfactory receptor 1E3                                               | OR1E3     | Receptors     |
| ENK8_HUMAN   | Endogenous retrovirus group K member 8 Env polypeptide               | ERVK-8    | Miscellaneous |
| EN113_HUMAN  | Endogenous retrovirus group K member 113 Env polypeptide             | HERVK_113 | Miscellaneous |
| PIEZ1_HUMAN  | Piezo-type mechanosensitive ion channel component 1                  | PIEZO1    | Unclassified  |
| YLAT2_HUMAN  | Y+L amino acid transporter 2                                         | SLC7A6    | Transporters  |
| K0247_HUMAN  | Uncharacterized protein KIAA0247                                     | KIAA0247  | Unclassified  |
| NICA_HUMAN   | Nicastrin                                                            | NCSTN     | Unclassified  |
| TM9SF4_HUMAN | Transmembrane 9 superfamily member 4                                 | TM9SF4    | Miscellaneous |
| SL9A6_HUMAN  | Sodium/hydrogen exchanger 6                                          | SLC9A6    | Transporters  |
| SGCD_HUMAN   | Delta-sarcoglycan                                                    | SGCD      | Miscellaneous |
| LPAR1_HUMAN  | Lysophosphatidic acid receptor 1                                     | LPAR1     | Receptors     |
| FCGRB_HUMAN  | High affinity immunoglobulin gamma Fc receptor 1B                    | FCGR1B    | Receptors     |
| SORL1_HUMAN  | Sortilin-related receptor                                            | SORL1     | Receptors     |
| PVRL2_HUMAN  | Nectin-2                                                             | PVRL2     | Receptors     |
| PTPRU_HUMAN  | Receptor-type tyrosine-protein phosphatase U                         | PTPRU     | Receptors     |
| NRCAM_HUMAN  | Neuronal cell adhesion molecule                                      | NRCAM     | Miscellaneous |
| PCSK5_HUMAN  | Proprotein convertase subtilisin/kexin type 5                        | PCSK5     | Unclassified  |
| EDA_HUMAN    | Ectodysplasin-A                                                      | EDA       | Unclassified  |

|                     |                                                               |          |               |
|---------------------|---------------------------------------------------------------|----------|---------------|
| <b>GHSR_HUMAN</b>   | Growth hormone secretagogue receptor type 1                   | GHSR     | Receptors     |
| <b>SEM4D_HUMAN</b>  | Semaphorin-4D                                                 | SEMA4D   | Miscellaneous |
| <b>NEO1_HUMAN</b>   | Neogenin                                                      | NEO1     | Receptors     |
| <b>MRP2_HUMAN</b>   | Canalicular multispecific organic anion transporter 1         | ABCC2    | Transporters  |
| <b>SC5A5_HUMAN</b>  | Sodium/iodide cotransporter                                   | SLC5A5   | Transporters  |
| <b>PTPR2_HUMAN</b>  | Receptor-type tyrosine-protein phosphatase N2                 | PTPRN2   | Receptors     |
| <b>TNR14_HUMAN</b>  | Tumor necrosis factor receptor superfamily member 14          | TNFRSF14 | Receptors     |
| <b>SO2A1_HUMAN</b>  | Solute carrier organic anion transporter family member 2A1    | SLCO2A1  | Transporters  |
| <b>IGSF2_HUMAN</b>  | Immunoglobulin superfamily member 2                           | CD101    | Receptors     |
| <b>TNR25_HUMAN</b>  | Tumor necrosis factor receptor superfamily member 25          | TNFRSF25 | Receptors     |
| <b>NAR4_HUMAN</b>   | Ecto-ADP-ribosyltransferase 4                                 | ART4     |               |
| <b>1B38_HUMAN</b>   | HLA class I histocompatibility antigen, B-38 alpha chain      | HLA-B    | Miscellaneous |
| <b>HMR1_HUMAN</b>   | Major histocompatibility complex class I-related gene protein | MR1      | Unclassified  |
| <b>1C17_HUMAN</b>   | HLA class I histocompatibility antigen, Cw-17 alpha chain     | HLA-C    | Miscellaneous |
| <b>2B1C_HUMAN</b>   | HLA class II histocompatibility antigen, DRB1-12 beta chain   | HLA-DRB1 | Miscellaneous |
| <b>KISSR_HUMAN</b>  | KiSS-1 receptor                                               | KISS1R   | Receptors     |
| <b>S38A4_HUMAN</b>  | Sodium-coupled neutral amino acid transporter 4               | SLC38A4  | Transporters  |
| <b>PIGT_HUMAN</b>   | GPI transamidase component PIG-T                              | PIGT     | Unclassified  |
| <b>TAAR8_HUMAN</b>  | Trace amine-associated receptor 8                             | TAAR8    | Receptors     |
| <b>IGSF8_HUMAN</b>  | Immunoglobulin superfamily member 8                           | IGSF8    | Receptors     |
| <b>MCHR2_HUMAN</b>  | Melanin-concentrating hormone receptor 2                      | MCHR2    | Receptors     |
| <b>PMEPA_HUMAN</b>  | Protein TMEPAI                                                | PMEPA1   | Unclassified  |
| <b>TR19L_HUMAN</b>  | Tumor necrosis factor receptor superfamily member 19L         | RELTL    | Receptors     |
| <b>T106A_HUMAN</b>  | Transmembrane protein 106A                                    | TMEM106A | Unclassified  |
| <b>SLAF9_HUMAN</b>  | SLAM family member 9                                          | SLAMF9   | Unclassified  |
| <b>MRGRF_HUMAN</b>  | Mas-related G-protein coupled receptor member F               | MRGPRF   | Receptors     |
| <b>ESAM_HUMAN</b>   | Endothelial cell-selective adhesion molecule                  | ESAM     | Unclassified  |
| <b>RGMA_HUMAN</b>   | Repulsive guidance molecule A                                 | RGMA     |               |
| <b>SO4A1_HUMAN</b>  | Solute carrier organic anion transporter family member 4A1    | SLCO4A1  | Transporters  |
| <b>TMIG2_HUMAN</b>  | Transmembrane and immunoglobulin domain-containing protein 2  | TMIGD2   | Unclassified  |
| <b>T4SF18_HUMAN</b> | Transmembrane 4 L6 family member 18                           | TM4SF18  | Miscellaneous |
| <b>GPI46_HUMAN</b>  | Probable G-protein coupled receptor 146                       | GPR146   | Receptors     |
| <b>NTNG2_HUMAN</b>  | Netrin-G2                                                     | NTNG2    |               |
| <b>HAVR1_HUMAN</b>  | Hepatitis A virus cellular receptor 1                         | HAVCR1   | Unclassified  |
| <b>SHSA4_HUMAN</b>  | Protein shisa-4                                               | SHISA4   | Unclassified  |
| <b>SLAF6_HUMAN</b>  | SLAM family member 6                                          | SLAMF6   | Unclassified  |
| <b>KLRG1_HUMAN</b>  | Killer cell lectin-like receptor subfamily G member 1         | KLRG1    | Receptors     |
| <b>NTCP4_HUMAN</b>  | Sodium/bile acid cotransporter 4                              | SLC10A4  | Transporters  |
| <b>CK024_HUMAN</b>  | Uncharacterized protein C11orf24                              | C11orf24 | Unclassified  |
| <b>IL17RA_HUMAN</b> | Interleukin-17 receptor A                                     | IL17RA   | Receptors     |

|                    |                                                                                                   |          |               |
|--------------------|---------------------------------------------------------------------------------------------------|----------|---------------|
| <b>DISP1_HUMAN</b> | Protein dispatched homolog 1                                                                      | DISP1    | Unclassified  |
| <b>LIGO1_HUMAN</b> | Leucine-rich repeat and immunoglobulin-like domain-containing nogo receptor-interacting protein 1 | LINGO1   | Miscellaneous |
| <b>P3IP1_HUMAN</b> | Phosphoinositide-3-kinase-interacting protein 1                                                   | PIK3IP1  | Unclassified  |
| <b>S47A1_HUMAN</b> | Multidrug and toxin extrusion protein 1                                                           | SLC47A1  | Unclassified  |
| <b>ASIC4_HUMAN</b> | Acid-sensing ion channel 4                                                                        | ASIC4    |               |
| <b>TSN17_HUMAN</b> | Tetraspanin-17                                                                                    | TSPAN17  | Miscellaneous |
| <b>P2Y11_HUMAN</b> | P2Y purinoceptor 11                                                                               | P2RY11   | Receptors     |
| <b>SREC2_HUMAN</b> | Scavenger receptor class F member 2                                                               | SCARF2   | Receptors     |
| <b>PGCB_HUMAN</b>  | Brevican core protein                                                                             | BCAN     |               |
| <b>TECT2_HUMAN</b> | Tectonic-2                                                                                        | TCTN2    |               |
| <b>S41A3_HUMAN</b> | Solute carrier family 41 member 3                                                                 | SLC41A3  | Transporters  |
| <b>TIMD4_HUMAN</b> | T-cell immunoglobulin and mucin domain-containing protein 4                                       | TIMD4    | Unclassified  |
| <b>CA159_HUMAN</b> | Uncharacterized protein C1orf159                                                                  | C1orf159 | Unclassified  |
| <b>VSIG2_HUMAN</b> | V-set and immunoglobulin domain-containing protein 2                                              | VSIG2    | Miscellaneous |
| <b>TXD15_HUMAN</b> | Thioredoxin domain-containing protein 15                                                          | TXNDC15  | Unclassified  |
| <b>MRP9_HUMAN</b>  | Multidrug resistance-associated protein 9                                                         | ABCC12   | Transporters  |
| <b>ABCCB_HUMAN</b> | ATP-binding cassette sub-family C member 11                                                       | ABCC11   | Transporters  |
| <b>KIRRI_HUMAN</b> | Kin of IRRE-like protein 1                                                                        | KIRREL   | Miscellaneous |
| <b>LRIG1_HUMAN</b> | Leucine-rich repeats and immunoglobulin-like domains protein 1                                    | LRIG1    | Miscellaneous |
| <b>TMX3_HUMAN</b>  | Protein disulfide-isomerase TMX3                                                                  | TMX3     | Enzymes       |
| <b>CDHR1_HUMAN</b> | Cadherin-related family member 1                                                                  | CDHR1    | Miscellaneous |
| <b>PCD16_HUMAN</b> | Protocadherin-16                                                                                  | DCHS1    | Miscellaneous |
| <b>S41A2_HUMAN</b> | Solute carrier family 41 member 2                                                                 | SLC41A2  | Transporters  |
| <b>TM87B_HUMAN</b> | Transmembrane protein 87B                                                                         | TMEM87B  | Unclassified  |
| <b>GP128_HUMAN</b> | Probable G-protein coupled receptor 128                                                           | GPR128   | Receptors     |
| <b>MEG10_HUMAN</b> | Multiple epidermal growth factor-like domains protein 10                                          | MEGF10   | Receptors     |
| <b>MSLNL_HUMAN</b> | Mesothelin-like protein                                                                           | MSLNL    |               |
| <b>KCNS1_HUMAN</b> | Potassium voltage-gated channel subfamily S member 1                                              | KCNS1    | Transporters  |
| <b>O10C1_HUMAN</b> | Olfactory receptor 10C1                                                                           | OR10C1   | Receptors     |
| <b>BT2A3_HUMAN</b> | Putative butyrophilin subfamily 2 member A3                                                       | BTN2A3P  | Miscellaneous |
| <b>SUSD3_HUMAN</b> | Sushi domain-containing protein 3                                                                 | SUSD3    | Unclassified  |
| <b>FCRL2_HUMAN</b> | Fc receptor-like protein 2                                                                        | FCRL2    | Receptors     |
| <b>FCRL1_HUMAN</b> | Fc receptor-like protein 1                                                                        | FCRL1    | Receptors     |
| <b>MRGX4_HUMAN</b> | Mas-related G-protein coupled receptor member X4                                                  | MRGPRX4  | Receptors     |
| <b>MRGX3_HUMAN</b> | Mas-related G-protein coupled receptor member X3                                                  | MRGPRX3  | Receptors     |
| <b>MRGX2_HUMAN</b> | Mas-related G-protein coupled receptor member X2                                                  | MRGPRX2  | Receptors     |
| <b>MRGX1_HUMAN</b> | Mas-related G-protein coupled receptor member X1                                                  | MRGPRX1  | Receptors     |
| <b>SIG10_HUMAN</b> | Sialic acid-binding Ig-like lectin 10                                                             | SIGLEC10 | Miscellaneous |
| <b>SGCZ_HUMAN</b>  | Zeta-sarcoglycan                                                                                  | SGCZ     | Miscellaneous |
| <b>HIAT1_HUMAN</b> | Hippocampus abundant transcript 1 protein                                                         | HIAT1    | Transporters  |

|                    |                                                                          |          |               |
|--------------------|--------------------------------------------------------------------------|----------|---------------|
| <b>ROBO3_HUMAN</b> | Roundabout homolog 3                                                     | ROBO3    | Receptors     |
| <b>KREM1_HUMAN</b> | Kremen protein 1                                                         | KREMEN1  | Unclassified  |
| <b>G137A_HUMAN</b> | Integral membrane protein GPR137                                         | GPR137   | Unclassified  |
| <b>S6A18_HUMAN</b> | Sodium-dependent neutral amino acid transporter B(0)AT3                  | SLC6A18  | Transporters  |
| <b>LRFN5_HUMAN</b> | Leucine-rich repeat and fibronectin type-III domain-containing protein 5 | LRFN5    | Miscellaneous |
| <b>PTHD1_HUMAN</b> | Patched domain-containing protein 1                                      | PTCHD1   | Unclassified  |
| <b>PCFT_HUMAN</b>  | Proton-coupled folate transporter                                        | SLC46A1  | Transporters  |
| <b>CNT3B_HUMAN</b> | Contactin-associated protein-like 3B                                     | CNTNAP3B | Receptors     |
| <b>PVRL4_HUMAN</b> | Nectin-4                                                                 | PVRL4    | Receptors     |
| <b>FCRL3_HUMAN</b> | Fc receptor-like protein 3                                               | FCRL3    | Receptors     |
| <b>QRFPR_HUMAN</b> | Pyroglutamylated RFamide peptide receptor                                | QRFPR    | Receptors     |
| <b>GP101_HUMAN</b> | Probable G-protein coupled receptor 101                                  | GPR101   | Receptors     |
| <b>GPR82_HUMAN</b> | Probable G-protein coupled receptor 82                                   | GPR82    | Receptors     |
| <b>OXGR1_HUMAN</b> | 2-oxoglutarate receptor 1                                                | OXGR1    | Receptors     |
| <b>GPR78_HUMAN</b> | G-protein coupled receptor 78                                            | GPR78    | Receptors     |
| <b>GNRR2_HUMAN</b> | Putative gonadotropin-releasing hormone II receptor                      | GNRHR2   | Receptors     |
| <b>CASD1_HUMAN</b> | CAS1 domain-containing protein 1                                         | CASD1    | Unclassified  |
| <b>LRC3B_HUMAN</b> | Leucine-rich repeat-containing protein 3B                                | LRRC3B   | Miscellaneous |
| <b>DCBD2_HUMAN</b> | Discoidin, CUB and LCCL domain-containing protein 2                      | DCBLD2   | Unclassified  |
| <b>GP124_HUMAN</b> | G-protein coupled receptor 124                                           | GPR124   | Receptors     |
| <b>OPAL_HUMAN</b>  | Opalin                                                                   | OPALIN   | Unclassified  |
| <b>FCRL4_HUMAN</b> | Fc receptor-like protein 4                                               | FCRL4    | Unclassified  |
| <b>TECTB_HUMAN</b> | Beta-tectorin                                                            | TECTB    |               |
| <b>ERMAP_HUMAN</b> | Erythroid membrane-associated protein                                    | ERMAP    | Miscellaneous |
| <b>SORC2_HUMAN</b> | VPS10 domain-containing receptor SorCS2                                  | SORCS2   | Receptors     |
| <b>SIG12_HUMAN</b> | Sialic acid-binding Ig-like lectin 12                                    | SIGLEC12 | Miscellaneous |
| <b>AQP10_HUMAN</b> | Aquaporin-10                                                             | AQP10    | Transporters  |
| <b>SLIK1_HUMAN</b> | SLIT and NTRK-like protein 1                                             | SLITRK1  | Miscellaneous |
| <b>CSMD1_HUMAN</b> | CUB and sushi domain-containing protein 1                                | CSMD1    | Miscellaneous |
| <b>S38A2_HUMAN</b> | Sodium-coupled neutral amino acid transporter 2                          | SLC38A2  | Transporters  |
| <b>MYCT_HUMAN</b>  | Proton myo-inositol cotransporter                                        | SLC2A13  | Transporters  |
| <b>LR37B_HUMAN</b> | Leucine-rich repeat-containing protein 37B                               | LRRC37B  | Miscellaneous |
| <b>PCD15_HUMAN</b> | Protocadherin-15                                                         | PCDH15   | Miscellaneous |
| <b>OR5BC_HUMAN</b> | Olfactory receptor 5B12                                                  | OR5B12   | Receptors     |
| <b>OR5B2_HUMAN</b> | Olfactory receptor 5B2                                                   | OR5B2    | Receptors     |
| <b>OR2M4_HUMAN</b> | Olfactory receptor 2M4                                                   | OR2M4    | Receptors     |
| <b>OR2M2_HUMAN</b> | Olfactory receptor 2M2                                                   | OR2M2    | Receptors     |
| <b>OR2V2_HUMAN</b> | Olfactory receptor 2V2                                                   | OR2V2    | Receptors     |
| <b>OR2A7_HUMAN</b> | Olfactory receptor 2A7                                                   | OR2A7    | Receptors     |
| <b>O2A14_HUMAN</b> | Olfactory receptor 2A14                                                  | OR2A14   | Receptors     |

|                     |                                                              |          |               |
|---------------------|--------------------------------------------------------------|----------|---------------|
| <b>OR2A5_HUMAN</b>  | Olfactory receptor 2A5                                       | OR2A5    | Receptors     |
| <b>O14A2_HUMAN</b>  | Olfactory receptor 14A2                                      | OR14A2   | Receptors     |
| <b>OR4CC_HUMAN</b>  | Olfactory receptor 4C12                                      | OR4C12   | Receptors     |
| <b>OR4F4_HUMAN</b>  | Olfactory receptor 4F4                                       | OR4F4    | Receptors     |
| <b>OR4K3_HUMAN</b>  | Olfactory receptor 4K3                                       | OR4K3    | Receptors     |
| <b>OR1F2_HUMAN</b>  | Putative olfactory receptor 1F2                              | OR1F2P   | Receptors     |
| <b>OR7D2_HUMAN</b>  | Olfactory receptor 7D2                                       | OR7D2    | Receptors     |
| <b>OR5MB_HUMAN</b>  | Olfactory receptor 5M11                                      | OR5M11   | Receptors     |
| <b>OR8B4_HUMAN</b>  | Olfactory receptor 8B4                                       | OR8B4    | Receptors     |
| <b>OR8B2_HUMAN</b>  | Olfactory receptor 8B2                                       | OR8B2    | Receptors     |
| <b>OR6C1_HUMAN</b>  | Olfactory receptor 6C1                                       | OR6C1    | Receptors     |
| <b>O52B2_HUMAN</b>  | Olfactory receptor 52B2                                      | OR52B2   | Receptors     |
| <b>O52E6_HUMAN</b>  | Olfactory receptor 52E6                                      | OR52E6   | Receptors     |
| <b>PANX2_HUMAN</b>  | Pannexin-2                                                   | PANX2    | Unclassified  |
| <b>PANX1_HUMAN</b>  | Pannexin-1                                                   | PANX1    | Unclassified  |
| <b>FCRL5_HUMAN</b>  | Fc receptor-like protein 5                                   | FCRL5    | Unclassified  |
| <b>PAR4_HUMAN</b>   | Proteinase-activated receptor 4                              | F2RL3    | Receptors     |
| <b>TAAR6_HUMAN</b>  | Trace amine-associated receptor 6                            | TAAR6    | Receptors     |
| <b>TAAR9_HUMAN</b>  | Trace amine-associated receptor 9                            | TAAR9    | Receptors     |
| <b>TAAR1_HUMAN</b>  | Trace amine-associated receptor 1                            | TAAR1    | Receptors     |
| <b>SIG11_HUMAN</b>  | Sialic acid-binding Ig-like lectin 11                        | SIGLEC11 | Miscellaneous |
| <b>S26A8_HUMAN</b>  | Testis anion transporter 1                                   | SLC26A8  | Transporters  |
| <b>PCX1_HUMAN</b>   | Pecanex-like protein 1                                       | PCNX     | Unclassified  |
| <b>S22AC_HUMAN</b>  | Solute carrier family 22 member 12                           | SLC22A12 | Transporters  |
| <b>MYADM_HUMAN</b>  | Myeloid-associated differentiation marker                    | MYADM    | Miscellaneous |
| <b>SERC2_HUMAN</b>  | Serine incorporator 2                                        | SERINC2  | Transporters  |
| <b>TSN18_HUMAN</b>  | Tetraspanin-18                                               | TSPAN18  | Miscellaneous |
| <b>DIRC2_HUMAN</b>  | Disrupted in renal carcinoma protein 2                       | DIRC2    | Unclassified  |
| <b>SL9A7_HUMAN</b>  | Sodium/hydrogen exchanger 7                                  | SLC9A7   | Transporters  |
| <b>CSF3R_HUMAN</b>  | Granulocyte colony-stimulating factor receptor               | CSF3R    | Receptors     |
| <b>HBEGF_HUMAN</b>  | Proheparin-binding EGF-like growth factor                    | HBEGF    | Unclassified  |
| <b>MUC4_HUMAN</b>   | Mucin-4                                                      | MUC4     | Unclassified  |
| <b>SCN2A_HUMAN</b>  | Sodium channel protein type 2 subunit alpha                  | SCN2A    | Transporters  |
| <b>GML_HUMAN</b>    | Glycosyl-phosphatidylinositol-anchored molecule-like protein | GML      |               |
| <b>NPY6R_HUMAN</b>  | Putative neuropeptide Y receptor type 6                      | NPY6R    | Receptors     |
| <b>NOTCH4_HUMAN</b> | Neurogenic locus notch homolog protein 4                     | NOTCH4   | Receptors     |
| <b>CD180_HUMAN</b>  | CD180 antigen                                                | CD180    | Receptors     |
| <b>S1PR3_HUMAN</b>  | Sphingosine 1-phosphate receptor 3                           | S1PR3    | Receptors     |
| <b>SORT_HUMAN</b>   | Sortilin                                                     | SORT1    | Receptors     |
| <b>GPER1_HUMAN</b>  | G-protein coupled estrogen receptor 1                        | GPER1    | Receptors     |

|                       |                                                                          |          |               |
|-----------------------|--------------------------------------------------------------------------|----------|---------------|
| <b>P2RX4_HUMAN</b>    | P2X purinoceptor 4                                                       | P2RX4    | Transporters  |
| <b>P2RX7_HUMAN</b>    | P2X purinoceptor 7                                                       | P2RX7    | Transporters  |
| <b>OSMR_HUMAN</b>     | Oncostatin-M-specific receptor subunit beta                              | OSMR     | Receptors     |
| <b>IL12RB2_HUMAN</b>  | Interleukin-12 receptor subunit beta-2                                   | IL12RB2  | Receptors     |
| <b>LPAR4_HUMAN</b>    | Lysophosphatidic acid receptor 4                                         | LPAR4    | Receptors     |
| <b>GPR20_HUMAN</b>    | G-protein coupled receptor 20                                            | GPR20    | Receptors     |
| <b>GPR21_HUMAN</b>    | Probable G-protein coupled receptor 21                                   | GPR21    | Receptors     |
| <b>GPR22_HUMAN</b>    | Probable G-protein coupled receptor 22                                   | GPR22    | Receptors     |
| <b>MCHR1_HUMAN</b>    | Melanin-concentrating hormone receptor 1                                 | MCHR1    | Receptors     |
| <b>KIR2DL4_HUMAN</b>  | Killer cell immunoglobulin-like receptor 2DL4                            | KIR2DL4  | Receptors     |
| <b>ABCA3_HUMAN</b>    | ATP-binding cassette sub-family A member 3                               | ABCA3    | Transporters  |
| <b>CML1_HUMAN</b>     | Chemokine-like receptor 1                                                | CMKLR1   | Receptors     |
| <b>GPA33_HUMAN</b>    | Cell surface A33 antigen                                                 | GPA33    | Receptors     |
| <b>TM9SF2_HUMAN</b>   | Transmembrane 9 superfamily member 2                                     | TM9SF2   | Miscellaneous |
| <b>SLC29A1_HUMAN</b>  | Equilibrative nucleoside transporter 1                                   | SLC29A1  | Transporters  |
| <b>SMO_HUMAN</b>      | Smoothened homolog                                                       | SMO      | Receptors     |
| <b>SLC6A7_HUMAN</b>   | Sodium-dependent proline transporter                                     | SLC6A7   | Transporters  |
| <b>GABRG3_HUMAN</b>   | Gamma-aminobutyric acid receptor subunit gamma-3                         | GABRG3   | Transporters  |
| <b>ADAM2_HUMAN</b>    | Disintegrin and metalloproteinase domain-containing protein 2            | ADAM2    | Enzymes       |
| <b>P2Y13_HUMAN</b>    | P2Y purinoceptor 13                                                      | P2RY13   | Receptors     |
| <b>PDCD1LG2_HUMAN</b> | Programmed cell death 1 ligand 2                                         | PDCD1LG2 | Unclassified  |
| <b>HEPH_HUMAN</b>     | Hephaestin                                                               | HEPH     | Unclassified  |
| <b>CLSTN3_HUMAN</b>   | Calsyntenin-3                                                            | CLSTN3   | Miscellaneous |
| <b>MXRA8_HUMAN</b>    | Matrix-remodeling-associated protein 8                                   | MXRA8    | Unclassified  |
| <b>SLC35A5_HUMAN</b>  | Probable UDP-sugar transporter protein SLC35A5                           | SLC35A5  | Transporters  |
| <b>TTYH2_HUMAN</b>    | Protein tweety homolog 2                                                 | TTYH2    | Transporters  |
| <b>TMEM204_HUMAN</b>  | Transmembrane protein 204                                                | TMEM204  | Unclassified  |
| <b>UPK3B_HUMAN</b>    | Uroplakin-3b                                                             | UPK3B    | Miscellaneous |
| <b>LRFN3_HUMAN</b>    | Leucine-rich repeat and fibronectin type-III domain-containing protein 3 | LRFN3    | Miscellaneous |
| <b>CRB3_HUMAN</b>     | Protein crumbs homolog 3                                                 | CRB3     | Miscellaneous |
| <b>FAIM2_HUMAN</b>    | Protein lifeguard 2                                                      | FAIM2    | Unclassified  |
| <b>BOC_HUMAN</b>      | Brother of CDO                                                           | BOC      | Receptors     |
| <b>JAM3_HUMAN</b>     | Junctional adhesion molecule C                                           | JAM3     | Unclassified  |
| <b>PLVAP_HUMAN</b>    | Plasmalemma vesicle-associated protein                                   | PLVAP    | Unclassified  |
| <b>SUCNR1_HUMAN</b>   | Succinate receptor 1                                                     | SUCNR1   | Receptors     |
| <b>LGR4_HUMAN</b>     | Leucine-rich repeat-containing G-protein coupled receptor 4              | LGR4     | Receptors     |
| <b>HCAR1_HUMAN</b>    | Hydroxycarboxylic acid receptor 1                                        | HCAR1    | Receptors     |
| <b>GPR174_HUMAN</b>   | Probable G-protein coupled receptor 174                                  | GPR174   | Receptors     |
| <b>VN1R3_HUMAN</b>    | Vomerolateral type-1 receptor 3                                          | VN1R3    | Receptors     |
| <b>AMN_HUMAN</b>      | Protein amnionless                                                       | AMN      | Unclassified  |

|                    |                                                                    |          |               |
|--------------------|--------------------------------------------------------------------|----------|---------------|
| <b>CLC7A_HUMAN</b> | C-type lectin domain family 7 member A                             | CLEC7A   | Receptors     |
| <b>S12A9_HUMAN</b> | Solute carrier family 12 member 9                                  | SLC12A9  | Transporters  |
| <b>TLR10_HUMAN</b> | Toll-like receptor 10                                              | TLR10    | Receptors     |
| <b>S26A6_HUMAN</b> | Solute carrier family 26 member 6                                  | SLC26A6  | Transporters  |
| <b>CCG6_HUMAN</b>  | Voltage-dependent calcium channel gamma-6 subunit                  | CACNG6   | Transporters  |
| <b>S4A5_HUMAN</b>  | Electrogenic sodium bicarbonate cotransporter 4                    | SLC4A5   | Transporters  |
| <b>TSCOT_HUMAN</b> | Thymic stromal cotransporter homolog                               | SLC46A2  | Transporters  |
| <b>TX101_HUMAN</b> | Testis-expressed sequence 101 protein                              | TEX101   |               |
| <b>EMR3_HUMAN</b>  | EGF-like module-containing mucin-like hormone receptor-like 3      | EMR3     | Receptors     |
| <b>GPR87_HUMAN</b> | G-protein coupled receptor 87                                      | GPR87    | Receptors     |
| <b>CADM1_HUMAN</b> | Cell adhesion molecule 1                                           | CADM1    | Miscellaneous |
| <b>MFRP_HUMAN</b>  | Membrane frizzled-related protein                                  | MFRP     | Unclassified  |
| <b>TMPSD_HUMAN</b> | Transmembrane protease serine 13                                   | TMPRSS13 | Enzymes       |
| <b>CDHR2_HUMAN</b> | Cadherin-related family member 2                                   | CDHR2    | Miscellaneous |
| <b>ACE2_HUMAN</b>  | Angiotensin-converting enzyme 2                                    | ACE2     | Unclassified  |
| <b>S17A9_HUMAN</b> | Solute carrier family 17 member 9                                  | SLC17A9  | Transporters  |
| <b>ANO3_HUMAN</b>  | Anoctamin-3                                                        | ANO3     | Miscellaneous |
| <b>GTR11_HUMAN</b> | Solute carrier family 2, facilitated glucose transporter member 11 | SLC2A11  | Transporters  |
| <b>ADA33_HUMAN</b> | Disintegrin and metalloproteinase domain-containing protein 33     | ADAM33   | Enzymes       |
| <b>CNTP3_HUMAN</b> | Contactin-associated protein-like 3                                | CNTNAP3  | Receptors     |
| <b>PC11X_HUMAN</b> | Protocadherin-11 X-linked                                          | PCDH11X  | Miscellaneous |
| <b>PC11Y_HUMAN</b> | Protocadherin-11 Y-linked                                          | PCDH11Y  | Miscellaneous |
| <b>ABCA2_HUMAN</b> | ATP-binding cassette sub-family A member 2                         | ABCA2    | Transporters  |
| <b>S29A3_HUMAN</b> | Equilibrative nucleoside transporter 3                             | SLC29A3  | Transporters  |
| <b>PPAT_HUMAN</b>  | Testicular acid phosphatase                                        | ACPT     | Enzymes       |
| <b>LYNX1_HUMAN</b> | Ly-6/neurotoxin-like protein 1                                     | LYNX1    | Unclassified  |
| <b>GPR63_HUMAN</b> | Probable G-protein coupled receptor 63                             | GPR63    | Receptors     |
| <b>GPR62_HUMAN</b> | Probable G-protein coupled receptor 62                             | GPR62    | Receptors     |
| <b>GPR61_HUMAN</b> | Probable G-protein coupled receptor 61                             | GPR61    | Receptors     |
| <b>N2DL3_HUMAN</b> | NKG2D ligand 3                                                     | ULBP3    | Miscellaneous |
| <b>N2DL2_HUMAN</b> | NKG2D ligand 2                                                     | ULBP2    | Miscellaneous |
| <b>N2DL1_HUMAN</b> | NKG2D ligand 1                                                     | ULBP1    | Miscellaneous |
| <b>RTN4R_HUMAN</b> | Reticulon-4 receptor                                               | RTN4R    |               |
| <b>S19A3_HUMAN</b> | Thiamine transporter 2                                             | SLC19A3  | Transporters  |
| <b>IMPG2_HUMAN</b> | Interphotoreceptor matrix proteoglycan 2                           | IMPG2    | Unclassified  |
| <b>S13A1_HUMAN</b> | Solute carrier family 13 member 1                                  | SLC13A1  | Transporters  |
| <b>CD244_HUMAN</b> | Natural killer cell receptor 2B4                                   | CD244    | Unclassified  |
| <b>SN_HUMAN</b>    | Sialoadhesin                                                       | SIGLEC1  | Unclassified  |
| <b>CNTP4_HUMAN</b> | Contactin-associated protein-like 4                                | CNTNAP4  | Receptors     |
| <b>ZDHC5_HUMAN</b> | Palmitoyltransferase ZDHHC5                                        | ZDHHC5   | Enzymes       |



|              |                                                                         |          |               |
|--------------|-------------------------------------------------------------------------|----------|---------------|
| SEM4C_HUMAN  | Semaphorin-4C                                                           | SEMA4C   | Miscellaneous |
| TTYH3_HUMAN  | Protein tweety homolog 3                                                | TTYH3    | Transporters  |
| THSD7B_HUMAN | Thrombospondin type-1 domain-containing protein 7B                      | THSD7B   | Unclassified  |
| S39A8_HUMAN  | Zinc transporter ZIP8                                                   | SLC39A8  | Transporters  |
| 2B1E_HUMAN   | HLA class II histocompatibility antigen, DRB1-14 beta chain             | HLA-DRB1 | Miscellaneous |
| OR2B2_HUMAN  | Olfactory receptor 2B2                                                  | OR2B2    | Receptors     |
| OR2H1_HUMAN  | Olfactory receptor 2H1                                                  | OR2H1    | Receptors     |
| OR2J1_HUMAN  | Olfactory receptor 2J1                                                  | OR2J1    | Receptors     |
| O11A1_HUMAN  | Olfactory receptor 11A1                                                 | OR11A1   | Receptors     |
| OR8D2_HUMAN  | Olfactory receptor 8D2                                                  | OR8D2    | Receptors     |
| GPR88_HUMAN  | Probable G-protein coupled receptor 88                                  | GPR88    | Receptors     |
| S6A16_HUMAN  | Orphan sodium- and chloride-dependent neurotransmitter transporter NTT5 | SLC6A16  | Transporters  |
| VN1R1_HUMAN  | Vomerolnasal type-1 receptor 1                                          | VN1R1    | Receptors     |
| NMUR2_HUMAN  | Neuromedin-U receptor 2                                                 | NMUR2    | Receptors     |
| NPFF1_HUMAN  | Neuropeptide FF receptor 1                                              | NPFFR1   | Receptors     |
| MCLN1_HUMAN  | Mucolipin-1                                                             | MCOLN1   | Transporters  |
| SC5A7_HUMAN  | High affinity choline transporter 1                                     | SLC5A7   | Transporters  |
| ACH10_HUMAN  | Neuronal acetylcholine receptor subunit alpha-10                        | CHRNA10  | Transporters  |
| GFRA4_HUMAN  | GDNF family receptor alpha-4                                            | GFRA4    |               |
| ADA19_HUMAN  | Disintegrin and metalloproteinase domain-containing protein 19          | ADAM19   | Enzymes       |
| S22A4_HUMAN  | Solute carrier family 22 member 4                                       | SLC22A4  | Transporters  |
| LMA2L_HUMAN  | VIP36-like protein                                                      | LMAN2L   | Unclassified  |
| SLIK2_HUMAN  | SLIT and NTRK-like protein 2                                            | SLITRK2  | Miscellaneous |
| PCDC1_HUMAN  | Protocadherin alpha-C1                                                  | PCDHAC1  |               |
| CAD19_HUMAN  | Cadherin-19                                                             | CDH19    | Miscellaneous |
| ABCG4_HUMAN  | ATP-binding cassette sub-family G member 4                              | ABCG4    | Transporters  |
| MUC3B_HUMAN  | Mucin-3B (Fragments)                                                    | MUC3B    | Unclassified  |
| LPAR5_HUMAN  | Lysophosphatidic acid receptor 5                                        | LPAR5    | Receptors     |
| UN93B_HUMAN  | Protein unc-93 homolog B1                                               | UNC93B1  | Unclassified  |
| TRPV6_HUMAN  | Transient receptor potential cation channel subfamily V member 6        | TRPV6    | Transporters  |
| TMX4_HUMAN   | Thioredoxin-related transmembrane protein 4                             | TMX4     | Unclassified  |
| MEGF9_HUMAN  | Multiple epidermal growth factor-like domains protein 9                 | MEGF9    | Unclassified  |
| S6A17_HUMAN  | Sodium-dependent neutral amino acid transporter SLC6A17                 | SLC6A17  | Transporters  |
| OPN3_HUMAN   | Opsin-3                                                                 | OPN3     | Receptors     |
| O2AG1_HUMAN  | Olfactory receptor 2AG1                                                 | OR2AG1   | Receptors     |
| O10A5_HUMAN  | Olfactory receptor 10A5                                                 | OR10A5   | Receptors     |
| O10A2_HUMAN  | Olfactory receptor 10A2                                                 | OR10A2   | Receptors     |
| O10A4_HUMAN  | Olfactory receptor 10A4                                                 | OR10A4   | Receptors     |
| OR2D2_HUMAN  | Olfactory receptor 2D2                                                  | OR2D2    | Receptors     |
| ABCG5_HUMAN  | ATP-binding cassette sub-family G member 5                              | ABCG5    | Transporters  |

|                    |                                                               |         |               |
|--------------------|---------------------------------------------------------------|---------|---------------|
| <b>S1PR5_HUMAN</b> | Sphingosine 1-phosphate receptor 5                            | S1PR5   | Receptors     |
| <b>P2Y12_HUMAN</b> | P2Y purinoceptor 12                                           | P2RY12  | Receptors     |
| <b>CAD23_HUMAN</b> | Cadherin-23                                                   | CDH23   | Miscellaneous |
| <b>O51E2_HUMAN</b> | Olfactory receptor 51E2                                       | OR51E2  | Receptors     |
| <b>DCSTP_HUMAN</b> | Dendritic cell-specific transmembrane protein                 | DCSTAMP | Unclassified  |
| <b>CXL16_HUMAN</b> | C-X-C motif chemokine 16                                      | CXCL16  | Receptors     |
| <b>S26A1_HUMAN</b> | Sulfate anion transporter 1                                   | SLC26A1 | Transporters  |
| <b>O52A5_HUMAN</b> | Olfactory receptor 52A5                                       | OR52A5  | Receptors     |
| <b>O51V1_HUMAN</b> | Olfactory receptor 51V1                                       | OR51V1  | Receptors     |
| <b>SEM6A_HUMAN</b> | Semaphorin-6A                                                 | SEMA6A  | Miscellaneous |
| <b>S38A1_HUMAN</b> | Sodium-coupled neutral amino acid transporter 1               | SLC38A1 | Transporters  |
| <b>S6A15_HUMAN</b> | Sodium-dependent neutral amino acid transporter B(0)AT2       | SLC6A15 | Transporters  |
| <b>ADAM7_HUMAN</b> | Disintegrin and metalloproteinase domain-containing protein 7 | ADAM7   | Enzymes       |
| <b>M4A6A_HUMAN</b> | Membrane-spanning 4-domains subfamily A member 6A             | MS4A6A  | Miscellaneous |
| <b>CLC4M_HUMAN</b> | C-type lectin domain family 4 member M                        | CLEC4M  | Receptors     |
| <b>S12A5_HUMAN</b> | Solute carrier family 12 member 5                             | SLC12A5 | Transporters  |
| <b>SO5A1_HUMAN</b> | Solute carrier organic anion transporter family member 5A1    | SLCO5A1 | Transporters  |
| <b>TTYH1_HUMAN</b> | Protein tweety homolog 1                                      | TTYH1   | Transporters  |
| <b>TM245_HUMAN</b> | Transmembrane protein 245                                     | TMEM245 | Unclassified  |
| <b>O51B5_HUMAN</b> | Olfactory receptor 51B5                                       | OR51B5  | Receptors     |
| <b>O51B6_HUMAN</b> | Olfactory receptor 51B6                                       | OR51B6  | Receptors     |
| <b>O51M1_HUMAN</b> | Olfactory receptor 51M1                                       | OR51M1  | Receptors     |
| <b>O51J1_HUMAN</b> | Olfactory receptor 51J1                                       | OR51J1  | Receptors     |
| <b>O51I1_HUMAN</b> | Olfactory receptor 51I1                                       | OR51I1  | Receptors     |
| <b>O51I2_HUMAN</b> | Olfactory receptor 51I2                                       | OR51I2  | Receptors     |
| <b>O52D1_HUMAN</b> | Olfactory receptor 52D1                                       | OR52D1  | Receptors     |
| <b>HRH4_HUMAN</b>  | Histamine H4 receptor                                         | HRH4    | Receptors     |
| <b>MUC13_HUMAN</b> | Mucin-13                                                      | MUC13   | Unclassified  |
| <b>SEM4A_HUMAN</b> | Semaphorin-4A                                                 | SEMA4A  | Miscellaneous |
| <b>TMPS5_HUMAN</b> | Transmembrane protease serine 5                               | TMPS5   | Enzymes       |
| <b>SEM6C_HUMAN</b> | Semaphorin-6C                                                 | SEMA6C  | Miscellaneous |
| <b>SEM6B_HUMAN</b> | Semaphorin-6B                                                 | SEMA6B  | Miscellaneous |
| <b>LRRN3_HUMAN</b> | Leucine-rich repeat neuronal protein 3                        | LRRN3   | Miscellaneous |
| <b>FZD8_HUMAN</b>  | Frizzled-8                                                    | FZD8    | Receptors     |
| <b>DPEP2_HUMAN</b> | Dipeptidase 2                                                 | DPEP2   | Enzymes       |
| <b>DPEP3_HUMAN</b> | Dipeptidase 3                                                 | DPEP3   | Enzymes       |
| <b>CSTN2_HUMAN</b> | Calsynenin-2                                                  | CLSTN2  | Miscellaneous |
| <b>VIAAT_HUMAN</b> | Vesicular inhibitory amino acid transporter                   | SLC32A1 | Transporters  |
| <b>PIEZ2_HUMAN</b> | Piezo-type mechanosensitive ion channel component 2           | PIEZO2  | Unclassified  |
| <b>CDCP1_HUMAN</b> | CUB domain-containing protein 1                               | CDCP1   | Unclassified  |

|                    |                                                                      |            |               |
|--------------------|----------------------------------------------------------------------|------------|---------------|
| <b>SLIK6_HUMAN</b> | SLIT and NTRK-like protein 6                                         | SLITRK6    | Miscellaneous |
| <b>IGFR1_HUMAN</b> | IGF-like family receptor 1                                           | IGFLR1     | Unclassified  |
| <b>CLMP_HUMAN</b>  | CXADR-like membrane protein                                          | CLMP       | Miscellaneous |
| <b>FNDC4_HUMAN</b> | Fibronectin type III domain-containing protein 4                     | FNDC4      | Unclassified  |
| <b>TM231_HUMAN</b> | Transmembrane protein 231                                            | TMEM231    | Unclassified  |
| <b>ANTR1_HUMAN</b> | Anthrax toxin receptor 1                                             | ANTXR1     | Unclassified  |
| <b>RN167_HUMAN</b> | E3 ubiquitin-protein ligase RNF167                                   | RNF167     | Unclassified  |
| <b>LRC19_HUMAN</b> | Leucine-rich repeat-containing protein 19                            | LRRC19     | Miscellaneous |
| <b>AT133_HUMAN</b> | Probable cation-transporting ATPase 13A3                             | ATP13A3    | Transporters  |
| <b>GI24_HUMAN</b>  | Platelet receptor Gi24                                               | C10orf54   | Unclassified  |
| <b>NPAL2_HUMAN</b> | NIPA-like protein 2                                                  | NIPAL2     | Transporters  |
| <b>MANS1_HUMAN</b> | MANSC domain-containing protein 1                                    | MANSC1     | Enzymes       |
| <b>CNNM2_HUMAN</b> | Metal transporter CNNM2                                              | CNNM2      | Unclassified  |
| <b>ZDH11_HUMAN</b> | Probable palmitoyltransferase ZDHHC11                                | ZDHHC11    | Enzymes       |
| <b>MER34_HUMAN</b> | Endogenous retrovirus group MER34 member 1 Env polyprotein           | ERVMER34-1 | Miscellaneous |
| <b>CHODL_HUMAN</b> | Chondrolectin                                                        | CHODL      | Unclassified  |
| <b>FKRP_HUMAN</b>  | Fukutin-related protein                                              | FKRP       |               |
| <b>CAHM2_HUMAN</b> | Calcium homeostasis modulator protein 2                              | CALHM2     | Enzymes       |
| <b>S52A2_HUMAN</b> | Solute carrier family 52, riboflavin transporter, member 2           | SLC52A2    | Receptors     |
| <b>LPHN3_HUMAN</b> | Latrophilin-3                                                        | LPHN3      | Receptors     |
| <b>S28A3_HUMAN</b> | Solute carrier family 28 member 3                                    | SLC28A3    | Transporters  |
| <b>TNR27_HUMAN</b> | Tumor necrosis factor receptor superfamily member 27                 | EDA2R      | Receptors     |
| <b>ILRL2_HUMAN</b> | Interleukin-1 receptor-like 2                                        | IL1RL2     | Receptors     |
| <b>NMUR1_HUMAN</b> | Neuromedin-U receptor 1                                              | NMUR1      | Receptors     |
| <b>TRPV4_HUMAN</b> | Transient receptor potential cation channel subfamily V member 4     | TRPV4      | Transporters  |
| <b>CDHR5_HUMAN</b> | Cadherin-related family member 5                                     | CDHR5      | Miscellaneous |
| <b>IL21R_HUMAN</b> | Interleukin-21 receptor                                              | IL21R      | Receptors     |
| <b>LY9_HUMAN</b>   | T-lymphocyte surface antigen Ly-9                                    | LY9        | Unclassified  |
| <b>TMM27_HUMAN</b> | Collectrin                                                           | TMEM27     | Unclassified  |
| <b>LRTM1_HUMAN</b> | Leucine-rich repeat and transmembrane domain-containing protein 1    | LRTM1      | Miscellaneous |
| <b>CAD20_HUMAN</b> | Cadherin-20                                                          | CDH20      | Miscellaneous |
| <b>SACA1_HUMAN</b> | Sperm acrosome membrane-associated protein 1                         | SPACA1     | Unclassified  |
| <b>LPAR2_HUMAN</b> | Lysophosphatidic acid receptor 2                                     | LPAR2      | Receptors     |
| <b>LRRC4_HUMAN</b> | Leucine-rich repeat-containing protein 4                             | LRRC4      | Miscellaneous |
| <b>ELTD1_HUMAN</b> | EGF, latrophilin and seven transmembrane domain-containing protein 1 | ELTD1      | Receptors     |
| <b>LGR6_HUMAN</b>  | Leucine-rich repeat-containing G-protein coupled receptor 6          | LGR6       | Receptors     |
| <b>RXFP1_HUMAN</b> | Relaxin receptor 1                                                   | RXFP1      | Receptors     |
| <b>PCDH9_HUMAN</b> | Protocadherin-9                                                      | PCDH9      | Miscellaneous |
| <b>NCKX3_HUMAN</b> | Sodium/potassium/calcium exchanger 3                                 | SLC24A3    | Transporters  |
| <b>CRLF2_HUMAN</b> | Cytokine receptor-like factor 2                                      | CRLF2      | Unclassified  |

|                     |                                                            |           |               |
|---------------------|------------------------------------------------------------|-----------|---------------|
| <b>GPR35_HUMAN</b>  | G-protein coupled receptor 35                              | GPR35     | Receptors     |
| <b>GDPD2_HUMAN</b>  | Glycerophosphoinositol inositolphosphodiesterase GDPD2     | GDPD2     | Unclassified  |
| <b>ANKH_HUMAN</b>   | Progressive ankylosis protein homolog                      | ANKH      | Unclassified  |
| <b>LRC4C_HUMAN</b>  | Leucine-rich repeat-containing protein 4C                  | LRRC4C    | Miscellaneous |
| <b>ROBO2_HUMAN</b>  | Roundabout homolog 2                                       | ROBO2     | Receptors     |
| <b>PCD18_HUMAN</b>  | Protocadherin-18                                           | PCDH18    | Miscellaneous |
| <b>PLXA4_HUMAN</b>  | Plexin-A4                                                  | PLXNA4    | Receptors     |
| <b>TMM8A_HUMAN</b>  | Transmembrane protein 8A                                   | TMEM8A    | Unclassified  |
| <b>GPVI_HUMAN</b>   | Platelet glycoprotein VI                                   | GP6       | Unclassified  |
| <b>CD248_HUMAN</b>  | Endosialin                                                 | CD248     | Receptors     |
| <b>CELRS2_HUMAN</b> | Cadherin EGF LAG seven-pass G-type receptor 2              | CELSR2    | Receptors     |
| <b>AT131_HUMAN</b>  | Manganese-transporting ATPase 13A1                         | ATP13A1   | Transporters  |
| <b>PTPRH_HUMAN</b>  | Receptor-type tyrosine-protein phosphatase H               | PTPRH     | Receptors     |
| <b>TM9SF3_HUMAN</b> | Transmembrane 9 superfamily member 3                       | TM9SF3    | Miscellaneous |
| <b>NRX3B_HUMAN</b>  | Neurexin-3-beta                                            | NRXN3     | Receptors     |
| <b>ENH3_HUMAN</b>   | HERV-H_2q24.1 provirus ancestral Env polyprotein           |           | Miscellaneous |
| <b>ENH1_HUMAN</b>   | HERV-H_2q24.3 provirus ancestral Env polyprotein           |           | Miscellaneous |
| <b>S40A1_HUMAN</b>  | Solute carrier family 40 member 1                          | SLC40A1   | Transporters  |
| <b>IRPL2_HUMAN</b>  | X-linked interleukin-1 receptor accessory protein-like 2   | IL1RAPL2  | Receptors     |
| <b>ABCB9_HUMAN</b>  | ATP-binding cassette sub-family B member 9                 | ABCB9     | Transporters  |
| <b>S6A20_HUMAN</b>  | Sodium- and chloride-dependent transporter XTRP3           | SLC6A20   | Transporters  |
| <b>S39A2_HUMAN</b>  | Zinc transporter ZIP2                                      | SLC39A2   | Transporters  |
| <b>TREM1_HUMAN</b>  | Triggering receptor expressed on myeloid cells 1           | TREM1     | Receptors     |
| <b>KCNMB3_HUMAN</b> | Calcium-activated potassium channel subunit beta-3         | KCNMB3    | Transporters  |
| <b>MMP25_HUMAN</b>  | Matrix metalloproteinase-25                                | MMP25     |               |
| <b>ACKR4_HUMAN</b>  | Atypical chemokine receptor 4                              | ACKR4     | Receptors     |
| <b>LT4R2_HUMAN</b>  | Leukotriene B4 receptor 2                                  | LTB4R2    | Receptors     |
| <b>SO1B3_HUMAN</b>  | Solute carrier organic anion transporter family member 1B3 | SLCO1B3   | Transporters  |
| <b>NRN1_HUMAN</b>   | Neuritin                                                   | NRN1      |               |
| <b>CD320_HUMAN</b>  | CD320 antigen                                              | CD320     | Unclassified  |
| <b>FZD3_HUMAN</b>   | Frizzled-3                                                 | FZD3      | Receptors     |
| <b>PCD12_HUMAN</b>  | Protocadherin-12                                           | PCDH12    | Miscellaneous |
| <b>IL1AP_HUMAN</b>  | Interleukin-1 receptor accessory protein                   | IL1RAP    | Receptors     |
| <b>NOX4_HUMAN</b>   | NADPH oxidase 4                                            | NOX4      | Enzymes       |
| <b>SEMA4B_HUMAN</b> | Semaphorin-4B                                              | SEMA4B    | Miscellaneous |
| <b>GP108_HUMAN</b>  | Protein GPR108                                             | GPR108    | Unclassified  |
| <b>CN132_HUMAN</b>  | Putative uncharacterized protein C14orf132                 | C14orf132 | Unclassified  |
| <b>C1QR1_HUMAN</b>  | Complement component C1q receptor                          | CD93      | Unclassified  |
| <b>AT132_HUMAN</b>  | Probable cation-transporting ATPase 13A2                   | ATP13A2   | Transporters  |
| <b>SLAF7_HUMAN</b>  | SLAM family member 7                                       | SLAMF7    | Unclassified  |

|                     |                                                                      |          |               |
|---------------------|----------------------------------------------------------------------|----------|---------------|
| <b>TMM9B_HUMAN</b>  | Transmembrane protein 9B                                             | TMEM9B   | Unclassified  |
| <b>SS2A3_HUMAN</b>  | Solute carrier family 52, riboflavin transporter, member 3           | SLC52A3  | Receptors     |
| <b>EQTN_HUMAN</b>   | Equatorin                                                            | EQTN     | Unclassified  |
| <b>GPC5C_HUMAN</b>  | G-protein coupled receptor family C group 5 member C                 | GPC5C    | Receptors     |
| <b>ANO2_HUMAN</b>   | Anoctamin-2                                                          | ANO2     | Miscellaneous |
| <b>TRPV5_HUMAN</b>  | Transient receptor potential cation channel subfamily V member 5     | TRPV5    | Transporters  |
| <b>OR2S1_HUMAN</b>  | Olfactory receptor 2S2                                               | OR2S2    | Receptors     |
| <b>PVRL3_HUMAN</b>  | Nectin-3                                                             | PVRL3    | Receptors     |
| <b>GPR84_HUMAN</b>  | G-protein coupled receptor 84                                        | GPR84    | Receptors     |
| <b>ITM2C_HUMAN</b>  | Integral membrane protein 2C                                         | ITM2C    | Miscellaneous |
| <b>C163B_HUMAN</b>  | Scavenger receptor cysteine-rich type 1 protein M160                 | CD163L1  | Unclassified  |
| <b>DLL4_HUMAN</b>   | Delta-like protein 4                                                 | DLL4     | Miscellaneous |
| <b>TLR9_HUMAN</b>   | Toll-like receptor 9                                                 | TLR9     | Receptors     |
| <b>TLR8_HUMAN</b>   | Toll-like receptor 8                                                 | TLR8     | Receptors     |
| <b>S17A5_HUMAN</b>  | Sialin                                                               | SLC17A5  | Transporters  |
| <b>DUOX2_HUMAN</b>  | Dual oxidase 2                                                       | DUOX2    | Enzymes       |
| <b>DUOX1_HUMAN</b>  | Dual oxidase 1                                                       | DUOX1    | Enzymes       |
| <b>PCDBG_HUMAN</b>  | Protocadherin beta-16                                                | PCDHB16  | Miscellaneous |
| <b>GTR9_HUMAN</b>   | Solute carrier family 2, facilitated glucose transporter member 9    | SLC2A9   | Transporters  |
| <b>IL17RB_HUMAN</b> | Interleukin-17 receptor B                                            | IL17RB   | Receptors     |
| <b>TRYG1_HUMAN</b>  | Tryptase gamma                                                       | TPSG1    | Unclassified  |
| <b>SERC1_HUMAN</b>  | Serine incorporator 1                                                | SERINC1  | Transporters  |
| <b>THSD1_HUMAN</b>  | Thrombospondin type-1 domain-containing protein 1                    | THSD1    | Unclassified  |
| <b>RPRM_HUMAN</b>   | Protein reprim                                                       | RPRM     | Unclassified  |
| <b>GP173_HUMAN</b>  | Probable G-protein coupled receptor 173                              | GPR173   | Receptors     |
| <b>GPR27_HUMAN</b>  | Probable G-protein coupled receptor 27                               | GPR27    | Receptors     |
| <b>TNR19_HUMAN</b>  | Tumor necrosis factor receptor superfamily member 19                 | TNFRSF19 | Receptors     |
| <b>CLTR2_HUMAN</b>  | Cysteinyl leukotriene receptor 2                                     | CYSLTR2  | Receptors     |
| <b>AAA1_HUMAN</b>   | Asc-type amino acid transporter 1                                    | SLC7A10  | Transporters  |
| <b>TM7S3_HUMAN</b>  | Transmembrane 7 superfamily member 3                                 | TM7SF3   | Unclassified  |
| <b>S22AB_HUMAN</b>  | Solute carrier family 22 member 11                                   | SLC22A11 | Transporters  |
| <b>S6A13_HUMAN</b>  | Sodium- and chloride-dependent GABA transporter 2                    | SLC6A13  | Transporters  |
| <b>RL3R1_HUMAN</b>  | Relaxin-3 receptor 1                                                 | RXFP3    | Receptors     |
| <b>IGSF5_HUMAN</b>  | Immunoglobulin superfamily member 5                                  | IGSF5    | Receptors     |
| <b>TEN2_HUMAN</b>   | Teneurin-2                                                           | TENM2    | Miscellaneous |
| <b>LRC4B_HUMAN</b>  | Leucine-rich repeat-containing protein 4B                            | LRRC4B   | Miscellaneous |
| <b>PKDRE_HUMAN</b>  | Polycystic kidney disease and receptor for egg jelly-related protein | PKDREJ   | Transporters  |
| <b>SEM4G_HUMAN</b>  | Semaphorin-4G                                                        | SEMA4G   | Miscellaneous |
| <b>CXB4_HUMAN</b>   | Gap junction beta-4 protein                                          | GJB4     | Miscellaneous |
| <b>GINM1_HUMAN</b>  | Glycoprotein integral membrane protein 1                             | GINM1    | Unclassified  |

|                    |                                                                   |          |               |
|--------------------|-------------------------------------------------------------------|----------|---------------|
| <b>S39A9_HUMAN</b> | Zinc transporter ZIP9                                             | SLC39A9  | Transporters  |
| <b>T106B_HUMAN</b> | Transmembrane protein 106B                                        | TMEM106B | Unclassified  |
| <b>LMBD1_HUMAN</b> | Probable lysosomal cobalamin transporter                          | LMBRD1   | Unclassified  |
| <b>TM140_HUMAN</b> | Transmembrane protein 140                                         | TMEM140  | Unclassified  |
| <b>CC50A_HUMAN</b> | Cell cycle control protein 50A                                    | TMEM30A  | Miscellaneous |
| <b>S52A1_HUMAN</b> | Solute carrier family 52, riboflavin transporter, member 1        | SLC52A1  | Receptors     |
| <b>RHBL2_HUMAN</b> | Rhomboid-related protein 2                                        | RHBDL2   | Enzymes       |
| <b>T161A_HUMAN</b> | Transmembrane protein 161A                                        | TMEM161A | Unclassified  |
| <b>ENK13_HUMAN</b> | Endogenous retrovirus group K member 13-1 Env polyprotein         | ERVK13-1 | Miscellaneous |
| <b>SIDT1_HUMAN</b> | SID1 transmembrane family member 1                                | SIDT1    | Unclassified  |
| <b>STAB1_HUMAN</b> | Stabilin-1                                                        | STAB1    | Receptors     |
| <b>CLC5A_HUMAN</b> | C-type lectin domain family 5 member A                            | CLEC5A   | Receptors     |
| <b>CLDN1_HUMAN</b> | Claudin domain-containing protein 1                               | CLDND1   | Unclassified  |
| <b>ASIC5_HUMAN</b> | Acid-sensing ion channel 5                                        | ASIC5    | Unclassified  |
| <b>SCN3A_HUMAN</b> | Sodium channel protein type 3 subunit alpha                       | SCN3A    | Transporters  |
| <b>GTR8_HUMAN</b>  | Solute carrier family 2, facilitated glucose transporter member 8 | SLC2A8   | Transporters  |
| <b>SCN3B_HUMAN</b> | Sodium channel subunit beta-3                                     | SCN3B    | Transporters  |
| <b>VNN3_HUMAN</b>  | Vascular non-inflammatory molecule 3                              | VNN3     | Unclassified  |
| <b>SC5A4_HUMAN</b> | Low affinity sodium-glucose cotransporter                         | SLC5A4   | Transporters  |
| <b>SO1C1_HUMAN</b> | Solute carrier organic anion transporter family member 1C1        | SLCO1C1  | Transporters  |
| <b>DLL3_HUMAN</b>  | Delta-like protein 3                                              | DLL3     | Miscellaneous |
| <b>TLR7_HUMAN</b>  | Toll-like receptor 7                                              | TLR7     | Receptors     |
| <b>GPR83_HUMAN</b> | Probable G-protein coupled receptor 83                            | GPR83    | Receptors     |
| <b>CELR1_HUMAN</b> | Cadherin EGF LAG seven-pass G-type receptor 1                     | CELSR1   | Receptors     |
| <b>CELR3_HUMAN</b> | Cadherin EGF LAG seven-pass G-type receptor 3                     | CELSR3   | Receptors     |
| <b>FAT2_HUMAN</b>  | Protocadherin Fat 2                                               | FAT2     | Miscellaneous |
| <b>T2R16_HUMAN</b> | Taste receptor type 2 member 16                                   | TAS2R16  | Receptors     |
| <b>T2R14_HUMAN</b> | Taste receptor type 2 member 14                                   | TAS2R14  | Receptors     |
| <b>T2R10_HUMAN</b> | Taste receptor type 2 member 10                                   | TAS2R10  | Receptors     |
| <b>TA2R9_HUMAN</b> | Taste receptor type 2 member 9                                    | TAS2R9   | Receptors     |
| <b>TA2R8_HUMAN</b> | Taste receptor type 2 member 8                                    | TAS2R8   | Receptors     |
| <b>TA2R7_HUMAN</b> | Taste receptor type 2 member 7                                    | TAS2R7   | Receptors     |
| <b>TA2R4_HUMAN</b> | Taste receptor type 2 member 4                                    | TAS2R4   | Receptors     |
| <b>TA2R3_HUMAN</b> | Taste receptor type 2 member 3                                    | TAS2R3   | Receptors     |
| <b>TA2R1_HUMAN</b> | Taste receptor type 2 member 1                                    | TAS2R1   | Receptors     |
| <b>CALY_HUMAN</b>  | Neuron-specific vesicular protein calcyon                         | CALY     | Unclassified  |
| <b>SIGL8_HUMAN</b> | Sialic acid-binding Ig-like lectin 8                              | SIGLEC8  | Miscellaneous |
| <b>PDXL2_HUMAN</b> | Podocalyxin-like protein 2                                        | PODXL2   | Unclassified  |
| <b>NLGN3_HUMAN</b> | Neuroigin-3                                                       | NLGN3    | Miscellaneous |
| <b>TREM2_HUMAN</b> | Triggering receptor expressed on myeloid cells 2                  | TREM2    | Receptors     |

|                    |                                                                                               |          |               |
|--------------------|-----------------------------------------------------------------------------------------------|----------|---------------|
| <b>GPC5D_HUMAN</b> | G-protein coupled receptor family C group 5 member D                                          | GPC5D    | Receptors     |
| <b>GPC5B_HUMAN</b> | G-protein coupled receptor family C group 5 member B                                          | GPC5B    | Receptors     |
| <b>MYOF_HUMAN</b>  | Myoferlin                                                                                     | MYOF     | Miscellaneous |
| <b>IRPL1_HUMAN</b> | Interleukin-1 receptor accessory protein-like 1                                               | IL1RAPL1 | Receptors     |
| <b>OR6C3_HUMAN</b> | Olfactory receptor 6C3                                                                        | OR6C3    | Receptors     |
| <b>OR6C2_HUMAN</b> | Olfactory receptor 6C2                                                                        | OR6C2    | Receptors     |
| <b>O5AC2_HUMAN</b> | Olfactory receptor 5AC2                                                                       | OR5AC2   | Receptors     |
| <b>PD1L1_HUMAN</b> | Programmed cell death 1 ligand 1                                                              | CD274    | Unclassified  |
| <b>LRP1B_HUMAN</b> | Low-density lipoprotein receptor-related protein 1B                                           | LRP1B    | Receptors     |
| <b>KLRF1_HUMAN</b> | Killer cell lectin-like receptor subfamily F member 1                                         | KLRF1    | Receptors     |
| <b>FLRT3_HUMAN</b> | Leucine-rich repeat transmembrane protein FLRT3                                               | FLRT3    | Miscellaneous |
| <b>FLRT1_HUMAN</b> | Leucine-rich repeat transmembrane protein FLRT1                                               | FLRT1    | Miscellaneous |
| <b>CRIM1_HUMAN</b> | Cysteine-rich motor neuron 1 protein                                                          | CRIM1    | Unclassified  |
| <b>ADA22_HUMAN</b> | Disintegrin and metalloproteinase domain-containing protein 22                                | ADAM22   | Enzymes       |
| <b>PK2L1_HUMAN</b> | Polycystic kidney disease 2-like 1 protein                                                    | PKD2L1   | Transporters  |
| <b>TMEM9_HUMAN</b> | Transmembrane protein 9                                                                       | TMEM9    | Unclassified  |
| <b>SLAF8_HUMAN</b> | SLAM family member 8                                                                          | SLAMF8   | Unclassified  |
| <b>CAC1I_HUMAN</b> | Voltage-dependent T-type calcium channel subunit alpha-1I                                     | CACNA1I  | Transporters  |
| <b>NTRI_HUMAN</b>  | Neurotrimin                                                                                   | NTM      | Unclassified  |
| <b>CLC1B_HUMAN</b> | C-type lectin domain family 1 member B                                                        | CLEC1B   | Receptors     |
| <b>TAAR2_HUMAN</b> | Trace amine-associated receptor 2                                                             | TAAR2    | Receptors     |
| <b>OR1A1_HUMAN</b> | Olfactory receptor 1A1                                                                        | OR1A1    | Receptors     |
| <b>CSC1_HUMAN</b>  | Calcium permeable stress-gated cation channel 1                                               | TMEM63C  | Miscellaneous |
| <b>SIRPG_HUMAN</b> | Signal-regulatory protein gamma                                                               | SIRPG    | Miscellaneous |
| <b>CNTN3_HUMAN</b> | Contactin-3                                                                                   | CNTN3    | Unclassified  |
| <b>LRFN1_HUMAN</b> | Leucine-rich repeat and fibronectin type III domain-containing protein 1                      | LRFN1    | Miscellaneous |
| <b>TEN3_HUMAN</b>  | Teneurin-3                                                                                    | TENM3    | Miscellaneous |
| <b>SEM5B_HUMAN</b> | Semaphorin-5B                                                                                 | SEMA5B   | Miscellaneous |
| <b>C5AR2_HUMAN</b> | C5a anaphylatoxin chemotactic receptor 2                                                      | C5AR2    | Receptors     |
| <b>FPRP_HUMAN</b>  | Prostaglandin F2 receptor negative regulator                                                  | PTGFRN   | Unclassified  |
| <b>PCD10_HUMAN</b> | Protocadherin-10                                                                              | PCDH10   | Miscellaneous |
| <b>TUTLA_HUMAN</b> | Protein turtle homolog A                                                                      | IGSF9    | Miscellaneous |
| <b>PTHD2_HUMAN</b> | Patched domain-containing protein 2                                                           | PTCHD2   | Unclassified  |
| <b>NRX2A_HUMAN</b> | Neurexin-2                                                                                    | NRXN2    | Receptors     |
| <b>VGLU1_HUMAN</b> | Vesicular glutamate transporter 1                                                             | SLC17A7  | Transporters  |
| <b>VGLU2_HUMAN</b> | Vesicular glutamate transporter 2                                                             | SLC17A6  | Transporters  |
| <b>LRIT1_HUMAN</b> | Leucine-rich repeat, immunoglobulin-like domain and transmembrane domain-containing protein 1 | LRIT1    | Miscellaneous |
| <b>1C05_HUMAN</b>  | HLA class I histocompatibility antigen, Cw-5 alpha chain                                      | HLA-C    | Miscellaneous |
| <b>2B19_HUMAN</b>  | HLA class II histocompatibility antigen, DRB1-9 beta chain                                    | HLA-DRB1 | Miscellaneous |
| <b>RHCG_HUMAN</b>  | Ammonium transporter Rh type C                                                                | RHCG     | Transporters  |

|                    |                                                                    |           |               |
|--------------------|--------------------------------------------------------------------|-----------|---------------|
| <b>MRC2_HUMAN</b>  | C-type mannose receptor 2                                          | MRC2      | Receptors     |
| <b>P2RX2_HUMAN</b> | P2X purinoceptor 2                                                 | P2RX2     | Transporters  |
| <b>CCG4_HUMAN</b>  | Voltage-dependent calcium channel gamma-4 subunit                  | CACNG4    | Transporters  |
| <b>TR10D_HUMAN</b> | Tumor necrosis factor receptor superfamily member 10D              | TNFRSF10D | Receptors     |
| <b>GABR1_HUMAN</b> | Gamma-aminobutyric acid type B receptor subunit 1                  | GABBR1    | Receptors     |
| <b>SUCO_HUMAN</b>  | SUN domain-containing ossification factor                          | SUCO      | Unclassified  |
| <b>SL9A2_HUMAN</b> | Sodium/hydrogen exchanger 2                                        | SLC9A2    | Transporters  |
| <b>LPAR3_HUMAN</b> | Lysophosphatidic acid receptor 3                                   | LPAR3     | Receptors     |
| <b>KLOT_HUMAN</b>  | Klotho                                                             | KL        | Enzymes       |
| <b>CCG5_HUMAN</b>  | Voltage-dependent calcium channel gamma-5 subunit                  | CACNG5    | Transporters  |
| <b>EPHA6_HUMAN</b> | Ephrin type-A receptor 6                                           | EPHA6     | Receptors     |
| <b>O14J1_HUMAN</b> | Olfactory receptor 14J1                                            | OR14J1    | Receptors     |
| <b>OR5V1_HUMAN</b> | Olfactory receptor 5V1                                             | OR5V1     | Receptors     |
| <b>O12D3_HUMAN</b> | Olfactory receptor 12D3                                            | OR12D3    | Receptors     |
| <b>S23A2_HUMAN</b> | Solute carrier family 23 member 2                                  | SLC23A2   | Transporters  |
| <b>ACHA9_HUMAN</b> | Neuronal acetylcholine receptor subunit alpha-9                    | CHRNA9    | Transporters  |
| <b>CLM8_HUMAN</b>  | CMRF35-like molecule 8                                             | CD300A    | Receptors     |
| <b>GTR6_HUMAN</b>  | Solute carrier family 2, facilitated glucose transporter member 6  | SLC2A6    | Transporters  |
| <b>SUSD2_HUMAN</b> | Sushi domain-containing protein 2                                  | SUSD2     | Unclassified  |
| <b>CNTP2_HUMAN</b> | Contactin-associated protein-like 2                                | CNTNAP2   | Receptors     |
| <b>NPCL1_HUMAN</b> | Niemann-Pick C1-like protein 1                                     | NPC1L1    | Unclassified  |
| <b>I20RA_HUMAN</b> | Interleukin-20 receptor subunit alpha                              | IL20RA    | Receptors     |
| <b>S23A1_HUMAN</b> | Solute carrier family 23 member 1                                  | SLC23A1   | Transporters  |
| <b>OPN4_HUMAN</b>  | Melanopsin                                                         | OPN4      | Receptors     |
| <b>CLC2D_HUMAN</b> | C-type lectin domain family 2 member D                             | CLEC2D    | Receptors     |
| <b>S12A6_HUMAN</b> | Solute carrier family 12 member 6                                  | SLC12A6   | Transporters  |
| <b>EMR2_HUMAN</b>  | EGF-like module-containing mucin-like hormone receptor-like 2      | EMR2      | Receptors     |
| <b>SCNBA_HUMAN</b> | Sodium channel protein type 11 subunit alpha                       | SCN11A    | Transporters  |
| <b>NCKX2_HUMAN</b> | Sodium/potassium/calcium exchanger 2                               | SLC24A2   | Transporters  |
| <b>SLAF5_HUMAN</b> | SLAM family member 5                                               | CD84      | Unclassified  |
| <b>SO3A1_HUMAN</b> | Solute carrier organic anion transporter family member 3A1         | SLCO3A1   | Transporters  |
| <b>TEFF2_HUMAN</b> | Tomoregulin-2                                                      | TMEFF2    | Unclassified  |
| <b>LCAP_HUMAN</b>  | Leucyl-cystinyl aminopeptidase                                     | LNPEP     | Enzymes       |
| <b>PLXA1_HUMAN</b> | Plexin-A1                                                          | PLXNA1    | Receptors     |
| <b>GGT7_HUMAN</b>  | Gamma-glutamyltransferase 7                                        | GGT7      | Unclassified  |
| <b>GP160_HUMAN</b> | Probable G-protein coupled receptor 160                            | GPR160    | Unclassified  |
| <b>CAD22_HUMAN</b> | Cadherin-22                                                        | CDH22     | Miscellaneous |
| <b>ENPP5_HUMAN</b> | Ectonucleotide pyrophosphatase/phosphodiesterase family member 5   | ENPP5     | Enzymes       |
| <b>LAMP5_HUMAN</b> | Lysosome-associated membrane glycoprotein 5                        | LAMP5     | Unclassified  |
| <b>NAGPA_HUMAN</b> | N-acetylglucosamine-1-phosphodiester alpha-N-acetylglucosaminidase | NAGPA     | Enzymes       |



|                     |                                                                          |           |               |
|---------------------|--------------------------------------------------------------------------|-----------|---------------|
| <b>AJAP1_HUMAN</b>  | Adherens junction-associated protein 1                                   | AJAP1     | Unclassified  |
| <b>ADA30_HUMAN</b>  | Disintegrin and metalloproteinase domain-containing protein 30           | ADAM30    | Enzymes       |
| <b>ADA29_HUMAN</b>  | Disintegrin and metalloproteinase domain-containing protein 29           | ADAM29    | Enzymes       |
| <b>S13A4_HUMAN</b>  | Solute carrier family 13 member 4                                        | SLC13A4   | Transporters  |
| <b>ENK9_HUMAN</b>   | Endogenous retrovirus group K member 9 Env polyprotein                   | ERVK-9    | Miscellaneous |
| <b>PILRB_HUMAN</b>  | Paired immunoglobulin-like type 2 receptor beta                          | PILRB     | Unclassified  |
| <b>PILRA_HUMAN</b>  | Paired immunoglobulin-like type 2 receptor alpha                         | PILRA     | Unclassified  |
| <b>ADA21_HUMAN</b>  | Disintegrin and metalloproteinase domain-containing protein 21           | ADAM21    | Enzymes       |
| <b>O52A1_HUMAN</b>  | Olfactory receptor 52A1                                                  | OR52A1    | Receptors     |
| <b>CXD2_HUMAN</b>   | Gap junction delta-2 protein                                             | GJD2      | Miscellaneous |
| <b>MUC12_HUMAN</b>  | Mucin-12                                                                 | MUC12     | Unclassified  |
| <b>UR2R_HUMAN</b>   | Urotensin-2 receptor                                                     | UTS2R     | Receptors     |
| <b>ADA28_HUMAN</b>  | Disintegrin and metalloproteinase domain-containing protein 28           | ADAM28    | Enzymes       |
| <b>TRHDE_HUMAN</b>  | Thyrotropin-releasing hormone-degrading ectoenzyme                       | TRHDE     | Enzymes       |
| <b>ITA11_HUMAN</b>  | Integrin alpha-11                                                        | ITGA11    | Receptors     |
| <b>PRND_HUMAN</b>   | Prion-like protein doppel                                                | PRND      | Unclassified  |
| <b>TEN1_HUMAN</b>   | Teneurin-1                                                               | TENM1     | Miscellaneous |
| <b>TM11E_HUMAN</b>  | Transmembrane protease serine 11E                                        | TMPRSS11E | Enzymes       |
| <b>NRX1A_HUMAN</b>  | Neurexin-1                                                               | NRXN1     | Receptors     |
| <b>CADH9_HUMAN</b>  | Cadherin-9                                                               | CDH9      | Miscellaneous |
| <b>CADH7_HUMAN</b>  | Cadherin-7                                                               | CDH7      | Miscellaneous |
| <b>MUCEN_HUMAN</b>  | Endomucin                                                                | EMCN      | Unclassified  |
| <b>S39AA_HUMAN</b>  | Zinc transporter ZIP10                                                   | SLC39A10  | Transporters  |
| <b>LRFN2_HUMAN</b>  | Leucine-rich repeat and fibronectin type-III domain-containing protein 2 | LRFN2     | Miscellaneous |
| <b>HEG1_HUMAN</b>   | Protein HEG homolog 1                                                    | HEG1      | Unclassified  |
| <b>GRID1_HUMAN</b>  | Glutamate receptor ionotropic, delta-1                                   | GRID1     | Transporters  |
| <b>RN150_HUMAN</b>  | RING finger protein 150                                                  | RNF150    | Unclassified  |
| <b>PLXB3_HUMAN</b>  | Plexin-B3                                                                | PLXNB3    | Receptors     |
| <b>TPC1_HUMAN</b>   | Two pore calcium channel protein 1                                       | TPCN1     | Transporters  |
| <b>FZD4_HUMAN</b>   | Frizzled-4                                                               | FZD4      | Receptors     |
| <b>FZD10_HUMAN</b>  | Frizzled-10                                                              | FZD10     | Receptors     |
| <b>CAH14_HUMAN</b>  | Carbonic anhydrase 14                                                    | CA14      | Enzymes       |
| <b>MMP17_HUMAN</b>  | Matrix metalloproteinase-17                                              | MMP17     |               |
| <b>HHLA2_HUMAN</b>  | HERV-H LTR-associating protein 2                                         | HHLA2     | Miscellaneous |
| <b>NOTCH3_HUMAN</b> | Neurogenic locus notch homolog protein 3                                 | NOTCH3    | Receptors     |
| <b>ALK_HUMAN</b>    | ALK tyrosine kinase receptor                                             | ALK       | Unclassified  |
| <b>ICAM5_HUMAN</b>  | Intercellular adhesion molecule 5                                        | ICAM5     | Unclassified  |
| <b>S45A2_HUMAN</b>  | Membrane-associated transporter protein                                  | SLC45A2   | Transporters  |
| <b>PTPRQ_HUMAN</b>  | Phosphatidylinositol phosphatase PTPRQ                                   | PTPRQ     | Receptors     |
| <b>AT1B4_HUMAN</b>  | Protein ATP1B4                                                           | ATP1B4    | Transporters  |

|                    |                                                                               |          |               |
|--------------------|-------------------------------------------------------------------------------|----------|---------------|
| <b>PCDB8_HUMAN</b> | Protocadherin beta-8                                                          | PCDHB8   | Miscellaneous |
| <b>PCDBA_HUMAN</b> | Protocadherin beta-10                                                         | PCDHB10  | Miscellaneous |
| <b>PCDGK_HUMAN</b> | Protocadherin gamma-C3                                                        | PCDHGC3  |               |
| <b>PCDGG_HUMAN</b> | Protocadherin gamma-B4                                                        | PCDHGB4  |               |
| <b>PCDA7_HUMAN</b> | Protocadherin alpha-7                                                         | PCDHA7   |               |
| <b>PCDA6_HUMAN</b> | Protocadherin alpha-6                                                         | PCDHA6   |               |
| <b>PCDA4_HUMAN</b> | Protocadherin alpha-4                                                         | PCDHA4   |               |
| <b>PCDAC_HUMAN</b> | Protocadherin alpha-12                                                        | PCDHA12  |               |
| <b>S6A14_HUMAN</b> | Sodium- and chloride-dependent neutral and basic amino acid transporter B(0+) | SLC6A14  | Transporters  |
| <b>GBRT_HUMAN</b>  | Gamma-aminobutyric acid receptor subunit theta                                | GABRQ    | Transporters  |
| <b>EDAR_HUMAN</b>  | Tumor necrosis factor receptor superfamily member EDAR                        | EDAR     | Receptors     |
| <b>TNF18_HUMAN</b> | Tumor necrosis factor ligand superfamily member 18                            | TNFSF18  | Unclassified  |
| <b>EPCR_HUMAN</b>  | Endothelial protein C receptor                                                | PROCR    | Unclassified  |
| <b>ABCG2_HUMAN</b> | ATP-binding cassette sub-family G member 2                                    | ABCG2    | Transporters  |
| <b>GPI32_HUMAN</b> | Probable G-protein coupled receptor 132                                       | GPR132   | Receptors     |
| <b>FZD1_HUMAN</b>  | Frizzled-1                                                                    | FZD1     | Receptors     |
| <b>S12A4_HUMAN</b> | Solute carrier family 12 member 4                                             | SLC12A4  | Transporters  |
| <b>GPR34_HUMAN</b> | Probable G-protein coupled receptor 34                                        | GPR34    | Receptors     |
| <b>FLVC2_HUMAN</b> | Feline leukemia virus subgroup C receptor-related protein 2                   | FLVCR2   | Unclassified  |
| <b>NAC2_HUMAN</b>  | Sodium/calcium exchanger 2                                                    | SLC8A2   | Transporters  |
| <b>SORC3_HUMAN</b> | VPS10 domain-containing receptor SorCS3                                       | SORCS3   | Receptors     |
| <b>TUTLB_HUMAN</b> | Protein turtle homolog B                                                      | IGSF9B   | Miscellaneous |
| <b>THS7A_HUMAN</b> | Thrombospondin type-1 domain-containing protein 7A                            | THSD7A   | Unclassified  |
| <b>CNTN6_HUMAN</b> | Contactin-6                                                                   | CNTN6    | Unclassified  |
| <b>CLCA2_HUMAN</b> | Calcium-activated chloride channel regulator 2                                | CLCA2    | Unclassified  |
| <b>SCN8A_HUMAN</b> | Sodium channel protein type 8 subunit alpha                                   | SCN8A    | Transporters  |
| <b>SYCY1_HUMAN</b> | Syncyntin-1                                                                   | ERVW-1   | Miscellaneous |
| <b>NALDL_HUMAN</b> | N-acetylated-alpha-linked acidic dipeptidase-like protein                     | NAALADL1 |               |
| <b>LAMP3_HUMAN</b> | Lysosome-associated membrane glycoprotein 3                                   | LAMP3    | Receptors     |
| <b>JAG2_HUMAN</b>  | Protein jagged-2                                                              | JAG2     | Miscellaneous |
| <b>S22AD_HUMAN</b> | Solute carrier family 22 member 13                                            | SLC22A13 | Transporters  |
| <b>S22AE_HUMAN</b> | Solute carrier family 22 member 14                                            | SLC22A14 | Transporters  |
| <b>CLTR1_HUMAN</b> | Cysteinyl leukotriene receptor 1                                              | CYSLTR1  | Receptors     |
| <b>TN13B_HUMAN</b> | Tumor necrosis factor ligand superfamily member 13B                           | TNFSF13B | Unclassified  |
| <b>SIGL7_HUMAN</b> | Sialic acid-binding Ig-like lectin 7                                          | SIGLEC7  | Miscellaneous |
| <b>ITM2B_HUMAN</b> | Integral membrane protein 2B                                                  | ITM2B    | Miscellaneous |
| <b>SC5A6_HUMAN</b> | Sodium-dependent multivitamin transporter                                     | SLC5A6   | Transporters  |
| <b>TLR6_HUMAN</b>  | Toll-like receptor 6                                                          | TLR6     | Receptors     |
| <b>NTNG1_HUMAN</b> | Netrin-G1                                                                     | NTNG1    |               |
| <b>GPR52_HUMAN</b> | Probable G-protein coupled receptor 52                                        | GPR52    | Receptors     |

|                    |                                                                |          |               |
|--------------------|----------------------------------------------------------------|----------|---------------|
| <b>GPR55_HUMAN</b> | G-protein coupled receptor 55                                  | GPR55    | Receptors     |
| <b>SIGL9_HUMAN</b> | Sialic acid-binding Ig-like lectin 9                           | SIGLEC9  | Miscellaneous |
| <b>SC6A5_HUMAN</b> | Sodium- and chloride-dependent glycine transporter 2           | SLC6A5   | Transporters  |
| <b>TMED7_HUMAN</b> | Transmembrane emp24 domain-containing protein 7                | TMED7    | Miscellaneous |
| <b>OR2W1_HUMAN</b> | Olfactory receptor 2W1                                         | OR2W1    | Receptors     |
| <b>SIT1_HUMAN</b>  | Signaling threshold-regulating transmembrane adapter 1         | SIT1     | Unclassified  |
| <b>ADA18_HUMAN</b> | Disintegrin and metalloproteinase domain-containing protein 18 | ADAM18   | Enzymes       |
| <b>VPP2_HUMAN</b>  | V-type proton ATPase 116 kDa subunit a isoform 2               | ATP6V0A2 | Unclassified  |
| <b>ZAN_HUMAN</b>   | Zonadhesin                                                     | ZAN      | Unclassified  |
| <b>O10H1_HUMAN</b> | Olfactory receptor 10H1                                        | OR10H1   | Receptors     |
| <b>NRX3A_HUMAN</b> | Neurexin-3                                                     | NRXN3    | Receptors     |
| <b>DGLA_HUMAN</b>  | Sn1-specific diacylglycerol lipase alpha                       | DAGLA    | Unclassified  |
| <b>PLXD1_HUMAN</b> | Plexin-D1                                                      | PLXND1   | Receptors     |
| <b>LRP12_HUMAN</b> | Low-density lipoprotein receptor-related protein 12            | LRP12    | Receptors     |
| <b>OR1A2_HUMAN</b> | Olfactory receptor 1A2                                         | OR1A2    | Receptors     |
| <b>PCDB9_HUMAN</b> | Protocadherin beta-9                                           | PCDHB9   | Miscellaneous |
| <b>PCDB7_HUMAN</b> | Protocadherin beta-7                                           | PCDHB7   | Miscellaneous |
| <b>PCDB6_HUMAN</b> | Protocadherin beta-6                                           | PCDHB6   | Miscellaneous |
| <b>PCDB5_HUMAN</b> | Protocadherin beta-5                                           | PCDHB5   | Miscellaneous |
| <b>PCDB4_HUMAN</b> | Protocadherin beta-4                                           | PCDHB4   | Miscellaneous |
| <b>PCDB3_HUMAN</b> | Protocadherin beta-3                                           | PCDHB3   | Miscellaneous |
| <b>PCDB2_HUMAN</b> | Protocadherin beta-2                                           | PCDHB2   | Miscellaneous |
| <b>PCDBF_HUMAN</b> | Protocadherin beta-15                                          | PCDHB15  | Miscellaneous |
| <b>PCDBE_HUMAN</b> | Protocadherin beta-14                                          | PCDHB14  | Miscellaneous |
| <b>PCDBD_HUMAN</b> | Protocadherin beta-13                                          | PCDHB13  | Miscellaneous |
| <b>PCDBC_HUMAN</b> | Protocadherin beta-12                                          | PCDHB12  | Miscellaneous |
| <b>PCDBB_HUMAN</b> | Protocadherin beta-11                                          | PCDHB11  | Miscellaneous |
| <b>PCDB1_HUMAN</b> | Protocadherin beta-1                                           | PCDHB1   | Miscellaneous |
| <b>PCDGM_HUMAN</b> | Protocadherin gamma-C5                                         | PCDHGC5  | Unclassified  |
| <b>PCDGL_HUMAN</b> | Protocadherin gamma-C4                                         | PCDHGC4  | Unclassified  |
| <b>PCDGJ_HUMAN</b> | Protocadherin gamma-B7                                         | PCDHGB7  |               |
| <b>PCDGI_HUMAN</b> | Protocadherin gamma-B6                                         | PCDHGB6  |               |
| <b>PCDGH_HUMAN</b> | Protocadherin gamma-B5                                         | PCDHGB5  |               |
| <b>PCDGF_HUMAN</b> | Protocadherin gamma-B3                                         | PCDHGB3  |               |
| <b>PCDGE_HUMAN</b> | Protocadherin gamma-B2                                         | PCDHGB2  |               |
| <b>PCDGD_HUMAN</b> | Protocadherin gamma-B1                                         | PCDHGB1  |               |
| <b>PCDG9_HUMAN</b> | Protocadherin gamma-A9                                         | PCDHGA9  |               |
| <b>PCDG8_HUMAN</b> | Protocadherin gamma-A8                                         | PCDHGA8  |               |
| <b>PCDG7_HUMAN</b> | Protocadherin gamma-A7                                         | PCDHGA7  |               |
| <b>PCDG6_HUMAN</b> | Protocadherin gamma-A6                                         | PCDHGA6  |               |

|                    |                                                                  |          |               |
|--------------------|------------------------------------------------------------------|----------|---------------|
| <b>PCDG5_HUMAN</b> | Protocadherin gamma-A5                                           | PCDHGA5  | Miscellaneous |
| <b>PCDG4_HUMAN</b> | Protocadherin gamma-A4                                           | PCDHGA4  | Unclassified  |
| <b>PCDG3_HUMAN</b> | Protocadherin gamma-A3                                           | PCDHGA3  |               |
| <b>PCDG2_HUMAN</b> | Protocadherin gamma-A2                                           | PCDHGA2  |               |
| <b>PCDGB_HUMAN</b> | Protocadherin gamma-A11                                          | PCDHGA11 | Unclassified  |
| <b>PCDGA_HUMAN</b> | Protocadherin gamma-A10                                          | PCDHGA10 |               |
| <b>PCDG1_HUMAN</b> | Protocadherin gamma-A1                                           | PCDHGA1  |               |
| <b>PCDA9_HUMAN</b> | Protocadherin alpha-9                                            | PCDHA9   |               |
| <b>PCDA8_HUMAN</b> | Protocadherin alpha-8                                            | PCDHA8   |               |
| <b>PCDA5_HUMAN</b> | Protocadherin alpha-5                                            | PCDHA5   |               |
| <b>PCDA3_HUMAN</b> | Protocadherin alpha-3                                            | PCDHA3   |               |
| <b>PCDA2_HUMAN</b> | Protocadherin alpha-2                                            | PCDHA2   |               |
| <b>PCDAD_HUMAN</b> | Protocadherin alpha-13                                           | PCDHA13  |               |
| <b>PCDAB_HUMAN</b> | Protocadherin alpha-11                                           | PCDHA11  |               |
| <b>PCDAA_HUMAN</b> | Protocadherin alpha-10                                           | PCDHA10  |               |
| <b>PCDA1_HUMAN</b> | Protocadherin alpha-1                                            | PCDHA1   |               |
| <b>PCDC2_HUMAN</b> | Protocadherin alpha-C2                                           | PCDHAC2  | Unclassified  |
| <b>CLD16_HUMAN</b> | Claudin-16                                                       | CLDN16   | Miscellaneous |
| <b>HRH3_HUMAN</b>  | Histamine H3 receptor                                            | HRH3     | Receptors     |
| <b>O51B4_HUMAN</b> | Olfactory receptor 51B4                                          | OR51B4   | Receptors     |
| <b>O51B2_HUMAN</b> | Olfactory receptor 51B2                                          | OR51B2   | Receptors     |
| <b>CORIN_HUMAN</b> | Atrial natriuretic peptide-converting enzyme                     | CORIN    | Enzymes       |
| <b>TRPV2_HUMAN</b> | Transient receptor potential cation channel subfamily V member 2 | TRPV2    | Transporters  |
| <b>TNR18_HUMAN</b> | Tumor necrosis factor receptor superfamily member 18             | TNFRSF18 | Receptors     |
| <b>NPFF2_HUMAN</b> | Neuropeptide FF receptor 2                                       | NPFFR2   | Receptors     |
| <b>FLVC1_HUMAN</b> | Feline leukemia virus subgroup C receptor-related protein 1      | FLVCR1   | Unclassified  |
| <b>GPR45_HUMAN</b> | Probable G-protein coupled receptor 45                           | GPR45    | Receptors     |
| <b>PD2R2_HUMAN</b> | Prostaglandin D2 receptor 2                                      | PTGDR2   | Receptors     |
| <b>LYVE1_HUMAN</b> | Lymphatic vessel endothelial hyaluronic acid receptor 1          | LYVE1    | Unclassified  |
| <b>SCNAA_HUMAN</b> | Sodium channel protein type 10 subunit alpha                     | SCN10A   | Transporters  |
| <b>BACE2_HUMAN</b> | Beta-secretase 2                                                 | BACE2    | Enzymes       |
| <b>JAM1_HUMAN</b>  | Junctional adhesion molecule A                                   | F11R     | Miscellaneous |
| <b>GPC6_HUMAN</b>  | Glypican-6                                                       | GPC6     | Unclassified  |
| <b>NPTN_HUMAN</b>  | Neuroplastin                                                     | NPTN     | Unclassified  |
| <b>GPR56_HUMAN</b> | G-protein coupled receptor 56                                    | GPR56    | Receptors     |
| <b>S12A7_HUMAN</b> | Solute carrier family 12 member 7                                | SLC12A7  | Transporters  |
| <b>KCMB2_HUMAN</b> | Calcium-activated potassium channel subunit beta-2               | KCNMB2   | Transporters  |
| <b>S22A7_HUMAN</b> | Solute carrier family 22 member 7                                | SLC22A7  | Transporters  |
| <b>CCG2_HUMAN</b>  | Voltage-dependent calcium channel gamma-2 subunit                | CACNG2   | Transporters  |
| <b>MRVII_HUMAN</b> | Protein MRVII                                                    | MRVII    | Unclassified  |

|                    |                                                            |           |               |
|--------------------|------------------------------------------------------------|-----------|---------------|
| <b>CXA3_HUMAN</b>  | Gap junction alpha-3 protein                               | GJA3      | Miscellaneous |
| <b>SO1B1_HUMAN</b> | Solute carrier organic anion transporter family member 1B1 | SLCO1B1   | Transporters  |
| <b>TEST_HUMAN</b>  | Testisin                                                   | PRSS21    |               |
| <b>ZNT1_HUMAN</b>  | Zinc transporter 1                                         | SLC30A1   | Transporters  |
| <b>S4A7_HUMAN</b>  | Sodium bicarbonate cotransporter 3                         | SLC4A7    | Transporters  |
| <b>ROBO1_HUMAN</b> | Roundabout homolog 1                                       | ROBO1     | Receptors     |
| <b>CAD10_HUMAN</b> | Cadherin-10                                                | CDH10     | Miscellaneous |
| <b>TNR11_HUMAN</b> | Tumor necrosis factor receptor superfamily member 11A      | TNFRSF11A | Receptors     |
| <b>S4A4_HUMAN</b>  | Electrogenic sodium bicarbonate cotransporter 1            | SLC4A4    | Transporters  |
| <b>ICOS_HUMAN</b>  | Inducible T-cell costimulator                              | ICOS      | Unclassified  |
| <b>ENPP4_HUMAN</b> | Bis(5'-adenosyl)-triphosphatase ENPP4                      | ENPP4     | Enzymes       |

**Supplementary Table S2.** List of differentially expressed genes with a quasi H-score  $\geq 150$  per tumor type

| Gene name | Cancer               | High | Medium | Low | Not detected | Sum | Quasi H-Score |
|-----------|----------------------|------|--------|-----|--------------|-----|---------------|
| ABCA2     | glioma               | 5    | 6      | 0   | 0            | 11  | 245.45        |
| ABCA2     | head and neck cancer | 1    | 3      | 0   | 0            | 4   | 225           |
| ABCA2     | thyroid cancer       | 1    | 3      | 0   | 0            | 4   | 225           |
| ABCA2     | melanoma             | 2    | 10     | 0   | 0            | 12  | 216.67        |
| ABCA2     | ovarian cancer       | 1    | 11     | 0   | 0            | 12  | 208.33        |
| ABCA2     | breast cancer        | 0    | 10     | 0   | 0            | 10  | 200           |
| ABCA2     | endometrial cancer   | 1    | 9      | 1   | 0            | 11  | 200           |
| ABCA2     | pancreatic cancer    | 0    | 10     | 0   | 0            | 10  | 200           |
| ABCA2     | prostate cancer      | 0    | 12     | 0   | 0            | 12  | 200           |
| ABCA2     | skin cancer          | 0    | 11     | 0   | 0            | 11  | 200           |
| ABCA2     | stomach cancer       | 0    | 10     | 0   | 0            | 10  | 200           |
| ABCA2     | testis cancer        | 0    | 11     | 0   | 0            | 11  | 200           |
| ABCA2     | cervical cancer      | 0    | 11     | 1   | 0            | 12  | 191.67        |
| ABCA2     | lung cancer          | 0    | 11     | 1   | 0            | 12  | 191.67        |
| ABCA2     | liver cancer         | 0    | 9      | 2   | 0            | 11  | 181.82        |
| ABCA2     | urothelial cancer    | 1    | 8      | 1   | 1            | 11  | 181.82        |
| ABCA2     | carcinoid            | 1    | 2      | 0   | 1            | 4   | 175           |
| ABCA2     | renal cancer         | 0    | 8      | 4   | 0            | 12  | 166.67        |
| ABCA2     | lymphoma             | 0    | 8      | 2   | 2            | 12  | 150           |
| ABCB1     | liver cancer         | 1    | 6      | 1   | 2            | 10  | 160           |
| ABCB9     | testis cancer        | 0    | 10     | 2   | 0            | 12  | 183.33        |
| ABCB9     | colorectal cancer    | 0    | 9      | 3   | 0            | 12  | 175           |
| ABCB9     | breast cancer        | 0    | 8      | 4   | 0            | 12  | 166.67        |
| ABCC10    | thyroid cancer       | 0    | 4      | 0   | 0            | 4   | 200           |
| ABCC10    | renal cancer         | 2    | 8      | 1   | 1            | 12  | 191.67        |
| ABCC10    | prostate cancer      | 0    | 7      | 4   | 0            | 11  | 163.64        |
| ABCC10    | ovarian cancer       | 2    | 3      | 6   | 1            | 12  | 150           |
| ABCC11    | thyroid cancer       | 2    | 2      | 0   | 0            | 4   | 250           |
| ABCC11    | urothelial cancer    | 5    | 3      | 3   | 0            | 11  | 218.18        |
| ABCC11    | liver cancer         | 5    | 4      | 3   | 0            | 12  | 216.67        |
| ABCC11    | breast cancer        | 2    | 8      | 1   | 0            | 11  | 209.09        |
| ABCC11    | colorectal cancer    | 2    | 8      | 1   | 0            | 11  | 209.09        |
| ABCC11    | endometrial cancer   | 2    | 8      | 2   | 0            | 12  | 200           |
| ABCC11    | head and neck cancer | 0    | 4      | 0   | 0            | 4   | 200           |
| ABCC11    | stomach cancer       | 0    | 10     | 0   | 0            | 10  | 200           |
| ABCC11    | pancreatic cancer    | 0    | 11     | 1   | 0            | 12  | 191.67        |
| ABCC11    | ovarian cancer       | 1    | 8      | 3   | 0            | 12  | 183.33        |
| ABCC11    | skin cancer          | 1    | 8      | 3   | 0            | 12  | 183.33        |

|        |                      |    |    |   |   |    |        |
|--------|----------------------|----|----|---|---|----|--------|
| ABCC11 | lung cancer          | 3  | 5  | 2 | 2 | 12 | 175    |
| ABCC11 | carcinoid            | 0  | 3  | 1 | 0 | 4  | 175    |
| ABCC11 | prostate cancer      | 0  | 9  | 3 | 0 | 12 | 175    |
| ABCC11 | testis cancer        | 0  | 7  | 4 | 0 | 11 | 163.64 |
| ABCC11 | melanoma             | 0  | 7  | 3 | 1 | 11 | 154.55 |
| ACVR1B | liver cancer         | 4  | 4  | 1 | 2 | 11 | 190.91 |
| ADAM15 | liver cancer         | 1  | 9  | 2 | 0 | 12 | 191.67 |
| ADAM15 | melanoma             | 2  | 5  | 5 | 0 | 12 | 175    |
| ADAM15 | colorectal cancer    | 0  | 9  | 3 | 0 | 12 | 175    |
| ADAM15 | thyroid cancer       | 0  | 2  | 1 | 0 | 3  | 166.67 |
| ADAM15 | pancreatic cancer    | 0  | 7  | 4 | 0 | 11 | 163.64 |
| ADAM15 | prostate cancer      | 0  | 6  | 4 | 0 | 10 | 160    |
| ADAM15 | breast cancer        | 0  | 7  | 5 | 0 | 12 | 158.33 |
| ADAM15 | testis cancer        | 0  | 7  | 5 | 0 | 12 | 158.33 |
| ADAM17 | colorectal cancer    | 8  | 4  | 0 | 0 | 12 | 266.67 |
| ADAM17 | carcinoid            | 2  | 2  | 0 | 0 | 4  | 250    |
| ADAM17 | endometrial cancer   | 4  | 3  | 4 | 0 | 11 | 200    |
| ADAM17 | testis cancer        | 2  | 4  | 6 | 0 | 12 | 166.67 |
| ADAM17 | pancreatic cancer    | 1  | 3  | 4 | 0 | 8  | 162.5  |
| ADAM17 | lung cancer          | 2  | 5  | 3 | 2 | 12 | 158.33 |
| ADAM17 | urothelial cancer    | 1  | 5  | 6 | 0 | 12 | 158.33 |
| ADAM17 | ovarian cancer       | 3  | 3  | 4 | 2 | 12 | 158.33 |
| ADAM17 | glioma               | 0  | 8  | 2 | 2 | 12 | 150    |
| ADAM17 | head and neck cancer | 0  | 2  | 2 | 0 | 4  | 150    |
| ADAM17 | stomach cancer       | 4  | 1  | 4 | 3 | 12 | 150    |
| ADAM23 | carcinoid            | 0  | 4  | 0 | 0 | 4  | 200    |
| ADAM23 | thyroid cancer       | 1  | 2  | 1 | 0 | 4  | 200    |
| ADAM23 | breast cancer        | 0  | 9  | 3 | 0 | 12 | 175    |
| ADAM23 | ovarian cancer       | 1  | 4  | 7 | 0 | 12 | 150    |
| ADAM33 | thyroid cancer       | 0  | 4  | 0 | 0 | 4  | 200    |
| ADAM8  | colorectal cancer    | 0  | 11 | 1 | 0 | 12 | 191.67 |
| ADAM8  | endometrial cancer   | 0  | 8  | 2 | 0 | 10 | 180    |
| ADAM8  | stomach cancer       | 0  | 7  | 4 | 1 | 12 | 150    |
| ADAM8  | thyroid cancer       | 0  | 2  | 2 | 0 | 4  | 150    |
| ADCY2  | prostate cancer      | 10 | 1  | 0 | 0 | 11 | 290.91 |
| ADCY2  | breast cancer        | 4  | 6  | 2 | 0 | 12 | 216.67 |
| ADCY2  | carcinoid            | 0  | 2  | 0 | 0 | 2  | 200    |
| ADCY2  | endometrial cancer   | 1  | 9  | 1 | 0 | 11 | 200    |
| ADCY2  | colorectal cancer    | 0  | 10 | 1 | 0 | 11 | 190.91 |
| ADCY2  | liver cancer         | 2  | 8  | 0 | 2 | 12 | 183.33 |

|         |                      |    |   |   |   |    |        |
|---------|----------------------|----|---|---|---|----|--------|
| ADCY2   | thyroid cancer       | 0  | 3 | 1 | 0 | 4  | 175    |
| ADCY2   | pancreatic cancer    | 1  | 6 | 2 | 1 | 10 | 170    |
| ADCY2   | melanoma             | 0  | 7 | 2 | 1 | 10 | 160    |
| ADCY2   | renal cancer         | 1  | 5 | 6 | 0 | 12 | 158.33 |
| ADCY3   | prostate cancer      | 12 | 0 | 0 | 0 | 12 | 300    |
| ADCY3   | renal cancer         | 0  | 7 | 5 | 0 | 12 | 158.33 |
| ADCY6   | liver cancer         | 2  | 6 | 2 | 1 | 11 | 181.82 |
| ADCY6   | breast cancer        | 1  | 4 | 7 | 0 | 12 | 150    |
| ADCY9   | colorectal cancer    | 0  | 9 | 2 | 0 | 11 | 181.82 |
| ADCY9   | head and neck cancer | 0  | 3 | 1 | 0 | 4  | 175    |
| ADCY9   | melanoma             | 0  | 8 | 4 | 0 | 12 | 166.67 |
| ADCY9   | testis cancer        | 0  | 8 | 3 | 1 | 12 | 158.33 |
| ADCY9   | pancreatic cancer    | 0  | 4 | 4 | 0 | 8  | 150    |
| ALK     | skin cancer          | 4  | 1 | 4 | 1 | 10 | 180    |
| ALK     | prostate cancer      | 1  | 6 | 4 | 1 | 12 | 158.33 |
| ALPL    | testis cancer        | 4  | 3 | 1 | 3 | 11 | 172.73 |
| ANO1    | liver cancer         | 7  | 2 | 0 | 3 | 12 | 208.33 |
| ANO1    | stomach cancer       | 3  | 4 | 0 | 2 | 9  | 188.89 |
| ANO7    | prostate cancer      | 9  | 0 | 0 | 2 | 11 | 245.45 |
| ANO9    | head and neck cancer | 1  | 1 | 1 | 0 | 3  | 200    |
| ANO9    | breast cancer        | 6  | 0 | 3 | 2 | 11 | 190.91 |
| ANO9    | melanoma             | 2  | 6 | 3 | 0 | 11 | 190.91 |
| ANO9    | ovarian cancer       | 2  | 7 | 2 | 1 | 12 | 183.33 |
| ANO9    | renal cancer         | 3  | 4 | 1 | 4 | 12 | 150    |
| AQP5    | endometrial cancer   | 4  | 6 | 2 | 0 | 12 | 216.67 |
| AQP5    | pancreatic cancer    | 3  | 2 | 0 | 3 | 8  | 162.5  |
| AQP8    | prostate cancer      | 3  | 4 | 3 | 0 | 10 | 200    |
| ATP13A1 | thyroid cancer       | 0  | 4 | 0 | 0 | 4  | 200    |
| ATP13A1 | colorectal cancer    | 1  | 8 | 3 | 0 | 12 | 183.33 |
| ATP1B3  | skin cancer          | 0  | 9 | 2 | 0 | 11 | 181.82 |
| ATP1B3  | thyroid cancer       | 0  | 3 | 1 | 0 | 4  | 175    |
| ATP1B3  | stomach cancer       | 0  | 7 | 3 | 0 | 10 | 170    |
| ATP1B3  | pancreatic cancer    | 0  | 8 | 4 | 0 | 12 | 166.67 |
| ATP1B3  | lung cancer          | 0  | 6 | 6 | 0 | 12 | 150    |
| ATP2B2  | glioma               | 0  | 9 | 1 | 0 | 10 | 190    |
| ATP2B2  | thyroid cancer       | 0  | 3 | 1 | 0 | 4  | 175    |
| ATP2B2  | carcinoid            | 0  | 2 | 1 | 0 | 3  | 166.67 |
| ATP2B2  | endometrial cancer   | 0  | 7 | 4 | 0 | 11 | 163.64 |
| ATP2B2  | liver cancer         | 1  | 5 | 5 | 1 | 12 | 150    |
| ATRN    | prostate cancer      | 1  | 7 | 4 | 0 | 12 | 175    |



|                 |                      |    |    |   |   |    |        |
|-----------------|----------------------|----|----|---|---|----|--------|
| <b>BACE1</b>    | colorectal cancer    | 9  | 3  | 0 | 0 | 12 | 275    |
| <b>BACE1</b>    | liver cancer         | 8  | 3  | 0 | 0 | 11 | 272.73 |
| <b>BACE1</b>    | melanoma             | 8  | 4  | 0 | 0 | 12 | 266.67 |
| <b>BACE1</b>    | endometrial cancer   | 6  | 6  | 0 | 0 | 12 | 250    |
| <b>BACE1</b>    | testis cancer        | 5  | 5  | 0 | 0 | 10 | 250    |
| <b>BACE1</b>    | lung cancer          | 4  | 4  | 1 | 0 | 9  | 233.33 |
| <b>BACE1</b>    | thyroid cancer       | 2  | 0  | 1 | 0 | 3  | 233.33 |
| <b>BACE1</b>    | lymphoma             | 2  | 9  | 0 | 0 | 11 | 218.18 |
| <b>BACE1</b>    | pancreatic cancer    | 3  | 7  | 1 | 0 | 11 | 218.18 |
| <b>BACE1</b>    | stomach cancer       | 3  | 7  | 1 | 0 | 11 | 218.18 |
| <b>BACE1</b>    | ovarian cancer       | 2  | 9  | 1 | 0 | 12 | 208.33 |
| <b>BACE1</b>    | glioma               | 1  | 8  | 1 | 0 | 10 | 200    |
| <b>BACE1</b>    | prostate cancer      | 1  | 10 | 1 | 0 | 12 | 200    |
| <b>BACE1</b>    | urothelial cancer    | 2  | 7  | 3 | 0 | 12 | 191.67 |
| <b>BACE1</b>    | breast cancer        | 2  | 6  | 4 | 0 | 12 | 183.33 |
| <b>BACE1</b>    | cervical cancer      | 4  | 3  | 4 | 1 | 12 | 183.33 |
| <b>BACE1</b>    | renal cancer         | 1  | 8  | 1 | 2 | 12 | 166.67 |
| <b>BACE2</b>    | prostate cancer      | 0  | 7  | 1 | 2 | 10 | 150    |
| <b>BAMBI</b>    | prostate cancer      | 1  | 9  | 0 | 2 | 12 | 175    |
| <b>BAMBI</b>    | colorectal cancer    | 0  | 7  | 5 | 0 | 12 | 158.33 |
| <b>C11orf24</b> | thyroid cancer       | 0  | 3  | 0 | 0 | 3  | 200    |
| <b>CALCR</b>    | prostate cancer      | 0  | 10 | 1 | 1 | 12 | 175    |
| <b>CCR2</b>     | skin cancer          | 8  | 1  | 1 | 1 | 11 | 245.45 |
| <b>CCR2</b>     | head and neck cancer | 2  | 1  | 0 | 1 | 4  | 200    |
| <b>CCR3</b>     | liver cancer         | 5  | 2  | 0 | 5 | 12 | 158.33 |
| <b>CCR9</b>     | breast cancer        | 12 | 0  | 0 | 0 | 12 | 300    |
| <b>CCR9</b>     | thyroid cancer       | 4  | 0  | 0 | 0 | 4  | 300    |
| <b>CCR9</b>     | pancreatic cancer    | 10 | 0  | 1 | 0 | 11 | 281.82 |
| <b>CCR9</b>     | renal cancer         | 10 | 1  | 1 | 0 | 12 | 275    |
| <b>CCR9</b>     | endometrial cancer   | 9  | 1  | 1 | 0 | 11 | 272.73 |
| <b>CCR9</b>     | ovarian cancer       | 10 | 0  | 2 | 0 | 12 | 266.67 |
| <b>CCR9</b>     | prostate cancer      | 8  | 4  | 0 | 0 | 12 | 266.67 |
| <b>CCR9</b>     | urothelial cancer    | 8  | 2  | 1 | 0 | 11 | 263.64 |
| <b>CCR9</b>     | cervical cancer      | 7  | 4  | 1 | 0 | 12 | 250    |
| <b>CCR9</b>     | stomach cancer       | 7  | 4  | 1 | 0 | 12 | 250    |
| <b>CCR9</b>     | testis cancer        | 6  | 4  | 1 | 0 | 11 | 245.45 |
| <b>CCR9</b>     | lung cancer          | 6  | 2  | 2 | 0 | 10 | 240    |
| <b>CCR9</b>     | skin cancer          | 6  | 4  | 0 | 1 | 11 | 236.36 |
| <b>CCR9</b>     | liver cancer         | 6  | 2  | 1 | 1 | 10 | 230    |
| <b>CCR9</b>     | glioma               | 5  | 4  | 2 | 0 | 11 | 227.27 |

|       |                      |   |   |   |   |    |        |
|-------|----------------------|---|---|---|---|----|--------|
| CCR9  | carcinoid            | 2 | 1 | 1 | 0 | 4  | 225    |
| CCR9  | melanoma             | 4 | 5 | 2 | 0 | 11 | 218.18 |
| CCR9  | head and neck cancer | 1 | 1 | 2 | 0 | 4  | 175    |
| CCR9  | colorectal cancer    | 3 | 1 | 7 | 0 | 11 | 163.64 |
| CD101 | thyroid cancer       | 1 | 2 | 1 | 0 | 4  | 200    |
| CD101 | melanoma             | 0 | 7 | 5 | 0 | 12 | 158.33 |
| CD19  | lymphoma             | 5 | 3 | 0 | 3 | 11 | 190.91 |
| CD1B  | prostate cancer      | 6 | 2 | 0 | 0 | 8  | 275    |
| CD1B  | thyroid cancer       | 2 | 1 | 0 | 0 | 3  | 266.67 |
| CD1B  | liver cancer         | 5 | 5 | 1 | 1 | 12 | 216.67 |
| CD1B  | head and neck cancer | 0 | 2 | 1 | 0 | 3  | 166.67 |
| CD1B  | lung cancer          | 0 | 6 | 2 | 1 | 9  | 155.56 |
| CD276 | skin cancer          | 7 | 4 | 1 | 0 | 12 | 250    |
| CD276 | endometrial cancer   | 4 | 5 | 1 | 0 | 10 | 230    |
| CD276 | head and neck cancer | 1 | 3 | 0 | 0 | 4  | 225    |
| CD276 | prostate cancer      | 3 | 9 | 0 | 0 | 12 | 225    |
| CD276 | melanoma             | 2 | 9 | 1 | 0 | 12 | 208.33 |
| CD276 | glioma               | 4 | 2 | 6 | 0 | 12 | 183.33 |
| CD276 | lung cancer          | 2 | 6 | 4 | 0 | 12 | 183.33 |
| CD276 | urothelial cancer    | 1 | 8 | 3 | 0 | 12 | 183.33 |
| CD276 | breast cancer        | 1 | 7 | 4 | 0 | 12 | 175    |
| CD276 | pancreatic cancer    | 2 | 4 | 6 | 0 | 12 | 166.67 |
| CD276 | stomach cancer       | 1 | 4 | 5 | 0 | 10 | 160    |
| CD276 | ovarian cancer       | 2 | 3 | 7 | 0 | 12 | 158.33 |
| CD276 | cervical cancer      | 0 | 7 | 4 | 1 | 12 | 150    |
| CD33  | colorectal cancer    | 1 | 7 | 4 | 0 | 12 | 175    |
| CD37  | lymphoma             | 6 | 3 | 3 | 0 | 12 | 225    |
| CD3D  | lymphoma             | 4 | 5 | 0 | 3 | 12 | 183.33 |
| CD3G  | thyroid cancer       | 1 | 2 | 0 | 0 | 3  | 233.33 |
| CD47  | ovarian cancer       | 6 | 2 | 2 | 1 | 11 | 218.18 |
| CD47  | thyroid cancer       | 1 | 2 | 0 | 1 | 4  | 175    |
| CD53  | stomach cancer       | 1 | 6 | 1 | 0 | 8  | 200    |
| CD53  | thyroid cancer       | 0 | 2 | 0 | 0 | 2  | 200    |
| CD53  | glioma               | 0 | 7 | 2 | 0 | 9  | 177.78 |
| CD53  | lymphoma             | 4 | 3 | 3 | 2 | 12 | 175    |
| CD53  | pancreatic cancer    | 0 | 8 | 3 | 0 | 11 | 172.73 |
| CD53  | colorectal cancer    | 0 | 6 | 5 | 0 | 11 | 154.55 |
| CD53  | liver cancer         | 0 | 6 | 6 | 0 | 12 | 150    |
| CD63  | melanoma             | 7 | 3 | 2 | 0 | 12 | 241.67 |
| CD63  | prostate cancer      | 0 | 6 | 6 | 0 | 12 | 150    |

|        |                      |    |    |   |   |    |        |
|--------|----------------------|----|----|---|---|----|--------|
| CD74   | lymphoma             | 0  | 9  | 0 | 0 | 9  | 200    |
| CD74   | endometrial cancer   | 1  | 6  | 3 | 0 | 10 | 180    |
| CD74   | thyroid cancer       | 0  | 3  | 1 | 0 | 4  | 175    |
| CD74   | head and neck cancer | 0  | 3  | 0 | 1 | 4  | 150    |
| CD79A  | lymphoma             | 10 | 0  | 0 | 2 | 12 | 250    |
| CD79B  | lymphoma             | 5  | 4  | 3 | 0 | 12 | 216.67 |
| CD83   | lymphoma             | 1  | 8  | 1 | 0 | 10 | 200    |
| CD86   | colorectal cancer    | 0  | 10 | 0 | 0 | 10 | 200    |
| CD86   | lymphoma             | 5  | 3  | 2 | 2 | 12 | 191.67 |
| CD86   | stomach cancer       | 4  | 2  | 5 | 1 | 12 | 175    |
| CD86   | testis cancer        | 2  | 4  | 5 | 1 | 12 | 158.33 |
| CD86   | thyroid cancer       | 0  | 2  | 2 | 0 | 4  | 150    |
| CDCP1  | colorectal cancer    | 1  | 9  | 2 | 0 | 12 | 191.67 |
| CDCP1  | pancreatic cancer    | 2  | 5  | 2 | 3 | 12 | 150    |
| CDCP1  | endometrial cancer   | 0  | 8  | 2 | 2 | 12 | 150    |
| CDH11  | thyroid cancer       | 1  | 1  | 0 | 1 | 3  | 166.67 |
| CDH18  | carcinoid            | 0  | 2  | 2 | 0 | 4  | 150    |
| CDH20  | cervical cancer      | 5  | 4  | 3 | 0 | 12 | 216.67 |
| CDH20  | colorectal cancer    | 3  | 8  | 1 | 0 | 12 | 216.67 |
| CDH20  | prostate cancer      | 4  | 6  | 2 | 0 | 12 | 216.67 |
| CDH20  | ovarian cancer       | 4  | 5  | 3 | 0 | 12 | 208.33 |
| CDH20  | head and neck cancer | 1  | 1  | 1 | 0 | 3  | 200    |
| CDH20  | thyroid cancer       | 1  | 1  | 1 | 0 | 3  | 200    |
| CDH20  | urothelial cancer    | 0  | 11 | 1 | 0 | 12 | 191.67 |
| CDH20  | pancreatic cancer    | 1  | 7  | 3 | 0 | 11 | 181.82 |
| CDH20  | lung cancer          | 2  | 5  | 2 | 1 | 10 | 180    |
| CDH20  | stomach cancer       | 1  | 7  | 4 | 0 | 12 | 175    |
| CDH20  | breast cancer        | 0  | 8  | 4 | 0 | 12 | 166.67 |
| CDH20  | carcinoid            | 0  | 2  | 1 | 0 | 3  | 166.67 |
| CDH20  | endometrial cancer   | 1  | 5  | 6 | 0 | 12 | 158.33 |
| CDH20  | renal cancer         | 0  | 7  | 4 | 1 | 12 | 150    |
| CDH5   | breast cancer        | 3  | 7  | 1 | 1 | 12 | 200    |
| CDH8   | colorectal cancer    | 5  | 6  | 0 | 0 | 11 | 245.45 |
| CELSR3 | colorectal cancer    | 3  | 8  | 1 | 0 | 12 | 216.67 |
| CELSR3 | carcinoid            | 0  | 3  | 1 | 0 | 4  | 175    |
| CELSR3 | stomach cancer       | 0  | 8  | 3 | 0 | 11 | 172.73 |
| CELSR3 | liver cancer         | 0  | 8  | 1 | 2 | 11 | 154.55 |
| CELSR3 | testis cancer        | 1  | 5  | 5 | 1 | 12 | 150    |
| CHPT1  | breast cancer        | 0  | 7  | 2 | 1 | 10 | 160    |
| CHPT1  | thyroid cancer       | 0  | 2  | 2 | 0 | 4  | 150    |

|               |                      |   |    |   |   |    |        |
|---------------|----------------------|---|----|---|---|----|--------|
| <b>CHRNA7</b> | thyroid cancer       | 1 | 3  | 0 | 0 | 4  | 225    |
| <b>CHRNA7</b> | colorectal cancer    | 2 | 8  | 1 | 0 | 11 | 209.09 |
| <b>CHRNA7</b> | melanoma             | 5 | 5  | 0 | 2 | 12 | 208.33 |
| <b>CHRNA7</b> | carcinoid            | 0 | 4  | 0 | 0 | 4  | 200    |
| <b>CHRNA7</b> | head and neck cancer | 0 | 4  | 0 | 0 | 4  | 200    |
| <b>CHRNA7</b> | ovarian cancer       | 2 | 7  | 2 | 0 | 11 | 200    |
| <b>CHRNA7</b> | stomach cancer       | 1 | 6  | 1 | 0 | 8  | 200    |
| <b>CHRNA7</b> | urothelial cancer    | 3 | 5  | 2 | 1 | 11 | 190.91 |
| <b>CHRNA7</b> | glioma               | 0 | 8  | 1 | 0 | 9  | 188.89 |
| <b>CHRNA7</b> | liver cancer         | 0 | 10 | 2 | 0 | 12 | 183.33 |
| <b>CHRNA7</b> | endometrial cancer   | 1 | 9  | 1 | 1 | 12 | 183.33 |
| <b>CHRNA7</b> | testis cancer        | 1 | 7  | 3 | 0 | 11 | 181.82 |
| <b>CHRNA7</b> | prostate cancer      | 0 | 9  | 0 | 1 | 10 | 180    |
| <b>CHRNA7</b> | pancreatic cancer    | 1 | 6  | 4 | 0 | 11 | 172.73 |
| <b>CHRNA7</b> | breast cancer        | 0 | 7  | 3 | 0 | 10 | 170    |
| <b>CHNRB1</b> | liver cancer         | 5 | 3  | 1 | 0 | 9  | 244.44 |
| <b>CHNRB1</b> | colorectal cancer    | 4 | 8  | 0 | 0 | 12 | 233.33 |
| <b>CHNRB1</b> | breast cancer        | 4 | 6  | 1 | 0 | 11 | 227.27 |
| <b>CHNRB1</b> | ovarian cancer       | 5 | 5  | 2 | 0 | 12 | 225    |
| <b>CHNRB1</b> | endometrial cancer   | 3 | 7  | 1 | 0 | 11 | 218.18 |
| <b>CHNRB1</b> | prostate cancer      | 3 | 7  | 1 | 0 | 11 | 218.18 |
| <b>CHNRB1</b> | cervical cancer      | 6 | 3  | 2 | 1 | 12 | 216.67 |
| <b>CHNRB1</b> | glioma               | 4 | 4  | 1 | 1 | 10 | 210    |
| <b>CHNRB1</b> | carcinoid            | 0 | 3  | 0 | 0 | 3  | 200    |
| <b>CHNRB1</b> | head and neck cancer | 0 | 4  | 0 | 0 | 4  | 200    |
| <b>CHNRB1</b> | lymphoma             | 4 | 2  | 2 | 1 | 9  | 200    |
| <b>CHNRB1</b> | melanoma             | 2 | 6  | 2 | 0 | 10 | 200    |
| <b>CHNRB1</b> | urothelial cancer    | 2 | 7  | 2 | 0 | 11 | 200    |
| <b>CHNRB1</b> | renal cancer         | 5 | 3  | 1 | 2 | 11 | 200    |
| <b>CHNRB1</b> | testis cancer        | 5 | 4  | 1 | 2 | 12 | 200    |
| <b>CHNRB1</b> | thyroid cancer       | 0 | 3  | 1 | 0 | 4  | 175    |
| <b>CHNRB1</b> | pancreatic cancer    | 0 | 7  | 4 | 0 | 11 | 163.64 |
| <b>CLCNKB</b> | testis cancer        | 0 | 8  | 1 | 0 | 9  | 188.89 |
| <b>CLRN1</b>  | thyroid cancer       | 0 | 4  | 0 | 0 | 4  | 200    |
| <b>CLRN1</b>  | colorectal cancer    | 0 | 11 | 1 | 0 | 12 | 191.67 |
| <b>CLRN1</b>  | prostate cancer      | 0 | 10 | 1 | 0 | 11 | 190.91 |
| <b>CLRN1</b>  | breast cancer        | 0 | 8  | 2 | 0 | 10 | 180    |
| <b>CMKLR1</b> | thyroid cancer       | 0 | 4  | 0 | 0 | 4  | 200    |
| <b>CNR1</b>   | thyroid cancer       | 2 | 1  | 1 | 0 | 4  | 225    |
| <b>CNTN6</b>  | colorectal cancer    | 1 | 7  | 2 | 1 | 11 | 172.73 |

|        |                      |   |    |   |   |    |        |
|--------|----------------------|---|----|---|---|----|--------|
| CNTN6  | ovarian cancer       | 2 | 5  | 4 | 1 | 12 | 166.67 |
| CNTN6  | endometrial cancer   | 0 | 8  | 4 | 0 | 12 | 166.67 |
| CNTN6  | melanoma             | 0 | 7  | 2 | 1 | 10 | 160    |
| CNTN6  | stomach cancer       | 1 | 5  | 2 | 2 | 10 | 150    |
| CNTN6  | thyroid cancer       | 0 | 2  | 2 | 0 | 4  | 150    |
| CRIM1  | colorectal cancer    | 0 | 9  | 2 | 1 | 12 | 166.67 |
| CSF1R  | thyroid cancer       | 0 | 4  | 0 | 0 | 4  | 200    |
| CSF1R  | ovarian cancer       | 1 | 5  | 3 | 0 | 9  | 177.78 |
| CSF1R  | stomach cancer       | 0 | 5  | 5 | 0 | 10 | 150    |
| CSPG5  | testis cancer        | 0 | 8  | 3 | 0 | 11 | 172.73 |
| CXCR5  | prostate cancer      | 0 | 8  | 3 | 1 | 12 | 158.33 |
| DCBLD2 | colorectal cancer    | 0 | 10 | 0 | 0 | 10 | 200    |
| DCBLD2 | head and neck cancer | 0 | 3  | 0 | 0 | 3  | 200    |
| DCBLD2 | melanoma             | 0 | 9  | 0 | 0 | 9  | 200    |
| DCBLD2 | endometrial cancer   | 0 | 9  | 2 | 0 | 11 | 181.82 |
| DCBLD2 | pancreatic cancer    | 0 | 9  | 0 | 1 | 10 | 180    |
| DCBLD2 | liver cancer         | 0 | 10 | 1 | 1 | 12 | 175    |
| DCBLD2 | ovarian cancer       | 0 | 8  | 4 | 0 | 12 | 166.67 |
| DCBLD2 | carcinoid            | 0 | 2  | 2 | 0 | 4  | 150    |
| DCBLD2 | thyroid cancer       | 0 | 2  | 2 | 0 | 4  | 150    |
| DSCAM  | glioma               | 6 | 2  | 1 | 3 | 12 | 191.67 |
| DSCAM  | testis cancer        | 2 | 5  | 1 | 3 | 11 | 154.55 |
| DSCAM  | carcinoid            | 1 | 1  | 1 | 1 | 4  | 150    |
| DUOXA1 | lymphoma             | 1 | 8  | 1 | 1 | 11 | 181.82 |
| DUOXA1 | head and neck cancer | 0 | 3  | 1 | 0 | 4  | 175    |
| EDNRA  | head and neck cancer | 0 | 4  | 0 | 0 | 4  | 200    |
| EDNRA  | skin cancer          | 1 | 9  | 2 | 0 | 12 | 191.67 |
| EDNRA  | pancreatic cancer    | 2 | 6  | 3 | 0 | 11 | 190.91 |
| EDNRA  | cervical cancer      | 0 | 9  | 3 | 0 | 12 | 175    |
| EDNRA  | thyroid cancer       | 0 | 3  | 1 | 0 | 4  | 175    |
| EDNRA  | ovarian cancer       | 0 | 8  | 3 | 0 | 11 | 172.73 |
| EDNRA  | glioma               | 1 | 8  | 1 | 2 | 12 | 166.67 |
| EDNRA  | stomach cancer       | 0 | 6  | 2 | 1 | 9  | 155.56 |
| EDNRA  | breast cancer        | 1 | 5  | 5 | 1 | 12 | 150    |
| EDNRA  | colorectal cancer    | 0 | 6  | 6 | 0 | 12 | 150    |
| EDNRB  | breast cancer        | 1 | 11 | 0 | 0 | 12 | 208.33 |
| EDNRB  | ovarian cancer       | 0 | 8  | 2 | 2 | 12 | 150    |
| EFNA3  | thyroid cancer       | 3 | 0  | 0 | 0 | 3  | 300    |
| EFNA3  | testis cancer        | 8 | 4  | 0 | 0 | 12 | 266.67 |
| EFNA3  | liver cancer         | 6 | 5  | 1 | 0 | 12 | 241.67 |

|       |                      |   |    |   |   |    |        |
|-------|----------------------|---|----|---|---|----|--------|
| EFNA3 | glioma               | 3 | 7  | 0 | 0 | 10 | 230    |
| EFNA3 | endometrial cancer   | 2 | 9  | 0 | 0 | 11 | 218.18 |
| EFNA3 | colorectal cancer    | 2 | 10 | 0 | 0 | 12 | 216.67 |
| EFNA3 | stomach cancer       | 4 | 6  | 2 | 0 | 12 | 216.67 |
| EFNA3 | urothelial cancer    | 2 | 9  | 1 | 0 | 12 | 208.33 |
| EFNA3 | breast cancer        | 1 | 10 | 1 | 0 | 12 | 200    |
| EFNA3 | carcinoid            | 1 | 2  | 1 | 0 | 4  | 200    |
| EFNA3 | head and neck cancer | 0 | 3  | 0 | 0 | 3  | 200    |
| EFNA3 | melanoma             | 0 | 10 | 0 | 0 | 10 | 200    |
| EFNA3 | pancreatic cancer    | 2 | 8  | 2 | 0 | 12 | 200    |
| EFNA3 | renal cancer         | 2 | 7  | 2 | 0 | 11 | 200    |
| EFNA3 | prostate cancer      | 0 | 10 | 2 | 0 | 12 | 183.33 |
| EFNA3 | cervical cancer      | 1 | 6  | 5 | 0 | 12 | 166.67 |
| EFNA3 | skin cancer          | 0 | 8  | 4 | 0 | 12 | 166.67 |
| EFNA3 | ovarian cancer       | 0 | 7  | 4 | 0 | 11 | 163.64 |
| EFNA3 | lymphoma             | 0 | 7  | 5 | 0 | 12 | 158.33 |
| EFNA3 | lung cancer          | 1 | 5  | 5 | 1 | 12 | 150    |
| EFNA4 | colorectal cancer    | 3 | 9  | 0 | 0 | 12 | 225    |
| EFNA4 | endometrial cancer   | 1 | 11 | 0 | 0 | 12 | 208.33 |
| EFNA4 | head and neck cancer | 0 | 3  | 0 | 0 | 3  | 200    |
| EFNA4 | melanoma             | 0 | 11 | 0 | 0 | 11 | 200    |
| EFNA4 | ovarian cancer       | 0 | 11 | 0 | 0 | 11 | 200    |
| EFNA4 | pancreatic cancer    | 1 | 8  | 1 | 0 | 10 | 200    |
| EFNA4 | stomach cancer       | 1 | 9  | 1 | 0 | 11 | 200    |
| EFNA4 | testis cancer        | 0 | 9  | 0 | 0 | 9  | 200    |
| EFNA4 | thyroid cancer       | 0 | 4  | 0 | 0 | 4  | 200    |
| EFNA4 | liver cancer         | 0 | 11 | 1 | 0 | 12 | 191.67 |
| EFNA4 | cervical cancer      | 0 | 11 | 0 | 1 | 12 | 183.33 |
| EFNA4 | lung cancer          | 0 | 8  | 3 | 1 | 12 | 158.33 |
| EFNA4 | carcinoid            | 0 | 2  | 2 | 0 | 4  | 150    |
| EFNA4 | urothelial cancer    | 0 | 7  | 4 | 1 | 12 | 150    |
| ENPP5 | testis cancer        | 3 | 8  | 0 | 0 | 11 | 227.27 |
| ENPP5 | breast cancer        | 1 | 10 | 1 | 0 | 12 | 200    |
| ENPP5 | carcinoid            | 0 | 4  | 0 | 0 | 4  | 200    |
| ENPP5 | prostate cancer      | 0 | 12 | 0 | 0 | 12 | 200    |
| ENPP5 | thyroid cancer       | 0 | 4  | 0 | 0 | 4  | 200    |
| ENPP5 | colorectal cancer    | 0 | 10 | 2 | 0 | 12 | 183.33 |
| ENPP5 | melanoma             | 0 | 9  | 0 | 1 | 10 | 180    |
| ENPP5 | head and neck cancer | 1 | 2  | 0 | 1 | 4  | 175    |
| ENPP5 | renal cancer         | 0 | 9  | 2 | 1 | 12 | 166.67 |

|       |                      |   |    |   |   |    |        |
|-------|----------------------|---|----|---|---|----|--------|
| ENPP5 | endometrial cancer   | 0 | 7  | 5 | 0 | 12 | 158.33 |
| ENPP5 | urothelial cancer    | 0 | 7  | 3 | 1 | 11 | 154.55 |
| EPHA1 | colorectal cancer    | 6 | 6  | 0 | 0 | 12 | 250    |
| EPHA1 | endometrial cancer   | 1 | 11 | 0 | 0 | 12 | 208.33 |
| EPHA1 | carcinoid            | 0 | 4  | 0 | 0 | 4  | 200    |
| EPHA1 | liver cancer         | 0 | 12 | 0 | 0 | 12 | 200    |
| EPHA1 | pancreatic cancer    | 0 | 11 | 0 | 0 | 11 | 200    |
| EPHA1 | prostate cancer      | 0 | 11 | 0 | 0 | 11 | 200    |
| EPHA1 | testis cancer        | 0 | 12 | 0 | 0 | 12 | 200    |
| EPHA1 | thyroid cancer       | 0 | 4  | 0 | 0 | 4  | 200    |
| EPHA1 | urothelial cancer    | 0 | 11 | 1 | 0 | 12 | 191.67 |
| EPHA1 | breast cancer        | 1 | 8  | 3 | 0 | 12 | 183.33 |
| EPHA1 | ovarian cancer       | 1 | 8  | 3 | 0 | 12 | 183.33 |
| EPHA1 | stomach cancer       | 0 | 9  | 2 | 0 | 11 | 181.82 |
| EPHA1 | melanoma             | 0 | 9  | 3 | 0 | 12 | 175    |
| EPHA1 | renal cancer         | 0 | 8  | 3 | 0 | 11 | 172.73 |
| EPHA1 | head and neck cancer | 0 | 2  | 1 | 0 | 3  | 166.67 |
| EPHA1 | skin cancer          | 0 | 7  | 5 | 0 | 12 | 158.33 |
| EPHA1 | cervical cancer      | 0 | 9  | 1 | 2 | 12 | 158.33 |
| EPHA3 | testis cancer        | 0 | 6  | 5 | 0 | 11 | 154.55 |
| EPHA4 | thyroid cancer       | 4 | 0  | 0 | 0 | 4  | 300    |
| ERBB2 | breast cancer        | 4 | 2  | 1 | 4 | 11 | 154.55 |
| ERBB4 | testis cancer        | 0 | 9  | 2 | 0 | 11 | 181.82 |
| ERMP1 | thyroid cancer       | 2 | 1  | 0 | 0 | 3  | 266.67 |
| ERMP1 | urothelial cancer    | 3 | 2  | 2 | 3 | 10 | 150    |
| ESAM  | colorectal cancer    | 1 | 10 | 0 | 0 | 11 | 209.09 |
| ESAM  | stomach cancer       | 1 | 10 | 0 | 0 | 11 | 209.09 |
| ESAM  | carcinoid            | 0 | 4  | 0 | 0 | 4  | 200    |
| ESAM  | endometrial cancer   | 0 | 12 | 0 | 0 | 12 | 200    |
| ESAM  | head and neck cancer | 0 | 4  | 0 | 0 | 4  | 200    |
| ESAM  | liver cancer         | 0 | 12 | 0 | 0 | 12 | 200    |
| ESAM  | lung cancer          | 0 | 12 | 0 | 0 | 12 | 200    |
| ESAM  | melanoma             | 0 | 11 | 0 | 0 | 11 | 200    |
| ESAM  | prostate cancer      | 1 | 9  | 1 | 0 | 11 | 200    |
| ESAM  | testis cancer        | 0 | 11 | 0 | 0 | 11 | 200    |
| ESAM  | thyroid cancer       | 1 | 2  | 1 | 0 | 4  | 200    |
| ESAM  | breast cancer        | 3 | 6  | 2 | 1 | 12 | 191.67 |
| ESAM  | ovarian cancer       | 0 | 11 | 1 | 0 | 12 | 191.67 |
| ESAM  | pancreatic cancer    | 0 | 10 | 2 | 0 | 12 | 183.33 |
| ESAM  | urothelial cancer    | 0 | 11 | 0 | 1 | 12 | 183.33 |

|                 |                      |    |    |   |   |    |        |
|-----------------|----------------------|----|----|---|---|----|--------|
| <b>ESAM</b>     | renal cancer         | 1  | 7  | 3 | 0 | 11 | 181.82 |
| <b>ESAM</b>     | lymphoma             | 0  | 10 | 1 | 1 | 12 | 175    |
| <b>FAM171A1</b> | prostate cancer      | 0  | 10 | 2 | 0 | 12 | 183.33 |
| <b>FAM171A1</b> | thyroid cancer       | 0  | 3  | 1 | 0 | 4  | 175    |
| <b>FAM171A1</b> | breast cancer        | 0  | 7  | 5 | 0 | 12 | 158.33 |
| <b>FAM171B</b>  | urothelial cancer    | 1  | 7  | 4 | 0 | 12 | 175    |
| <b>FAM171B</b>  | melanoma             | 2  | 6  | 2 | 2 | 12 | 166.67 |
| <b>FAM171B</b>  | endometrial cancer   | 0  | 6  | 4 | 0 | 10 | 160    |
| <b>FAM171B</b>  | colorectal cancer    | 0  | 6  | 5 | 0 | 11 | 154.55 |
| <b>FCAR</b>     | thyroid cancer       | 0  | 3  | 1 | 0 | 4  | 175    |
| <b>FFAR3</b>    | pancreatic cancer    | 10 | 2  | 0 | 0 | 12 | 283.33 |
| <b>FFAR3</b>    | colorectal cancer    | 9  | 2  | 0 | 0 | 11 | 281.82 |
| <b>FFAR3</b>    | renal cancer         | 8  | 4  | 0 | 0 | 12 | 266.67 |
| <b>FFAR3</b>    | stomach cancer       | 6  | 3  | 0 | 0 | 9  | 266.67 |
| <b>FFAR3</b>    | ovarian cancer       | 5  | 3  | 3 | 1 | 12 | 200    |
| <b>FFAR3</b>    | endometrial cancer   | 3  | 6  | 2 | 1 | 12 | 191.67 |
| <b>FFAR3</b>    | melanoma             | 0  | 9  | 1 | 0 | 10 | 190    |
| <b>FFAR3</b>    | breast cancer        | 1  | 8  | 2 | 1 | 12 | 175    |
| <b>FFAR3</b>    | lung cancer          | 2  | 5  | 3 | 1 | 11 | 172.73 |
| <b>FFAR3</b>    | cervical cancer      | 1  | 7  | 2 | 2 | 12 | 158.33 |
| <b>FFAR3</b>    | lymphoma             | 0  | 7  | 3 | 1 | 11 | 154.55 |
| <b>FFAR3</b>    | carcinoid            | 0  | 3  | 0 | 1 | 4  | 150    |
| <b>FFAR3</b>    | head and neck cancer | 0  | 3  | 0 | 1 | 4  | 150    |
| <b>FFAR3</b>    | thyroid cancer       | 0  | 2  | 2 | 0 | 4  | 150    |
| <b>FFAR3</b>    | urothelial cancer    | 1  | 5  | 2 | 2 | 10 | 150    |
| <b>FGFR4</b>    | colorectal cancer    | 0  | 8  | 2 | 1 | 11 | 163.64 |
| <b>FGFRL1</b>   | testis cancer        | 0  | 12 | 0 | 0 | 12 | 200    |
| <b>FGFRL1</b>   | colorectal cancer    | 0  | 7  | 3 | 1 | 11 | 154.55 |
| <b>FGFRL1</b>   | carcinoid            | 0  | 2  | 2 | 0 | 4  | 150    |
| <b>FGFRL1</b>   | thyroid cancer       | 0  | 2  | 2 | 0 | 4  | 150    |
| <b>FLRT1</b>    | thyroid cancer       | 1  | 3  | 0 | 0 | 4  | 225    |
| <b>FLRT1</b>    | testis cancer        | 0  | 8  | 0 | 0 | 8  | 200    |
| <b>FLRT1</b>    | liver cancer         | 0  | 11 | 1 | 0 | 12 | 191.67 |
| <b>FLRT1</b>    | ovarian cancer       | 0  | 8  | 3 | 0 | 11 | 172.73 |
| <b>FLRT1</b>    | pancreatic cancer    | 0  | 7  | 0 | 2 | 9  | 155.56 |
| <b>FLRT1</b>    | melanoma             | 0  | 7  | 3 | 1 | 11 | 154.55 |
| <b>FLRT1</b>    | head and neck cancer | 0  | 3  | 0 | 1 | 4  | 150    |
| <b>FLT1</b>     | head and neck cancer | 0  | 2  | 2 | 0 | 4  | 150    |
| <b>FOLH1</b>    | prostate cancer      | 7  | 0  | 0 | 0 | 7  | 300    |
| <b>FRRS1</b>    | colorectal cancer    | 4  | 7  | 0 | 0 | 11 | 236.36 |



|               |                      |   |    |   |   |    |        |
|---------------|----------------------|---|----|---|---|----|--------|
| <b>FRRS1</b>  | stomach cancer       | 4 | 6  | 1 | 0 | 11 | 227.27 |
| <b>FRRS1</b>  | liver cancer         | 2 | 10 | 0 | 0 | 12 | 216.67 |
| <b>FRRS1</b>  | pancreatic cancer    | 3 | 7  | 0 | 1 | 11 | 209.09 |
| <b>FRRS1</b>  | melanoma             | 3 | 6  | 1 | 1 | 11 | 200    |
| <b>FRRS1</b>  | glioma               | 0 | 9  | 1 | 1 | 11 | 172.73 |
| <b>FRRS1</b>  | thyroid cancer       | 0 | 2  | 1 | 0 | 3  | 166.67 |
| <b>FRRS1</b>  | endometrial cancer   | 2 | 4  | 5 | 1 | 12 | 158.33 |
| <b>FRRS1</b>  | breast cancer        | 0 | 6  | 5 | 0 | 11 | 154.55 |
| <b>GABBR1</b> | thyroid cancer       | 0 | 3  | 1 | 0 | 4  | 175    |
| <b>GABBR1</b> | carcinoid            | 0 | 2  | 2 | 0 | 4  | 150    |
| <b>GABRB1</b> | stomach cancer       | 4 | 6  | 0 | 0 | 10 | 240    |
| <b>GABRB1</b> | breast cancer        | 4 | 6  | 2 | 0 | 12 | 216.67 |
| <b>GABRB1</b> | ovarian cancer       | 3 | 8  | 1 | 0 | 12 | 216.67 |
| <b>GABRB1</b> | head and neck cancer | 0 | 2  | 0 | 0 | 2  | 200    |
| <b>GABRB1</b> | pancreatic cancer    | 3 | 4  | 1 | 1 | 9  | 200    |
| <b>GABRB1</b> | renal cancer         | 2 | 9  | 0 | 1 | 12 | 200    |
| <b>GABRB1</b> | colorectal cancer    | 0 | 10 | 2 | 0 | 12 | 183.33 |
| <b>GABRB1</b> | lung cancer          | 0 | 8  | 2 | 0 | 10 | 180    |
| <b>GABRB1</b> | urothelial cancer    | 1 | 6  | 4 | 0 | 11 | 172.73 |
| <b>GABRB1</b> | cervical cancer      | 0 | 7  | 4 | 0 | 11 | 163.64 |
| <b>GABRB1</b> | endometrial cancer   | 0 | 6  | 4 | 0 | 10 | 160    |
| <b>GALR2</b>  | colorectal cancer    | 2 | 10 | 0 | 0 | 12 | 216.67 |
| <b>GALR2</b>  | carcinoid            | 0 | 4  | 0 | 0 | 4  | 200    |
| <b>GALR2</b>  | testis cancer        | 0 | 10 | 0 | 0 | 10 | 200    |
| <b>GALR2</b>  | thyroid cancer       | 0 | 4  | 0 | 0 | 4  | 200    |
| <b>GALR2</b>  | breast cancer        | 0 | 11 | 1 | 0 | 12 | 191.67 |
| <b>GALR2</b>  | ovarian cancer       | 0 | 9  | 2 | 0 | 11 | 181.82 |
| <b>GALR2</b>  | prostate cancer      | 0 | 8  | 2 | 1 | 11 | 163.64 |
| <b>GALR2</b>  | pancreatic cancer    | 1 | 5  | 3 | 1 | 10 | 160    |
| <b>GIPR</b>   | thyroid cancer       | 1 | 2  | 0 | 0 | 3  | 233.33 |
| <b>GIPR</b>   | prostate cancer      | 0 | 8  | 3 | 0 | 11 | 172.73 |
| <b>GIPR</b>   | breast cancer        | 0 | 8  | 3 | 1 | 12 | 158.33 |
| <b>GIPR</b>   | carcinoid            | 0 | 3  | 0 | 1 | 4  | 150    |
| <b>GLRA4</b>  | colorectal cancer    | 3 | 8  | 1 | 0 | 12 | 216.67 |
| <b>GLRA4</b>  | prostate cancer      | 0 | 10 | 1 | 0 | 11 | 190.91 |
| <b>GLRA4</b>  | pancreatic cancer    | 2 | 5  | 2 | 2 | 11 | 163.64 |
| <b>GLRB</b>   | glioma               | 6 | 3  | 1 | 0 | 10 | 250    |
| <b>GP6</b>    | glioma               | 0 | 9  | 2 | 0 | 11 | 181.82 |
| <b>GPBAR1</b> | thyroid cancer       | 0 | 3  | 1 | 0 | 4  | 175    |
| <b>GPC1</b>   | thyroid cancer       | 0 | 3  | 0 | 1 | 4  | 150    |

|                |                      |   |    |   |   |    |        |
|----------------|----------------------|---|----|---|---|----|--------|
| <b>GPM6B</b>   | endometrial cancer   | 6 | 1  | 1 | 4 | 12 | 175    |
| <b>GPR143</b>  | melanoma             | 8 | 0  | 1 | 3 | 12 | 208.33 |
| <b>GPR143</b>  | breast cancer        | 0 | 6  | 6 | 0 | 12 | 150    |
| <b>GPR153</b>  | glioma               | 4 | 2  | 6 | 0 | 12 | 183.33 |
| <b>GPR34</b>   | thyroid cancer       | 0 | 3  | 1 | 0 | 4  | 175    |
| <b>GPR34</b>   | melanoma             | 0 | 7  | 4 | 1 | 12 | 150    |
| <b>GPR4</b>    | colorectal cancer    | 6 | 2  | 1 | 1 | 10 | 230    |
| <b>GPR4</b>    | breast cancer        | 0 | 9  | 1 | 1 | 11 | 172.73 |
| <b>GPR4</b>    | ovarian cancer       | 0 | 8  | 2 | 2 | 12 | 150    |
| <b>GPR4</b>    | thyroid cancer       | 0 | 2  | 2 | 0 | 4  | 150    |
| <b>GPR65</b>   | prostate cancer      | 6 | 3  | 3 | 0 | 12 | 225    |
| <b>GPR65</b>   | pancreatic cancer    | 2 | 5  | 2 | 2 | 11 | 163.64 |
| <b>GPR65</b>   | colorectal cancer    | 1 | 6  | 3 | 2 | 12 | 150    |
| <b>GPR82</b>   | colorectal cancer    | 1 | 6  | 2 | 1 | 10 | 170    |
| <b>GPRC5D</b>  | lymphoma             | 8 | 2  | 0 | 2 | 12 | 233.33 |
| <b>GPRC5D</b>  | breast cancer        | 2 | 6  | 3 | 1 | 12 | 175    |
| <b>GPRC5D</b>  | carcinoid            | 0 | 3  | 1 | 0 | 4  | 175    |
| <b>GPRC5D</b>  | stomach cancer       | 0 | 7  | 4 | 0 | 11 | 163.64 |
| <b>GPRC5D</b>  | colorectal cancer    | 0 | 7  | 5 | 0 | 12 | 158.33 |
| <b>GPRC5D</b>  | liver cancer         | 0 | 7  | 3 | 1 | 11 | 154.55 |
| <b>GRAMD1B</b> | head and neck cancer | 1 | 1  | 1 | 1 | 4  | 150    |
| <b>GRAMD1B</b> | stomach cancer       | 0 | 6  | 6 | 0 | 12 | 150    |
| <b>GRIN1</b>   | colorectal cancer    | 2 | 7  | 2 | 1 | 12 | 183.33 |
| <b>GRM2</b>    | head and neck cancer | 0 | 3  | 1 | 0 | 4  | 175    |
| <b>GRM2</b>    | glioma               | 3 | 3  | 4 | 2 | 12 | 158.33 |
| <b>GRM6</b>    | glioma               | 3 | 5  | 4 | 0 | 12 | 191.67 |
| <b>GSG1L</b>   | head and neck cancer | 1 | 1  | 1 | 1 | 4  | 150    |
| <b>GSG1L</b>   | testis cancer        | 4 | 2  | 2 | 4 | 12 | 150    |
| <b>GYPC</b>    | melanoma             | 0 | 12 | 0 | 0 | 12 | 200    |
| <b>GYPC</b>    | colorectal cancer    | 0 | 9  | 2 | 0 | 11 | 181.82 |
| <b>GYPC</b>    | testis cancer        | 1 | 7  | 2 | 1 | 11 | 172.73 |
| <b>GYPC</b>    | stomach cancer       | 0 | 7  | 4 | 0 | 11 | 163.64 |
| <b>GYPC</b>    | thyroid cancer       | 0 | 2  | 2 | 0 | 4  | 150    |
| <b>HAVCR1</b>  | breast cancer        | 2 | 8  | 2 | 0 | 12 | 200    |
| <b>HAVCR1</b>  | colorectal cancer    | 0 | 10 | 2 | 0 | 12 | 183.33 |
| <b>HAVCR1</b>  | carcinoid            | 0 | 3  | 1 | 0 | 4  | 175    |
| <b>HAVCR1</b>  | thyroid cancer       | 0 | 3  | 1 | 0 | 4  | 175    |
| <b>HAVCR1</b>  | prostate cancer      | 0 | 9  | 2 | 1 | 12 | 166.67 |
| <b>HAVCR1</b>  | ovarian cancer       | 0 | 7  | 5 | 0 | 12 | 158.33 |
| <b>HAVCR1</b>  | pancreatic cancer    | 0 | 7  | 5 | 0 | 12 | 158.33 |

|                |                      |   |    |   |   |    |        |
|----------------|----------------------|---|----|---|---|----|--------|
| <b>HAVCR1</b>  | renal cancer         | 1 | 5  | 6 | 0 | 12 | 158.33 |
| <b>HAVCR1</b>  | stomach cancer       | 1 | 5  | 6 | 0 | 12 | 158.33 |
| <b>HAVCR1</b>  | head and neck cancer | 0 | 2  | 2 | 0 | 4  | 150    |
| <b>HCRTR1</b>  | carcinoid            | 0 | 3  | 0 | 1 | 4  | 150    |
| <b>HEG1</b>    | thyroid cancer       | 2 | 2  | 0 | 0 | 4  | 250    |
| <b>HEG1</b>    | liver cancer         | 4 | 7  | 1 | 0 | 12 | 225    |
| <b>HEG1</b>    | endometrial cancer   | 3 | 8  | 1 | 0 | 12 | 216.67 |
| <b>HEG1</b>    | pancreatic cancer    | 2 | 4  | 4 | 1 | 11 | 163.64 |
| <b>HEG1</b>    | testis cancer        | 1 | 7  | 1 | 2 | 11 | 163.64 |
| <b>HEPACAM</b> | glioma               | 2 | 6  | 1 | 3 | 12 | 158.33 |
| <b>HEPH</b>    | liver cancer         | 2 | 6  | 1 | 0 | 9  | 211.11 |
| <b>HEPH</b>    | pancreatic cancer    | 2 | 7  | 1 | 0 | 10 | 210    |
| <b>HEPH</b>    | colorectal cancer    | 2 | 9  | 1 | 0 | 12 | 208.33 |
| <b>HEPH</b>    | endometrial cancer   | 1 | 9  | 1 | 0 | 11 | 200    |
| <b>HEPH</b>    | thyroid cancer       | 0 | 4  | 0 | 0 | 4  | 200    |
| <b>HEPH</b>    | breast cancer        | 0 | 10 | 2 | 0 | 12 | 183.33 |
| <b>HEPH</b>    | ovarian cancer       | 0 | 10 | 2 | 0 | 12 | 183.33 |
| <b>HEPH</b>    | renal cancer         | 0 | 10 | 2 | 0 | 12 | 183.33 |
| <b>HEPH</b>    | testis cancer        | 0 | 9  | 2 | 0 | 11 | 181.82 |
| <b>HEPH</b>    | head and neck cancer | 0 | 3  | 1 | 0 | 4  | 175    |
| <b>HEPH</b>    | stomach cancer       | 0 | 9  | 3 | 0 | 12 | 175    |
| <b>HEPH</b>    | urothelial cancer    | 0 | 7  | 4 | 0 | 11 | 163.64 |
| <b>HEPH</b>    | lung cancer          | 0 | 6  | 4 | 0 | 10 | 160    |
| <b>HEPH</b>    | prostate cancer      | 0 | 7  | 5 | 0 | 12 | 158.33 |
| <b>HEPH</b>    | cervical cancer      | 0 | 8  | 3 | 1 | 12 | 158.33 |
| <b>HEPH</b>    | lymphoma             | 0 | 7  | 4 | 1 | 12 | 150    |
| <b>HLA-DMB</b> | lymphoma             | 1 | 8  | 1 | 2 | 12 | 166.67 |
| <b>HLA-DOB</b> | lymphoma             | 9 | 2  | 0 | 1 | 12 | 258.33 |
| <b>HRH1</b>    | liver cancer         | 6 | 0  | 2 | 3 | 11 | 181.82 |
| <b>HRH1</b>    | colorectal cancer    | 0 | 6  | 6 | 0 | 12 | 150    |
| <b>HTR2B</b>   | breast cancer        | 8 | 3  | 0 | 1 | 12 | 250    |
| <b>HTR2B</b>   | pancreatic cancer    | 4 | 3  | 1 | 2 | 10 | 190    |
| <b>HTR2B</b>   | urothelial cancer    | 1 | 8  | 1 | 2 | 12 | 166.67 |
| <b>HTR2B</b>   | colorectal cancer    | 3 | 4  | 1 | 3 | 11 | 163.64 |
| <b>HTR2B</b>   | stomach cancer       | 4 | 2  | 1 | 4 | 11 | 154.55 |
| <b>HTR3B</b>   | testis cancer        | 2 | 6  | 1 | 0 | 9  | 211.11 |
| <b>HTR3B</b>   | melanoma             | 3 | 7  | 0 | 1 | 11 | 209.09 |
| <b>HTR3B</b>   | colorectal cancer    | 5 | 2  | 4 | 1 | 12 | 191.67 |
| <b>HTR3B</b>   | pancreatic cancer    | 2 | 8  | 0 | 2 | 12 | 183.33 |
| <b>HTR3B</b>   | stomach cancer       | 1 | 7  | 4 | 0 | 12 | 175    |

|               |                      |   |    |   |   |    |        |
|---------------|----------------------|---|----|---|---|----|--------|
| <b>HTR3B</b>  | lung cancer          | 2 | 6  | 1 | 2 | 11 | 172.73 |
| <b>HTR3B</b>  | ovarian cancer       | 0 | 8  | 1 | 2 | 11 | 154.55 |
| <b>HTR4</b>   | prostate cancer      | 8 | 3  | 0 | 1 | 12 | 250    |
| <b>HTR4</b>   | thyroid cancer       | 1 | 2  | 0 | 1 | 4  | 175    |
| <b>HTR4</b>   | endometrial cancer   | 4 | 3  | 1 | 4 | 12 | 158.33 |
| <b>HTR5A</b>  | colorectal cancer    | 0 | 12 | 0 | 0 | 12 | 200    |
| <b>HTR5A</b>  | breast cancer        | 1 | 6  | 5 | 0 | 12 | 166.67 |
| <b>HTR5A</b>  | cervical cancer      | 0 | 9  | 1 | 2 | 12 | 158.33 |
| <b>HTR5A</b>  | thyroid cancer       | 0 | 3  | 0 | 1 | 4  | 150    |
| <b>HTR6</b>   | carcinoid            | 0 | 3  | 1 | 0 | 4  | 175    |
| <b>HTR6</b>   | thyroid cancer       | 0 | 3  | 1 | 0 | 4  | 175    |
| <b>HTR7</b>   | thyroid cancer       | 0 | 3  | 0 | 1 | 4  | 150    |
| <b>ICOS</b>   | testis cancer        | 0 | 8  | 4 | 0 | 12 | 166.67 |
| <b>ICOS</b>   | melanoma             | 0 | 8  | 1 | 2 | 11 | 154.55 |
| <b>ICOS</b>   | thyroid cancer       | 0 | 3  | 0 | 1 | 4  | 150    |
| <b>IFNAR1</b> | thyroid cancer       | 0 | 3  | 0 | 0 | 3  | 200    |
| <b>IFNAR1</b> | pancreatic cancer    | 0 | 10 | 0 | 2 | 12 | 166.67 |
| <b>IGF2R</b>  | thyroid cancer       | 2 | 1  | 0 | 0 | 3  | 266.67 |
| <b>IGF2R</b>  | prostate cancer      | 6 | 5  | 0 | 0 | 11 | 254.55 |
| <b>IGF2R</b>  | endometrial cancer   | 2 | 8  | 1 | 0 | 11 | 209.09 |
| <b>IGF2R</b>  | carcinoid            | 0 | 4  | 0 | 0 | 4  | 200    |
| <b>IGF2R</b>  | head and neck cancer | 0 | 4  | 0 | 0 | 4  | 200    |
| <b>IGF2R</b>  | melanoma             | 3 | 6  | 1 | 1 | 11 | 200    |
| <b>IGF2R</b>  | colorectal cancer    | 1 | 10 | 0 | 1 | 12 | 191.67 |
| <b>IGF2R</b>  | liver cancer         | 2 | 6  | 3 | 0 | 11 | 190.91 |
| <b>IGF2R</b>  | testis cancer        | 1 | 8  | 2 | 0 | 11 | 190.91 |
| <b>IGF2R</b>  | stomach cancer       | 0 | 8  | 0 | 2 | 10 | 160    |
| <b>IGF2R</b>  | glioma               | 1 | 7  | 2 | 2 | 12 | 158.33 |
| <b>IGF2R</b>  | breast cancer        | 0 | 6  | 6 | 0 | 12 | 150    |
| <b>IL10RB</b> | glioma               | 3 | 3  | 4 | 2 | 12 | 158.33 |
| <b>IL1R1</b>  | endometrial cancer   | 1 | 8  | 2 | 0 | 11 | 190.91 |
| <b>IL1R1</b>  | colorectal cancer    | 2 | 7  | 2 | 1 | 12 | 183.33 |
| <b>IL1R1</b>  | testis cancer        | 2 | 7  | 2 | 1 | 12 | 183.33 |
| <b>IL1R1</b>  | carcinoid            | 0 | 2  | 2 | 0 | 4  | 150    |
| <b>IL1R2</b>  | liver cancer         | 5 | 7  | 0 | 0 | 12 | 241.67 |
| <b>IL1R2</b>  | testis cancer        | 1 | 11 | 0 | 0 | 12 | 208.33 |
| <b>IL1R2</b>  | breast cancer        | 0 | 11 | 0 | 0 | 11 | 200    |
| <b>IL1R2</b>  | carcinoid            | 0 | 4  | 0 | 0 | 4  | 200    |
| <b>IL1R2</b>  | colorectal cancer    | 0 | 12 | 0 | 0 | 12 | 200    |
| <b>IL1R2</b>  | head and neck cancer | 0 | 4  | 0 | 0 | 4  | 200    |

|        |                      |   |    |   |   |    |        |
|--------|----------------------|---|----|---|---|----|--------|
| IL1R2  | thyroid cancer       | 0 | 4  | 0 | 0 | 4  | 200    |
| IL1R2  | urothelial cancer    | 1 | 9  | 2 | 0 | 12 | 191.67 |
| IL1R2  | endometrial cancer   | 0 | 11 | 1 | 0 | 12 | 191.67 |
| IL1R2  | cervical cancer      | 0 | 11 | 0 | 1 | 12 | 183.33 |
| IL1R2  | pancreatic cancer    | 1 | 9  | 1 | 1 | 12 | 183.33 |
| IL1R2  | prostate cancer      | 0 | 11 | 0 | 1 | 12 | 183.33 |
| IL1R2  | glioma               | 0 | 9  | 3 | 0 | 12 | 175    |
| IL1R2  | renal cancer         | 0 | 9  | 2 | 1 | 12 | 166.67 |
| IL20RA | prostate cancer      | 8 | 4  | 0 | 0 | 12 | 266.67 |
| IL20RA | breast cancer        | 7 | 4  | 1 | 0 | 12 | 250    |
| IL20RA | liver cancer         | 7 | 3  | 2 | 0 | 12 | 241.67 |
| IL20RA | renal cancer         | 2 | 9  | 1 | 0 | 12 | 208.33 |
| IL20RA | endometrial cancer   | 4 | 5  | 0 | 3 | 12 | 183.33 |
| IL20RA | ovarian cancer       | 4 | 2  | 4 | 1 | 11 | 181.82 |
| IL20RA | urothelial cancer    | 2 | 5  | 2 | 2 | 11 | 163.64 |
| IL20RA | pancreatic cancer    | 3 | 3  | 3 | 2 | 11 | 163.64 |
| IL3RA  | glioma               | 2 | 8  | 1 | 0 | 11 | 209.09 |
| IL3RA  | colorectal cancer    | 0 | 11 | 0 | 0 | 11 | 200    |
| IL3RA  | head and neck cancer | 0 | 4  | 0 | 0 | 4  | 200    |
| IL3RA  | ovarian cancer       | 0 | 11 | 0 | 0 | 11 | 200    |
| IL3RA  | pancreatic cancer    | 0 | 12 | 0 | 0 | 12 | 200    |
| IL3RA  | urothelial cancer    | 0 | 11 | 0 | 0 | 11 | 200    |
| IL3RA  | breast cancer        | 0 | 11 | 1 | 0 | 12 | 191.67 |
| IL3RA  | prostate cancer      | 0 | 11 | 1 | 0 | 12 | 191.67 |
| IL3RA  | testis cancer        | 0 | 11 | 1 | 0 | 12 | 191.67 |
| IL3RA  | lung cancer          | 0 | 10 | 2 | 0 | 12 | 183.33 |
| IL3RA  | carcinoid            | 0 | 3  | 1 | 0 | 4  | 175    |
| IL3RA  | endometrial cancer   | 0 | 9  | 3 | 0 | 12 | 175    |
| IL3RA  | liver cancer         | 0 | 8  | 4 | 0 | 12 | 166.67 |
| IL3RA  | melanoma             | 0 | 8  | 4 | 0 | 12 | 166.67 |
| IL3RA  | stomach cancer       | 0 | 8  | 2 | 1 | 11 | 163.64 |
| IL3RA  | cervical cancer      | 0 | 7  | 5 | 0 | 12 | 158.33 |
| IL3RA  | renal cancer         | 0 | 6  | 5 | 0 | 11 | 154.55 |
| IL3RA  | thyroid cancer       | 0 | 2  | 2 | 0 | 4  | 150    |
| ILDR1  | thyroid cancer       | 1 | 3  | 0 | 0 | 4  | 225    |
| ILDR1  | liver cancer         | 4 | 7  | 0 | 1 | 12 | 216.67 |
| ILDR1  | prostate cancer      | 1 | 3  | 2 | 0 | 6  | 183.33 |
| INSR   | carcinoid            | 0 | 3  | 1 | 0 | 4  | 175    |
| INSR   | thyroid cancer       | 0 | 3  | 1 | 0 | 4  | 175    |
| INSR   | colorectal cancer    | 0 | 8  | 3 | 0 | 11 | 172.73 |

|              |                      |   |    |   |   |    |        |
|--------------|----------------------|---|----|---|---|----|--------|
| <b>INSR</b>  | breast cancer        | 0 | 6  | 4 | 0 | 10 | 160    |
| <b>INSR</b>  | liver cancer         | 0 | 8  | 3 | 1 | 12 | 158.33 |
| <b>ITGA3</b> | thyroid cancer       | 3 | 1  | 0 | 0 | 4  | 275    |
| <b>ITGA3</b> | urothelial cancer    | 9 | 2  | 0 | 1 | 12 | 258.33 |
| <b>ITGA3</b> | pancreatic cancer    | 7 | 3  | 0 | 1 | 11 | 245.45 |
| <b>ITGA3</b> | ovarian cancer       | 6 | 3  | 1 | 1 | 11 | 227.27 |
| <b>ITGA3</b> | skin cancer          | 3 | 9  | 0 | 0 | 12 | 225    |
| <b>ITGA3</b> | renal cancer         | 2 | 9  | 1 | 0 | 12 | 208.33 |
| <b>ITGA3</b> | lung cancer          | 4 | 6  | 0 | 2 | 12 | 200    |
| <b>ITGA3</b> | endometrial cancer   | 5 | 3  | 1 | 2 | 11 | 200    |
| <b>ITGA3</b> | stomach cancer       | 3 | 5  | 4 | 0 | 12 | 191.67 |
| <b>ITGA3</b> | head and neck cancer | 1 | 2  | 0 | 1 | 4  | 175    |
| <b>ITGA3</b> | cervical cancer      | 4 | 4  | 1 | 3 | 12 | 175    |
| <b>ITGA6</b> | colorectal cancer    | 1 | 7  | 1 | 1 | 10 | 180    |
| <b>ITGB5</b> | prostate cancer      | 2 | 5  | 0 | 0 | 7  | 228.57 |
| <b>ITGB5</b> | head and neck cancer | 1 | 2  | 1 | 0 | 4  | 200    |
| <b>ITGB5</b> | endometrial cancer   | 1 | 9  | 0 | 1 | 11 | 190.91 |
| <b>ITGB5</b> | glioma               | 3 | 4  | 4 | 0 | 11 | 190.91 |
| <b>ITGB5</b> | thyroid cancer       | 1 | 1  | 2 | 0 | 4  | 175    |
| <b>ITGB5</b> | liver cancer         | 2 | 4  | 3 | 1 | 10 | 170    |
| <b>ITGB5</b> | breast cancer        | 0 | 9  | 2 | 1 | 12 | 166.67 |
| <b>ITGB5</b> | melanoma             | 0 | 7  | 4 | 0 | 11 | 163.64 |
| <b>ITGB5</b> | urothelial cancer    | 1 | 5  | 5 | 0 | 11 | 163.64 |
| <b>ITGB5</b> | testis cancer        | 0 | 7  | 5 | 0 | 12 | 158.33 |
| <b>ITGB5</b> | ovarian cancer       | 2 | 6  | 1 | 3 | 12 | 158.33 |
| <b>ITGB6</b> | cervical cancer      | 2 | 7  | 3 | 0 | 12 | 191.67 |
| <b>ITGB6</b> | urothelial cancer    | 4 | 3  | 1 | 4 | 12 | 158.33 |
| <b>JAG1</b>  | carcinoid            | 1 | 2  | 1 | 0 | 4  | 200    |
| <b>JAG1</b>  | stomach cancer       | 0 | 11 | 0 | 0 | 11 | 200    |
| <b>JAG1</b>  | thyroid cancer       | 0 | 4  | 0 | 0 | 4  | 200    |
| <b>JAG1</b>  | cervical cancer      | 0 | 10 | 2 | 0 | 12 | 183.33 |
| <b>JAG1</b>  | pancreatic cancer    | 0 | 10 | 2 | 0 | 12 | 183.33 |
| <b>JAG1</b>  | glioma               | 4 | 2  | 6 | 0 | 12 | 183.33 |
| <b>JAG1</b>  | liver cancer         | 0 | 9  | 2 | 0 | 11 | 181.82 |
| <b>JAG1</b>  | skin cancer          | 0 | 9  | 2 | 0 | 11 | 181.82 |
| <b>JAG1</b>  | colorectal cancer    | 0 | 10 | 1 | 1 | 12 | 175    |
| <b>JAG1</b>  | urothelial cancer    | 0 | 8  | 4 | 0 | 12 | 166.67 |
| <b>JAG1</b>  | endometrial cancer   | 0 | 5  | 5 | 0 | 10 | 150    |
| <b>JAG1</b>  | head and neck cancer | 0 | 2  | 2 | 0 | 4  | 150    |
| <b>JAM3</b>  | glioma               | 9 | 2  | 0 | 0 | 11 | 281.82 |

|         |                      |   |    |   |   |    |        |
|---------|----------------------|---|----|---|---|----|--------|
| JAM3    | testis cancer        | 1 | 7  | 3 | 1 | 12 | 166.67 |
| JAM3    | carcinoid            | 0 | 2  | 1 | 0 | 3  | 166.67 |
| KCNMB2  | breast cancer        | 0 | 6  | 6 | 0 | 12 | 150    |
| KCNMB2  | prostate cancer      | 0 | 8  | 2 | 2 | 12 | 150    |
| KCNMB2  | thyroid cancer       | 0 | 2  | 2 | 0 | 4  | 150    |
| KISS1R  | thyroid cancer       | 2 | 1  | 0 | 0 | 3  | 266.67 |
| KISS1R  | endometrial cancer   | 5 | 7  | 0 | 0 | 12 | 241.67 |
| KISS1R  | melanoma             | 5 | 6  | 1 | 0 | 12 | 233.33 |
| KISS1R  | renal cancer         | 7 | 3  | 1 | 1 | 12 | 233.33 |
| KISS1R  | liver cancer         | 7 | 2  | 0 | 2 | 11 | 227.27 |
| KISS1R  | urothelial cancer    | 5 | 4  | 3 | 0 | 12 | 216.67 |
| KISS1R  | testis cancer        | 2 | 8  | 0 | 1 | 11 | 200    |
| KISS1R  | colorectal cancer    | 2 | 7  | 3 | 0 | 12 | 191.67 |
| KISS1R  | pancreatic cancer    | 2 | 7  | 0 | 2 | 11 | 181.82 |
| KISS1R  | stomach cancer       | 2 | 6  | 1 | 2 | 11 | 172.73 |
| KISS1R  | breast cancer        | 2 | 4  | 3 | 1 | 10 | 170    |
| KISS1R  | carcinoid            | 0 | 2  | 2 | 0 | 4  | 150    |
| KISS1R  | head and neck cancer | 0 | 3  | 0 | 1 | 4  | 150    |
| KITLG   | prostate cancer      | 0 | 7  | 4 | 1 | 12 | 150    |
| LDLRAD3 | thyroid cancer       | 0 | 3  | 0 | 0 | 3  | 200    |
| LGR5    | colorectal cancer    | 2 | 7  | 3 | 0 | 12 | 191.67 |
| LGR5    | stomach cancer       | 2 | 7  | 1 | 2 | 12 | 175    |
| LGR5    | liver cancer         | 0 | 7  | 4 | 1 | 12 | 150    |
| LILRA4  | ovarian cancer       | 3 | 4  | 3 | 2 | 12 | 166.67 |
| LILRA4  | head and neck cancer | 0 | 3  | 0 | 1 | 4  | 150    |
| LMAN2   | breast cancer        | 2 | 6  | 0 | 3 | 11 | 163.64 |
| LMBRD1  | carcinoid            | 1 | 2  | 0 | 1 | 4  | 175    |
| LMBRD1  | pancreatic cancer    | 0 | 9  | 3 | 0 | 12 | 175    |
| LMBRD1  | thyroid cancer       | 0 | 3  | 1 | 0 | 4  | 175    |
| LMBRD1  | colorectal cancer    | 0 | 7  | 3 | 1 | 11 | 154.55 |
| LMBRD1  | renal cancer         | 0 | 6  | 3 | 1 | 10 | 150    |
| LRFN3   | thyroid cancer       | 2 | 1  | 0 | 1 | 4  | 200    |
| LRFN3   | prostate cancer      | 0 | 7  | 4 | 1 | 12 | 150    |
| LRFN4   | glioma               | 6 | 2  | 2 | 1 | 11 | 218.18 |
| LRIG2   | renal cancer         | 0 | 12 | 0 | 0 | 12 | 200    |
| LRIG3   | endometrial cancer   | 0 | 12 | 0 | 0 | 12 | 200    |
| LRIG3   | thyroid cancer       | 0 | 4  | 0 | 0 | 4  | 200    |
| LRIG3   | urothelial cancer    | 0 | 12 | 0 | 0 | 12 | 200    |
| LRIG3   | ovarian cancer       | 0 | 11 | 1 | 0 | 12 | 191.67 |
| LRIG3   | skin cancer          | 0 | 10 | 1 | 0 | 11 | 190.91 |

|               |                      |   |    |   |   |    |        |
|---------------|----------------------|---|----|---|---|----|--------|
| <b>LRIG3</b>  | breast cancer        | 0 | 10 | 2 | 0 | 12 | 183.33 |
| <b>LRIG3</b>  | melanoma             | 0 | 9  | 2 | 0 | 11 | 181.82 |
| <b>LRIG3</b>  | stomach cancer       | 0 | 9  | 2 | 0 | 11 | 181.82 |
| <b>LRIG3</b>  | glioma               | 2 | 5  | 5 | 0 | 12 | 175    |
| <b>LRIG3</b>  | carcinoid            | 0 | 3  | 1 | 0 | 4  | 175    |
| <b>LRIG3</b>  | cervical cancer      | 0 | 9  | 3 | 0 | 12 | 175    |
| <b>LRIG3</b>  | head and neck cancer | 0 | 3  | 1 | 0 | 4  | 175    |
| <b>LRIG3</b>  | lung cancer          | 1 | 8  | 2 | 1 | 12 | 175    |
| <b>LRIG3</b>  | testis cancer        | 0 | 9  | 3 | 0 | 12 | 175    |
| <b>LRIG3</b>  | pancreatic cancer    | 0 | 9  | 2 | 1 | 12 | 166.67 |
| <b>LRIG3</b>  | prostate cancer      | 0 | 8  | 4 | 0 | 12 | 166.67 |
| <b>LRIG3</b>  | liver cancer         | 0 | 8  | 3 | 1 | 12 | 158.33 |
| <b>LRP1B</b>  | liver cancer         | 5 | 3  | 0 | 3 | 11 | 190.91 |
| <b>LRP4</b>   | colorectal cancer    | 1 | 10 | 1 | 0 | 12 | 200    |
| <b>LRP4</b>   | pancreatic cancer    | 0 | 12 | 0 | 0 | 12 | 200    |
| <b>LRP4</b>   | prostate cancer      | 0 | 10 | 0 | 0 | 10 | 200    |
| <b>LRP4</b>   | stomach cancer       | 0 | 10 | 2 | 0 | 12 | 183.33 |
| <b>LRP4</b>   | ovarian cancer       | 0 | 9  | 2 | 0 | 11 | 181.82 |
| <b>LRP4</b>   | liver cancer         | 0 | 10 | 1 | 1 | 12 | 175    |
| <b>LRP4</b>   | melanoma             | 0 | 9  | 2 | 1 | 12 | 166.67 |
| <b>LRP4</b>   | testis cancer        | 0 | 9  | 2 | 1 | 12 | 166.67 |
| <b>LRP4</b>   | urothelial cancer    | 0 | 8  | 4 | 0 | 12 | 166.67 |
| <b>LRP4</b>   | breast cancer        | 0 | 9  | 1 | 2 | 12 | 158.33 |
| <b>LRP4</b>   | endometrial cancer   | 0 | 6  | 3 | 1 | 10 | 150    |
| <b>LRP4</b>   | thyroid cancer       | 0 | 2  | 2 | 0 | 4  | 150    |
| <b>LRP6</b>   | carcinoid            | 0 | 3  | 0 | 0 | 3  | 200    |
| <b>LRP6</b>   | melanoma             | 1 | 8  | 3 | 0 | 12 | 183.33 |
| <b>LRP6</b>   | colorectal cancer    | 1 | 6  | 4 | 0 | 11 | 172.73 |
| <b>LRP6</b>   | ovarian cancer       | 0 | 7  | 4 | 0 | 11 | 163.64 |
| <b>LRP6</b>   | lung cancer          | 0 | 6  | 5 | 0 | 11 | 154.55 |
| <b>LRP6</b>   | thyroid cancer       | 0 | 2  | 2 | 0 | 4  | 150    |
| <b>LRRC24</b> | prostate cancer      | 5 | 4  | 1 | 1 | 11 | 218.18 |
| <b>LRRC24</b> | thyroid cancer       | 2 | 0  | 0 | 2 | 4  | 150    |
| <b>LRRC25</b> | liver cancer         | 3 | 6  | 0 | 1 | 10 | 210    |
| <b>LRRC25</b> | pancreatic cancer    | 2 | 4  | 2 | 0 | 8  | 200    |
| <b>LRRC25</b> | thyroid cancer       | 1 | 1  | 1 | 0 | 3  | 200    |
| <b>LRRC25</b> | endometrial cancer   | 1 | 6  | 5 | 0 | 12 | 166.67 |
| <b>LRRC3B</b> | prostate cancer      | 9 | 1  | 0 | 0 | 10 | 290    |
| <b>LRRC3B</b> | colorectal cancer    | 7 | 2  | 0 | 0 | 9  | 277.78 |
| <b>LRRC3B</b> | carcinoid            | 3 | 1  | 0 | 0 | 4  | 275    |



|               |                      |   |    |   |   |    |        |
|---------------|----------------------|---|----|---|---|----|--------|
| <b>LRR3B</b>  | endometrial cancer   | 8 | 3  | 0 | 0 | 11 | 272.73 |
| <b>LRR3B</b>  | breast cancer        | 7 | 4  | 0 | 0 | 11 | 263.64 |
| <b>LRR3B</b>  | thyroid cancer       | 1 | 3  | 0 | 0 | 4  | 225    |
| <b>LRR3B</b>  | cervical cancer      | 1 | 8  | 0 | 0 | 9  | 211.11 |
| <b>LRR3B</b>  | glioma               | 1 | 10 | 0 | 0 | 11 | 209.09 |
| <b>LRR3B</b>  | ovarian cancer       | 2 | 8  | 1 | 0 | 11 | 209.09 |
| <b>LRR3B</b>  | lymphoma             | 2 | 7  | 1 | 1 | 11 | 190.91 |
| <b>LRR3B</b>  | renal cancer         | 0 | 8  | 2 | 0 | 10 | 180    |
| <b>LRR3B</b>  | liver cancer         | 1 | 6  | 3 | 1 | 11 | 163.64 |
| <b>LRR3B</b>  | head and neck cancer | 0 | 1  | 1 | 0 | 2  | 150    |
| <b>LRR2</b>   | liver cancer         | 0 | 9  | 2 | 1 | 12 | 166.67 |
| <b>LRR4CL</b> | endometrial cancer   | 4 | 7  | 0 | 0 | 11 | 236.36 |
| <b>LRR4CL</b> | colorectal cancer    | 4 | 8  | 0 | 0 | 12 | 233.33 |
| <b>LRR4CL</b> | melanoma             | 1 | 10 | 0 | 0 | 11 | 209.09 |
| <b>LRR4CL</b> | breast cancer        | 3 | 6  | 3 | 0 | 12 | 200    |
| <b>LRR4CL</b> | carcinoid            | 1 | 2  | 0 | 1 | 4  | 175    |
| <b>LRR4CL</b> | head and neck cancer | 0 | 3  | 1 | 0 | 4  | 175    |
| <b>LRR4CL</b> | urothelial cancer    | 1 | 7  | 3 | 1 | 12 | 166.67 |
| <b>LRR4CL</b> | pancreatic cancer    | 0 | 8  | 2 | 1 | 11 | 163.64 |
| <b>LYPD5</b>  | breast cancer        | 2 | 7  | 1 | 0 | 10 | 210    |
| <b>LYPD5</b>  | head and neck cancer | 1 | 2  | 1 | 0 | 4  | 200    |
| <b>LYPD5</b>  | melanoma             | 1 | 6  | 1 | 0 | 8  | 200    |
| <b>LYPD5</b>  | glioma               | 0 | 9  | 2 | 0 | 11 | 181.82 |
| <b>LYPD5</b>  | colorectal cancer    | 2 | 5  | 2 | 1 | 10 | 180    |
| <b>LYPD5</b>  | urothelial cancer    | 2 | 6  | 3 | 1 | 12 | 175    |
| <b>LYPD5</b>  | cervical cancer      | 0 | 9  | 2 | 1 | 12 | 166.67 |
| <b>LYPD5</b>  | thyroid cancer       | 0 | 2  | 2 | 0 | 4  | 150    |
| <b>MALRD1</b> | liver cancer         | 1 | 7  | 1 | 3 | 12 | 150    |
| <b>MC3R</b>   | thyroid cancer       | 0 | 3  | 1 | 0 | 4  | 175    |
| <b>MC3R</b>   | colorectal cancer    | 3 | 3  | 3 | 3 | 12 | 150    |
| <b>MCOLN1</b> | thyroid cancer       | 2 | 1  | 0 | 0 | 3  | 266.67 |
| <b>MCOLN1</b> | prostate cancer      | 6 | 2  | 2 | 0 | 10 | 240    |
| <b>MCOLN1</b> | liver cancer         | 0 | 9  | 2 | 1 | 12 | 166.67 |
| <b>MEGF8</b>  | thyroid cancer       | 0 | 3  | 0 | 1 | 4  | 150    |
| <b>MFSD12</b> | thyroid cancer       | 3 | 0  | 1 | 0 | 4  | 250    |
| <b>MFSD12</b> | testis cancer        | 2 | 7  | 1 | 0 | 10 | 210    |
| <b>MFSD12</b> | glioma               | 1 | 10 | 1 | 0 | 12 | 200    |
| <b>MFSD12</b> | colorectal cancer    | 2 | 8  | 0 | 2 | 12 | 183.33 |
| <b>MFSD12</b> | melanoma             | 1 | 9  | 1 | 1 | 12 | 183.33 |
| <b>MFSD12</b> | breast cancer        | 1 | 8  | 1 | 1 | 11 | 181.82 |

|        |                      |    |    |   |   |    |        |
|--------|----------------------|----|----|---|---|----|--------|
| MFSD12 | carcinoid            | 0  | 3  | 1 | 0 | 4  | 175    |
| MFSD5  | head and neck cancer | 1  | 0  | 0 | 0 | 1  | 300    |
| MFSD5  | thyroid cancer       | 0  | 2  | 2 | 0 | 4  | 150    |
| MMP14  | renal cancer         | 0  | 7  | 5 | 0 | 12 | 158.33 |
| MMP14  | head and neck cancer | 0  | 3  | 0 | 1 | 4  | 150    |
| MPEG1  | colorectal cancer    | 0  | 7  | 2 | 0 | 9  | 177.78 |
| MPEG1  | head and neck cancer | 0  | 3  | 1 | 0 | 4  | 175    |
| MPEG1  | pancreatic cancer    | 0  | 5  | 4 | 0 | 9  | 155.56 |
| MPEG1  | prostate cancer      | 0  | 6  | 5 | 0 | 11 | 154.55 |
| MPEG1  | breast cancer        | 0  | 6  | 6 | 0 | 12 | 150    |
| MPEG1  | renal cancer         | 0  | 8  | 2 | 2 | 12 | 150    |
| MPZL1  | prostate cancer      | 0  | 10 | 2 | 0 | 12 | 183.33 |
| MPZL1  | renal cancer         | 0  | 9  | 2 | 1 | 12 | 166.67 |
| MPZL1  | liver cancer         | 0  | 7  | 5 | 0 | 12 | 158.33 |
| MPZL2  | pancreatic cancer    | 0  | 7  | 1 | 0 | 8  | 187.5  |
| MPZL2  | prostate cancer      | 0  | 9  | 1 | 1 | 11 | 172.73 |
| MS4A1  | lymphoma             | 11 | 1  | 0 | 0 | 12 | 291.67 |
| MSLN   | pancreatic cancer    | 4  | 5  | 1 | 2 | 12 | 191.67 |
| MSLN   | ovarian cancer       | 3  | 6  | 1 | 2 | 12 | 183.33 |
| MUC15  | thyroid cancer       | 3  | 0  | 1 | 0 | 4  | 250    |
| MUC16  | ovarian cancer       | 5  | 5  | 0 | 1 | 11 | 227.27 |
| NCAM2  | renal cancer         | 2  | 4  | 4 | 1 | 11 | 163.64 |
| NEO1   | colorectal cancer    | 1  | 9  | 2 | 0 | 12 | 191.67 |
| NEO1   | breast cancer        | 0  | 10 | 2 | 0 | 12 | 183.33 |
| NEO1   | endometrial cancer   | 1  | 7  | 3 | 0 | 11 | 181.82 |
| NEO1   | thyroid cancer       | 0  | 3  | 1 | 0 | 4  | 175    |
| NEO1   | prostate cancer      | 0  | 6  | 4 | 0 | 10 | 160    |
| NEO1   | stomach cancer       | 0  | 6  | 6 | 0 | 12 | 150    |
| NETO2  | colorectal cancer    | 5  | 7  | 0 | 0 | 12 | 241.67 |
| NETO2  | endometrial cancer   | 3  | 8  | 0 | 0 | 11 | 227.27 |
| NETO2  | ovarian cancer       | 2  | 8  | 0 | 0 | 10 | 220    |
| NETO2  | prostate cancer      | 2  | 9  | 0 | 0 | 11 | 218.18 |
| NETO2  | pancreatic cancer    | 2  | 7  | 1 | 0 | 10 | 210    |
| NETO2  | stomach cancer       | 2  | 9  | 1 | 0 | 12 | 208.33 |
| NETO2  | glioma               | 0  | 12 | 0 | 0 | 12 | 200    |
| NETO2  | head and neck cancer | 0  | 3  | 0 | 0 | 3  | 200    |
| NETO2  | thyroid cancer       | 1  | 2  | 1 | 0 | 4  | 200    |
| NETO2  | breast cancer        | 0  | 11 | 1 | 0 | 12 | 191.67 |
| NETO2  | lymphoma             | 0  | 11 | 1 | 0 | 12 | 191.67 |
| NETO2  | urothelial cancer    | 0  | 10 | 1 | 0 | 11 | 190.91 |

|        |                      |   |    |   |   |    |        |
|--------|----------------------|---|----|---|---|----|--------|
| NETO2  | cervical cancer      | 0 | 10 | 2 | 0 | 12 | 183.33 |
| NETO2  | melanoma             | 0 | 8  | 2 | 0 | 10 | 180    |
| NETO2  | carcinoid            | 0 | 3  | 1 | 0 | 4  | 175    |
| NETO2  | liver cancer         | 0 | 10 | 1 | 1 | 12 | 175    |
| NETO2  | lung cancer          | 0 | 8  | 4 | 0 | 12 | 166.67 |
| NETO2  | renal cancer         | 0 | 7  | 5 | 0 | 12 | 158.33 |
| NIPAL1 | colorectal cancer    | 1 | 6  | 3 | 1 | 11 | 163.64 |
| NLGN4X | glioma               | 4 | 4  | 2 | 0 | 10 | 220    |
| NLGN4Y | glioma               | 4 | 4  | 2 | 0 | 10 | 220    |
| NOTCH2 | testis cancer        | 0 | 11 | 1 | 0 | 12 | 191.67 |
| NOTCH2 | lung cancer          | 0 | 10 | 2 | 0 | 12 | 183.33 |
| NOTCH2 | melanoma             | 0 | 9  | 2 | 0 | 11 | 181.82 |
| NOTCH2 | ovarian cancer       | 0 | 9  | 3 | 0 | 12 | 175    |
| NOTCH2 | prostate cancer      | 0 | 8  | 4 | 0 | 12 | 166.67 |
| NOTCH2 | thyroid cancer       | 0 | 2  | 1 | 0 | 3  | 166.67 |
| NOTCH2 | skin cancer          | 0 | 7  | 4 | 0 | 11 | 163.64 |
| NOTCH2 | urothelial cancer    | 0 | 8  | 3 | 1 | 12 | 158.33 |
| NOTCH2 | cervical cancer      | 0 | 6  | 6 | 0 | 12 | 150    |
| NOTCH3 | carcinoid            | 2 | 1  | 1 | 0 | 4  | 225    |
| NOTCH3 | colorectal cancer    | 2 | 9  | 1 | 0 | 12 | 208.33 |
| NOTCH3 | thyroid cancer       | 0 | 4  | 0 | 0 | 4  | 200    |
| NOTCH3 | endometrial cancer   | 2 | 7  | 1 | 1 | 11 | 190.91 |
| NOTCH3 | breast cancer        | 3 | 6  | 1 | 2 | 12 | 183.33 |
| NOTCH3 | urothelial cancer    | 1 | 6  | 5 | 0 | 12 | 166.67 |
| NOTCH3 | skin cancer          | 2 | 5  | 3 | 2 | 12 | 158.33 |
| NOTCH3 | glioma               | 1 | 6  | 2 | 2 | 11 | 154.55 |
| NOTCH3 | cervical cancer      | 2 | 3  | 6 | 1 | 12 | 150    |
| NOTCH3 | head and neck cancer | 0 | 2  | 2 | 0 | 4  | 150    |
| NOTCH3 | lymphoma             | 1 | 5  | 2 | 2 | 10 | 150    |
| NPY4R  | breast cancer        | 5 | 6  | 0 | 0 | 11 | 245.45 |
| NPY4R  | colorectal cancer    | 5 | 5  | 1 | 0 | 11 | 236.36 |
| NPY4R  | ovarian cancer       | 4 | 6  | 1 | 1 | 12 | 208.33 |
| NPY4R  | carcinoid            | 1 | 2  | 1 | 0 | 4  | 200    |
| NPY4R  | thyroid cancer       | 1 | 2  | 1 | 0 | 4  | 200    |
| NPY4R  | stomach cancer       | 3 | 6  | 1 | 2 | 12 | 183.33 |
| NPY4R  | pancreatic cancer    | 3 | 4  | 1 | 2 | 10 | 180    |
| NPY4R  | prostate cancer      | 0 | 7  | 5 | 0 | 12 | 158.33 |
| NPY4R  | cervical cancer      | 2 | 4  | 3 | 2 | 11 | 154.55 |
| NPY4R  | lung cancer          | 1 | 5  | 5 | 1 | 12 | 150    |
| NPY4R  | head and neck cancer | 0 | 2  | 2 | 0 | 4  | 150    |

|               |                      |    |   |   |   |    |        |
|---------------|----------------------|----|---|---|---|----|--------|
| <b>NRCAM</b>  | thyroid cancer       | 0  | 2 | 2 | 0 | 4  | 150    |
| <b>NRG1</b>   | lymphoma             | 3  | 4 | 5 | 0 | 12 | 183.33 |
| <b>NRG2</b>   | head and neck cancer | 0  | 3 | 1 | 0 | 4  | 175    |
| <b>NRP1</b>   | ovarian cancer       | 2  | 9 | 1 | 0 | 12 | 208.33 |
| <b>NRP1</b>   | colorectal cancer    | 1  | 9 | 0 | 1 | 11 | 190.91 |
| <b>NRP1</b>   | stomach cancer       | 0  | 9 | 3 | 0 | 12 | 175    |
| <b>NRP1</b>   | testis cancer        | 0  | 8 | 3 | 1 | 12 | 158.33 |
| <b>NRP1</b>   | liver cancer         | 1  | 6 | 3 | 2 | 12 | 150    |
| <b>OPALIN</b> | prostate cancer      | 0  | 9 | 0 | 0 | 9  | 200    |
| <b>OPN3</b>   | prostate cancer      | 0  | 6 | 5 | 0 | 11 | 154.55 |
| <b>OPN3</b>   | liver cancer         | 0  | 8 | 2 | 2 | 12 | 150    |
| <b>OPN3</b>   | thyroid cancer       | 0  | 2 | 2 | 0 | 4  | 150    |
| <b>OPN5</b>   | testis cancer        | 3  | 3 | 3 | 3 | 12 | 150    |
| <b>OSMR</b>   | endometrial cancer   | 2  | 8 | 1 | 0 | 11 | 209.09 |
| <b>OSMR</b>   | colorectal cancer    | 0  | 9 | 2 | 0 | 11 | 181.82 |
| <b>OSMR</b>   | cervical cancer      | 2  | 6 | 3 | 1 | 12 | 175    |
| <b>OSMR</b>   | skin cancer          | 0  | 9 | 1 | 1 | 11 | 172.73 |
| <b>OSMR</b>   | melanoma             | 2  | 6 | 0 | 3 | 11 | 163.64 |
| <b>OSMR</b>   | urothelial cancer    | 3  | 2 | 5 | 1 | 11 | 163.64 |
| <b>OSMR</b>   | stomach cancer       | 2  | 3 | 5 | 1 | 11 | 154.55 |
| <b>OSMR</b>   | lung cancer          | 1  | 6 | 3 | 2 | 12 | 150    |
| <b>OSMR</b>   | testis cancer        | 0  | 7 | 1 | 2 | 10 | 150    |
| <b>OSMR</b>   | thyroid cancer       | 0  | 3 | 0 | 1 | 4  | 150    |
| <b>P2RX6</b>  | prostate cancer      | 0  | 9 | 1 | 2 | 12 | 158.33 |
| <b>P2RY11</b> | colorectal cancer    | 9  | 0 | 0 | 0 | 9  | 300    |
| <b>P2RY11</b> | head and neck cancer | 4  | 0 | 0 | 0 | 4  | 300    |
| <b>P2RY11</b> | lymphoma             | 12 | 0 | 0 | 0 | 12 | 300    |
| <b>P2RY11</b> | thyroid cancer       | 4  | 0 | 0 | 0 | 4  | 300    |
| <b>P2RY11</b> | testis cancer        | 10 | 1 | 0 | 0 | 11 | 290.91 |
| <b>P2RY11</b> | stomach cancer       | 9  | 1 | 0 | 0 | 10 | 290    |
| <b>P2RY11</b> | carcinoid            | 3  | 1 | 0 | 0 | 4  | 275    |
| <b>P2RY11</b> | melanoma             | 10 | 1 | 1 | 0 | 12 | 275    |
| <b>P2RY11</b> | breast cancer        | 6  | 3 | 0 | 0 | 9  | 266.67 |
| <b>P2RY11</b> | cervical cancer      | 8  | 3 | 0 | 1 | 12 | 250    |
| <b>P2RY11</b> | endometrial cancer   | 6  | 3 | 1 | 0 | 10 | 250    |
| <b>P2RY11</b> | ovarian cancer       | 7  | 3 | 0 | 1 | 11 | 245.45 |
| <b>P2RY11</b> | skin cancer          | 7  | 3 | 0 | 1 | 11 | 245.45 |
| <b>P2RY11</b> | prostate cancer      | 5  | 3 | 0 | 1 | 9  | 233.33 |
| <b>P2RY11</b> | glioma               | 7  | 3 | 0 | 2 | 12 | 225    |
| <b>P2RY11</b> | pancreatic cancer    | 5  | 3 | 2 | 1 | 11 | 209.09 |

|         |                      |   |    |   |   |    |        |
|---------|----------------------|---|----|---|---|----|--------|
| P2RY11  | urothelial cancer    | 3 | 6  | 2 | 0 | 11 | 209.09 |
| P2RY11  | lung cancer          | 2 | 6  | 1 | 2 | 11 | 172.73 |
| P2RY14  | head and neck cancer | 3 | 0  | 0 | 0 | 3  | 300    |
| P2RY14  | ovarian cancer       | 5 | 5  | 0 | 0 | 10 | 250    |
| P2RY14  | colorectal cancer    | 5 | 7  | 0 | 0 | 12 | 241.67 |
| P2RY14  | liver cancer         | 3 | 7  | 1 | 0 | 11 | 218.18 |
| P2RY14  | breast cancer        | 2 | 10 | 0 | 0 | 12 | 216.67 |
| P2RY14  | stomach cancer       | 3 | 8  | 1 | 0 | 12 | 216.67 |
| P2RY14  | pancreatic cancer    | 2 | 7  | 1 | 0 | 10 | 210    |
| P2RY14  | skin cancer          | 2 | 7  | 1 | 0 | 10 | 210    |
| P2RY14  | melanoma             | 1 | 11 | 0 | 0 | 12 | 208.33 |
| P2RY14  | carcinoid            | 0 | 4  | 0 | 0 | 4  | 200    |
| P2RY14  | cervical cancer      | 3 | 6  | 3 | 0 | 12 | 200    |
| P2RY14  | thyroid cancer       | 0 | 4  | 0 | 0 | 4  | 200    |
| P2RY14  | endometrial cancer   | 2 | 7  | 1 | 1 | 11 | 190.91 |
| P2RY14  | lung cancer          | 2 | 7  | 0 | 2 | 11 | 181.82 |
| P2RY14  | prostate cancer      | 0 | 8  | 1 | 1 | 10 | 170    |
| P2RY14  | urothelial cancer    | 1 | 7  | 1 | 2 | 11 | 163.64 |
| PCDH19  | carcinoid            | 0 | 3  | 0 | 1 | 4  | 150    |
| PCDH7   | colorectal cancer    | 8 | 4  | 0 | 0 | 12 | 266.67 |
| PCDH7   | melanoma             | 3 | 7  | 1 | 0 | 11 | 218.18 |
| PCDH7   | ovarian cancer       | 4 | 5  | 3 | 0 | 12 | 208.33 |
| PCDH7   | pancreatic cancer    | 3 | 8  | 0 | 1 | 12 | 208.33 |
| PCDH7   | stomach cancer       | 3 | 6  | 1 | 1 | 11 | 200    |
| PCDH7   | lymphoma             | 0 | 7  | 5 | 0 | 12 | 158.33 |
| PCDHA12 | glioma               | 0 | 8  | 2 | 2 | 12 | 150    |
| PCDHA5  | carcinoid            | 0 | 4  | 0 | 0 | 4  | 200    |
| PCDHB10 | carcinoid            | 1 | 3  | 0 | 0 | 4  | 225    |
| PCDHB10 | liver cancer         | 0 | 10 | 0 | 0 | 10 | 200    |
| PCDHB10 | pancreatic cancer    | 2 | 5  | 2 | 0 | 9  | 200    |
| PCDHB10 | testis cancer        | 0 | 9  | 2 | 0 | 11 | 181.82 |
| PCDHB10 | endometrial cancer   | 0 | 9  | 3 | 0 | 12 | 175    |
| PCDHB10 | head and neck cancer | 0 | 3  | 1 | 0 | 4  | 175    |
| PCDHB10 | thyroid cancer       | 1 | 1  | 2 | 0 | 4  | 175    |
| PCDHB10 | urothelial cancer    | 0 | 7  | 3 | 0 | 10 | 170    |
| PCDHB10 | stomach cancer       | 0 | 6  | 4 | 0 | 10 | 160    |
| PCDHB10 | colorectal cancer    | 0 | 6  | 3 | 1 | 10 | 150    |
| PCDHB5  | lymphoma             | 8 | 2  | 0 | 2 | 12 | 233.33 |
| PCDHB7  | ovarian cancer       | 3 | 6  | 2 | 0 | 11 | 209.09 |
| PCDHB7  | head and neck cancer | 0 | 4  | 0 | 0 | 4  | 200    |

|                 |                      |    |    |   |   |    |        |
|-----------------|----------------------|----|----|---|---|----|--------|
| <b>PCDHB7</b>   | skin cancer          | 1  | 10 | 1 | 0 | 12 | 200    |
| <b>PCDHB7</b>   | stomach cancer       | 1  | 8  | 3 | 0 | 12 | 183.33 |
| <b>PCDHB7</b>   | cervical cancer      | 1  | 8  | 1 | 1 | 11 | 181.82 |
| <b>PCDHB7</b>   | lung cancer          | 1  | 8  | 1 | 1 | 11 | 181.82 |
| <b>PCDHB7</b>   | breast cancer        | 1  | 6  | 1 | 1 | 9  | 177.78 |
| <b>PCDHB7</b>   | thyroid cancer       | 0  | 3  | 1 | 0 | 4  | 175    |
| <b>PCDHB7</b>   | glioma               | 0  | 8  | 3 | 0 | 11 | 172.73 |
| <b>PCDHB7</b>   | carcinoid            | 0  | 3  | 0 | 1 | 4  | 150    |
| <b>PCDHGA11</b> | glioma               | 10 | 2  | 0 | 0 | 12 | 283.33 |
| <b>PCDHGA11</b> | melanoma             | 6  | 5  | 1 | 0 | 12 | 241.67 |
| <b>PCDHGA11</b> | carcinoid            | 1  | 1  | 2 | 0 | 4  | 175    |
| <b>PCDHGA11</b> | head and neck cancer | 0  | 3  | 1 | 0 | 4  | 175    |
| <b>PCDHGA11</b> | prostate cancer      | 1  | 4  | 7 | 0 | 12 | 150    |
| <b>PCDHGA11</b> | thyroid cancer       | 0  | 2  | 2 | 0 | 4  | 150    |
| <b>PCDHGA12</b> | glioma               | 10 | 2  | 0 | 0 | 12 | 283.33 |
| <b>PCDHGA12</b> | melanoma             | 6  | 5  | 1 | 0 | 12 | 241.67 |
| <b>PCDHGA12</b> | carcinoid            | 1  | 1  | 2 | 0 | 4  | 175    |
| <b>PCDHGA12</b> | head and neck cancer | 0  | 3  | 1 | 0 | 4  | 175    |
| <b>PCDHGA12</b> | prostate cancer      | 1  | 4  | 7 | 0 | 12 | 150    |
| <b>PCDHGA12</b> | thyroid cancer       | 0  | 2  | 2 | 0 | 4  | 150    |
| <b>PCDHGA2</b>  | glioma               | 10 | 2  | 0 | 0 | 12 | 283.33 |
| <b>PCDHGA2</b>  | melanoma             | 6  | 5  | 1 | 0 | 12 | 241.67 |
| <b>PCDHGA2</b>  | carcinoid            | 1  | 1  | 2 | 0 | 4  | 175    |
| <b>PCDHGA2</b>  | head and neck cancer | 0  | 3  | 1 | 0 | 4  | 175    |
| <b>PCDHGA2</b>  | prostate cancer      | 1  | 4  | 7 | 0 | 12 | 150    |
| <b>PCDHGA2</b>  | thyroid cancer       | 0  | 2  | 2 | 0 | 4  | 150    |
| <b>PCDHGA5</b>  | glioma               | 10 | 2  | 0 | 0 | 12 | 283.33 |
| <b>PCDHGA5</b>  | melanoma             | 6  | 5  | 1 | 0 | 12 | 241.67 |
| <b>PCDHGA5</b>  | carcinoid            | 1  | 1  | 2 | 0 | 4  | 175    |
| <b>PCDHGA5</b>  | head and neck cancer | 0  | 3  | 1 | 0 | 4  | 175    |
| <b>PCDHGA5</b>  | prostate cancer      | 1  | 4  | 7 | 0 | 12 | 150    |
| <b>PCDHGA5</b>  | thyroid cancer       | 0  | 2  | 2 | 0 | 4  | 150    |
| <b>PCDHGA6</b>  | glioma               | 10 | 2  | 0 | 0 | 12 | 283.33 |
| <b>PCDHGA6</b>  | melanoma             | 6  | 5  | 1 | 0 | 12 | 241.67 |
| <b>PCDHGA6</b>  | carcinoid            | 1  | 1  | 2 | 0 | 4  | 175    |
| <b>PCDHGA6</b>  | head and neck cancer | 0  | 3  | 1 | 0 | 4  | 175    |
| <b>PCDHGA6</b>  | prostate cancer      | 1  | 4  | 7 | 0 | 12 | 150    |
| <b>PCDHGA6</b>  | thyroid cancer       | 0  | 2  | 2 | 0 | 4  | 150    |
| <b>PCDHGB7</b>  | glioma               | 10 | 2  | 0 | 0 | 12 | 283.33 |
| <b>PCDHGB7</b>  | melanoma             | 6  | 5  | 1 | 0 | 12 | 241.67 |

|                |                      |    |    |   |   |    |        |
|----------------|----------------------|----|----|---|---|----|--------|
| <b>PCDHGB7</b> | carcinoid            | 1  | 1  | 2 | 0 | 4  | 175    |
| <b>PCDHGB7</b> | head and neck cancer | 0  | 3  | 1 | 0 | 4  | 175    |
| <b>PCDHGB7</b> | prostate cancer      | 1  | 4  | 7 | 0 | 12 | 150    |
| <b>PCDHGB7</b> | thyroid cancer       | 0  | 2  | 2 | 0 | 4  | 150    |
| <b>PCDHGC3</b> | glioma               | 10 | 2  | 0 | 0 | 12 | 283.33 |
| <b>PCDHGC3</b> | melanoma             | 6  | 5  | 1 | 0 | 12 | 241.67 |
| <b>PCDHGC3</b> | carcinoid            | 1  | 1  | 2 | 0 | 4  | 175    |
| <b>PCDHGC3</b> | head and neck cancer | 0  | 3  | 1 | 0 | 4  | 175    |
| <b>PCDHGC3</b> | prostate cancer      | 1  | 4  | 7 | 0 | 12 | 150    |
| <b>PCDHGC3</b> | thyroid cancer       | 0  | 2  | 2 | 0 | 4  | 150    |
| <b>PLXNA2</b>  | lymphoma             | 9  | 2  | 1 | 0 | 12 | 266.67 |
| <b>PLXNA2</b>  | colorectal cancer    | 5  | 6  | 1 | 0 | 12 | 233.33 |
| <b>PLXNA2</b>  | stomach cancer       | 0  | 7  | 4 | 0 | 11 | 163.64 |
| <b>PLXNA2</b>  | endometrial cancer   | 2  | 2  | 7 | 0 | 11 | 154.55 |
| <b>PLXNA2</b>  | ovarian cancer       | 0  | 6  | 3 | 1 | 10 | 150    |
| <b>PLXNA2</b>  | urothelial cancer    | 0  | 7  | 4 | 1 | 12 | 150    |
| <b>PQLC2</b>   | testis cancer        | 0  | 6  | 3 | 1 | 10 | 150    |
| <b>PRIMA1</b>  | thyroid cancer       | 0  | 4  | 0 | 0 | 4  | 200    |
| <b>PROM1</b>   | colorectal cancer    | 10 | 2  | 0 | 0 | 12 | 283.33 |
| <b>PROM1</b>   | endometrial cancer   | 10 | 0  | 1 | 1 | 12 | 258.33 |
| <b>PROM1</b>   | pancreatic cancer    | 8  | 1  | 2 | 1 | 12 | 233.33 |
| <b>PROM1</b>   | prostate cancer      | 1  | 9  | 1 | 1 | 12 | 183.33 |
| <b>PROM1</b>   | stomach cancer       | 5  | 3  | 0 | 4 | 12 | 175    |
| <b>PROM1</b>   | testis cancer        | 3  | 5  | 1 | 3 | 12 | 166.67 |
| <b>PROM1</b>   | ovarian cancer       | 3  | 3  | 3 | 3 | 12 | 150    |
| <b>PTGER3</b>  | cervical cancer      | 4  | 3  | 0 | 4 | 11 | 163.64 |
| <b>PTGFRN</b>  | head and neck cancer | 1  | 2  | 1 | 0 | 4  | 200    |
| <b>PTGFRN</b>  | prostate cancer      | 2  | 6  | 3 | 0 | 11 | 190.91 |
| <b>PTGFRN</b>  | endometrial cancer   | 2  | 5  | 2 | 1 | 10 | 180    |
| <b>PTGFRN</b>  | urothelial cancer    | 2  | 6  | 1 | 2 | 11 | 172.73 |
| <b>PTGFRN</b>  | skin cancer          | 0  | 7  | 3 | 1 | 11 | 154.55 |
| <b>PTGFRN</b>  | cervical cancer      | 4  | 2  | 2 | 4 | 12 | 150    |
| <b>PTGFRN</b>  | thyroid cancer       | 0  | 2  | 2 | 0 | 4  | 150    |
| <b>PTH1R</b>   | urothelial cancer    | 9  | 2  | 0 | 0 | 11 | 281.82 |
| <b>PTH1R</b>   | thyroid cancer       | 2  | 1  | 1 | 0 | 4  | 225    |
| <b>PTH1R</b>   | breast cancer        | 6  | 0  | 5 | 0 | 11 | 209.09 |
| <b>PTH1R</b>   | pancreatic cancer    | 4  | 2  | 3 | 2 | 11 | 172.73 |
| <b>PTK7</b>    | endometrial cancer   | 0  | 11 | 0 | 0 | 11 | 200    |
| <b>PTK7</b>    | colorectal cancer    | 1  | 7  | 2 | 0 | 10 | 190    |
| <b>PTK7</b>    | prostate cancer      | 0  | 9  | 1 | 0 | 10 | 190    |

|               |                      |   |    |   |   |    |        |
|---------------|----------------------|---|----|---|---|----|--------|
| <b>PTK7</b>   | breast cancer        | 0 | 8  | 4 | 0 | 12 | 166.67 |
| <b>PTK7</b>   | thyroid cancer       | 0 | 2  | 1 | 0 | 3  | 166.67 |
| <b>PTK7</b>   | testis cancer        | 0 | 5  | 4 | 0 | 9  | 155.56 |
| <b>PTK7</b>   | skin cancer          | 0 | 6  | 5 | 0 | 11 | 154.55 |
| <b>PTK7</b>   | head and neck cancer | 0 | 3  | 0 | 1 | 4  | 150    |
| <b>PTPRJ</b>  | carcinoid            | 0 | 4  | 0 | 0 | 4  | 200    |
| <b>PTPRN</b>  | carcinoid            | 1 | 1  | 1 | 1 | 4  | 150    |
| <b>PTPRN2</b> | carcinoid            | 3 | 0  | 0 | 1 | 4  | 225    |
| <b>PTPRR</b>  | prostate cancer      | 3 | 6  | 2 | 0 | 11 | 209.09 |
| <b>PTPRR</b>  | renal cancer         | 1 | 11 | 0 | 0 | 12 | 208.33 |
| <b>PTPRR</b>  | thyroid cancer       | 1 | 1  | 1 | 0 | 3  | 200    |
| <b>PTPRR</b>  | liver cancer         | 2 | 6  | 3 | 0 | 11 | 190.91 |
| <b>PTPRR</b>  | pancreatic cancer    | 1 | 9  | 0 | 2 | 12 | 175    |
| <b>PTPRR</b>  | melanoma             | 1 | 6  | 5 | 0 | 12 | 166.67 |
| <b>PTPRR</b>  | glioma               | 1 | 6  | 4 | 1 | 12 | 158.33 |
| <b>PTPRT</b>  | carcinoid            | 1 | 1  | 1 | 1 | 4  | 150    |
| <b>PTPRU</b>  | endometrial cancer   | 2 | 9  | 0 | 0 | 11 | 218.18 |
| <b>PTPRU</b>  | breast cancer        | 2 | 9  | 1 | 0 | 12 | 208.33 |
| <b>PTPRU</b>  | liver cancer         | 2 | 9  | 1 | 0 | 12 | 208.33 |
| <b>PTPRU</b>  | ovarian cancer       | 2 | 9  | 1 | 0 | 12 | 208.33 |
| <b>PTPRU</b>  | carcinoid            | 1 | 2  | 1 | 0 | 4  | 200    |
| <b>PTPRU</b>  | glioma               | 2 | 7  | 2 | 0 | 11 | 200    |
| <b>PTPRU</b>  | head and neck cancer | 1 | 2  | 1 | 0 | 4  | 200    |
| <b>PTPRU</b>  | prostate cancer      | 1 | 10 | 1 | 0 | 12 | 200    |
| <b>PTPRU</b>  | testis cancer        | 3 | 6  | 3 | 0 | 12 | 200    |
| <b>PTPRU</b>  | colorectal cancer    | 2 | 7  | 3 | 0 | 12 | 191.67 |
| <b>PTPRU</b>  | lung cancer          | 2 | 7  | 3 | 0 | 12 | 191.67 |
| <b>PTPRU</b>  | urothelial cancer    | 0 | 11 | 1 | 0 | 12 | 191.67 |
| <b>PTPRU</b>  | pancreatic cancer    | 1 | 8  | 2 | 0 | 11 | 190.91 |
| <b>PTPRU</b>  | cervical cancer      | 3 | 4  | 5 | 0 | 12 | 183.33 |
| <b>PTPRU</b>  | lymphoma             | 2 | 6  | 2 | 1 | 11 | 181.82 |
| <b>PTPRU</b>  | renal cancer         | 0 | 8  | 4 | 0 | 12 | 166.67 |
| <b>PTPRU</b>  | thyroid cancer       | 0 | 2  | 1 | 0 | 3  | 166.67 |
| <b>PTPRU</b>  | melanoma             | 1 | 5  | 5 | 0 | 11 | 163.64 |
| <b>PTPRU</b>  | skin cancer          | 1 | 5  | 6 | 0 | 12 | 158.33 |
| <b>PTPRU</b>  | stomach cancer       | 0 | 7  | 5 | 0 | 12 | 158.33 |
| <b>PTPRZ1</b> | glioma               | 4 | 3  | 2 | 2 | 11 | 181.82 |
| <b>QRFPR</b>  | colorectal cancer    | 7 | 4  | 0 | 1 | 12 | 241.67 |
| <b>QRFPR</b>  | prostate cancer      | 1 | 6  | 3 | 2 | 12 | 150    |
| <b>QRFPR</b>  | thyroid cancer       | 0 | 3  | 0 | 1 | 4  | 150    |



|               |                      |   |    |   |   |    |        |
|---------------|----------------------|---|----|---|---|----|--------|
| <b>RNF167</b> | melanoma             | 1 | 5  | 2 | 2 | 10 | 150    |
| <b>ROBO1</b>  | glioma               | 3 | 9  | 0 | 0 | 12 | 225    |
| <b>ROBO1</b>  | ovarian cancer       | 1 | 11 | 0 | 0 | 12 | 208.33 |
| <b>ROBO1</b>  | carcinoid            | 0 | 4  | 0 | 0 | 4  | 200    |
| <b>ROBO1</b>  | cervical cancer      | 0 | 11 | 0 | 0 | 11 | 200    |
| <b>ROBO1</b>  | head and neck cancer | 0 | 4  | 0 | 0 | 4  | 200    |
| <b>ROBO1</b>  | melanoma             | 0 | 12 | 0 | 0 | 12 | 200    |
| <b>ROBO1</b>  | skin cancer          | 0 | 12 | 0 | 0 | 12 | 200    |
| <b>ROBO1</b>  | stomach cancer       | 0 | 10 | 0 | 0 | 10 | 200    |
| <b>ROBO1</b>  | thyroid cancer       | 0 | 4  | 0 | 0 | 4  | 200    |
| <b>ROBO1</b>  | breast cancer        | 1 | 9  | 2 | 0 | 12 | 191.67 |
| <b>ROBO1</b>  | endometrial cancer   | 0 | 11 | 1 | 0 | 12 | 191.67 |
| <b>ROBO1</b>  | lung cancer          | 0 | 11 | 1 | 0 | 12 | 191.67 |
| <b>ROBO1</b>  | pancreatic cancer    | 0 | 9  | 1 | 0 | 10 | 190    |
| <b>ROBO1</b>  | prostate cancer      | 0 | 10 | 2 | 0 | 12 | 183.33 |
| <b>ROBO1</b>  | colorectal cancer    | 0 | 10 | 0 | 1 | 11 | 181.82 |
| <b>ROBO1</b>  | renal cancer         | 0 | 9  | 3 | 0 | 12 | 175    |
| <b>ROBO1</b>  | liver cancer         | 1 | 6  | 3 | 1 | 11 | 163.64 |
| <b>ROBO1</b>  | testis cancer        | 1 | 6  | 3 | 1 | 11 | 163.64 |
| <b>ROR2</b>   | pancreatic cancer    | 6 | 3  | 0 | 0 | 9  | 266.67 |
| <b>ROR2</b>   | ovarian cancer       | 7 | 4  | 0 | 0 | 11 | 263.64 |
| <b>ROR2</b>   | colorectal cancer    | 7 | 5  | 0 | 0 | 12 | 258.33 |
| <b>ROR2</b>   | cervical cancer      | 4 | 8  | 0 | 0 | 12 | 233.33 |
| <b>ROR2</b>   | skin cancer          | 4 | 8  | 0 | 0 | 12 | 233.33 |
| <b>ROR2</b>   | head and neck cancer | 1 | 3  | 0 | 0 | 4  | 225    |
| <b>ROR2</b>   | stomach cancer       | 5 | 6  | 0 | 1 | 12 | 225    |
| <b>ROR2</b>   | thyroid cancer       | 1 | 3  | 0 | 0 | 4  | 225    |
| <b>ROR2</b>   | breast cancer        | 2 | 9  | 0 | 0 | 11 | 218.18 |
| <b>ROR2</b>   | melanoma             | 4 | 6  | 2 | 0 | 12 | 216.67 |
| <b>ROR2</b>   | urothelial cancer    | 3 | 8  | 1 | 0 | 12 | 216.67 |
| <b>ROR2</b>   | endometrial cancer   | 2 | 9  | 1 | 0 | 12 | 208.33 |
| <b>ROR2</b>   | liver cancer         | 6 | 3  | 1 | 2 | 12 | 208.33 |
| <b>ROR2</b>   | prostate cancer      | 0 | 11 | 0 | 0 | 11 | 200    |
| <b>ROR2</b>   | lymphoma             | 0 | 11 | 1 | 0 | 12 | 191.67 |
| <b>ROR2</b>   | testis cancer        | 3 | 4  | 1 | 2 | 10 | 180    |
| <b>ROR2</b>   | carcinoid            | 0 | 3  | 1 | 0 | 4  | 175    |
| <b>ROR2</b>   | lung cancer          | 2 | 6  | 1 | 2 | 11 | 172.73 |
| <b>ROR2</b>   | glioma               | 0 | 8  | 3 | 1 | 12 | 158.33 |
| <b>RXFP1</b>  | skin cancer          | 0 | 9  | 2 | 0 | 11 | 181.82 |
| <b>SCN3A</b>  | colorectal cancer    | 0 | 9  | 3 | 0 | 12 | 175    |

|          |                      |   |    |   |   |    |        |
|----------|----------------------|---|----|---|---|----|--------|
| SCN3A    | prostate cancer      | 2 | 6  | 3 | 1 | 12 | 175    |
| SCN3A    | head and neck cancer | 0 | 2  | 2 | 0 | 4  | 150    |
| SCNN1A   | thyroid cancer       | 0 | 4  | 0 | 0 | 4  | 200    |
| SCNN1A   | colorectal cancer    | 0 | 11 | 1 | 0 | 12 | 191.67 |
| SCNN1A   | head and neck cancer | 0 | 3  | 1 | 0 | 4  | 175    |
| SCNN1A   | breast cancer        | 1 | 6  | 5 | 0 | 12 | 166.67 |
| SCNN1A   | melanoma             | 0 | 9  | 2 | 1 | 12 | 166.67 |
| SCNN1A   | endometrial cancer   | 0 | 8  | 3 | 1 | 12 | 158.33 |
| SCNN1A   | ovarian cancer       | 1 | 6  | 2 | 2 | 11 | 154.55 |
| SCNN1A   | prostate cancer      | 0 | 8  | 2 | 2 | 12 | 150    |
| SDK1     | stomach cancer       | 0 | 10 | 0 | 0 | 10 | 200    |
| SDK1     | carcinoid            | 0 | 3  | 1 | 0 | 4  | 175    |
| SDK1     | head and neck cancer | 0 | 3  | 1 | 0 | 4  | 175    |
| SDK1     | thyroid cancer       | 0 | 3  | 1 | 0 | 4  | 175    |
| SDK1     | testis cancer        | 0 | 8  | 3 | 0 | 11 | 172.73 |
| SDK1     | endometrial cancer   | 0 | 8  | 1 | 1 | 10 | 170    |
| SDK1     | ovarian cancer       | 0 | 9  | 2 | 1 | 12 | 166.67 |
| SDK1     | pancreatic cancer    | 0 | 7  | 4 | 1 | 12 | 150    |
| SEMA7A   | renal cancer         | 2 | 9  | 0 | 0 | 11 | 218.18 |
| SEMA7A   | liver cancer         | 2 | 8  | 1 | 1 | 12 | 191.67 |
| SEMA7A   | pancreatic cancer    | 1 | 5  | 3 | 0 | 9  | 177.78 |
| SEZ6L2   | carcinoid            | 0 | 4  | 0 | 0 | 4  | 200    |
| SGCA     | renal cancer         | 0 | 7  | 5 | 0 | 12 | 158.33 |
| SIDT2    | thyroid cancer       | 0 | 3  | 1 | 0 | 4  | 175    |
| SIDT2    | melanoma             | 0 | 6  | 4 | 0 | 10 | 160    |
| SIDT2    | lung cancer          | 0 | 7  | 5 | 0 | 12 | 158.33 |
| SIGLEC10 | lymphoma             | 4 | 5  | 0 | 3 | 12 | 183.33 |
| SIGLEC8  | ovarian cancer       | 1 | 9  | 2 | 0 | 12 | 191.67 |
| SIGLEC8  | stomach cancer       | 1 | 7  | 3 | 0 | 11 | 181.82 |
| SIGLEC8  | pancreatic cancer    | 0 | 5  | 4 | 0 | 9  | 155.56 |
| SIGLEC8  | endometrial cancer   | 0 | 6  | 6 | 0 | 12 | 150    |
| SIGLEC8  | liver cancer         | 0 | 6  | 6 | 0 | 12 | 150    |
| SIRPA    | glioma               | 7 | 2  | 0 | 1 | 10 | 250    |
| SIRPA    | lymphoma             | 4 | 8  | 0 | 0 | 12 | 233.33 |
| SIRPA    | head and neck cancer | 1 | 3  | 0 | 0 | 4  | 225    |
| SIRPA    | colorectal cancer    | 5 | 3  | 1 | 1 | 10 | 220    |
| SIRPA    | melanoma             | 2 | 7  | 2 | 0 | 11 | 200    |
| SIRPA    | carcinoid            | 2 | 0  | 1 | 1 | 4  | 175    |
| SIRPA    | renal cancer         | 2 | 4  | 3 | 2 | 11 | 154.55 |
| SIRPB1   | colorectal cancer    | 1 | 5  | 5 | 0 | 11 | 163.64 |

|                |                      |   |    |   |   |    |        |
|----------------|----------------------|---|----|---|---|----|--------|
| <b>SIT1</b>    | lymphoma             | 5 | 3  | 3 | 0 | 11 | 218.18 |
| <b>SIT1</b>    | stomach cancer       | 0 | 7  | 1 | 2 | 10 | 150    |
| <b>SLAMF9</b>  | colorectal cancer    | 0 | 10 | 0 | 1 | 11 | 181.82 |
| <b>SLC10A1</b> | thyroid cancer       | 1 | 3  | 0 | 0 | 4  | 225    |
| <b>SLC10A1</b> | prostate cancer      | 1 | 9  | 2 | 0 | 12 | 191.67 |
| <b>SLC10A6</b> | head and neck cancer | 1 | 1  | 1 | 1 | 4  | 150    |
| <b>SLC11A2</b> | pancreatic cancer    | 5 | 3  | 2 | 0 | 10 | 230    |
| <b>SLC11A2</b> | thyroid cancer       | 0 | 3  | 1 | 0 | 4  | 175    |
| <b>SLC11A2</b> | stomach cancer       | 0 | 5  | 4 | 0 | 9  | 155.56 |
| <b>SLC12A6</b> | carcinoid            | 0 | 4  | 0 | 0 | 4  | 200    |
| <b>SLC12A6</b> | prostate cancer      | 0 | 12 | 0 | 0 | 12 | 200    |
| <b>SLC12A6</b> | thyroid cancer       | 0 | 3  | 1 | 0 | 4  | 175    |
| <b>SLC12A6</b> | testis cancer        | 0 | 8  | 1 | 2 | 11 | 154.55 |
| <b>SLC12A9</b> | carcinoid            | 1 | 2  | 1 | 0 | 4  | 200    |
| <b>SLC12A9</b> | melanoma             | 3 | 5  | 3 | 1 | 12 | 183.33 |
| <b>SLC12A9</b> | thyroid cancer       | 0 | 3  | 1 | 0 | 4  | 175    |
| <b>SLC12A9</b> | glioma               | 3 | 2  | 6 | 0 | 11 | 172.73 |
| <b>SLC12A9</b> | pancreatic cancer    | 1 | 5  | 6 | 0 | 12 | 158.33 |
| <b>SLC12A9</b> | prostate cancer      | 1 | 5  | 6 | 0 | 12 | 158.33 |
| <b>SLC12A9</b> | ovarian cancer       | 1 | 3  | 5 | 0 | 9  | 155.56 |
| <b>SLC12A9</b> | breast cancer        | 1 | 4  | 3 | 1 | 9  | 155.56 |
| <b>SLC12A9</b> | colorectal cancer    | 0 | 5  | 5 | 0 | 10 | 150    |
| <b>SLC15A1</b> | testis cancer        | 4 | 5  | 1 | 0 | 10 | 230    |
| <b>SLC15A1</b> | thyroid cancer       | 1 | 3  | 0 | 0 | 4  | 225    |
| <b>SLC15A1</b> | colorectal cancer    | 0 | 12 | 0 | 0 | 12 | 200    |
| <b>SLC15A1</b> | endometrial cancer   | 0 | 11 | 0 | 0 | 11 | 200    |
| <b>SLC15A1</b> | head and neck cancer | 0 | 4  | 0 | 0 | 4  | 200    |
| <b>SLC15A1</b> | breast cancer        | 0 | 11 | 1 | 0 | 12 | 191.67 |
| <b>SLC15A1</b> | melanoma             | 0 | 10 | 1 | 0 | 11 | 190.91 |
| <b>SLC15A1</b> | liver cancer         | 1 | 6  | 2 | 0 | 9  | 188.89 |
| <b>SLC15A1</b> | renal cancer         | 2 | 5  | 4 | 0 | 11 | 181.82 |
| <b>SLC15A1</b> | stomach cancer       | 0 | 9  | 2 | 0 | 11 | 181.82 |
| <b>SLC15A1</b> | cervical cancer      | 0 | 8  | 3 | 0 | 11 | 172.73 |
| <b>SLC15A1</b> | ovarian cancer       | 0 | 8  | 3 | 0 | 11 | 172.73 |
| <b>SLC15A1</b> | prostate cancer      | 0 | 8  | 3 | 0 | 11 | 172.73 |
| <b>SLC15A1</b> | carcinoid            | 0 | 2  | 1 | 0 | 3  | 166.67 |
| <b>SLC15A1</b> | lymphoma             | 0 | 8  | 4 | 0 | 12 | 166.67 |
| <b>SLC15A1</b> | lung cancer          | 0 | 7  | 5 | 0 | 12 | 158.33 |
| <b>SLC15A1</b> | urothelial cancer    | 0 | 6  | 5 | 0 | 11 | 154.55 |
| <b>SLC15A4</b> | testis cancer        | 4 | 6  | 1 | 0 | 11 | 227.27 |

|          |                      |   |    |   |   |    |        |
|----------|----------------------|---|----|---|---|----|--------|
| SLC22A16 | stomach cancer       | 0 | 6  | 3 | 0 | 9  | 166.67 |
| SLC22A16 | carcinoid            | 0 | 2  | 2 | 0 | 4  | 150    |
| SLC22A17 | renal cancer         | 5 | 5  | 2 | 0 | 12 | 225    |
| SLC22A17 | glioma               | 2 | 8  | 1 | 0 | 11 | 209.09 |
| SLC22A17 | testis cancer        | 2 | 3  | 7 | 0 | 12 | 158.33 |
| SLC22A17 | carcinoid            | 0 | 2  | 2 | 0 | 4  | 150    |
| SLC22A17 | cervical cancer      | 1 | 4  | 4 | 1 | 10 | 150    |
| SLC22A17 | head and neck cancer | 1 | 0  | 3 | 0 | 4  | 150    |
| SLC22A2  | glioma               | 5 | 1  | 0 | 3 | 9  | 188.89 |
| SLC23A2  | thyroid cancer       | 1 | 3  | 0 | 0 | 4  | 225    |
| SLC23A2  | urothelial cancer    | 3 | 5  | 3 | 1 | 12 | 183.33 |
| SLC26A6  | colorectal cancer    | 0 | 7  | 3 | 1 | 11 | 154.55 |
| SLC26A6  | endometrial cancer   | 0 | 7  | 4 | 1 | 12 | 150    |
| SLC26A6  | head and neck cancer | 0 | 2  | 2 | 0 | 4  | 150    |
| SLC2A14  | testis cancer        | 5 | 1  | 1 | 5 | 12 | 150    |
| SLC30A1  | endometrial cancer   | 2 | 7  | 2 | 1 | 12 | 183.33 |
| SLC30A1  | head and neck cancer | 0 | 1  | 1 | 0 | 2  | 150    |
| SLC30A1  | liver cancer         | 1 | 5  | 2 | 2 | 10 | 150    |
| SLC37A2  | prostate cancer      | 9 | 2  | 0 | 0 | 11 | 281.82 |
| SLC37A2  | liver cancer         | 0 | 9  | 2 | 0 | 11 | 181.82 |
| SLC37A2  | endometrial cancer   | 0 | 10 | 1 | 1 | 12 | 175    |
| SLC37A2  | thyroid cancer       | 0 | 3  | 1 | 0 | 4  | 175    |
| SLC37A2  | colorectal cancer    | 0 | 7  | 3 | 0 | 10 | 170    |
| SLC37A2  | melanoma             | 1 | 5  | 2 | 1 | 9  | 166.67 |
| SLC37A2  | pancreatic cancer    | 0 | 5  | 5 | 0 | 10 | 150    |
| SLC38A1  | renal cancer         | 2 | 6  | 0 | 3 | 11 | 163.64 |
| SLC38A1  | liver cancer         | 4 | 3  | 1 | 4 | 12 | 158.33 |
| SLC38A1  | colorectal cancer    | 1 | 6  | 3 | 2 | 12 | 150    |
| SLC38A5  | carcinoid            | 0 | 2  | 1 | 0 | 3  | 166.67 |
| SLC39A10 | thyroid cancer       | 3 | 1  | 0 | 0 | 4  | 275    |
| SLC39A10 | breast cancer        | 7 | 5  | 0 | 0 | 12 | 258.33 |
| SLC39A10 | urothelial cancer    | 7 | 0  | 1 | 2 | 10 | 220    |
| SLC39A10 | pancreatic cancer    | 6 | 3  | 1 | 2 | 12 | 208.33 |
| SLC39A10 | lung cancer          | 5 | 4  | 0 | 3 | 12 | 191.67 |
| SLC39A10 | ovarian cancer       | 4 | 5  | 0 | 3 | 12 | 183.33 |
| SLC39A6  | breast cancer        | 3 | 7  | 2 | 0 | 12 | 208.33 |
| SLC39A6  | prostate cancer      | 1 | 8  | 2 | 0 | 11 | 190.91 |
| SLC39A6  | head and neck cancer | 1 | 1  | 2 | 0 | 4  | 175    |
| SLC39A6  | colorectal cancer    | 0 | 8  | 4 | 0 | 12 | 166.67 |
| SLC39A6  | testis cancer        | 1 | 5  | 3 | 1 | 10 | 160    |

|         |                      |   |    |   |   |    |        |
|---------|----------------------|---|----|---|---|----|--------|
| SLC43A3 | colorectal cancer    | 0 | 6  | 6 | 0 | 12 | 150    |
| SLC44A3 | head and neck cancer | 0 | 3  | 1 | 0 | 4  | 175    |
| SLC44A4 | prostate cancer      | 1 | 8  | 2 | 0 | 11 | 190.91 |
| SLC45A4 | pancreatic cancer    | 2 | 6  | 1 | 2 | 11 | 172.73 |
| SLC4A5  | prostate cancer      | 0 | 9  | 3 | 0 | 12 | 175    |
| SLC4A5  | breast cancer        | 0 | 9  | 1 | 1 | 11 | 172.73 |
| SLC4A5  | thyroid cancer       | 0 | 2  | 1 | 0 | 3  | 166.67 |
| SLC52A3 | head and neck cancer | 1 | 2  | 1 | 0 | 4  | 200    |
| SLC52A3 | colorectal cancer    | 0 | 8  | 3 | 1 | 12 | 158.33 |
| SLC6A2  | thyroid cancer       | 0 | 3  | 0 | 1 | 4  | 150    |
| SLC6A6  | prostate cancer      | 1 | 7  | 0 | 1 | 9  | 188.89 |
| SLC6A6  | colorectal cancer    | 0 | 7  | 2 | 0 | 9  | 177.78 |
| SLC6A9  | head and neck cancer | 0 | 3  | 0 | 0 | 3  | 200    |
| SLC6A9  | thyroid cancer       | 0 | 3  | 0 | 0 | 3  | 200    |
| SLC6A9  | colorectal cancer    | 2 | 6  | 3 | 0 | 11 | 190.91 |
| SLC6A9  | carcinoid            | 1 | 2  | 0 | 1 | 4  | 175    |
| SLC6A9  | melanoma             | 0 | 5  | 3 | 0 | 8  | 162.5  |
| SLC7A3  | urothelial cancer    | 6 | 4  | 0 | 1 | 11 | 236.36 |
| SLC7A3  | skin cancer          | 2 | 8  | 0 | 0 | 10 | 220    |
| SLC7A3  | pancreatic cancer    | 3 | 8  | 1 | 0 | 12 | 216.67 |
| SLC7A3  | breast cancer        | 2 | 9  | 1 | 0 | 12 | 208.33 |
| SLC7A3  | cervical cancer      | 1 | 10 | 1 | 0 | 12 | 200    |
| SLC7A3  | head and neck cancer | 1 | 2  | 1 | 0 | 4  | 200    |
| SLC8B1  | colorectal cancer    | 8 | 2  | 0 | 1 | 11 | 254.55 |
| SLC8B1  | thyroid cancer       | 2 | 2  | 0 | 0 | 4  | 250    |
| SLC8B1  | lymphoma             | 7 | 3  | 2 | 0 | 12 | 241.67 |
| SLC8B1  | head and neck cancer | 1 | 2  | 0 | 0 | 3  | 233.33 |
| SLC8B1  | cervical cancer      | 4 | 7  | 1 | 0 | 12 | 225    |
| SLC8B1  | testis cancer        | 4 | 6  | 0 | 1 | 11 | 218.18 |
| SLC8B1  | glioma               | 4 | 1  | 1 | 1 | 7  | 214.29 |
| SLC8B1  | breast cancer        | 3 | 4  | 3 | 0 | 10 | 200    |
| SLC8B1  | lung cancer          | 6 | 0  | 1 | 4 | 11 | 172.73 |
| SLC8B1  | stomach cancer       | 3 | 4  | 2 | 2 | 11 | 172.73 |
| SLC8B1  | skin cancer          | 3 | 3  | 2 | 2 | 10 | 170    |
| SLC8B1  | carcinoid            | 0 | 3  | 0 | 1 | 4  | 150    |
| SLC9A2  | liver cancer         | 2 | 6  | 3 | 1 | 12 | 175    |
| SLC9A2  | prostate cancer      | 2 | 3  | 4 | 1 | 10 | 160    |
| SLC9A2  | colorectal cancer    | 1 | 6  | 3 | 2 | 12 | 150    |
| SLC9A2  | testis cancer        | 0 | 7  | 4 | 1 | 12 | 150    |
| SLC9A2  | thyroid cancer       | 0 | 2  | 2 | 0 | 4  | 150    |

|               |                    |   |    |   |   |    |        |
|---------------|--------------------|---|----|---|---|----|--------|
| <b>SLC9A6</b> | glioma             | 0 | 7  | 4 | 1 | 12 | 150    |
| <b>SLC9A6</b> | thyroid cancer     | 0 | 3  | 0 | 1 | 4  | 150    |
| <b>SMO</b>    | prostate cancer    | 0 | 12 | 0 | 0 | 12 | 200    |
| <b>SMO</b>    | melanoma           | 1 | 9  | 2 | 0 | 12 | 191.67 |
| <b>SMO</b>    | thyroid cancer     | 0 | 3  | 1 | 0 | 4  | 175    |
| <b>SMO</b>    | renal cancer       | 0 | 8  | 4 | 0 | 12 | 166.67 |
| <b>SMO</b>    | carcinoid          | 0 | 3  | 0 | 1 | 4  | 150    |
| <b>SORCS1</b> | stomach cancer     | 4 | 6  | 0 | 1 | 11 | 218.18 |
| <b>SORCS1</b> | lymphoma           | 5 | 3  | 2 | 2 | 12 | 191.67 |
| <b>SORCS1</b> | thyroid cancer     | 1 | 2  | 0 | 1 | 4  | 175    |
| <b>SORCS1</b> | pancreatic cancer  | 2 | 6  | 2 | 2 | 12 | 166.67 |
| <b>SORCS1</b> | endometrial cancer | 3 | 4  | 2 | 3 | 12 | 158.33 |
| <b>SORCS1</b> | urothelial cancer  | 2 | 6  | 1 | 3 | 12 | 158.33 |
| <b>SORCS1</b> | skin cancer        | 1 | 5  | 5 | 1 | 12 | 150    |
| <b>SORCS1</b> | renal cancer       | 3 | 4  | 1 | 4 | 12 | 150    |
| <b>SORL1</b>  | thyroid cancer     | 0 | 3  | 0 | 0 | 3  | 200    |
| <b>SORL1</b>  | carcinoid          | 0 | 2  | 1 | 0 | 3  | 166.67 |
| <b>SORL1</b>  | breast cancer      | 0 | 6  | 3 | 1 | 10 | 150    |
| <b>SORT1</b>  | melanoma           | 5 | 5  | 0 | 1 | 11 | 227.27 |
| <b>SORT1</b>  | thyroid cancer     | 1 | 2  | 0 | 1 | 4  | 175    |
| <b>SORT1</b>  | glioma             | 3 | 3  | 2 | 2 | 10 | 170    |
| <b>SPINT2</b> | prostate cancer    | 6 | 6  | 0 | 0 | 12 | 250    |
| <b>SPINT2</b> | breast cancer      | 3 | 8  | 0 | 0 | 11 | 227.27 |
| <b>SPINT2</b> | pancreatic cancer  | 4 | 7  | 1 | 0 | 12 | 225    |
| <b>SPINT2</b> | colorectal cancer  | 2 | 10 | 0 | 0 | 12 | 216.67 |
| <b>SPINT2</b> | stomach cancer     | 1 | 11 | 0 | 0 | 12 | 208.33 |
| <b>SPINT2</b> | carcinoid          | 0 | 4  | 0 | 0 | 4  | 200    |
| <b>SPINT2</b> | endometrial cancer | 1 | 10 | 1 | 0 | 12 | 200    |
| <b>SPINT2</b> | ovarian cancer     | 1 | 10 | 1 | 0 | 12 | 200    |
| <b>SPINT2</b> | liver cancer       | 0 | 10 | 2 | 0 | 12 | 183.33 |
| <b>SPINT2</b> | testis cancer      | 2 | 6  | 4 | 0 | 12 | 183.33 |
| <b>SPINT2</b> | lung cancer        | 0 | 9  | 3 | 0 | 12 | 175    |
| <b>SPINT2</b> | urothelial cancer  | 0 | 9  | 3 | 0 | 12 | 175    |
| <b>SPINT2</b> | cervical cancer    | 0 | 8  | 4 | 0 | 12 | 166.67 |
| <b>SPINT2</b> | thyroid cancer     | 0 | 2  | 1 | 0 | 3  | 166.67 |
| <b>SSTR2</b>  | liver cancer       | 0 | 9  | 2 | 1 | 12 | 166.67 |
| <b>SSTR2</b>  | carcinoid          | 0 | 2  | 2 | 0 | 4  | 150    |
| <b>SSTR2</b>  | stomach cancer     | 1 | 6  | 3 | 2 | 12 | 150    |
| <b>SSTR2</b>  | thyroid cancer     | 0 | 2  | 2 | 0 | 4  | 150    |
| <b>STS</b>    | thyroid cancer     | 0 | 3  | 1 | 0 | 4  | 175    |

|        |                      |    |    |   |   |    |        |
|--------|----------------------|----|----|---|---|----|--------|
| STS    | renal cancer         | 0  | 7  | 5 | 0 | 12 | 158.33 |
| STS    | glioma               | 0  | 6  | 5 | 0 | 11 | 154.55 |
| STS    | pancreatic cancer    | 0  | 7  | 4 | 1 | 12 | 150    |
| SUSD4  | colorectal cancer    | 0  | 8  | 3 | 1 | 12 | 158.33 |
| SUSD4  | thyroid cancer       | 0  | 2  | 2 | 0 | 4  | 150    |
| SV2A   | carcinoid            | 4  | 0  | 0 | 0 | 4  | 300    |
| SV2A   | glioma               | 3  | 2  | 2 | 3 | 10 | 150    |
| SV2B   | carcinoid            | 1  | 1  | 1 | 1 | 4  | 150    |
| SYP    | carcinoid            | 0  | 4  | 0 | 0 | 4  | 200    |
| TAS1R3 | prostate cancer      | 0  | 8  | 3 | 0 | 11 | 172.73 |
| TECTA  | head and neck cancer | 1  | 1  | 1 | 1 | 4  | 150    |
| TGFA   | thyroid cancer       | 1  | 3  | 0 | 0 | 4  | 225    |
| TGFA   | pancreatic cancer    | 2  | 7  | 1 | 0 | 10 | 210    |
| TGFA   | liver cancer         | 2  | 9  | 0 | 1 | 12 | 200    |
| TGFA   | melanoma             | 2  | 8  | 0 | 1 | 11 | 200    |
| TGFA   | prostate cancer      | 0  | 11 | 0 | 0 | 11 | 200    |
| TGFA   | glioma               | 1  | 8  | 2 | 0 | 11 | 190.91 |
| TGFA   | renal cancer         | 1  | 7  | 3 | 1 | 12 | 166.67 |
| TGFA   | breast cancer        | 0  | 8  | 4 | 0 | 12 | 166.67 |
| TGFBRI | stomach cancer       | 1  | 8  | 0 | 3 | 12 | 158.33 |
| THBD   | skin cancer          | 5  | 3  | 1 | 3 | 12 | 183.33 |
| TLR3   | renal cancer         | 2  | 9  | 1 | 0 | 12 | 208.33 |
| TLR3   | thyroid cancer       | 0  | 3  | 1 | 0 | 4  | 175    |
| TLR3   | pancreatic cancer    | 0  | 7  | 3 | 1 | 11 | 154.55 |
| TMCO3  | breast cancer        | 10 | 1  | 0 | 0 | 11 | 290.91 |
| TMCO3  | prostate cancer      | 10 | 1  | 0 | 0 | 11 | 290.91 |
| TMCO3  | endometrial cancer   | 10 | 2  | 0 | 0 | 12 | 283.33 |
| TMCO3  | pancreatic cancer    | 8  | 2  | 1 | 0 | 11 | 263.64 |
| TMCO3  | colorectal cancer    | 7  | 5  | 0 | 0 | 12 | 258.33 |
| TMCO3  | stomach cancer       | 7  | 2  | 2 | 0 | 11 | 245.45 |
| TMCO3  | carcinoid            | 1  | 2  | 0 | 0 | 3  | 233.33 |
| TMCO3  | ovarian cancer       | 5  | 5  | 2 | 0 | 12 | 225    |
| TMCO3  | skin cancer          | 4  | 3  | 2 | 1 | 10 | 200    |
| TMCO3  | glioma               | 2  | 8  | 2 | 0 | 12 | 200    |
| TMCO3  | head and neck cancer | 1  | 2  | 1 | 0 | 4  | 200    |
| TMCO3  | cervical cancer      | 3  | 5  | 3 | 1 | 12 | 183.33 |
| TMCO3  | melanoma             | 1  | 8  | 1 | 1 | 11 | 181.82 |
| TMCO3  | lung cancer          | 5  | 2  | 1 | 3 | 11 | 181.82 |
| TMCO3  | thyroid cancer       | 1  | 1  | 0 | 1 | 3  | 166.67 |
| TMCO3  | urothelial cancer    | 2  | 6  | 0 | 3 | 11 | 163.64 |

|                  |                      |   |    |   |   |    |        |
|------------------|----------------------|---|----|---|---|----|--------|
| <b>TMCO3</b>     | liver cancer         | 4 | 2  | 1 | 4 | 11 | 154.55 |
| <b>TMCO3</b>     | renal cancer         | 3 | 3  | 2 | 3 | 11 | 154.55 |
| <b>TMED7</b>     | endometrial cancer   | 4 | 6  | 1 | 0 | 11 | 227.27 |
| <b>TMED7</b>     | carcinoid            | 1 | 2  | 1 | 0 | 4  | 200    |
| <b>TMED7</b>     | thyroid cancer       | 0 | 4  | 0 | 0 | 4  | 200    |
| <b>TMED7</b>     | liver cancer         | 1 | 8  | 3 | 0 | 12 | 183.33 |
| <b>TMED7</b>     | head and neck cancer | 0 | 3  | 1 | 0 | 4  | 175    |
| <b>TMED7</b>     | prostate cancer      | 0 | 7  | 5 | 0 | 12 | 158.33 |
| <b>TMED7</b>     | breast cancer        | 0 | 6  | 5 | 0 | 11 | 154.55 |
| <b>TMEFF2</b>    | melanoma             | 1 | 8  | 2 | 1 | 12 | 175    |
| <b>TMEFF2</b>    | thyroid cancer       | 0 | 3  | 1 | 0 | 4  | 175    |
| <b>TMEFF2</b>    | prostate cancer      | 1 | 6  | 4 | 1 | 12 | 158.33 |
| <b>TMEM108</b>   | head and neck cancer | 0 | 4  | 0 | 0 | 4  | 200    |
| <b>TMEM108</b>   | colorectal cancer    | 0 | 6  | 4 | 0 | 10 | 160    |
| <b>TMEM154</b>   | colorectal cancer    | 3 | 4  | 3 | 1 | 11 | 181.82 |
| <b>TMEM161A</b>  | carcinoid            | 2 | 1  | 1 | 0 | 4  | 225    |
| <b>TMEM204</b>   | thyroid cancer       | 2 | 1  | 0 | 1 | 4  | 200    |
| <b>TMEM25</b>    | liver cancer         | 0 | 10 | 2 | 0 | 12 | 183.33 |
| <b>TMEM25</b>    | ovarian cancer       | 0 | 6  | 5 | 0 | 11 | 154.55 |
| <b>TMEM30A</b>   | melanoma             | 7 | 4  | 0 | 0 | 11 | 263.64 |
| <b>TMEM30A</b>   | prostate cancer      | 0 | 10 | 0 | 0 | 10 | 200    |
| <b>TNFRSF10C</b> | thyroid cancer       | 0 | 2  | 2 | 0 | 4  | 150    |
| <b>TNFRSF13B</b> | thyroid cancer       | 3 | 1  | 0 | 0 | 4  | 275    |
| <b>TNFRSF13B</b> | colorectal cancer    | 8 | 4  | 0 | 0 | 12 | 266.67 |
| <b>TNFRSF13B</b> | lymphoma             | 7 | 2  | 0 | 2 | 11 | 227.27 |
| <b>TNFRSF13B</b> | liver cancer         | 4 | 7  | 1 | 0 | 12 | 225    |
| <b>TNFRSF13B</b> | testis cancer        | 3 | 7  | 2 | 0 | 12 | 208.33 |
| <b>TNFRSF13B</b> | carcinoid            | 1 | 2  | 1 | 0 | 4  | 200    |
| <b>TNFRSF13B</b> | breast cancer        | 0 | 11 | 1 | 0 | 12 | 191.67 |
| <b>TNFRSF13B</b> | ovarian cancer       | 0 | 9  | 1 | 2 | 12 | 158.33 |
| <b>TNFRSF13B</b> | stomach cancer       | 1 | 4  | 3 | 1 | 9  | 155.56 |
| <b>TNFRSF13B</b> | melanoma             | 2 | 4  | 3 | 2 | 11 | 154.55 |
| <b>TNFRSF13B</b> | head and neck cancer | 1 | 1  | 1 | 1 | 4  | 150    |
| <b>TNFRSF18</b>  | lymphoma             | 3 | 5  | 1 | 3 | 12 | 166.67 |
| <b>TNFRSF1A</b>  | cervical cancer      | 1 | 7  | 4 | 0 | 12 | 175    |
| <b>TNFRSF1A</b>  | urothelial cancer    | 0 | 9  | 3 | 0 | 12 | 175    |
| <b>TNFRSF1A</b>  | breast cancer        | 2 | 6  | 2 | 2 | 12 | 166.67 |
| <b>TNFRSF1A</b>  | ovarian cancer       | 0 | 7  | 4 | 0 | 11 | 163.64 |
| <b>TNFRSF1A</b>  | testis cancer        | 0 | 7  | 4 | 0 | 11 | 163.64 |
| <b>TNFRSF1A</b>  | colorectal cancer    | 1 | 5  | 6 | 0 | 12 | 158.33 |



|                 |                      |   |    |   |   |    |        |
|-----------------|----------------------|---|----|---|---|----|--------|
| <b>TNFRSF1A</b> | stomach cancer       | 2 | 4  | 5 | 1 | 12 | 158.33 |
| <b>TNFRSF1B</b> | renal cancer         | 4 | 6  | 2 | 0 | 12 | 216.67 |
| <b>TNFRSF1B</b> | testis cancer        | 2 | 8  | 2 | 0 | 12 | 200    |
| <b>TNFRSF1B</b> | liver cancer         | 1 | 8  | 2 | 0 | 11 | 190.91 |
| <b>TNFRSF1B</b> | breast cancer        | 0 | 10 | 2 | 0 | 12 | 183.33 |
| <b>TNFRSF1B</b> | prostate cancer      | 0 | 9  | 3 | 0 | 12 | 175    |
| <b>TNFRSF1B</b> | thyroid cancer       | 1 | 1  | 2 | 0 | 4  | 175    |
| <b>TNFRSF1B</b> | colorectal cancer    | 0 | 8  | 4 | 0 | 12 | 166.67 |
| <b>TNFRSF1B</b> | urothelial cancer    | 0 | 8  | 4 | 0 | 12 | 166.67 |
| <b>TNFRSF1B</b> | stomach cancer       | 0 | 7  | 4 | 0 | 11 | 163.64 |
| <b>TNFRSF1B</b> | pancreatic cancer    | 0 | 7  | 5 | 0 | 12 | 158.33 |
| <b>TNFRSF1B</b> | melanoma             | 0 | 8  | 3 | 1 | 12 | 158.33 |
| <b>TNFRSF1B</b> | carcinoid            | 0 | 2  | 2 | 0 | 4  | 150    |
| <b>TNFRSF1B</b> | head and neck cancer | 0 | 2  | 2 | 0 | 4  | 150    |
| <b>TNFRSF21</b> | breast cancer        | 0 | 10 | 2 | 0 | 12 | 183.33 |
| <b>TNFRSF21</b> | prostate cancer      | 0 | 8  | 3 | 1 | 12 | 158.33 |
| <b>TNFRSF21</b> | colorectal cancer    | 0 | 6  | 5 | 0 | 11 | 154.55 |
| <b>TNFRSF21</b> | head and neck cancer | 0 | 2  | 2 | 0 | 4  | 150    |
| <b>TNFSF13B</b> | head and neck cancer | 1 | 3  | 0 | 0 | 4  | 225    |
| <b>TNFSF13B</b> | carcinoid            | 0 | 4  | 0 | 0 | 4  | 200    |
| <b>TNFSF13B</b> | thyroid cancer       | 0 | 4  | 0 | 0 | 4  | 200    |
| <b>TNFSF13B</b> | colorectal cancer    | 0 | 11 | 1 | 0 | 12 | 191.67 |
| <b>TNFSF13B</b> | liver cancer         | 0 | 9  | 2 | 0 | 11 | 181.82 |
| <b>TNFSF13B</b> | testis cancer        | 0 | 9  | 2 | 0 | 11 | 181.82 |
| <b>TNFSF13B</b> | breast cancer        | 1 | 7  | 3 | 0 | 11 | 181.82 |
| <b>TNFSF13B</b> | pancreatic cancer    | 0 | 9  | 3 | 0 | 12 | 175    |
| <b>TNFSF13B</b> | stomach cancer       | 0 | 8  | 3 | 0 | 11 | 172.73 |
| <b>TNFSF13B</b> | urothelial cancer    | 0 | 7  | 3 | 0 | 10 | 170    |
| <b>TNFSF13B</b> | lymphoma             | 0 | 9  | 2 | 1 | 12 | 166.67 |
| <b>TNFSF13B</b> | renal cancer         | 0 | 8  | 4 | 0 | 12 | 166.67 |
| <b>TNFSF13B</b> | ovarian cancer       | 0 | 7  | 4 | 0 | 11 | 163.64 |
| <b>TNFSF13B</b> | endometrial cancer   | 0 | 6  | 5 | 0 | 11 | 154.55 |
| <b>TNFSF13B</b> | prostate cancer      | 0 | 6  | 5 | 0 | 11 | 154.55 |
| <b>TPO</b>      | thyroid cancer       | 1 | 2  | 0 | 1 | 4  | 175    |
| <b>TRPV6</b>    | melanoma             | 0 | 9  | 0 | 3 | 12 | 150    |
| <b>TSPAN13</b>  | renal cancer         | 1 | 10 | 1 | 0 | 12 | 200    |
| <b>TSPAN13</b>  | urothelial cancer    | 0 | 6  | 5 | 0 | 11 | 154.55 |
| <b>TSPAN13</b>  | carcinoid            | 0 | 2  | 2 | 0 | 4  | 150    |
| <b>TSPAN15</b>  | pancreatic cancer    | 3 | 6  | 0 | 3 | 12 | 175    |
| <b>TSPAN2</b>   | glioma               | 8 | 0  | 1 | 3 | 12 | 208.33 |

|                |                      |    |    |   |   |    |        |
|----------------|----------------------|----|----|---|---|----|--------|
| <b>TSPAN3</b>  | colorectal cancer    | 6  | 4  | 1 | 1 | 12 | 225    |
| <b>TSPAN3</b>  | glioma               | 3  | 8  | 1 | 0 | 12 | 216.67 |
| <b>TSPAN3</b>  | pancreatic cancer    | 3  | 6  | 2 | 0 | 11 | 209.09 |
| <b>TSPAN3</b>  | thyroid cancer       | 0  | 4  | 0 | 0 | 4  | 200    |
| <b>TSPAN31</b> | melanoma             | 2  | 6  | 3 | 0 | 11 | 190.91 |
| <b>TSPAN9</b>  | breast cancer        | 0  | 6  | 3 | 0 | 9  | 166.67 |
| <b>TSPAN9</b>  | thyroid cancer       | 0  | 2  | 2 | 0 | 4  | 150    |
| <b>TXNDC15</b> | thyroid cancer       | 0  | 4  | 0 | 0 | 4  | 200    |
| <b>TXNDC15</b> | breast cancer        | 0  | 10 | 2 | 0 | 12 | 183.33 |
| <b>TXNDC15</b> | testis cancer        | 0  | 8  | 2 | 0 | 10 | 180    |
| <b>TXNDC15</b> | prostate cancer      | 0  | 9  | 2 | 1 | 12 | 166.67 |
| <b>TXNDC15</b> | head and neck cancer | 0  | 2  | 2 | 0 | 4  | 150    |
| <b>TXNDC15</b> | melanoma             | 0  | 8  | 2 | 2 | 12 | 150    |
| <b>UBAC2</b>   | colorectal cancer    | 1  | 8  | 2 | 1 | 12 | 175    |
| <b>UGT8</b>    | glioma               | 5  | 5  | 0 | 0 | 10 | 250    |
| <b>UGT8</b>    | stomach cancer       | 2  | 7  | 2 | 0 | 11 | 200    |
| <b>UGT8</b>    | colorectal cancer    | 1  | 8  | 2 | 1 | 12 | 175    |
| <b>UGT8</b>    | testis cancer        | 0  | 8  | 3 | 0 | 11 | 172.73 |
| <b>UGT8</b>    | thyroid cancer       | 1  | 1  | 0 | 1 | 3  | 166.67 |
| <b>UPK1A</b>   | thyroid cancer       | 2  | 1  | 0 | 0 | 3  | 266.67 |
| <b>UPK1B</b>   | urothelial cancer    | 5  | 1  | 3 | 2 | 11 | 181.82 |
| <b>UPK1B</b>   | endometrial cancer   | 2  | 4  | 4 | 2 | 12 | 150    |
| <b>UPK3B</b>   | renal cancer         | 10 | 2  | 0 | 0 | 12 | 283.33 |
| <b>UPK3B</b>   | urothelial cancer    | 3  | 8  | 0 | 1 | 12 | 208.33 |
| <b>UPK3B</b>   | head and neck cancer | 0  | 3  | 0 | 0 | 3  | 200    |
| <b>UPK3B</b>   | endometrial cancer   | 1  | 6  | 3 | 0 | 10 | 180    |
| <b>UPK3B</b>   | ovarian cancer       | 2  | 5  | 4 | 1 | 12 | 166.67 |
| <b>UPK3B</b>   | testis cancer        | 0  | 7  | 2 | 1 | 10 | 160    |
| <b>UPK3B</b>   | melanoma             | 3  | 2  | 6 | 1 | 12 | 158.33 |
| <b>UPK3B</b>   | colorectal cancer    | 2  | 3  | 5 | 1 | 11 | 154.55 |
| <b>UPK3B</b>   | carcinoid            | 1  | 1  | 1 | 1 | 4  | 150    |
| <b>VLDLR</b>   | liver cancer         | 0  | 9  | 2 | 1 | 12 | 166.67 |
| <b>VSTM4</b>   | carcinoid            | 1  | 3  | 0 | 0 | 4  | 225    |
| <b>VSTM4</b>   | urothelial cancer    | 1  | 9  | 0 | 0 | 10 | 210    |
| <b>VSTM4</b>   | ovarian cancer       | 1  | 10 | 0 | 0 | 11 | 209.09 |
| <b>VSTM4</b>   | glioma               | 1  | 11 | 0 | 0 | 12 | 208.33 |
| <b>VSTM4</b>   | breast cancer        | 0  | 11 | 0 | 0 | 11 | 200    |
| <b>VSTM4</b>   | cervical cancer      | 0  | 11 | 0 | 0 | 11 | 200    |
| <b>VSTM4</b>   | head and neck cancer | 0  | 4  | 0 | 0 | 4  | 200    |
| <b>VSTM4</b>   | melanoma             | 1  | 10 | 1 | 0 | 12 | 200    |

|                 |                      |   |    |   |   |    |        |
|-----------------|----------------------|---|----|---|---|----|--------|
| <b>VSTM4</b>    | pancreatic cancer    | 0 | 9  | 0 | 0 | 9  | 200    |
| <b>VSTM4</b>    | skin cancer          | 0 | 12 | 0 | 0 | 12 | 200    |
| <b>VSTM4</b>    | testis cancer        | 0 | 11 | 0 | 0 | 11 | 200    |
| <b>VSTM4</b>    | thyroid cancer       | 0 | 4  | 0 | 0 | 4  | 200    |
| <b>VSTM4</b>    | lymphoma             | 0 | 11 | 1 | 0 | 12 | 191.67 |
| <b>VSTM4</b>    | colorectal cancer    | 0 | 10 | 1 | 0 | 11 | 190.91 |
| <b>VSTM4</b>    | stomach cancer       | 0 | 9  | 1 | 0 | 10 | 190    |
| <b>VSTM4</b>    | lung cancer          | 0 | 9  | 2 | 0 | 11 | 181.82 |
| <b>VSTM4</b>    | endometrial cancer   | 0 | 10 | 1 | 1 | 12 | 175    |
| <b>VSTM4</b>    | renal cancer         | 1 | 7  | 4 | 0 | 12 | 175    |
| <b>VSTM4</b>    | liver cancer         | 0 | 7  | 4 | 0 | 11 | 163.64 |
| <b>ZDHHC11B</b> | head and neck cancer | 0 | 1  | 1 | 0 | 2  | 150    |

| <b>Supplementary Table S3.</b> Validation status for potential ADC targets (only green rows contain validated targets) |               |                                                 |                                                                      |                                       |
|------------------------------------------------------------------------------------------------------------------------|---------------|-------------------------------------------------|----------------------------------------------------------------------|---------------------------------------|
| Gene name                                                                                                              | Antibody Name | RNA consistency                                 | Literature conformity                                                | Verification of membrane localization |
| ABCA2                                                                                                                  | HPA042886     | Mainly consistent with RNA expression data.     | Partly consistent with gene/protein characterization data.           | No                                    |
| ABCB1                                                                                                                  | CAB001716     | Mainly consistent with RNA expression data.     | Partly consistent with extensive gene/protein characterization data. | Yes                                   |
| ABCB9                                                                                                                  | HPA035114     | Mainly not consistent with RNA expression data. | Partly consistent with gene/protein characterization data.           |                                       |
| ABCC10                                                                                                                 | HPA041607     | Mainly not consistent with RNA expression data. | Partly consistent with gene/protein characterization data.           |                                       |
| ABCC11                                                                                                                 | HPA031981     | Not consistent with RNA expression data.        | Partly consistent with gene/protein characterization data.           |                                       |
| ACVR1B                                                                                                                 | HPA063761     | Mainly not consistent with RNA expression data. | Partly consistent with extensive gene/protein characterization data. |                                       |
| ADAM15                                                                                                                 | HPA011633     | Mainly not consistent with RNA expression data. | Partly consistent with extensive gene/protein characterization data. |                                       |
| ADAM17                                                                                                                 | HPA010738     | Mainly consistent with RNA expression data.     | Partly consistent with extensive gene/protein characterization data. | No                                    |
| ADAM23                                                                                                                 | CAB033276     | Mainly consistent with RNA expression data.     | Partly consistent with gene/protein characterization data.           | No                                    |
| ADAM33                                                                                                                 | HPA067152     | Mainly not consistent with RNA expression data. | Partly consistent with gene/protein characterization data.           |                                       |
| ADAM8                                                                                                                  | HPA064637     | Mainly not consistent with RNA expression data. | Consistent with gene/protein characterization data.                  |                                       |
| ADCY2                                                                                                                  | HPA038015     | Mainly consistent with RNA expression data.     | Partly consistent with gene/protein characterization data.           | No                                    |
| ADCY3                                                                                                                  | CAB010223     | Mainly not consistent with RNA expression data. | Partly consistent with gene/protein characterization data.           |                                       |
| ADCY6                                                                                                                  | CAB018365     | Mainly not consistent with RNA expression data. | Partly consistent with extensive gene/protein characterization data. |                                       |
| ADCY9                                                                                                                  | HPA041328     | Mainly consistent with RNA expression data.     | Partly consistent with gene/protein characterization data.           | No                                    |
| ALK                                                                                                                    | HPA010694     | Mainly not consistent with RNA expression data. | Partly consistent with extensive gene/protein characterization data. |                                       |
| ALPL                                                                                                                   | HPA007105     | Mainly not consistent with RNA expression data. | Partly consistent with extensive gene/protein characterization data. |                                       |
| ANO1                                                                                                                   | HPA032148     | Mainly consistent with RNA expression data.     | Consistent with extensive gene/protein characterization data.        | No                                    |
| ANO7                                                                                                                   | HPA078464     | Consistent with RNA expression data.            | Consistent with extensive gene/protein characterization data.        | Yes                                   |
| ANO9                                                                                                                   | HPA039948     | Mainly not consistent with RNA expression data. | No available gene/protein characterization data.                     |                                       |
| AQP5                                                                                                                   | HPA065008     | Consistent with RNA expression data.            | Consistent with extensive gene/protein characterization data.        | Yes                                   |
| AQP8                                                                                                                   | HPA046259     | Mainly consistent with RNA expression data.     | Partly consistent with gene/protein characterization data.           | No                                    |
| ATP13A1                                                                                                                | HPA049717     | Mainly not consistent with RNA expression data. | No available gene/protein characterization data.                     |                                       |
| ATP1B3                                                                                                                 | CAB020697     | Mainly consistent with RNA expression data.     | Partly consistent with extensive gene/protein characterization data. | No                                    |
| ATP2B2                                                                                                                 | CAB005606     | Mainly consistent with RNA expression data.     | Consistent with extensive gene/protein characterization data.        | Yes                                   |
| ATRN                                                                                                                   | HPA008853     | Mainly not consistent with RNA expression data. | Partly consistent with extensive gene/protein characterization data. |                                       |
| BACE1                                                                                                                  | CAB016358     | Mainly not consistent with RNA expression data. | Partly consistent with extensive gene/protein characterization data. |                                       |
| BACE2                                                                                                                  | HPA035416     | Mainly not consistent with RNA expression data. | Partly consistent with extensive gene/protein characterization data. |                                       |
| BAMBI                                                                                                                  | HPA010866     | Mainly not consistent with RNA expression data. | Partly consistent with gene/protein characterization data.           |                                       |
| C11orf24                                                                                                               | HPA012748     | Mainly not consistent with RNA expression data. | Partly consistent with gene/protein characterization data.           |                                       |
| CALCR                                                                                                                  | HPA061428     | Mainly consistent with RNA expression data.     | Consistent with extensive gene/protein characterization data.        | No                                    |

|               |           |                                                 |                                                                      |     |
|---------------|-----------|-------------------------------------------------|----------------------------------------------------------------------|-----|
| <b>CCR2</b>   | CAB003793 | Mainly not consistent with RNA expression data. | Partly consistent with extensive gene/protein characterization data. |     |
| <b>CCR3</b>   | CAB003795 | Mainly not consistent with RNA expression data. | Partly consistent with extensive gene/protein characterization data. |     |
| <b>CCR9</b>   | CAB006839 | Mainly not consistent with RNA expression data. | Partly consistent with extensive gene/protein characterization data. |     |
| <b>CD101</b>  | HPA057763 | Mainly not consistent with RNA expression data. | Partly consistent with extensive gene/protein characterization data. |     |
| <b>CD19</b>   | CAB016110 | Mainly consistent with RNA expression data.     | Consistent with extensive gene/protein characterization data.        | Yes |
| <b>CD1B</b>   | HPA021824 | Mainly not consistent with RNA expression data. | Partly consistent with extensive gene/protein characterization data. |     |
| <b>CD276</b>  | HPA009285 | Mainly consistent with RNA expression data.     | Partly consistent with extensive gene/protein characterization data. | Yes |
| <b>CD33</b>   | HPA035832 | Mainly not consistent with RNA expression data. | Partly consistent with extensive gene/protein characterization data. |     |
| <b>CD37</b>   | CAB002492 | Consistent with RNA expression data.            | Consistent with extensive gene/protein characterization data.        | No  |
| <b>CD3D</b>   | CAB013055 | Mainly consistent with RNA expression data.     | Consistent with extensive gene/protein characterization data.        | No  |
| <b>CD3G</b>   | CAB017520 | Mainly consistent with RNA expression data.     | Partly consistent with extensive gene/protein characterization data. | No  |
| <b>CD47</b>   | HPA044659 | Mainly not consistent with RNA expression data. | Partly consistent with extensive gene/protein characterization data. |     |
| <b>CD53</b>   | HPA047216 | Mainly consistent with RNA expression data.     | Partly consistent with extensive gene/protein characterization data. | No  |
| <b>CD63</b>   | HPA010088 | Mainly consistent with RNA expression data.     | Consistent with extensive gene/protein characterization data.        | No  |
| <b>CD74</b>   | CAB002506 | Mainly consistent with RNA expression data.     | Consistent with extensive gene/protein characterization data.        | No  |
| <b>CD79A</b>  | CAB000019 | Consistent with RNA expression data.            | Consistent with extensive gene/protein characterization data.        | No  |
| <b>CD79B</b>  | HPA009178 | Mainly consistent with RNA expression data.     | Consistent with extensive gene/protein characterization data.        | Yes |
| <b>CD83</b>   | CAB002509 | Mainly consistent with RNA expression data.     | Consistent with extensive gene/protein characterization data.        | No  |
| <b>CD86</b>   | CAB004319 | Mainly consistent with RNA expression data.     | Consistent with extensive gene/protein characterization data.        | No  |
| <b>CDCP1</b>  | HPA010979 | Mainly consistent with RNA expression data.     | Partly consistent with extensive gene/protein characterization data. | Yes |
| <b>CDH11</b>  | CAB013072 | Mainly consistent with RNA expression data.     | Consistent with extensive gene/protein characterization data.        | No  |
| <b>CDH18</b>  | HPA014416 | Mainly consistent with RNA expression data.     | Partly consistent with gene/protein characterization data.           | No  |
| <b>CDH20</b>  | HPA015490 | Not consistent with RNA expression data.        | No available gene/protein characterization data.                     |     |
| <b>CDH5</b>   | CAB028366 | Mainly not consistent with RNA expression data. | Partly consistent with gene/protein characterization data.           |     |
| <b>CDH8</b>   | HPA014908 | Mainly not consistent with RNA expression data. | Partly consistent with extensive gene/protein characterization data. |     |
| <b>CELSR3</b> | HPA062866 | Mainly not consistent with RNA expression data. | Partly consistent with gene/protein characterization data.           |     |
| <b>CHPT1</b>  | HPA067643 | Mainly not consistent with RNA expression data. | Partly consistent with extensive gene/protein characterization data. |     |
| <b>CHRNA7</b> | HPA029422 | Mainly consistent with RNA expression data.     | Partly consistent with extensive gene/protein characterization data. | No  |
| <b>CHRNA7</b> | HPA005822 | Mainly not consistent with RNA expression data. | Partly consistent with extensive gene/protein characterization data. |     |
| <b>CLCNKB</b> | HPA057717 | Mainly consistent with RNA expression data.     | Partly consistent with gene/protein characterization data.           | No  |
| <b>CLRN1</b>  | HPA054636 | Not consistent with RNA expression data.        | Partly consistent with gene/protein characterization data.           |     |
| <b>CMKLR1</b> | HPA047865 | Mainly not consistent with RNA expression data. | Not consistent with gene/protein characterization data.              |     |
| <b>CNR1</b>   | HPA069945 | Mainly consistent with RNA expression data.     | Partly consistent with gene/protein characterization data.           | Yes |

|          |           |                                                            |                                                                      |     |
|----------|-----------|------------------------------------------------------------|----------------------------------------------------------------------|-----|
| CNTN6    | HPA016645 | Not consistent with RNA expression data.                   | Partly consistent with gene/protein characterization data.           |     |
| CRIM1    | HPA000556 | Mainly consistent with RNA expression data.                | Partly consistent with gene/protein characterization data.           | No  |
| CSF1R    | CAB008970 | Mainly not consistent with RNA expression data.            | Partly consistent with extensive gene/protein characterization data. |     |
| CSPG5    | HPA071779 | Consistent with RNA expression data.                       | Consistent with extensive gene/protein characterization data.        | No  |
| CXCR5    | HPA042432 | Mainly consistent with RNA expression data.                | Partly consistent with extensive gene/protein characterization data. | No  |
| DCBLD2   | HPA016909 | Mainly consistent with RNA expression data.                | Partly consistent with gene/protein characterization data.           | No  |
| DSCAM    | HPA019324 | Consistent with RNA expression data.                       | Consistent with extensive gene/protein characterization data.        | No  |
| DUOX1    | HPA041578 | Mainly not consistent with RNA expression data.            | Partly consistent with gene/protein characterization data.           |     |
| EDNRA    | CAB018957 | Mainly not consistent with RNA expression data.            | Partly consistent with extensive gene/protein characterization data. |     |
| EDNRB    | HPA027546 | Mainly consistent with RNA expression data.                | Partly consistent with extensive gene/protein characterization data. | No  |
| EFNA3    | CAB010494 | Mainly not consistent with RNA expression data.            | Partly consistent with gene/protein characterization data.           |     |
| EFNA4    | CAB021350 | No internal RNA expression data available for correlation. | Consistent with extensive gene/protein characterization data.        |     |
| ENPP5    | HPA016902 | Mainly consistent with RNA expression data.                | Partly consistent with gene/protein characterization data.           | No  |
| EPHA1    | CAB026144 | Mainly not consistent with RNA expression data.            | Partly consistent with extensive gene/protein characterization data. |     |
| EPHA3    | CAB010462 | Mainly not consistent with RNA expression data.            | Partly consistent with extensive gene/protein characterization data. |     |
| EPHA4    | CAB028368 | Mainly consistent with RNA expression data.                | Partly consistent with extensive gene/protein characterization data. | No  |
| ERBB2    | CAB020416 | Mainly consistent with RNA expression data.                | Consistent with extensive gene/protein characterization data.        | Yes |
| ERBB4    | HPA012016 | Mainly consistent with RNA expression data.                | Partly consistent with extensive gene/protein characterization data. | No  |
| ERMP1    | HPA055582 | Mainly not consistent with RNA expression data.            | No available gene/protein characterization data.                     |     |
| ESAM     | HPA056293 | Mainly not consistent with RNA expression data.            | Partly consistent with gene/protein characterization data.           |     |
| FAM171A1 | HPA051345 | Mainly consistent with RNA expression data.                | No available gene/protein characterization data.                     |     |
| FAM171B  | HPA010639 | Mainly not consistent with RNA expression data.            | No available gene/protein characterization data.                     |     |
| FCAR     | HPA014050 | Mainly consistent with RNA expression data.                | Consistent with extensive gene/protein characterization data.        | No  |
| FFAR3    | HPA044681 | Mainly not consistent with RNA expression data.            | Partly consistent with extensive gene/protein characterization data. |     |
| FGFR4    | HPA028251 | Mainly not consistent with RNA expression data.            | Partly consistent with extensive gene/protein characterization data. |     |
| FGFRL1   | CAB026019 | Mainly not consistent with RNA expression data.            | Partly consistent with extensive gene/protein characterization data. |     |
| FLRT1    | HPA054589 | Mainly not consistent with RNA expression data.            | Partly consistent with gene/protein characterization data.           |     |
| FLT1     | HPA011740 | Mainly consistent with RNA expression data.                | Consistent with extensive gene/protein characterization data.        | No  |
| FOLH1    | CAB001451 | Consistent with RNA expression data.                       | Consistent with extensive gene/protein characterization data.        | No  |
| FRRS1    | HPA017883 | Mainly consistent with RNA expression data.                | No available gene/protein characterization data.                     |     |
| GABBR1   | HPA050483 | Mainly not consistent with RNA expression data.            | Partly consistent with extensive gene/protein characterization data. |     |
| GABRB1   | HPA051297 | Not consistent with RNA expression data.                   | Partly consistent with gene/protein characterization data.           |     |
| GALR2    | HPA044513 | Mainly not consistent with RNA expression data.            | Partly consistent with extensive gene/protein characterization data. |     |
| GIPR     | CAB022710 | Mainly not consistent with RNA expression data.            | Partly consistent with gene/protein characterization data.           |     |

|                |           |                                                 |                                                                      |     |
|----------------|-----------|-------------------------------------------------|----------------------------------------------------------------------|-----|
| <b>GLRA4</b>   | HPA044759 | Not consistent with RNA expression data.        | No available gene/protein characterization data.                     |     |
| <b>GLRB</b>    | HPA052363 | Mainly not consistent with RNA expression data. | Partly consistent with extensive gene/protein characterization data. |     |
| <b>GP6</b>     | HPA066482 | Mainly not consistent with RNA expression data. | Partly consistent with extensive gene/protein characterization data. |     |
| <b>GPBAR1</b>  | HPA062890 | Mainly consistent with RNA expression data.     | Consistent with extensive gene/protein characterization data.        | Yes |
| <b>GPC1</b>    | HPA030571 | Mainly consistent with RNA expression data.     | Consistent with gene/protein characterization data.                  | No  |
| <b>GPM6B</b>   | HPA002913 | Mainly not consistent with RNA expression data. | Consistent with extensive gene/protein characterization data.        |     |
| <b>GPR143</b>  | HPA003648 | Mainly consistent with RNA expression data.     | Partly consistent with extensive gene/protein characterization data. | No  |
| <b>GPR153</b>  | HPA007159 | Mainly consistent with RNA expression data.     | No available gene/protein characterization data.                     |     |
| <b>GPR34</b>   | CAB025490 | Mainly consistent with RNA expression data.     | No available gene/protein characterization data.                     |     |
| <b>GPR4</b>    | HPA014278 | Mainly not consistent with RNA expression data. | Partly consistent with extensive gene/protein characterization data. |     |
| <b>GPR65</b>   | HPA072624 | Mainly consistent with RNA expression data.     | Consistent with extensive gene/protein characterization data.        | No  |
| <b>GPR82</b>   | HPA035914 | Mainly not consistent with RNA expression data. | Partly consistent with gene/protein characterization data.           |     |
| <b>GPRC5D</b>  | HPA071909 | Mainly not consistent with RNA expression data. | Consistent with gene/protein characterization data.                  |     |
| <b>GRAMD1B</b> | HPA008557 | Mainly not consistent with RNA expression data. | No available gene/protein characterization data.                     |     |
| <b>GRIN1</b>   | HPA067773 | Mainly consistent with RNA expression data.     | Consistent with extensive gene/protein characterization data.        | No  |
| <b>GRM2</b>    | HPA065166 | Mainly not consistent with RNA expression data. | Partly consistent with extensive gene/protein characterization data. |     |
| <b>GRM6</b>    | HPA014511 | Mainly consistent with RNA expression data.     | Partly consistent with extensive gene/protein characterization data. | No  |
| <b>GSG1L</b>   | HPA014479 | Mainly consistent with RNA expression data.     | Consistent with gene/protein characterization data.                  | No  |
| <b>GYPC</b>    | HPA008965 | Mainly consistent with RNA expression data.     | Consistent with extensive gene/protein characterization data.        | No  |
| <b>HAVCR1</b>  | CAB075697 | Mainly not consistent with RNA expression data. | Partly consistent with extensive gene/protein characterization data. |     |
| <b>HCRTR1</b>  | HPA014018 | Mainly not consistent with RNA expression data. | Consistent with extensive gene/protein characterization data.        |     |
| <b>HEG1</b>    | HPA011559 | Mainly not consistent with RNA expression data. | No available gene/protein characterization data.                     |     |
| <b>HEPACAM</b> | CAB025486 | Consistent with RNA expression data.            | Consistent with extensive gene/protein characterization data.        | No  |
| <b>HEPH</b>    | HPA005824 | Mainly not consistent with RNA expression data. | Partly consistent with gene/protein characterization data.           |     |
| <b>HLA-DMB</b> | HPA012298 | Mainly not consistent with RNA expression data. | Consistent with extensive gene/protein characterization data.        |     |
| <b>HLA-DOB</b> | HPA013846 | Mainly consistent with RNA expression data.     | Consistent with extensive gene/protein characterization data.        | No  |
| <b>HRH1</b>    | HPA029740 | Mainly not consistent with RNA expression data. | Partly consistent with extensive gene/protein characterization data. |     |
| <b>HTR2B</b>   | HPA012867 | Mainly consistent with RNA expression data.     | Partly consistent with extensive gene/protein characterization data. | Yes |
| <b>HTR3B</b>   | HPA039559 | Not consistent with RNA expression data.        | Partly consistent with extensive gene/protein characterization data. |     |
| <b>HTR4</b>    | HPA040591 | Mainly consistent with RNA expression data.     | Consistent with extensive gene/protein characterization data.        | No  |
| <b>HTR5A</b>   | CAB017467 | Mainly not consistent with RNA expression data. | Partly consistent with extensive gene/protein characterization data. |     |
| <b>HTR6</b>    | HPA068165 | Not consistent with RNA expression data.        | Partly consistent with gene/protein characterization data.           |     |
| <b>HTR7</b>    | HPA073617 | Mainly not consistent with RNA expression data. | Consistent with extensive gene/protein characterization data.        |     |
| <b>ICOS</b>    | CAB032575 | Mainly not consistent with RNA expression data. | Consistent with extensive gene/protein characterization data.        |     |



|                |           |                                                            |                                                                      |     |
|----------------|-----------|------------------------------------------------------------|----------------------------------------------------------------------|-----|
| <b>IFNAR1</b>  | HPA029226 | Mainly not consistent with RNA expression data.            | Partly consistent with extensive gene/protein characterization data. |     |
| <b>IGF2R</b>   | HPA011332 | Mainly consistent with RNA expression data.                | Consistent with extensive gene/protein characterization data.        | No  |
| <b>IL10RB</b>  | HPA047550 | Mainly consistent with RNA expression data.                | Partly consistent with extensive gene/protein characterization data. | No  |
| <b>IL1R1</b>   | CAB007779 | Mainly consistent with RNA expression data.                | Partly consistent with extensive gene/protein characterization data. | No  |
| <b>IL1R2</b>   | HPA027597 | No internal RNA expression data available for correlation. | Partly consistent with extensive gene/protein characterization data. |     |
| <b>IL20RA</b>  | CAB024990 | Mainly not consistent with RNA expression data.            | Partly consistent with gene/protein characterization data.           |     |
| <b>IL3RA</b>   | HPA003539 | Mainly not consistent with RNA expression data.            | No available gene/protein characterization data.                     |     |
| <b>ILDR1</b>   | HPA018207 | Mainly not consistent with RNA expression data.            | Partly consistent with gene/protein characterization data.           |     |
| <b>INSR</b>    | HPA036302 | Mainly consistent with RNA expression data.                | Partly consistent with gene/protein characterization data.           | No  |
| <b>ITGA3</b>   | HPA008572 | Mainly consistent with RNA expression data.                | Consistent with extensive gene/protein characterization data.        | Yes |
| <b>ITGA6</b>   | HPA012696 | Mainly consistent with RNA expression data.                | Consistent with extensive gene/protein characterization data.        | No  |
| <b>ITGB5</b>   | HPA001820 | Mainly consistent with RNA expression data.                | Partly consistent with extensive gene/protein characterization data. | No  |
| <b>ITGB6</b>   | CAB073536 | Mainly not consistent with RNA expression data.            | Partly consistent with gene/protein characterization data.           |     |
| <b>JAG1</b>    | CAB010343 | Mainly consistent with RNA expression data.                | Consistent with extensive gene/protein characterization data.        | No  |
| <b>JAM3</b>    | HPA003417 | Mainly not consistent with RNA expression data.            | Partly consistent with extensive gene/protein characterization data. |     |
| <b>KCNMB2</b>  | CAB022649 | Mainly not consistent with RNA expression data.            | Partly consistent with gene/protein characterization data.           |     |
| <b>KISS1R</b>  | HPA007156 | Mainly not consistent with RNA expression data.            | Partly consistent with extensive gene/protein characterization data. |     |
| <b>KITLG</b>   | HPA070395 | Mainly not consistent with RNA expression data.            | Partly consistent with extensive gene/protein characterization data. |     |
| <b>LDLRAD3</b> | HPA038251 | Mainly not consistent with RNA expression data.            | No available gene/protein characterization data.                     |     |
| <b>LGR5</b>    | HPA012530 | Mainly not consistent with RNA expression data.            | Consistent with extensive gene/protein characterization data.        |     |
| <b>LILRA4</b>  | HPA049418 | Mainly not consistent with RNA expression data.            | Partly consistent with gene/protein characterization data.           |     |
| <b>LMAN2</b>   | HPA003927 | Mainly not consistent with RNA expression data.            | Partly consistent with gene/protein characterization data.           |     |
| <b>LMBRD1</b>  | HPA019547 | Mainly consistent with RNA expression data.                | No available gene/protein characterization data.                     |     |
| <b>LRFN3</b>   | HPA048923 | Mainly consistent with RNA expression data.                | No available gene/protein characterization data.                     |     |
| <b>LRFN4</b>   | HPA077570 | Mainly consistent with RNA expression data.                | Partly consistent with gene/protein characterization data.           | No  |
| <b>LRIG2</b>   | HPA015538 | Mainly consistent with RNA expression data.                | Partly consistent with extensive gene/protein characterization data. | No  |
| <b>LRIG3</b>   | HPA010773 | Mainly not consistent with RNA expression data.            | Partly consistent with gene/protein characterization data.           |     |
| <b>LRP1B</b>   | HPA069094 | Mainly not consistent with RNA expression data.            | Partly consistent with extensive gene/protein characterization data. |     |
| <b>LRP4</b>    | HPA011934 | Mainly not consistent with RNA expression data.            | Partly consistent with extensive gene/protein characterization data. |     |
| <b>LRP6</b>    | CAB004490 | Mainly consistent with RNA expression data.                | Partly consistent with extensive gene/protein characterization data. | No  |
| <b>LRRC24</b>  | HPA052250 | Mainly consistent with RNA expression data.                | No available gene/protein characterization data.                     |     |
| <b>LRRC25</b>  | HPA029459 | Mainly not consistent with RNA expression data.            | Partly consistent with gene/protein characterization data.           |     |
| <b>LRRC3B</b>  | HPA015568 | Mainly not consistent with RNA expression data.            | No available gene/protein characterization data.                     |     |
| <b>LRRN2</b>   | HPA029124 | Mainly not consistent with RNA expression data.            | Partly consistent with gene/protein characterization data.           |     |



|         |           |                                                            |                                                                      |     |
|---------|-----------|------------------------------------------------------------|----------------------------------------------------------------------|-----|
| LRRN4CL | HPA050317 | Mainly consistent with RNA expression data.                | No available gene/protein characterization data.                     |     |
| LYPD5   | HPA054670 | Mainly not consistent with RNA expression data.            | No available gene/protein characterization data.                     |     |
| MALRD1  | HPA046848 | Mainly not consistent with RNA expression data.            | No available gene/protein characterization data.                     |     |
| MC3R    | HPA074739 | Mainly not consistent with RNA expression data.            | Partly consistent with gene/protein characterization data.           |     |
| MCOLN1  | HPA031763 | Mainly consistent with RNA expression data.                | No available gene/protein characterization data.                     |     |
| MEGF8   | HPA049248 | Mainly not consistent with RNA expression data.            | No available gene/protein characterization data.                     |     |
| MFS12   | HPA042149 | Mainly consistent with RNA expression data.                | No available gene/protein characterization data.                     |     |
| MFS5    | HPA039773 | Mainly not consistent with RNA expression data.            | No available gene/protein characterization data.                     |     |
| MMP14   | CAB009918 | Mainly consistent with RNA expression data.                | Partly consistent with extensive gene/protein characterization data. | No  |
| MPEG1   | HPA046801 | Mainly not consistent with RNA expression data.            | No available gene/protein characterization data.                     |     |
| MPZL1   | HPA026966 | Mainly not consistent with RNA expression data.            | Partly consistent with gene/protein characterization data.           |     |
| MPZL2   | HPA060740 | Mainly not consistent with RNA expression data.            | No available gene/protein characterization data.                     |     |
| MS4A1   | HPA014341 | Consistent with RNA expression data.                       | Consistent with extensive gene/protein characterization data.        | Yes |
| MSLN    | CAB002216 | Mainly consistent with RNA expression data.                | Partly consistent with extensive gene/protein characterization data. | Yes |
| MUC15   | HPA073304 | Consistent with RNA expression data.                       | Consistent with extensive gene/protein characterization data.        | No  |
| MUC16   | HPA065600 | Consistent with RNA expression data.                       | Consistent with extensive gene/protein characterization data.        | Yes |
| NCAM2   | HPA030900 | Mainly consistent with RNA expression data.                | Partly consistent with extensive gene/protein characterization data. | No  |
| NECTIN4 | HPA010775 | Mainly consistent with RNA expression data.                | Partly consistent with extensive gene/protein characterization data. | Yes |
| NEO1    | CAB009320 | Mainly not consistent with RNA expression data.            | Partly consistent with extensive gene/protein characterization data. |     |
| NETO2   | HPA013180 | Mainly not consistent with RNA expression data.            | Partly consistent with gene/protein characterization data.           |     |
| NIPAL1  | HPA036765 | Mainly not consistent with RNA expression data.            | No available gene/protein characterization data.                     |     |
| NLGN4X  | HPA001651 | Mainly not consistent with RNA expression data.            | Partly consistent with extensive gene/protein characterization data. |     |
| NLGN4Y  | HPA001651 | Mainly not consistent with RNA expression data.            | Partly consistent with extensive gene/protein characterization data. |     |
| NOTCH2  | HPA048743 | Mainly consistent with RNA expression data.                | Partly consistent with gene/protein characterization data.           | No  |
| NOTCH3  | CAB005393 | Mainly consistent with RNA expression data.                | Partly consistent with extensive gene/protein characterization data. | No  |
| NPY4R   | HPA027863 | Mainly not consistent with RNA expression data.            | Partly consistent with extensive gene/protein characterization data. |     |
| NRCAM   | HPA012606 | Mainly not consistent with RNA expression data.            | Partly consistent with extensive gene/protein characterization data. |     |
| NRG1    | HPA010964 | Mainly not consistent with RNA expression data.            | Partly consistent with extensive gene/protein characterization data. |     |
| NRG2    | HPA047973 | Mainly consistent with RNA expression data.                | Partly consistent with gene/protein characterization data.           | No  |
| NRP1    | HPA030278 | No internal RNA expression data available for correlation. | Partly consistent with extensive gene/protein characterization data. |     |
| OPALIN  | HPA014372 | Mainly not consistent with RNA expression data.            | Consistent with extensive gene/protein characterization data.        |     |
| OPN3    | CAB013682 | Mainly not consistent with RNA expression data.            | Partly consistent with extensive gene/protein characterization data. |     |
| OPN5    | HPA026084 | Not consistent with RNA expression data.                   | Consistent with extensive gene/protein characterization data.        |     |
| OSMR    | HPA017278 | Mainly consistent with RNA expression data.                | Consistent with extensive gene/protein characterization data.        | No  |

|          |           |                                                            |                                                                      |     |
|----------|-----------|------------------------------------------------------------|----------------------------------------------------------------------|-----|
| P2RX6    | HPA028777 | Mainly not consistent with RNA expression data.            | Partly consistent with gene/protein characterization data.           |     |
| P2RY11   | HPA014232 | Mainly not consistent with RNA expression data.            | Partly consistent with gene/protein characterization data.           |     |
| P2RY14   | CAB022646 | Mainly not consistent with RNA expression data.            | Partly consistent with gene/protein characterization data.           |     |
| PCDH19   | HPA027533 | Mainly not consistent with RNA expression data.            | Partly consistent with extensive gene/protein characterization data. |     |
| PCDH7    | HPA011866 | Mainly consistent with RNA expression data.                | Partly consistent with extensive gene/protein characterization data. | Yes |
| PCDHA12  | HPA035812 | No internal RNA expression data available for correlation. | Consistent with gene/protein characterization data.                  |     |
| PCDHA5   | HPA044557 | Mainly not consistent with RNA expression data.            | Partly consistent with gene/protein characterization data.           |     |
| PCDHB10  | HPA013445 | Mainly not consistent with RNA expression data.            | No available gene/protein characterization data.                     |     |
| PCDHB5   | HPA013191 | Mainly not consistent with RNA expression data.            | No available gene/protein characterization data.                     |     |
| PCDHB7   | HPA059271 | Mainly not consistent with RNA expression data.            | Partly consistent with extensive gene/protein characterization data. |     |
| PCDHGA11 | HPA008755 | Mainly not consistent with RNA expression data.            | No available gene/protein characterization data.                     |     |
| PCDHGA12 | HPA008755 | Mainly not consistent with RNA expression data.            | No available gene/protein characterization data.                     |     |
| PCDHGA2  | HPA008755 | Mainly consistent with RNA expression data.                | No available gene/protein characterization data.                     |     |
| PCDHGA5  | HPA008755 | Mainly not consistent with RNA expression data.            | No available gene/protein characterization data.                     |     |
| PCDHGA6  | HPA008755 | Mainly not consistent with RNA expression data.            | No available gene/protein characterization data.                     |     |
| PCDHGB7  | HPA008755 | Mainly not consistent with RNA expression data.            | No available gene/protein characterization data.                     |     |
| PCDHGC3  | HPA008755 | Mainly not consistent with RNA expression data.            | Partly consistent with gene/protein characterization data.           |     |
| PLXNA2   | CAB009763 | Mainly not consistent with RNA expression data.            | Partly consistent with extensive gene/protein characterization data. |     |
| PQLC2    | HPA057810 | Mainly not consistent with RNA expression data.            | No available gene/protein characterization data.                     |     |
| PRIMA1   | HPA060047 | Mainly not consistent with RNA expression data.            | Partly consistent with gene/protein characterization data.           |     |
| PROM1    | HPA004922 | Mainly consistent with RNA expression data.                | Partly consistent with extensive gene/protein characterization data. | No  |
| PTGER3   | HPA010689 | Mainly not consistent with RNA expression data.            | Partly consistent with extensive gene/protein characterization data. |     |
| PTGFRN   | HPA017074 | Mainly not consistent with RNA expression data.            | Partly consistent with gene/protein characterization data.           |     |
| PTH1R    | HPA007978 | Not consistent with RNA expression data.                   | Partly consistent with extensive gene/protein characterization data. |     |
| PTK7     | HPA003222 | Mainly not consistent with RNA expression data.            | Partly consistent with extensive gene/protein characterization data. |     |
| PTPRJ    | HPA006026 | Mainly consistent with RNA expression data.                | Consistent with extensive gene/protein characterization data.        | No  |
| PTPRN    | HPA007179 | Consistent with RNA expression data.                       | Consistent with extensive gene/protein characterization data.        | No  |
| PTPRN2   | HPA007255 | Consistent with RNA expression data.                       | Consistent with extensive gene/protein characterization data.        | No  |
| PTPRR    | CAB011461 | Mainly not consistent with RNA expression data.            | Partly consistent with extensive gene/protein characterization data. |     |
| PTPRT    | CAB069423 | Mainly not consistent with RNA expression data.            | Partly consistent with extensive gene/protein characterization data. |     |
| PTPRU    | CAB011476 | Mainly not consistent with RNA expression data.            | Partly consistent with extensive gene/protein characterization data. |     |
| PTPRZ1   | HPA015103 | Mainly consistent with RNA expression data.                | Consistent with extensive gene/protein characterization data.        | No  |
| QRFPR    | HPA050236 | Mainly not consistent with RNA expression data.            | Partly consistent with extensive gene/protein characterization data. |     |
| RNF167   | HPA049810 | Mainly consistent with RNA expression data.                | No available gene/protein characterization data.                     |     |

|                 |           |                                                 |                                                                      |     |
|-----------------|-----------|-------------------------------------------------|----------------------------------------------------------------------|-----|
| <b>ROBO1</b>    | CAB013524 | Mainly not consistent with RNA expression data. | Partly consistent with extensive gene/protein characterization data. |     |
| <b>ROR2</b>     | HPA021868 | Mainly consistent with RNA expression data.     | Consistent with gene/protein characterization data.                  | No  |
| <b>RXFP1</b>    | HPA027067 | Mainly not consistent with RNA expression data. | Partly consistent with extensive gene/protein characterization data. |     |
| <b>SCN3A</b>    | HPA035396 | Mainly not consistent with RNA expression data. | Consistent with gene/protein characterization data.                  |     |
| <b>SCNN1A</b>   | HPA012743 | Mainly consistent with RNA expression data.     | Partly consistent with extensive gene/protein characterization data. | No  |
| <b>SDK1</b>     | HPA011392 | Mainly consistent with RNA expression data.     | No available gene/protein characterization data.                     |     |
| <b>SEMA7A</b>   | HPA042273 | Mainly not consistent with RNA expression data. | Partly consistent with extensive gene/protein characterization data. |     |
| <b>SEZ6L2</b>   | HPA064471 | Mainly consistent with RNA expression data.     | Consistent with gene/protein characterization data.                  | No  |
| <b>SGCA</b>     | HPA007537 | Mainly not consistent with RNA expression data. | Consistent with extensive gene/protein characterization data.        |     |
| <b>SIDT2</b>    | HPA052352 | Mainly not consistent with RNA expression data. | No available gene/protein characterization data.                     |     |
| <b>SIGLEC10</b> | CAB025807 | Mainly consistent with RNA expression data.     | Partly consistent with extensive gene/protein characterization data. | No  |
| <b>SIGLEC8</b>  | HPA012556 | Not consistent with RNA expression data.        | Partly consistent with extensive gene/protein characterization data. |     |
| <b>SIRPA</b>    | CAB002776 | Mainly consistent with RNA expression data.     | Consistent with extensive gene/protein characterization data.        | No  |
| <b>SIRPB1</b>   | HPA047463 | Mainly not consistent with RNA expression data. | Partly consistent with gene/protein characterization data.           |     |
| <b>SIT1</b>     | HPA018506 | Mainly consistent with RNA expression data.     | Partly consistent with extensive gene/protein characterization data. | Yes |
| <b>SLAMF9</b>   | HPA035153 | Not consistent with RNA expression data.        | No available gene/protein characterization data.                     |     |
| <b>SLC10A1</b>  | HPA042727 | Mainly not consistent with RNA expression data. | Consistent with gene/protein characterization data.                  |     |
| <b>SLC10A6</b>  | HPA016662 | Mainly consistent with RNA expression data.     | No available gene/protein characterization data.                     |     |
| <b>SLC11A2</b>  | HPA032139 | Mainly not consistent with RNA expression data. | Partly consistent with extensive gene/protein characterization data. |     |
| <b>SLC12A6</b>  | HPA034563 | Mainly not consistent with RNA expression data. | Consistent with gene/protein characterization data.                  |     |
| <b>SLC12A9</b>  | HPA067536 | Mainly consistent with RNA expression data.     | Partly consistent with gene/protein characterization data.           | No  |
| <b>SLC15A1</b>  | HPA002827 | Mainly not consistent with RNA expression data. | Partly consistent with extensive gene/protein characterization data. |     |
| <b>SLC15A4</b>  | HPA016713 | Mainly consistent with RNA expression data.     | Partly consistent with gene/protein characterization data.           | No  |
| <b>SLC22A16</b> | HPA036902 | Mainly not consistent with RNA expression data. | Partly consistent with gene/protein characterization data.           |     |
| <b>SLC22A17</b> | HPA002728 | Mainly not consistent with RNA expression data. | Partly consistent with gene/protein characterization data.           |     |
| <b>SLC22A2</b>  | CAB068236 | Mainly consistent with RNA expression data.     | Consistent with extensive gene/protein characterization data.        | No  |
| <b>SLC23A2</b>  | HPA052825 | Mainly not consistent with RNA expression data. | Partly consistent with extensive gene/protein characterization data. |     |
| <b>SLC26A6</b>  | HPA048363 | Mainly consistent with RNA expression data.     | Consistent with gene/protein characterization data.                  | No  |
| <b>SLC2A14</b>  | HPA006539 | Mainly consistent with RNA expression data.     | Consistent with extensive gene/protein characterization data.        | Yes |
| <b>SLC30A1</b>  | HPA015275 | Mainly not consistent with RNA expression data. | No available gene/protein characterization data.                     |     |
| <b>SLC37A2</b>  | HPA014948 | Not consistent with RNA expression data.        | No available gene/protein characterization data.                     |     |
| <b>SLC38A1</b>  | HPA052272 | Mainly not consistent with RNA expression data. | Partly consistent with extensive gene/protein characterization data. |     |
| <b>SLC38A5</b>  | HPA047411 | Mainly consistent with RNA expression data.     | Partly consistent with gene/protein characterization data.           | No  |
| <b>SLC39A10</b> | HPA036512 | Mainly consistent with RNA expression data.     | Partly consistent with gene/protein characterization data.           | Yes |

|         |           |                                                            |                                                                      |     |
|---------|-----------|------------------------------------------------------------|----------------------------------------------------------------------|-----|
| SLC39A6 | HPA042377 | Mainly consistent with RNA expression data.                | Consistent with extensive gene/protein characterization data.        | No  |
| SLC43A3 | HPA030551 | Mainly consistent with RNA expression data.                | Partly consistent with gene/protein characterization data.           | No  |
| SLC44A3 | HPA047433 | Mainly consistent with RNA expression data.                | No available gene/protein characterization data.                     |     |
| SLC44A4 | HPA046977 | Mainly consistent with RNA expression data.                | No available gene/protein characterization data.                     |     |
| SLC45A4 | HPA023154 | Mainly consistent with RNA expression data.                | No available gene/protein characterization data.                     |     |
| SLC4A5  | HPA036621 | Mainly not consistent with RNA expression data.            | Partly consistent with gene/protein characterization data.           |     |
| SLC52A3 | HPA049391 | Mainly consistent with RNA expression data.                | Partly consistent with extensive gene/protein characterization data. | No  |
| SLC6A2  | HPA076311 | Mainly consistent with RNA expression data.                | Consistent with extensive gene/protein characterization data.        | No  |
| SLC6A6  | HPA015028 | Mainly consistent with RNA expression data.                | Consistent with extensive gene/protein characterization data.        | Yes |
| SLC6A9  | HPA013977 | Mainly not consistent with RNA expression data.            | Partly consistent with gene/protein characterization data.           |     |
| SLC7A3  | HPA003629 | Mainly not consistent with RNA expression data.            | Consistent with gene/protein characterization data.                  |     |
| SLC8B1  | HPA040668 | Mainly not consistent with RNA expression data.            | Consistent with gene/protein characterization data.                  |     |
| SLC9A2  | HPA035121 | Mainly not consistent with RNA expression data.            | Partly consistent with gene/protein characterization data.           |     |
| SLC9A6  | HPA059445 | Mainly consistent with RNA expression data.                | Partly consistent with gene/protein characterization data.           | No  |
| SMO     | CAB011446 | Mainly consistent with RNA expression data.                | Partly consistent with extensive gene/protein characterization data. | No  |
| SORCS1  | HPA011948 | Mainly consistent with RNA expression data.                | Consistent with gene/protein characterization data.                  | No  |
| SORL1   | HPA031321 | No internal RNA expression data available for correlation. | Partly consistent with gene/protein characterization data.           |     |
| SORT1   | CAB011498 | Mainly consistent with RNA expression data.                | Partly consistent with extensive gene/protein characterization data. | No  |
| SPINT2  | HPA011101 | Mainly not consistent with RNA expression data.            | No available gene/protein characterization data.                     |     |
| SSTR2   | HPA007264 | Not consistent with RNA expression data.                   | Partly consistent with extensive gene/protein characterization data. |     |
| STS     | HPA002904 | Mainly consistent with RNA expression data.                | Consistent with extensive gene/protein characterization data.        | No  |
| SUSD4   | HPA058296 | Mainly not consistent with RNA expression data.            | No available gene/protein characterization data.                     |     |
| SV2A    | CAB002226 | Mainly consistent with RNA expression data.                | Consistent with extensive gene/protein characterization data.        | No  |
| SV2B    | HPA046247 | Mainly not consistent with RNA expression data.            | Partly consistent with gene/protein characterization data.           |     |
| SYP     | CAB055505 | Mainly consistent with RNA expression data.                | Consistent with extensive gene/protein characterization data.        | No  |
| TAS1R3  | HPA053439 | Mainly not consistent with RNA expression data.            | Consistent with gene/protein characterization data.                  |     |
| TECTA   | HPA018870 | Mainly not consistent with RNA expression data.            | Partly consistent with extensive gene/protein characterization data. |     |
| TGFA    | HPA042297 | Mainly not consistent with RNA expression data.            | No available gene/protein characterization data.                     |     |
| TGFBRI  | CAB031481 | Mainly not consistent with RNA expression data.            | Partly consistent with extensive gene/protein characterization data. |     |
| THBD    | HPA002982 | Mainly not consistent with RNA expression data.            | Consistent with extensive gene/protein characterization data.        |     |
| TLR3    | CAB025658 | Mainly consistent with RNA expression data.                | Consistent with extensive gene/protein characterization data.        | No  |
| TMCO3   | HPA039561 | Mainly consistent with RNA expression data.                | No available gene/protein characterization data.                     |     |
| TMED7   | HPA008960 | Mainly consistent with RNA expression data.                | Consistent with extensive gene/protein characterization data.        | No  |
| TMEFF2  | HPA015587 | No internal RNA expression data available for correlation. | Partly consistent with extensive gene/protein characterization data. |     |

|                  |           |                                                            |                                                                      |     |
|------------------|-----------|------------------------------------------------------------|----------------------------------------------------------------------|-----|
| <b>TMEM108</b>   | HPA063350 | Mainly consistent with RNA expression data.                | No available gene/protein characterization data.                     |     |
| <b>TMEM154</b>   | HPA019184 | Mainly not consistent with RNA expression data.            | No available gene/protein characterization data.                     |     |
| <b>TMEM161A</b>  | HPA043365 | Mainly consistent with RNA expression data.                | Partly consistent with gene/protein characterization data.           | No  |
| <b>TMEM204</b>   | HPA014028 | Mainly not consistent with RNA expression data.            | Partly consistent with gene/protein characterization data.           |     |
| <b>TMEM25</b>    | HPA012163 | Mainly not consistent with RNA expression data.            | No available gene/protein characterization data.                     |     |
| <b>TMEM30A</b>   | HPA014561 | Mainly consistent with RNA expression data.                | Partly consistent with gene/protein characterization data.           | No  |
| <b>TNFRSF10C</b> | CAB025635 | Consistent with RNA expression data.                       | Consistent with gene/protein characterization data.                  | No  |
| <b>TNFRSF13B</b> | HPA030453 | Mainly not consistent with RNA expression data.            | Partly consistent with gene/protein characterization data.           |     |
| <b>TNFRSF18</b>  | HPA008025 | No internal RNA expression data available for correlation. | Consistent with extensive gene/protein characterization data.        |     |
| <b>TNFRSF1A</b>  | CAB010309 | Mainly not consistent with RNA expression data.            | Partly consistent with extensive gene/protein characterization data. |     |
| <b>TNFRSF1B</b>  | HPA004796 | No internal RNA expression data available for correlation. | Partly consistent with extensive gene/protein characterization data. |     |
| <b>TNFRSF21</b>  | HPA006746 | Mainly consistent with RNA expression data.                | Partly consistent with extensive gene/protein characterization data. | No  |
| <b>TNFRSF13B</b> | CAB009188 | No internal RNA expression data available for correlation. | Partly consistent with extensive gene/protein characterization data. |     |
| <b>TPO</b>       | HPA007987 | Consistent with RNA expression data.                       | Consistent with extensive gene/protein characterization data.        | No  |
| <b>TRPV6</b>     | HPA062864 | Mainly consistent with RNA expression data.                | Partly consistent with gene/protein characterization data.           | No  |
| <b>TSPAN13</b>   | HPA007426 | Mainly not consistent with RNA expression data.            | Partly consistent with gene/protein characterization data.           |     |
| <b>TSPAN15</b>   | HPA044657 | Mainly consistent with RNA expression data.                | No available gene/protein characterization data.                     |     |
| <b>TSPAN2</b>    | HPA015640 | Not consistent with RNA expression data.                   | Partly consistent with gene/protein characterization data.           |     |
| <b>TSPAN3</b>    | HPA015996 | Mainly not consistent with RNA expression data.            | No available gene/protein characterization data.                     |     |
| <b>TSPAN31</b>   | HPA057489 | Mainly not consistent with RNA expression data.            | No available gene/protein characterization data.                     |     |
| <b>TSPAN9</b>    | HPA014002 | Mainly consistent with RNA expression data.                | No available gene/protein characterization data.                     |     |
| <b>TXNDC15</b>   | HPA015483 | Mainly consistent with RNA expression data.                | No available gene/protein characterization data.                     |     |
| <b>UBAC2</b>     | HPA013448 | Mainly not consistent with RNA expression data.            | No available gene/protein characterization data.                     |     |
| <b>UGT8</b>      | HPA065785 | Consistent with RNA expression data.                       | Consistent with gene/protein characterization data.                  | No  |
| <b>UPK1A</b>     | HPA049879 | Mainly consistent with RNA expression data.                | Consistent with gene/protein characterization data.                  | No  |
| <b>UPK1B</b>     | HPA031799 | Mainly consistent with RNA expression data.                | Consistent with gene/protein characterization data.                  | Yes |
| <b>UPK3B</b>     | HPA010506 | Mainly not consistent with RNA expression data.            | Consistent with gene/protein characterization data.                  |     |
| <b>VLDLR</b>     | CAB032462 | Mainly not consistent with RNA expression data.            | Partly consistent with extensive gene/protein characterization data. |     |
| <b>VSTM4</b>     | HPA017279 | Mainly not consistent with RNA expression data.            | No available gene/protein characterization data.                     |     |
| <b>ZDHHC11B</b>  | HPA057886 | Mainly not consistent with RNA expression data.            | No available gene/protein characterization data.                     |     |
